# Supplementary material for: One pot tandem dehydrogenative cross-coupling of primary and secondary alcohols by ruthenium amido-functionalized 1,2,4-triazole derived N-heterocyclic carbene complexes
Source: Royal Society of Chemistry journal article supplement (doi:10.1039/d2ra05531g), 2022-01-01
Supplement: d2ra05531g1.pdf [file d2ra05531g1.pdf]

## Supporting Information

### One Pot Tandem Dehydrogenative Cross-Coupling of Primary and Secondary Alcohols by Ruthenium Amido-Functionalized 1,2,4-Triazole Derived N-Heterocyclic Carbene Complexes

Anuj Kumar<sup>€</sup>,<sup>‡</sup>, Sabyasachi Ta<sup>€</sup>,<sup>‡</sup>, Chandrasekhar Nettem<sup>€</sup>,<sup>‡</sup>, Joseph M. Tanski<sup>£</sup>, Gopalan  
Rajaraman<sup>‡,\*</sup>, and Prasenjit Ghosh<sup>‡,\*</sup>

<sup>‡</sup>Department of Chemistry

Indian Institute of Technology Bombay

Powai, Mumbai 400 076, India

<sup>£</sup>Department of Chemistry

Vassar College

124 Raymond Avenue

Poughkeepsie, NY, 12604, USA

Email: [pghosh@chem.iitb.ac.in](mailto:pghosh@chem.iitb.ac.in)

Fax: +91 22 2572 3480

<sup>€</sup> A.K., S.T. and C. N. contributed equally to this work.

### 1,3-Diphenylpropan-1-ol (**4**)<sup>1</sup>

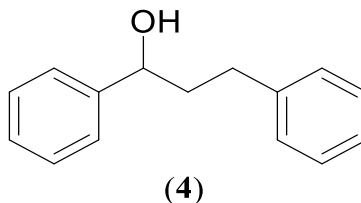

Colorless liquid [0.148 g, 70 % isolated yield (**1b**)] <sup>1</sup>H NMR (CDCl<sub>3</sub>, 400 MHz, 25 °C): δ ppm, 7.37–7.36 (m, 4H, C<sub>6</sub>H<sub>5</sub>CH(OH)CH<sub>2</sub>CH<sub>2</sub>C<sub>6</sub>H<sub>5</sub>), 7.31–7.26 (m, 3H, C<sub>6</sub>H<sub>5</sub>CH(OH)CH<sub>2</sub>CH<sub>2</sub>C<sub>6</sub>H<sub>5</sub>), 7.21–7.17 (m, 3H, C<sub>6</sub>H<sub>5</sub>CH(OH)CH<sub>2</sub>CH<sub>2</sub>C<sub>6</sub>H<sub>5</sub>), 4.71–4.68 (m, 1H, C<sub>6</sub>H<sub>5</sub>CH(OH)CH<sub>2</sub>CH<sub>2</sub>C<sub>6</sub>H<sub>5</sub>), 2.69–2.63 (m, 2H, C<sub>6</sub>H<sub>5</sub>CH(OH)CH<sub>2</sub>CH<sub>2</sub>C<sub>6</sub>H<sub>5</sub>), 2.19–1.99 (m, 2H, C<sub>6</sub>H<sub>5</sub>CH(OH)CH<sub>2</sub>CH<sub>2</sub>C<sub>6</sub>H<sub>5</sub>), 1.61 (b, 1H, C<sub>6</sub>H<sub>5</sub>CH(OH)CH<sub>2</sub>CH<sub>2</sub>C<sub>6</sub>H<sub>5</sub>). <sup>13</sup>C{<sup>1</sup>H} NMR (CDCl<sub>3</sub>, 100 MHz, 25 °C): δ ppm, 144.5 (*ipso*-C<sub>6</sub>H<sub>5</sub>CH(OH)CH<sub>2</sub>CH<sub>2</sub>C<sub>6</sub>H<sub>5</sub>), 141.8 (C<sub>6</sub>H<sub>5</sub>CH(OH)CH<sub>2</sub>CH<sub>2</sub>-*ipso*-C<sub>6</sub>H<sub>5</sub>), 128.5 (*o*-C<sub>6</sub>H<sub>5</sub>CH(OH)CH<sub>2</sub>CH<sub>2</sub>C<sub>6</sub>H<sub>5</sub>), 128.4 (C<sub>6</sub>H<sub>5</sub>CH(OH)CH<sub>2</sub>CH<sub>2</sub>-*o*-C<sub>6</sub>H<sub>5</sub>), 128.4 (*m*-C<sub>6</sub>H<sub>5</sub>CH(OH)CH<sub>2</sub>CH<sub>2</sub>C<sub>6</sub>H<sub>5</sub>), 128.2 (*p*-C<sub>6</sub>H<sub>5</sub>CH(OH)CH<sub>2</sub>CH<sub>2</sub>C<sub>6</sub>H<sub>5</sub>), 127.6 (C<sub>6</sub>H<sub>5</sub>CH(OH)CH<sub>2</sub>CH<sub>2</sub>-*m*-C<sub>6</sub>H<sub>5</sub>), 125.8 (C<sub>6</sub>H<sub>5</sub>CH(OH)CH<sub>2</sub>CH<sub>2</sub>-*p*-C<sub>6</sub>H<sub>5</sub>), 73.9 (C<sub>6</sub>H<sub>5</sub>CH(OH)CH<sub>2</sub>CH<sub>2</sub>C<sub>6</sub>H<sub>5</sub>), 40.5 (C<sub>6</sub>H<sub>5</sub>CH(OH)CH<sub>2</sub>CH<sub>2</sub>C<sub>6</sub>H<sub>5</sub>), 32.0 (C<sub>6</sub>H<sub>5</sub>CH(OH)CH<sub>2</sub>CH<sub>2</sub>C<sub>6</sub>H<sub>5</sub>). GCMS (ESI): [M]<sup>+</sup> *m/z* = 212. Anal. Calcd. for C<sub>15</sub>H<sub>16</sub>O: C, 84.87; H, 7.60; Found: C, 85.72; H, 7.12 %.

### 1,3-Diphenylpropan-1-one (**4'**)<sup>1</sup>

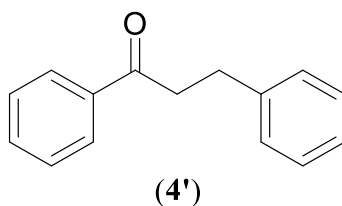

Colorless liquid [0.036 g, 17 % isolated yield (**1b**)]  $^1\text{H}$  NMR ( $\text{CDCl}_3$ , 500 MHz, 25 °C):  $\delta$  ppm, 7.99 (d, 2H,  $^3J_{\text{HH}} = 8$  Hz,  $\text{C}_6\text{H}_5\text{COCH}_2\text{CH}_2\text{C}_6\text{H}_5$ ), 7.59 (t, 1H,  $^3J_{\text{HH}} = 8$  Hz,  $\text{C}_6\text{H}_5\text{COCH}_2\text{CH}_2\text{C}_6\text{H}_5$ ), 7.49 (t, 2H,  $^3J_{\text{HH}} = 8$  Hz,  $\text{C}_6\text{H}_5\text{COCH}_2\text{CH}_2\text{C}_6\text{H}_5$ ), 7.35–7.28 (m, 4H,  $\text{C}_6\text{H}_5\text{COCH}_2\text{CH}_2\text{C}_6\text{H}_5$ ), 7.24 (t, 1H,  $^3J_{\text{HH}} = 7$  Hz,  $\text{C}_6\text{H}_5\text{COCH}_2\text{CH}_2\text{C}_6\text{H}_5$ ), 3.34 (t, 2H,  $^3J_{\text{HH}} = 8$  Hz,  $\text{C}_6\text{H}_5\text{COCH}_2\text{CH}_2\text{C}_6\text{H}_5$ ), 3.11 (t, 2H,  $^3J_{\text{HH}} = 8$  Hz,  $\text{C}_6\text{H}_5\text{COCH}_2\text{CH}_2\text{C}_6\text{H}_5$ ).  $^{13}\text{C}\{^1\text{H}\}$  NMR ( $\text{CDCl}_3$ , 125 MHz, 25 °C):  $\delta$  ppm, 199.3 ( $\text{C}_6\text{H}_5\text{COCH}_2\text{CH}_2\text{C}_6\text{H}_5$ ), 141.3 (*ipso*- $\text{C}_6\text{H}_5\text{COCH}_2\text{CH}_2\text{C}_6\text{H}_5$ ), 136.9 ( $\text{C}_6\text{H}_5\text{COCH}_2\text{CH}_2$ -*ipso*- $\text{C}_6\text{H}_5$ ), 133.0 (*p*- $\text{C}_6\text{H}_5\text{COCH}_2\text{CH}_2\text{C}_6\text{H}_5$ ), 129.0 (*o*- $\text{C}_6\text{H}_5\text{COCH}_2\text{CH}_2\text{C}_6\text{H}_5$ ), 128.6 (*m*- $\text{C}_6\text{H}_5\text{COCH}_2\text{CH}_2\text{C}_6\text{H}_5$ ), 128.5 ( $\text{C}_6\text{H}_5\text{COCH}_2\text{CH}_2$ -*m*- $\text{C}_6\text{H}_5$ ), 128.4 ( $\text{C}_6\text{H}_5\text{COCH}_2\text{CH}_2$ -*o*- $\text{C}_6\text{H}_5$ ), 126.1 ( $\text{C}_6\text{H}_5\text{COCH}_2\text{CH}_2$ -*p*- $\text{C}_6\text{H}_5$ ), 40.5 ( $\text{C}_6\text{H}_5\text{COCH}_2\text{CH}_2\text{C}_6\text{H}_5$ ), 30.2 ( $\text{C}_6\text{H}_5\text{COCH}_2\text{CH}_2\text{C}_6\text{H}_5$ ). GCMS (ESI):  $[\text{M}]^+$   $m/z = 210$ . Anal. Calcd. for  $\text{C}_{15}\text{H}_{14}\text{O}$ : C, 85.68; H, 6.71; Found: C, 85.35; H, 6.24 %.

### 3-(4-Methyl-phenyl)-1-phenylpropan-1-ol (**5**)<sup>1</sup>

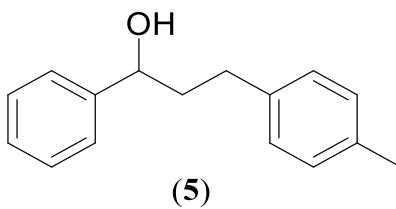

Colorless liquid [0.119 g, 53 % isolated yield (**1b**)]  $^1\text{H}$  NMR ( $\text{CDCl}_3$ , 400 MHz, 25 °C):  $\delta$  ppm, 7.44-7.43 (m, 4H,  $\text{C}_6\text{H}_5\text{CH}(\text{OH})\text{CH}_2\text{CH}_2$ -4- $\text{CH}_3$ - $\text{C}_6\text{H}_4$ ), 7.38–7.35 (m, 1H,  $\text{C}_6\text{H}_5\text{CH}(\text{OH})\text{CH}_2\text{CH}_2$ -4- $\text{CH}_3$ - $\text{C}_6\text{H}_4$ ), 7.21 (br, 4H,  $\text{C}_6\text{H}_5\text{CH}(\text{OH})\text{CH}_2\text{CH}_2$ -4- $\text{CH}_3$ - $\text{C}_6\text{H}_4$ ), 4.76 (t, 1H,  $^3J_{\text{HH}} = 6$  Hz,  $\text{C}_6\text{H}_5\text{CH}(\text{OH})\text{CH}_2\text{CH}_2$ -4- $\text{CH}_3$ - $\text{C}_6\text{H}_4$ ), 2.86–2.79 (m, 1H,  $\text{C}_6\text{H}_5\text{CH}(\text{OH})\text{CH}_2\text{CH}_2$ -4- $\text{CH}_3$ - $\text{C}_6\text{H}_4$ ), 2.72–2.65 (m, 1H,  $\text{C}_6\text{H}_5\text{CH}(\text{OH})\text{CH}_2\text{CH}_2$ -4- $\text{CH}_3$ - $\text{C}_6\text{H}_4$ ), 2.34 (s, 3H,  $\text{C}_6\text{H}_5\text{CH}(\text{OH})\text{CH}_2\text{CH}_2$ -4- $\text{CH}_3$ - $\text{C}_6\text{H}_4$ ), 2.19-2.01 (m, 2H,  $\text{C}_6\text{H}_5\text{CH}(\text{OH})\text{CH}_2\text{CH}_2$ -4- $\text{CH}_3$ - $\text{C}_6\text{H}_4$ ), 1.55 (d, 1H,  $^3J_{\text{HH}} = 6$  Hz,  $\text{C}_6\text{H}_5\text{CH}(\text{OH})\text{CH}_2\text{CH}_2$ -4- $\text{CH}_3$ - $\text{C}_6\text{H}_4$ ).  $^{13}\text{C}\{^1\text{H}\}$  NMR ( $\text{CDCl}_3$ , 100 MHz,

25 °C):  $\delta$  ppm, 144.7 (*ipso*- $\underline{\text{C}}_6\text{H}_5\text{CH}(\text{OH})\text{CH}_2\text{CH}_2\text{-4-CH}_3\text{-C}_6\text{H}_4$ ), 140.1 ( $\text{C}_6\text{H}_5\text{CH}(\text{OH})\text{CH}_2\text{CH}_2\text{-4-CH}_3\text{-ipso-}\underline{\text{C}}_6\text{H}_4$ ), 136.0 ( $\text{C}_6\text{H}_5\text{CH}(\text{OH})\text{CH}_2\text{CH}_2\text{-4-CH}_3\text{-p-}\underline{\text{C}}_6\text{H}_4$ ), 130.2 ( $\text{C}_6\text{H}_5\text{CH}(\text{OH})\text{CH}_2\text{CH}_2\text{-4-CH}_3\text{-m-}\underline{\text{C}}_6\text{H}_4$ ), 128.8 (*m*- $\underline{\text{C}}_6\text{H}_5\text{CH}(\text{OH})\text{CH}_2\text{CH}_2\text{-4-CH}_3\text{-C}_6\text{H}_4$ ), 128.5 (*p*- $\underline{\text{C}}_6\text{H}_5\text{CH}(\text{OH})\text{CH}_2\text{CH}_2\text{-4-CH}_3\text{-C}_6\text{H}_4$ ), 127.6 ( $\text{C}_6\text{H}_5\text{CH}(\text{OH})\text{CH}_2\text{CH}_2\text{-4-CH}_3\text{-o-}\underline{\text{C}}_6\text{H}_4$ ), 126.0 (*o*- $\underline{\text{C}}_6\text{H}_5\text{CH}(\text{OH})\text{CH}_2\text{CH}_2\text{-4-CH}_3\text{-C}_6\text{H}_4$ ), 74.2 ( $\text{C}_6\text{H}_5\text{CH}(\text{OH})\text{CH}_2\text{CH}_2\text{-4-CH}_3\text{-C}_6\text{H}_4$ ), 39.3 ( $\text{C}_6\text{H}_5\text{CH}(\text{OH})\underline{\text{C}}\text{H}_2\text{CH}_2\text{-4-CH}_3\text{-C}_6\text{H}_4$ ), 29.6 ( $\text{C}_6\text{H}_5\text{CH}(\text{OH})\text{CH}_2\underline{\text{C}}\text{H}_2\text{-4-CH}_3\text{-C}_6\text{H}_4$ ), 19.3 ( $\text{C}_6\text{H}_5\text{CH}(\text{OH})\text{CH}_2\text{CH}_2\text{-4-}\underline{\text{C}}\text{H}_3\text{-C}_6\text{H}_4$ ). GCMS (ESI):  $[\text{M}]^+$   $m/z = 226$ . Anal. Calcd. for  $\text{C}_{16}\text{H}_{18}\text{O}$ : C, 84.91; H, 8.02; Found: C, 84.70; H, 8.27 %.

### 3-(Furan-2-yl)-1-phenylpropan-1-ol (**6**)<sup>1</sup>

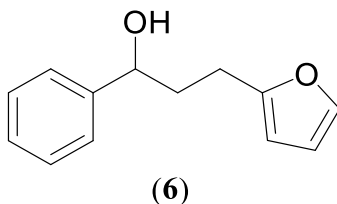

Colorless liquid [0.098 g, 49 % isolated yield (**1b**)] <sup>1</sup>H NMR ( $\text{CDCl}_3$ , 500 MHz, 25 °C):  $\delta$  ppm, 7.37–7.36 (m, 4H,  $\text{C}_6\underline{\text{H}}_5\text{CH}(\text{OH})\text{CH}_2\text{CH}_2\underline{\text{C}}_4\text{H}_3\text{O}$ ), 7.31–7.29 (m, 2H,  $\text{C}_6\underline{\text{H}}_5\text{CH}(\text{OH})\text{CH}_2\text{CH}_2\underline{\text{C}}_4\text{H}_3\text{O}$ ), 6.29–6.28 (m, 1H,  $\text{C}_6\text{H}_5\text{CH}(\text{OH})\text{CH}_2\text{CH}_2\underline{\text{C}}_4\text{H}_3\text{O}$ ), 6.01–6.00 (m, 1H,  $\text{C}_6\text{H}_5\text{CH}(\text{OH})\text{CH}_2\text{CH}_2\underline{\text{C}}_4\text{H}_3\text{O}$ ), 4.73–4.70 (m, 1H,  $\text{C}_6\text{H}_5\underline{\text{C}}\text{H}(\text{OH})\text{CH}_2\text{CH}_2\underline{\text{C}}_4\text{H}_3\text{O}$ ), 2.76–2.71 (m, 2H,  $\text{C}_6\text{H}_5\text{CH}(\text{OH})\underline{\text{C}}\text{H}_2\text{CH}_2\underline{\text{C}}_4\text{H}_3\text{O}$ ), 2.16–2.02 (m, 2H,  $\text{C}_6\text{H}_5\text{CH}(\text{OH})\text{CH}_2\underline{\text{C}}\text{H}_2\underline{\text{C}}_4\text{H}_3\text{O}$ ), 1.63 (br, 1H,  $\text{C}_6\text{H}_5\text{CH}(\underline{\text{O}}\text{H})\text{CH}_2\text{CH}_2\underline{\text{C}}_4\text{H}_3\text{O}$ ). <sup>13</sup>C{<sup>1</sup>H} NMR ( $\text{CDCl}_3$ , 125 MHz, 25 °C):  $\delta$  ppm, 155.5 ( $\text{C}_6\text{H}_5\text{CH}(\text{OH})\text{CH}_2\text{CH}_2\text{-ipso-}\underline{\text{C}}_4\text{H}_3\text{O}$ ), 144.3 (*ipso*- $\underline{\text{C}}_6\text{H}_5\text{CH}(\text{OH})\text{CH}_2\text{CH}_2\underline{\text{C}}_4\text{H}_3\text{O}$ ), 140.9 ( $\text{C}_6\text{H}_5\text{CH}(\text{OH})\text{CH}_2\text{CH}_2\underline{\text{C}}_4\text{H}_3\text{O}$ ), 128.5 (*m*- $\underline{\text{C}}_6\text{H}_5\text{CH}(\text{OH})\text{CH}_2\text{CH}_2\underline{\text{C}}_4\text{H}_3\text{O}$ ), 127.7 (*p*- $\underline{\text{C}}_6\text{H}_5\text{CH}(\text{OH})\text{CH}_2\text{CH}_2\underline{\text{C}}_4\text{H}_3\text{O}$ ), 125.8 (*o*- $\underline{\text{C}}_6\text{H}_5\text{CH}(\text{OH})\text{CH}_2\text{CH}_2\underline{\text{C}}_4\text{H}_3\text{O}$ ), 110.1 ( $\text{C}_6\text{H}_5\text{CH}(\text{OH})\text{CH}_2\text{CH}_2\underline{\text{C}}_4\text{H}_3\text{O}$ ), 105.0 ( $\text{C}_6\text{H}_5\text{CH}(\text{OH})\text{CH}_2\text{CH}_2\underline{\text{C}}_4\text{H}_3\text{O}$ ), 73.7



(C<sub>6</sub>H<sub>5</sub>CH(OH)CH<sub>2</sub>CH<sub>2</sub>C<sub>4</sub>H<sub>3</sub>O), 37.1 (C<sub>6</sub>H<sub>5</sub>CH(OH)CH<sub>2</sub>CH<sub>2</sub>C<sub>4</sub>H<sub>3</sub>O), 24.4  
 (C<sub>6</sub>H<sub>5</sub>CH(OH)CH<sub>2</sub>CH<sub>2</sub>C<sub>4</sub>H<sub>3</sub>O). GCMS (ESI): [M]<sup>+</sup> *m/z* = 202. Anal. Calcd. for C<sub>13</sub>H<sub>14</sub>O<sub>2</sub>: C, 77.20; H, 6.98; Found: C, 78.14; H, 5.89 %.

### 1-Phenyl-3-(thiophen-2-yl)-propan-1-ol (**7**)<sup>1</sup>

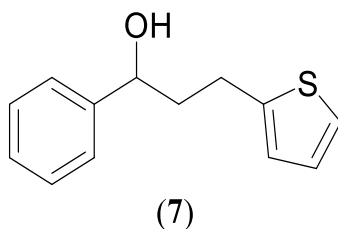

Colorless liquid [0.136 g, 64 % isolated yield (**1b**)] <sup>1</sup>H NMR (CDCl<sub>3</sub>, 400 MHz, 25 °C): δ ppm, 7.39–7.38 (m, 4H, C<sub>6</sub>H<sub>5</sub>CH(OH)CH<sub>2</sub>CH<sub>2</sub>C<sub>4</sub>H<sub>3</sub>S), 7.34–7.32 (m, 1H, C<sub>6</sub>H<sub>5</sub>CH(OH)CH<sub>2</sub>CH<sub>2</sub>C<sub>4</sub>H<sub>3</sub>S), 7.15 (dd, 1H, <sup>3</sup>J<sub>HH</sub> = 5 Hz, <sup>4</sup>J<sub>HH</sub> = 1 Hz, C<sub>6</sub>H<sub>5</sub>CH(OH)CH<sub>2</sub>CH<sub>2</sub>C<sub>4</sub>H<sub>3</sub>S), 6.95 (dd, 1H, <sup>3</sup>J<sub>HH</sub> = 4 Hz, <sup>4</sup>J<sub>HH</sub> = 2 Hz, C<sub>6</sub>H<sub>5</sub>CH(OH)CH<sub>2</sub>CH<sub>2</sub>C<sub>4</sub>H<sub>3</sub>S), 6.84–6.83 (m, 1H, C<sub>6</sub>H<sub>5</sub>CH(OH)CH<sub>2</sub>CH<sub>2</sub>C<sub>4</sub>H<sub>3</sub>S), 4.77–4.74 (m, 1H, C<sub>6</sub>H<sub>5</sub>CH(OH)CH<sub>2</sub>CH<sub>2</sub>C<sub>4</sub>H<sub>3</sub>S), 2.99–2.94 (m, 2H, C<sub>6</sub>H<sub>5</sub>CH(OH)CH<sub>2</sub>CH<sub>2</sub>C<sub>4</sub>H<sub>3</sub>S), 2.26–2.18 (m, 1H, C<sub>6</sub>H<sub>5</sub>CH(OH)CH<sub>2</sub>CH<sub>2</sub>C<sub>4</sub>H<sub>3</sub>S), 2.26–2.07 (m, 1H, C<sub>6</sub>H<sub>5</sub>CH(OH)CH<sub>2</sub>CH<sub>2</sub>C<sub>4</sub>H<sub>3</sub>S), 1.97 (br, 1H, C<sub>6</sub>H<sub>5</sub>CH(OH)CH<sub>2</sub>CH<sub>2</sub>C<sub>4</sub>H<sub>3</sub>S). <sup>13</sup>C{<sup>1</sup>H} NMR (CDCl<sub>3</sub>, 125 MHz, 25 °C): δ ppm, 144.6 (*ipso*-C<sub>6</sub>H<sub>5</sub>CH(OH)CH<sub>2</sub>CH<sub>2</sub>C<sub>4</sub>H<sub>3</sub>S), 144.3 (C<sub>6</sub>H<sub>5</sub>CH(OH)CH<sub>2</sub>CH<sub>2</sub>-*ipso*-C<sub>4</sub>H<sub>3</sub>S), 128.5 (*m*-C<sub>6</sub>H<sub>5</sub>CH(OH)CH<sub>2</sub>CH<sub>2</sub>C<sub>4</sub>H<sub>3</sub>S), 127.7 (C<sub>6</sub>H<sub>5</sub>CH(OH)CH<sub>2</sub>CH<sub>2</sub>C<sub>4</sub>H<sub>3</sub>S), 126.5 (C<sub>6</sub>H<sub>5</sub>CH(OH)CH<sub>2</sub>CH<sub>2</sub>C<sub>4</sub>H<sub>3</sub>S), 125.9 (*o*-C<sub>6</sub>H<sub>5</sub>CH(OH)CH<sub>2</sub>CH<sub>2</sub>C<sub>4</sub>H<sub>3</sub>S), 124.8 (*p*-C<sub>6</sub>H<sub>5</sub>CH(OH)CH<sub>2</sub>CH<sub>2</sub>C<sub>4</sub>H<sub>3</sub>S), 123.2 (C<sub>6</sub>H<sub>5</sub>CH(OH)CH<sub>2</sub>CH<sub>2</sub>C<sub>4</sub>H<sub>3</sub>S), 73.5 (C<sub>6</sub>H<sub>5</sub>CH(OH)CH<sub>2</sub>CH<sub>2</sub>C<sub>4</sub>H<sub>3</sub>S), 40.6 (C<sub>6</sub>H<sub>5</sub>CH(OH)CH<sub>2</sub>CH<sub>2</sub>C<sub>4</sub>H<sub>3</sub>S), 26.2 (C<sub>6</sub>H<sub>5</sub>CH(OH)CH<sub>2</sub>CH<sub>2</sub>C<sub>4</sub>H<sub>3</sub>S),

(C<sub>6</sub>H<sub>5</sub>CH(OH)CH<sub>2</sub>CH<sub>2</sub>C<sub>4</sub>H<sub>3</sub>S). GCMS (ESI): [M]<sup>+</sup> *m/z* = 218. Anal. Calcd. for C<sub>13</sub>H<sub>14</sub>OS: C, 71.52; H, 6.46; S, 14.69; Found: C, 72.42; H, 6.18; S, 14.30 %.

### 3-(4-Methoxyphenyl)-1-phenylpropan-1-ol (**8**)<sup>1</sup>

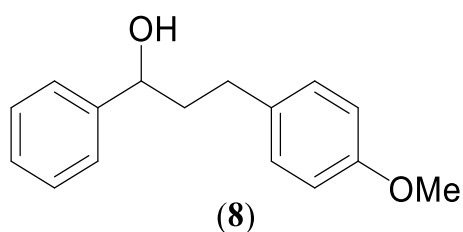

Colorless liquid [0.153 g, 66 % isolated yield (**1b**)] <sup>1</sup>H NMR (CDCl<sub>3</sub>, 400 MHz, 25 °C): δ ppm, 7.38–7.37 (m, 4H, C<sub>6</sub>H<sub>5</sub>CH(OH)CH<sub>2</sub>CH<sub>2</sub>-4-OCH<sub>3</sub>-C<sub>6</sub>H<sub>4</sub>), 7.32–7.28 (m, 1H, C<sub>6</sub>H<sub>5</sub>CH(OH)CH<sub>2</sub>CH<sub>2</sub>-4-OCH<sub>3</sub>-C<sub>6</sub>H<sub>4</sub>), 7.13 (d, 2H, <sup>3</sup>J<sub>HH</sub> = 9 Hz, C<sub>6</sub>H<sub>5</sub>CH(OH)CH<sub>2</sub>CH<sub>2</sub>-4-OCH<sub>3</sub>-C<sub>6</sub>H<sub>4</sub>), 6.85 (d, 2H, <sup>3</sup>J<sub>HH</sub> = 8 Hz, C<sub>6</sub>H<sub>5</sub>CH(OH)CH<sub>2</sub>CH<sub>2</sub>-4-OCH<sub>3</sub>-C<sub>6</sub>H<sub>4</sub>), 4.71–4.68 (m, 1H, C<sub>6</sub>H<sub>5</sub>CH(OH)CH<sub>2</sub>CH<sub>2</sub>-4-OCH<sub>3</sub>-C<sub>6</sub>H<sub>4</sub>), 3.81 (s, 3H, C<sub>6</sub>H<sub>5</sub>CH(OH)CH<sub>2</sub>CH<sub>2</sub>-4-OCH<sub>3</sub>-C<sub>6</sub>H<sub>4</sub>), 2.75–2.60 (m, 2H, C<sub>6</sub>H<sub>5</sub>CH(OH)CH<sub>2</sub>CH<sub>2</sub>-4-OCH<sub>3</sub>-C<sub>6</sub>H<sub>4</sub>), 2.17–1.98 (m, 2H, C<sub>6</sub>H<sub>5</sub>CH(OH)CH<sub>2</sub>CH<sub>2</sub>-4-OCH<sub>3</sub>-C<sub>6</sub>H<sub>4</sub>), 1.94 (br, 1H, C<sub>6</sub>H<sub>5</sub>CH(OH)CH<sub>2</sub>CH<sub>2</sub>-4-OCH<sub>3</sub>-C<sub>6</sub>H<sub>4</sub>). <sup>13</sup>C{<sup>1</sup>H} NMR (CDCl<sub>3</sub>, 100 MHz, 25 °C): δ ppm, 157.8 (C<sub>6</sub>H<sub>5</sub>CH(OH)CH<sub>2</sub>CH<sub>2</sub>-4-OCH<sub>3</sub>-*p*-C<sub>6</sub>H<sub>4</sub>), 144.6 (*ipso*-C<sub>6</sub>H<sub>5</sub>CH(OH)CH<sub>2</sub>CH<sub>2</sub>-4-OCH<sub>3</sub>-C<sub>6</sub>H<sub>4</sub>), 133.8 (C<sub>6</sub>H<sub>5</sub>CH(OH)CH<sub>2</sub>CH<sub>2</sub>-4-OCH<sub>3</sub>-*ipso*-C<sub>6</sub>H<sub>4</sub>), 129.5 (C<sub>6</sub>H<sub>5</sub>CH(OH)CH<sub>2</sub>CH<sub>2</sub>-4-OCH<sub>3</sub>-*o*-C<sub>6</sub>H<sub>4</sub>), 128.5 (*m*-C<sub>6</sub>H<sub>5</sub>CH(OH)CH<sub>2</sub>CH<sub>2</sub>-4-OCH<sub>3</sub>-C<sub>6</sub>H<sub>4</sub>), 127.6 (*p*-C<sub>6</sub>H<sub>5</sub>CH(OH)CH<sub>2</sub>CH<sub>2</sub>-4-OCH<sub>3</sub>-C<sub>6</sub>H<sub>4</sub>), 125.9 (*o*-C<sub>6</sub>H<sub>5</sub>CH(OH)CH<sub>2</sub>CH<sub>2</sub>-4-OCH<sub>3</sub>-C<sub>6</sub>H<sub>4</sub>), 113.8 (C<sub>6</sub>H<sub>5</sub>CH(OH)CH<sub>2</sub>CH<sub>2</sub>-4-OCH<sub>3</sub>-*o*-C<sub>6</sub>H<sub>4</sub>), 73.8 (C<sub>6</sub>H<sub>5</sub>CH(OH)CH<sub>2</sub>CH<sub>2</sub>-4-OCH<sub>3</sub>-C<sub>6</sub>H<sub>4</sub>), 55.2 (C<sub>6</sub>H<sub>5</sub>CH(OH)CH<sub>2</sub>CH<sub>2</sub>-4-OCH<sub>3</sub>-C<sub>6</sub>H<sub>4</sub>), 40.7 (C<sub>6</sub>H<sub>5</sub>CH(OH)CH<sub>2</sub>CH<sub>2</sub>-4-OCH<sub>3</sub>-C<sub>6</sub>H<sub>4</sub>).

31.1 (C<sub>6</sub>H<sub>5</sub>CH(OH)CH<sub>2</sub>CH<sub>2</sub>-4-OCH<sub>3</sub>-C<sub>6</sub>H<sub>4</sub>). GCMS (ESI): [M]<sup>+</sup> *m/z* = 242. Anal. Calcd. for C<sub>16</sub>H<sub>18</sub>O<sub>2</sub>: C, 79.31; H, 7.49; Found: C, 80.27; H, 7.05 %.

### 3-(2-Bromophenyl)-1-phenylpropan-1-ol (**9**)<sup>1</sup>

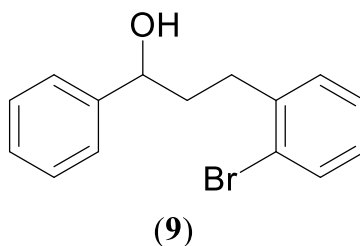

Colorless liquid [0.186 g, 64 % isolated yield (**1b**)] <sup>1</sup>H NMR (CDCl<sub>3</sub>, 400 MHz, 25 °C): δ ppm, 7.54 (d, 1H, <sup>3</sup>J<sub>HH</sub> = 8 Hz, C<sub>6</sub>H<sub>5</sub>CH(OH)CH<sub>2</sub>CH<sub>2</sub>-2-Br-C<sub>6</sub>H<sub>4</sub>), 7.43–7.36 (m, 4H, C<sub>6</sub>H<sub>5</sub>CH(OH)CH<sub>2</sub>CH<sub>2</sub>-2-Br-C<sub>6</sub>H<sub>4</sub>), 7.33–7.28 (m, 2H, C<sub>6</sub>H<sub>5</sub>CH(OH)CH<sub>2</sub>CH<sub>2</sub>-2-Br-C<sub>6</sub>H<sub>4</sub>), 7.25–7.23 (m, 1H, C<sub>6</sub>H<sub>5</sub>CH(OH)CH<sub>2</sub>CH<sub>2</sub>-2-Br-C<sub>6</sub>H<sub>4</sub>), 7.09–7.05 (m, 1H, C<sub>6</sub>H<sub>5</sub>CH(OH)CH<sub>2</sub>CH<sub>2</sub>-2-Br-C<sub>6</sub>H<sub>4</sub>), 4.78–4.74 (m, 1H, C<sub>6</sub>H<sub>5</sub>CH(OH)CH<sub>2</sub>CH<sub>2</sub>-2-Br-C<sub>6</sub>H<sub>4</sub>), 2.96–2.76 (m, 2H, C<sub>6</sub>H<sub>5</sub>CH(OH)CH<sub>2</sub>CH<sub>2</sub>-2-Br-C<sub>6</sub>H<sub>4</sub>), 2.13–2.02 (m, 2H, C<sub>6</sub>H<sub>5</sub>CH(OH)CH<sub>2</sub>CH<sub>2</sub>-2-Br-C<sub>6</sub>H<sub>4</sub>), 1.96 (d, 1H, <sup>3</sup>J<sub>HH</sub> = 4 Hz, C<sub>6</sub>H<sub>5</sub>CH(OH)CH<sub>2</sub>CH<sub>2</sub>-2-Br-C<sub>6</sub>H<sub>4</sub>). <sup>13</sup>C{<sup>1</sup>H} NMR (CDCl<sub>3</sub>, 100 MHz, 25 °C): δ ppm, 144.3 (*ipso*-C<sub>6</sub>H<sub>5</sub>CH(OH)CH<sub>2</sub>CH<sub>2</sub>-2-Br-C<sub>6</sub>H<sub>4</sub>), 141.1 (C<sub>6</sub>H<sub>5</sub>CH(OH)CH<sub>2</sub>CH<sub>2</sub>-2-Br-*ipso*-C<sub>6</sub>H<sub>4</sub>), 132.8 (C<sub>6</sub>H<sub>5</sub>CH(OH)CH<sub>2</sub>CH<sub>2</sub>-2-Br-*m*-C<sub>6</sub>H<sub>4</sub>), 130.4 (C<sub>6</sub>H<sub>5</sub>CH(OH)CH<sub>2</sub>CH<sub>2</sub>-2-Br-*o*-C<sub>6</sub>H<sub>4</sub>), 128.5 (*m*-C<sub>6</sub>H<sub>5</sub>CH(OH)CH<sub>2</sub>CH<sub>2</sub>-2-Br-C<sub>6</sub>H<sub>4</sub>), 127.6 (C<sub>6</sub>H<sub>5</sub>CH(OH)CH<sub>2</sub>CH<sub>2</sub>-2-Br-*p*-C<sub>6</sub>H<sub>4</sub>), 127.4 (*o*-C<sub>6</sub>H<sub>5</sub>CH(OH)CH<sub>2</sub>CH<sub>2</sub>-2-Br-C<sub>6</sub>H<sub>4</sub>), 125.9 (C<sub>6</sub>H<sub>5</sub>CH(OH)CH<sub>2</sub>CH<sub>2</sub>-2-Br-*m*-C<sub>6</sub>H<sub>4</sub>), 124.4 (C<sub>6</sub>H<sub>5</sub>CH(OH)CH<sub>2</sub>CH<sub>2</sub>-2-Br-*o*-C<sub>6</sub>H<sub>4</sub>), 73.9 (C<sub>6</sub>H<sub>5</sub>CH(OH)CH<sub>2</sub>CH<sub>2</sub>-2-Br-C<sub>6</sub>H<sub>4</sub>), 38.9 (C<sub>6</sub>H<sub>5</sub>CH(OH)CH<sub>2</sub>CH<sub>2</sub>-2-Br-C<sub>6</sub>H<sub>4</sub>), 32.5 (C<sub>6</sub>H<sub>5</sub>CH(OH)CH<sub>2</sub>CH<sub>2</sub>-2-Br-C<sub>6</sub>H<sub>4</sub>). GCMS (ESI): [M]<sup>+</sup> *m/z* = 290. Anal. Calcd. for C<sub>15</sub>H<sub>15</sub>BrO: C, 61.87; H, 5.19; Found: C, 62.24; H, 4.61 %.

### 3-Phenyl-1-(*o*-methoxy)propan-1-ol (**10**)<sup>1</sup>

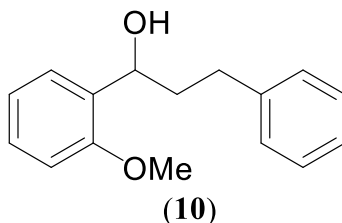

Colorless liquid [0.146 g, 60 % isolated yield (**1b**)] <sup>1</sup>H NMR (CDCl<sub>3</sub>, 400 MHz, 25 °C): δ ppm, 7.39–7.19 (m, 7H, 4-OCH<sub>3</sub>-C<sub>6</sub>H<sub>4</sub>CH(OH)CH<sub>2</sub>CH<sub>2</sub>C<sub>6</sub>H<sub>5</sub>), 7.02–6.98 (m, 1H, 4-OCH<sub>3</sub>-C<sub>6</sub>H<sub>4</sub>CH(OH)CH<sub>2</sub>CH<sub>2</sub>C<sub>6</sub>H<sub>5</sub>), 6.91 (d, 1H, <sup>3</sup>J<sub>HH</sub> = 8 Hz, 4-OCH<sub>3</sub>-C<sub>6</sub>H<sub>4</sub>CH(OH)CH<sub>2</sub>CH<sub>2</sub>C<sub>6</sub>H<sub>5</sub>), 4.93 (br, 1H, 4-OCH<sub>3</sub>-C<sub>6</sub>H<sub>4</sub>CH(OH)CH<sub>2</sub>CH<sub>2</sub>C<sub>6</sub>H<sub>5</sub>), 3.87 (s, 3H, 4-OCH<sub>3</sub>-C<sub>6</sub>H<sub>4</sub>CH(OH)CH<sub>2</sub>CH<sub>2</sub>C<sub>6</sub>H<sub>5</sub>), 2.91–2.83 (m, 1H, 4-OCH<sub>3</sub>-C<sub>6</sub>H<sub>4</sub>CH(OH)CH<sub>2</sub>CH<sub>2</sub>C<sub>6</sub>H<sub>5</sub>), 2.75–2.70 (m, 1H, 4-OCH<sub>3</sub>-C<sub>6</sub>H<sub>4</sub>CH(OH)CH<sub>2</sub>CH<sub>2</sub>C<sub>6</sub>H<sub>5</sub>), 2.23–2.08 (m, 2H, 4-OCH<sub>3</sub>-C<sub>6</sub>H<sub>4</sub>CH(OH)CH<sub>2</sub>CH<sub>2</sub>C<sub>6</sub>H<sub>5</sub>), 1.55 (d, 1H, <sup>3</sup>J<sub>HH</sub> = 6 Hz, 4-OCH<sub>3</sub>-C<sub>6</sub>H<sub>4</sub>CH(OH)CH<sub>2</sub>CH<sub>2</sub>C<sub>6</sub>H<sub>5</sub>). <sup>13</sup>C{<sup>1</sup>H} NMR (CDCl<sub>3</sub>, 100 MHz, 25 °C): δ ppm, 156.6 (4-OCH<sub>3</sub>-C<sub>6</sub>H<sub>4</sub>CH(OH)CH<sub>2</sub>CH<sub>2</sub>C<sub>6</sub>H<sub>5</sub>), 142.2 (4-OCH<sub>3</sub>-C<sub>6</sub>H<sub>4</sub>CH(OH)CH<sub>2</sub>CH<sub>2</sub>-*ipso*-C<sub>6</sub>H<sub>5</sub>), 132.3 (4-OCH<sub>3</sub>-C<sub>6</sub>H<sub>4</sub>CH(OH)CH<sub>2</sub>CH<sub>2</sub>-*m*-C<sub>6</sub>H<sub>5</sub>), 128.5 (4-OCH<sub>3</sub>-C<sub>6</sub>H<sub>4</sub>CH(OH)CH<sub>2</sub>CH<sub>2</sub>-*o*-C<sub>6</sub>H<sub>5</sub>), 128.3 (4-OCH<sub>3</sub>-C<sub>6</sub>H<sub>4</sub>CH(OH)CH<sub>2</sub>CH<sub>2</sub>C<sub>6</sub>H<sub>5</sub>), 127.0 (4-OCH<sub>3</sub>-C<sub>6</sub>H<sub>4</sub>CH(OH)CH<sub>2</sub>CH<sub>2</sub>C<sub>6</sub>H<sub>5</sub>), 126.1 (4-OCH<sub>3</sub>-C<sub>6</sub>H<sub>4</sub>CH(OH)CH<sub>2</sub>CH<sub>2</sub>-*p*-C<sub>6</sub>H<sub>5</sub>), 125.7 (4-OCH<sub>3</sub>-*ipso*-C<sub>6</sub>H<sub>4</sub>CH(OH)CH<sub>2</sub>CH<sub>2</sub>C<sub>6</sub>H<sub>5</sub>), 120.8 (4-OCH<sub>3</sub>-C<sub>6</sub>H<sub>4</sub>CH(OH)CH<sub>2</sub>CH<sub>2</sub>C<sub>6</sub>H<sub>5</sub>), 110.5 (4-OCH<sub>3</sub>-C<sub>6</sub>H<sub>4</sub>CH(OH)CH<sub>2</sub>CH<sub>2</sub>C<sub>6</sub>H<sub>5</sub>), 70.6 (4-OCH<sub>3</sub>-C<sub>6</sub>H<sub>4</sub>CH(OH)CH<sub>2</sub>CH<sub>2</sub>C<sub>6</sub>H<sub>5</sub>), 55.2 (4-OCH<sub>3</sub>-C<sub>6</sub>H<sub>4</sub>CH(OH)CH<sub>2</sub>CH<sub>2</sub>C<sub>6</sub>H<sub>5</sub>), 38.7 (4-OCH<sub>3</sub>-C<sub>6</sub>H<sub>4</sub>CH(OH)CH<sub>2</sub>CH<sub>2</sub>C<sub>6</sub>H<sub>5</sub>), 32.3 (4-OCH<sub>3</sub>-C<sub>6</sub>H<sub>4</sub>CH(OH)CH<sub>2</sub>CH<sub>2</sub>C<sub>6</sub>H<sub>5</sub>). GCMS (ESI): [M]<sup>+</sup> *m/z* = 242. Anal. Calcd. for C<sub>16</sub>H<sub>18</sub>O<sub>2</sub>: C, 79.31; H, 7.49; Found: C, 79.93; H, 6.38 %.

### 1-(benzo[1,3]dioxol-5-yl)-3-phenylpropan-1-ol (**11**)<sup>1</sup>

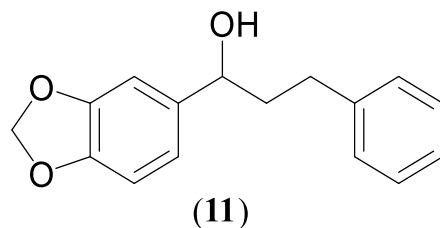

Colorless liquid [0.154 g, 60 % isolated yield (**1b**)]  $^1\text{H}$  NMR ( $\text{CDCl}_3$ , 400 MHz, 25 °C):  $\delta$  ppm, 7.32–7.28 (m, 1H,  $\text{OCH}_2\text{OC}_6\text{H}_3\text{CH}(\text{OH})\text{CH}_2\text{CH}_2\text{C}_6\text{H}_5$ ), 7.22–7.20 (m, 2H,  $\text{OCH}_2\text{OC}_6\text{H}_3\text{CH}(\text{OH})\text{CH}_2\text{CH}_2\text{C}_6\text{H}_5$ ), 6.92–6.89 (m, 2H,  $\text{OCH}_2\text{OC}_6\text{H}_3\text{CH}(\text{OH})\text{CH}_2\text{CH}_2\text{C}_6\text{H}_5$ ), 6.85–6.78 (m, 3H,  $\text{OCH}_2\text{OC}_6\text{H}_3\text{CH}(\text{OH})\text{CH}_2\text{CH}_2\text{C}_6\text{H}_5$ ), 5.97 (s, 2H,  $\text{OCH}_2\text{OC}_6\text{H}_3\text{CH}(\text{OH})\text{CH}_2\text{CH}_2\text{C}_6\text{H}_5$ ), 4.87–4.82 (m, 1H,  $\text{OCH}_2\text{OC}_6\text{H}_3\text{CH}(\text{OH})\text{CH}_2\text{CH}_2\text{C}_6\text{H}_5$ ), 2.77–2.62 (m, 2H,  $\text{OCH}_2\text{OC}_6\text{H}_3\text{CH}(\text{OH})\text{CH}_2\text{CH}_2\text{C}_6\text{H}_5$ ), 2.19–1.96 (m, 2H,  $\text{OCH}_2\text{OC}_6\text{H}_3\text{CH}(\text{OH})\text{CH}_2\text{CH}_2\text{C}_6\text{H}_5$ ), 2.19–1.85 (br, 1H,  $\text{OCH}_2\text{OC}_6\text{H}_3\text{CH}(\text{OH})\text{CH}_2\text{CH}_2\text{C}_6\text{H}_5$ ).

$^{13}\text{C}\{^1\text{H}\}$  NMR ( $\text{CDCl}_3$ , 100 MHz, 25 °C):  $\delta$  ppm, 151.7 ( $\text{OCH}_2\text{OC}_6\text{H}_3\text{CH}(\text{OH})\text{CH}_2\text{CH}_2\text{C}_6\text{H}_5$ ), 147.8 ( $\text{OCH}_2\text{OC}_6\text{H}_3\text{CH}(\text{OH})\text{CH}_2\text{CH}_2\text{C}_6\text{H}_5$ ), 147.0 ( $\text{OCH}_2\text{O-}i\text{ipso-C}_6\text{H}_3\text{CH}(\text{OH})\text{CH}_2\text{CH}_2\text{C}_6\text{H}_5$ ), 141.7 ( $\text{OCH}_2\text{OC}_6\text{H}_3\text{CH}(\text{OH})\text{CH}_2\text{CH}_2\text{-}i\text{ipso-C}_6\text{H}_5$ ), 138.6 ( $\text{OCH}_2\text{OC}_6\text{H}_3\text{CH}(\text{OH})\text{CH}_2\text{CH}_2\text{C}_6\text{H}_5$ ), 128.4 ( $\text{OCH}_2\text{OC}_6\text{H}_3\text{CH}(\text{OH})\text{CH}_2\text{CH}_2\text{-}m\text{-C}_6\text{H}_5$ ), 125.8 ( $\text{OCH}_2\text{OC}_6\text{H}_3\text{CH}(\text{OH})\text{CH}_2\text{CH}_2\text{-}o\text{-C}_6\text{H}_5$ ), 119.4 ( $\text{OCH}_2\text{OC}_6\text{H}_3\text{CH}(\text{OH})\text{CH}_2\text{CH}_2\text{-}p\text{-C}_6\text{H}_5$ ), 108.1 ( $\text{OCH}_2\text{OC}_6\text{H}_3\text{CH}(\text{OH})\text{CH}_2\text{CH}_2\text{C}_6\text{H}_5$ ), 106.4 ( $\text{OCH}_2\text{OC}_6\text{H}_3\text{CH}(\text{OH})\text{CH}_2\text{CH}_2\text{C}_6\text{H}_5$ ), 101.0 ( $\text{OCH}_2\text{OC}_6\text{H}_3\text{CH}(\text{OH})\text{CH}_2\text{CH}_2\text{C}_6\text{H}_5$ ), 73.7 ( $\text{OCH}_2\text{OC}_6\text{H}_3\text{CH}(\text{OH})\text{CH}_2\text{CH}_2\text{C}_6\text{H}_5$ ), 40.4 ( $\text{OCH}_2\text{OC}_6\text{H}_3\text{CH}(\text{OH})\text{CH}_2\text{CH}_2\text{C}_6\text{H}_5$ ), 32.0 ( $\text{OCH}_2\text{OC}_6\text{H}_3\text{CH}(\text{OH})\text{CH}_2\text{CH}_2\text{C}_6\text{H}_5$ ). GCMS (ESI):  $[\text{M}]^+ m/z = 256$ . Anal. Calcd. for  $\text{C}_{16}\text{H}_{16}\text{O}_3$ : C, 74.98; H, 6.29; Found: C, 75.84; H, 5.38 %.

### 1-(Naphthyl)-3-phenylpropan-1-ol (**12**)<sup>1</sup>

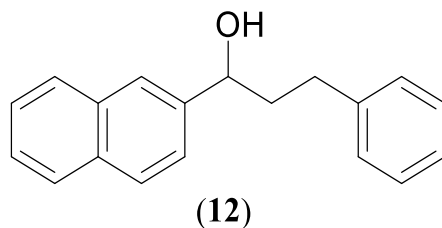

Colorless liquid [0.185 g, 71 % isolated yield (**1b**)]  $^1\text{H}$  NMR ( $\text{CDCl}_3$ , 400 MHz, 25 °C):  $\delta$  ppm, 7.88–7.85 (m, 3H,  $\text{C}_{10}\underline{\text{H}}_7\text{CH}(\text{OH})\text{CH}_2\text{CH}_2\text{C}_6\text{H}_5$ ), 7.80 (br, 1H,  $\text{C}_{10}\underline{\text{H}}_7\text{CH}(\text{OH})\text{CH}_2\text{CH}_2\text{C}_6\text{H}_5$ ), 7.52–7.50 (m, 3H,  $\text{C}_{10}\underline{\text{H}}_7\text{CH}(\text{OH})\text{CH}_2\text{CH}_2\text{C}_6\text{H}_5$ ), 7.39–7.38 (m, 2H,  $\text{C}_{10}\text{H}_7\text{CH}(\text{OH})\text{CH}_2\text{CH}_2\text{C}_6\text{H}_5$ ), 7.35–7.30 (m, 2H,  $\text{C}_{10}\text{H}_7\text{CH}(\text{OH})\text{CH}_2\text{CH}_2\text{C}_6\text{H}_5$ ), 7.24–7.23 (m, 1H,  $\text{C}_{10}\text{H}_7\text{CH}(\text{OH})\text{CH}_2\text{CH}_2\text{C}_6\text{H}_5$ ), 4.88–4.85 (m, 1H,  $\text{C}_{10}\text{H}_7\text{C}\underline{\text{H}}(\text{OH})\text{CH}_2\text{CH}_2\text{C}_6\text{H}_5$ ), 2.84–2.69 (m, 2H,  $\text{C}_{10}\text{H}_7\text{CH}(\text{OH})\text{C}\underline{\text{H}}_2\text{CH}_2\text{C}_6\text{H}_5$ ), 2.29–2.12 (m, 2H,  $\text{C}_{10}\text{H}_7\text{CH}(\text{OH})\text{CH}_2\text{C}\underline{\text{H}}_2\text{C}_6\text{H}_5$ ), 1.96 (br, 1H,  $\text{C}_{10}\text{H}_7\text{CH}(\text{O}\underline{\text{H}})\text{CH}_2\text{CH}_2\text{C}_6\text{H}_5$ ).  $^{13}\text{C}\{^1\text{H}\}$  NMR ( $\text{CDCl}_3$ , 100 MHz, 25 °C):  $\delta$  ppm, 141.8 ( $\text{C}_{10}\text{H}_7\text{CH}(\text{OH})\text{CH}_2\text{CH}_2\text{C}_6\text{H}_5$ ), 140.8 ( $\text{C}_{10}\text{H}_7\text{CH}(\text{OH})\text{CH}_2\text{CH}_2$ -*ipso*- $\text{C}_6\text{H}_5$ ), 133.3 ( $\text{C}_{10}\text{H}_7\text{CH}(\text{OH})\text{CH}_2\text{CH}_2\text{C}_6\text{H}_5$ ), 133.0 ( $\text{C}_{10}\text{H}_7\text{CH}(\text{OH})\text{CH}_2\text{CH}_2\text{C}_6\text{H}_5$ ), 128.6 ( $\text{C}_{10}\text{H}_7\text{CH}(\text{OH})\text{CH}_2\text{CH}_2$ -*m*- $\text{C}_6\text{H}_5$ ), 128.5 ( $\text{C}_{10}\text{H}_7\text{CH}(\text{OH})\text{CH}_2\text{CH}_2$ -*o*- $\text{C}_6\text{H}_5$ ), 128.4 ( $\text{C}_{10}\text{H}_7\text{CH}(\text{OH})\text{CH}_2\text{CH}_2\text{C}_6\text{H}_5$ ), 127.9 ( $\text{C}_{10}\text{H}_7\text{CH}(\text{OH})\text{CH}_2\text{CH}_2\text{C}_6\text{H}_5$ ), 127.7 ( $\text{C}_{10}\text{H}_7\text{CH}(\text{OH})\text{CH}_2\text{CH}_2\text{C}_6\text{H}_5$ ), 127.0 ( $\text{C}_{10}\text{H}_7\text{CH}(\text{OH})\text{CH}_2\text{CH}_2\text{C}_6\text{H}_5$ ), 126.2 ( $\text{C}_{10}\text{H}_7\text{CH}(\text{OH})\text{CH}_2\text{CH}_2\text{C}_6\text{H}_5$ ), 125.9 ( $\text{C}_{10}\text{H}_7\text{CH}(\text{OH})\text{CH}_2\text{CH}_2$ -*p*- $\text{C}_6\text{H}_5$ ), 124.7 ( $\text{C}_{10}\text{H}_7\text{CH}(\text{OH})\text{CH}_2\text{CH}_2\text{C}_6\text{H}_5$ ), 124.1 (*ipso*- $\text{C}_{10}\text{H}_7\text{CH}(\text{OH})\text{CH}_2\text{CH}_2\text{C}_6\text{H}_5$ ), 73.9 ( $\text{C}_{10}\text{H}_7\text{C}\underline{\text{H}}(\text{OH})\text{CH}_2\text{CH}_2\text{C}_6\text{H}_5$ ), 40.3 ( $\text{C}_{10}\text{H}_7\text{CH}(\text{OH})\text{C}\underline{\text{H}}_2\text{CH}_2\text{C}_6\text{H}_5$ ), 32.0 ( $\text{C}_{10}\text{H}_7\text{CH}(\text{OH})\text{CH}_2\text{C}\underline{\text{H}}_2\text{C}_6\text{H}_5$ ). GCMS (ESI):  $[\text{M}]^+ m/z = 262$ . Anal. Calcd. for  $\text{C}_{19}\text{H}_{18}\text{O}$ : C, 86.99; H, 6.92; Found: C, 87.33; H, 7.02 %.

### 1-(4-Choloro phenyl)-3-phenylpropan-1-ol (**13**)<sup>1</sup>

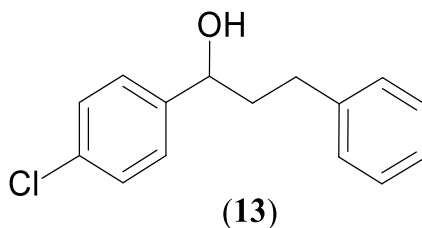

Colorless liquid [0.139 g, 57 % isolated yield (**1b**)]  $^1\text{H}$  NMR ( $\text{CDCl}_3$ , 400 MHz, 25 °C):  $\delta$  ppm, 7.36–7.29 (m, 6H, 4-Cl- $\text{C}_6\text{H}_4\text{CH}(\text{OH})\text{CH}_2\text{CH}_2\text{C}_6\text{H}_5$ ), 7.23–7.20 (m, 3H, 4-Cl- $\text{C}_6\text{H}_4\text{CH}(\text{OH})\text{CH}_2\text{CH}_2\text{C}_6\text{H}_5$ ), 4.71–4.67 (m, 1H, 4-Cl- $\text{C}_6\text{H}_4\text{CH}(\text{OH})\text{CH}_2\text{CH}_2\text{C}_6\text{H}_5$ ), 2.79–2.65 (m, 2H, 4-Cl- $\text{C}_6\text{H}_4\text{CH}(\text{OH})\text{CH}_2\text{CH}_2\text{C}_6\text{H}_5$ ), 2.17–2.01 (m, 2H, 4-Cl- $\text{C}_6\text{H}_4\text{CH}(\text{OH})\text{CH}_2\text{CH}_2\text{C}_6\text{H}_5$ ), 2.00 (d, 1H,  $^3J_{\text{HH}} = 4$  Hz, 4-Cl- $\text{C}_6\text{H}_4\text{CH}(\text{OH})\text{CH}_2\text{CH}_2\text{C}_6\text{H}_5$ ).  $^{13}\text{C}\{^1\text{H}\}$  NMR ( $\text{CDCl}_3$ , 100 MHz, 25 °C):  $\delta$  ppm, 143.0 (4-Cl-*ipso*- $\text{C}_6\text{H}_4\text{CH}(\text{OH})\text{CH}_2\text{CH}_2\text{C}_6\text{H}_5$ ), 141.5 (4-Cl- $\text{C}_6\text{H}_4\text{CH}(\text{OH})\text{CH}_2\text{CH}_2$ -*ipso*- $\text{C}_6\text{H}_5$ ), 133.2 (4-Cl- $\text{C}_6\text{H}_4\text{CH}(\text{OH})\text{CH}_2\text{CH}_2\text{C}_6\text{H}_5$ ), 128.6 (4-Cl-*m*- $\text{C}_6\text{H}_4\text{CH}(\text{OH})\text{CH}_2\text{CH}_2\text{C}_6\text{H}_5$ ), 128.5 (4-Cl- $\text{C}_6\text{H}_4\text{CH}(\text{OH})\text{CH}_2\text{CH}_2$ -*m*- $\text{C}_6\text{H}_5$ ), 128.4 (4-Cl- $\text{C}_6\text{H}_4\text{CH}(\text{OH})\text{CH}_2\text{CH}_2$ -*o*- $\text{C}_6\text{H}_5$ ), 127.3 (4-Cl-*o*- $\text{C}_6\text{H}_4\text{CH}(\text{OH})\text{CH}_2\text{CH}_2\text{C}_6\text{H}_5$ ), 125.9 (4-Cl- $\text{C}_6\text{H}_4\text{CH}(\text{OH})\text{CH}_2\text{CH}_2$ -*p*- $\text{C}_6\text{H}_5$ ), 73.1 (4-Cl- $\text{C}_6\text{H}_4\text{CH}(\text{OH})\text{CH}_2\text{CH}_2\text{C}_6\text{H}_5$ ), 40.5 (4-Cl- $\text{C}_6\text{H}_4\text{CH}(\text{OH})\text{CH}_2\text{CH}_2\text{C}_6\text{H}_5$ ), 31.9 (4-Cl- $\text{C}_6\text{H}_4\text{CH}(\text{OH})\text{CH}_2\text{CH}_2\text{C}_6\text{H}_5$ ). GCMS (ESI):  $[\text{M}]^+$   $m/z = 246$ . Anal. Calcd. for  $\text{C}_{15}\text{H}_{15}\text{ClO}$ : C, 73.02; H, 6.13; Found: C, 72.64; H, 5.39 %.

### 3-(Cyclohexyl)-1-phenylpropan-1-ol (**14**)<sup>1</sup>

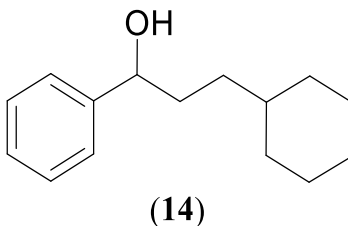

Colorless liquid [0.149 g, 68 % isolated yield (**1b**)]  $^1\text{H}$  NMR ( $\text{CDCl}_3$ , 500 MHz, 25 °C):  $\delta$  ppm, 7.37–7.36 (m, 4H,  $\text{C}_6\text{H}_5\text{CH}(\text{OH})\text{CH}_2\text{CH}_2\text{C}_6\text{H}_{11}$ ), 7.31–7.29 (m, 1H,  $\text{C}_6\text{H}_5\text{CH}(\text{OH})\text{CH}_2\text{CH}_2\text{C}_6\text{H}_{11}$ ), 4.67–4.64 (m, 1H,  $\text{C}_6\text{H}_5\text{CH}(\text{OH})\text{CH}_2\text{CH}_2\text{C}_6\text{H}_{11}$ ), 1.87–1.65 (m, 8H,  $\text{C}_6\text{H}_5\text{CH}(\text{OH})\text{CH}_2\text{CH}_2\text{C}_6\text{H}_{11}$  &  $\text{C}_6\text{H}_5\text{CH}(\text{OH})\text{CH}_2\text{CH}_2\text{C}_6\text{H}_{11}$ ), 1.36 (sept, 1H,  $\text{C}_6\text{H}_5\text{CH}(\text{OH})\text{CH}_2\text{CH}_2\text{C}_6\text{H}_{11}$ ), 1.27–1.13 (m, 4H,  $\text{C}_6\text{H}_5\text{CH}(\text{OH})\text{CH}_2\text{CH}_2\text{C}_6\text{H}_{11}$ ), 0.93–0.85 (m, 1H,  $\text{C}_6\text{H}_5\text{CH}(\text{OH})\text{CH}_2\text{CH}_2\text{C}_6\text{H}_{11}$ ).  $^{13}\text{C}\{^1\text{H}\}$  NMR ( $\text{CDCl}_3$ , 125 MHz, 25 °C):  $\delta$  ppm, 144.9 (*ipso*- $\text{C}_6\text{H}_5\text{CH}(\text{OH})\text{CH}_2\text{CH}_2\text{C}_6\text{H}_{11}$ ), 128.4 (*m*- $\text{C}_6\text{H}_5\text{CH}(\text{OH})\text{CH}_2\text{CH}_2\text{C}_6\text{H}_{11}$ ), 127.4 (*p*- $\text{C}_6\text{H}_5\text{CH}(\text{OH})\text{CH}_2\text{CH}_2\text{C}_6\text{H}_{11}$ ), 125.9 (*o*- $\text{C}_6\text{H}_5\text{CH}(\text{OH})\text{CH}_2\text{CH}_2\text{C}_6\text{H}_{11}$ ), 75.1 ( $\text{C}_6\text{H}_5\text{CH}(\text{OH})\text{CH}_2\text{CH}_2\text{C}_6\text{H}_{11}$ ), 37.6 ( $\text{C}_6\text{H}_5\text{CH}(\text{OH})\text{CH}_2\text{CH}_2\text{C}_6\text{H}_{11}$ ), 36.4 ( $\text{C}_6\text{H}_5\text{CH}(\text{OH})\text{CH}_2\text{CH}_2\text{C}_6\text{H}_{11}$ ), 33.4 ( $\text{C}_6\text{H}_5\text{CH}(\text{OH})\text{CH}_2\text{CH}_2\text{C}_6\text{H}_{11}$ ), 33.4 ( $\text{C}_6\text{H}_5\text{CH}(\text{OH})\text{CH}_2\text{CH}_2\text{C}_6\text{H}_{11}$ ), 33.3 ( $\text{C}_6\text{H}_5\text{CH}(\text{OH})\text{CH}_2\text{CH}_2\text{C}_6\text{H}_{11}$ ), 36.6 ( $\text{C}_6\text{H}_5\text{CH}(\text{OH})\text{CH}_2\text{CH}_2\text{C}_6\text{H}_{11}$ ), 26.3 ( $\text{C}_6\text{H}_5\text{CH}(\text{OH})\text{CH}_2\text{CH}_2\text{C}_6\text{H}_{11}$ ). GCMS (ESI):  $[\text{M}]^+ m/z = 218$ .  
 Anal. Calcd. for  $\text{C}_{15}\text{H}_{22}\text{O}$ : C, 82.52; H, 10.16; Found: C, 81.96; H, 9.70 %.

### 3-(Cyclopentyl)-1-phenylpropan-1-ol (**15**)<sup>1</sup>

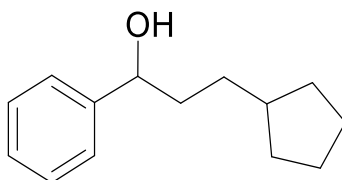

(**15**)

Colorless liquid [0.138 g, 67 % isolated yield (**1b**)]  $^1\text{H}$  NMR ( $\text{CDCl}_3$ , 400 MHz, 25 °C):  $\delta$  ppm, 7.37–7.36 (m, 4H,  $\text{C}_6\text{H}_5\text{CH}(\text{OH})\text{CH}_2\text{CH}_2\text{C}_5\text{H}_9$ ), 7.32–7.28 (m, 1H,  $\text{C}_6\text{H}_5\text{CH}(\text{OH})\text{CH}_2\text{CH}_2\text{C}_5\text{H}_9$ ), 4.68–4.65 (m, 1H,  $\text{C}_6\text{H}_5\text{CH}(\text{OH})\text{CH}_2\text{CH}_2\text{C}_5\text{H}_9$ ), 1.87–1.72 (m, 6H,  $\text{C}_6\text{H}_5\text{CH}(\text{OH})\text{CH}_2\text{CH}_2\text{C}_5\text{H}_9$ ), 1.62–1.57 (m, 2H,  $\text{C}_6\text{H}_5\text{CH}(\text{OH})\text{CH}_2\text{CH}_2\text{C}_5\text{H}_9$ ), 1.53–1.43 (m, 2H,  $\text{C}_6\text{H}_5\text{CH}(\text{OH})\text{CH}_2\text{CH}_2\text{C}_5\text{H}_9$ ),



1.32-1.26 (m, 1H, C<sub>6</sub>H<sub>5</sub>CH(OH)CH<sub>2</sub>CH<sub>2</sub>C<sub>5</sub>H<sub>9</sub>), 1.27-1.13 (m, 4H, C<sub>6</sub>H<sub>5</sub>CH(OH)CH<sub>2</sub>CH<sub>2</sub>C<sub>5</sub>H<sub>9</sub>),  
 1.09-1.06 (m, 1H, C<sub>6</sub>H<sub>5</sub>CH(OH)CH<sub>2</sub>CH<sub>2</sub>C<sub>5</sub>H<sub>9</sub>). <sup>13</sup>C{<sup>1</sup>H} NMR (CDCl<sub>3</sub>, 100 MHz, 25 °C): δ ppm,  
 144.9 (*ipso*-C<sub>6</sub>H<sub>5</sub>CH(OH)CH<sub>2</sub>CH<sub>2</sub>C<sub>5</sub>H<sub>9</sub>), 128.4 (*m*-C<sub>6</sub>H<sub>5</sub>CH(OH)CH<sub>2</sub>CH<sub>2</sub>C<sub>5</sub>H<sub>9</sub>), 127.5 (*p*-  
 C<sub>6</sub>H<sub>5</sub>CH(OH)CH<sub>2</sub>CH<sub>2</sub>C<sub>5</sub>H<sub>9</sub>), 125.9 (*o*-C<sub>6</sub>H<sub>5</sub>CH(OH)CH<sub>2</sub>CH<sub>2</sub>C<sub>5</sub>H<sub>9</sub>), 74.9  
 (C<sub>6</sub>H<sub>5</sub>CH(OH)CH<sub>2</sub>CH<sub>2</sub>C<sub>5</sub>H<sub>9</sub>), 40.1 (C<sub>6</sub>H<sub>5</sub>CH(OH)CH<sub>2</sub>CH<sub>2</sub>C<sub>5</sub>H<sub>9</sub>), 38.3  
 (C<sub>6</sub>H<sub>5</sub>CH(OH)CH<sub>2</sub>CH<sub>2</sub>C<sub>5</sub>H<sub>9</sub>), 32.7 (C<sub>6</sub>H<sub>5</sub>CH(OH)CH<sub>2</sub>CH<sub>2</sub>C<sub>5</sub>H<sub>9</sub>), 32.6  
 (C<sub>6</sub>H<sub>5</sub>CH(OH)CH<sub>2</sub>CH<sub>2</sub>C<sub>5</sub>H<sub>9</sub>), 32.2 (C<sub>6</sub>H<sub>5</sub>CH(OH)CH<sub>2</sub>CH<sub>2</sub>C<sub>5</sub>H<sub>9</sub>), 25.1  
 (C<sub>6</sub>H<sub>5</sub>CH(OH)CH<sub>2</sub>CH<sub>2</sub>C<sub>5</sub>H<sub>9</sub>). GCMS (ESI): [M]<sup>+</sup> *m/z* = 186. Calcd. for C<sub>14</sub>H<sub>20</sub>O: C, 82.30; H,  
 9.87; Found: C, 81.67; H, 8.98 %.

### Synthesis of 2-Phenylchroman (16)<sup>2</sup>

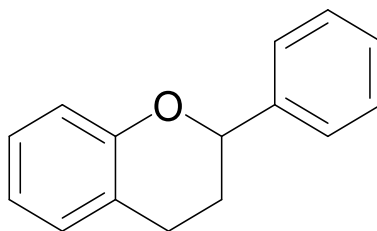

(16)

Colorless dense liquid [0.054 g, 26 % isolated yield (1b)]. <sup>1</sup>H NMR (CDCl<sub>3</sub>, 500 MHz, 25 °C): δ  
 ppm, 7.46 (d, 2H, <sup>3</sup>J<sub>HH</sub> = 8 Hz, C<sub>6</sub>H<sub>4</sub>CH<sub>2</sub>CH<sub>2</sub>CH(O)C<sub>6</sub>H<sub>5</sub>), 7.42 (t, 2H, <sup>3</sup>J<sub>HH</sub> = 8 Hz,  
 C<sub>6</sub>H<sub>4</sub>CH<sub>2</sub>CH<sub>2</sub>CH(O)C<sub>6</sub>H<sub>5</sub>), 7.36–7.35 (m, 1H, C<sub>6</sub>H<sub>4</sub>CH<sub>2</sub>CH<sub>2</sub>CH(O)C<sub>6</sub>H<sub>5</sub>), 7.17–7.11 (m, 2H,  
 C<sub>6</sub>H<sub>4</sub>CH<sub>2</sub>CH<sub>2</sub>CH(O)C<sub>6</sub>H<sub>5</sub>), 6.95–6.89 (m, 2H, C<sub>6</sub>H<sub>4</sub>CH<sub>2</sub>CH<sub>2</sub>CH(O)C<sub>6</sub>H<sub>5</sub>), 5.10 (dd, 1H, <sup>3</sup>J<sub>HH</sub> = 8  
 Hz, <sup>1</sup>J<sub>HH</sub> = 2 Hz, C<sub>6</sub>H<sub>4</sub>CH<sub>2</sub>CH<sub>2</sub>CH(O)C<sub>6</sub>H<sub>5</sub>), 3.06–2.99 (m, 1H, C<sub>6</sub>H<sub>4</sub>CH<sub>2</sub>CH<sub>2</sub>CH(O)C<sub>6</sub>H<sub>5</sub>),  
 2.85–2.80 (m, 1H, C<sub>6</sub>H<sub>4</sub>CH<sub>2</sub>CH<sub>2</sub>CH(O)C<sub>6</sub>H<sub>5</sub>), 2.27–2.22 (m, 1H, C<sub>6</sub>H<sub>4</sub>CH<sub>2</sub>CH<sub>2</sub>CH(O)C<sub>6</sub>H<sub>5</sub>),  
 2.16–2.08 (m, 1H, C<sub>6</sub>H<sub>4</sub>CH<sub>2</sub>CH<sub>2</sub>CH(O)C<sub>6</sub>H<sub>5</sub>). <sup>13</sup>C{<sup>1</sup>H} NMR (CDCl<sub>3</sub>, 125 MHz, 25 °C): δ ppm,  
 155.1 (C<sub>6</sub>H<sub>4</sub>CH<sub>2</sub>CH<sub>2</sub>CH(O)C<sub>6</sub>H<sub>5</sub>), 141.7 (C<sub>6</sub>H<sub>4</sub>CH<sub>2</sub>CH<sub>2</sub>CH(O)-*ipso*-C<sub>6</sub>H<sub>5</sub>), 129.5  
 (C<sub>6</sub>H<sub>4</sub>CH<sub>2</sub>CH<sub>2</sub>CH(O)C<sub>6</sub>H<sub>5</sub>), 128.5 (C<sub>6</sub>H<sub>4</sub>CH<sub>2</sub>CH<sub>2</sub>CH(O)-*m*-C<sub>6</sub>H<sub>5</sub>), 127.8 (C<sub>6</sub>H<sub>4</sub>CH<sub>2</sub>CH<sub>2</sub>CH(O)-*o*-

$\underline{C}_6H_5$ ), 127.3 ( $\underline{C}_6H_4CH_2CH_2CH(O)C_6H_5$ ), 126.0 ( $\underline{C}_6H_4CH_2CH_2CH(O)-p-\underline{C}_6H_5$ ), 121.8  
 $(\underline{C}_6H_4CH_2CH_2CH(O)C_6H_5)$ , 120.3 ( $\underline{C}_6H_4CH_2CH_2CH(O)C_6H_5$ ), 116.9 ( $\underline{C}_6H_4CH_2CH_2CH(O)C_6H_5$ ),  
 77.7 ( $\underline{C}_6H_4CH_2CH_2CH(O)C_6H_5$ ), 29.9 ( $\underline{C}_6H_4CH_2CH_2CH(O)C_6H_5$ ), 25.1  
 $(\underline{C}_6H_4CH_2CH_2CH(O)C_6H_5)$ . GCMS (ESI):  $[M]^+$   $m/z = 210$ . Anal. Calcd. for  $C_{15}H_{14}O$ : C, 85.68;  
 H, 6.71; Found: C, 84.82; H, 6.09 %.

## 2-(Naphthalen-2-yl)chroman (17)<sup>2</sup>

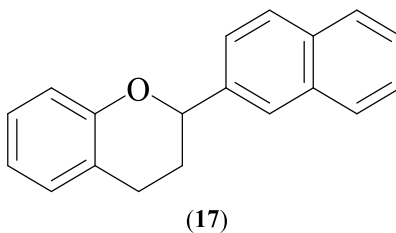

Yellow Solid [0.103 g, 40 % isolated yield (**1b**)].  $^1H$  NMR ( $CDCl_3$ , 400 MHz, 25 °C):  $\delta$  ppm,  
 7.92–7.86 (m, 4H,  $\underline{C}_6H_4CH_2CH_2CH(O)C_{10}H_7$ ), 7.58–7.48 (m, 3H,  $\underline{C}_6H_4CH_2CH_2CH(O)C_{10}H_7$ ),  
 7.20–7.13 (m, 2H,  $\underline{C}_6H_4CH_2CH_2CH(O)C_{10}H_7$ ), 7.00–6.98 (m, 1H,  $\underline{C}_6H_4CH_2CH_2CH(O)C_{10}H_7$ ),  
 6.92 (td, 1H,  $^3J_{HH} = 8$  Hz,  $^1J_{HH} = 2$  Hz,  $\underline{C}_6H_4CH_2CH_2CH(O)C_{10}H_7$ ), 5.26 (dd, 1H,  $^3J_{HH} = 8$  Hz,  
 $^1J_{HH} = 2$  Hz,  $\underline{C}_6H_4CH_2CH_2CH(O)C_{10}H_7$ ), 3.11–3.03 (m, 1H,  $\underline{C}_6H_4CH_2CH_2CH(O)C_{10}H_7$ ),  
 2.89–2.83 (m, 1H,  $\underline{C}_6H_4CH_2CH_2CH(O)C_{10}H_7$ ), 2.35–2.16 (m, 1H,  $\underline{C}_6H_4CH_2CH_2CH(O)C_{10}H_7$ ).  
 $^{13}C\{^1H\}$  NMR ( $CDCl_3$ , 100 MHz, 25 °C):  $\delta$  ppm, 155.1 ( $\underline{C}_6H_4CH_2CH_2CH(O)C_{10}H_7$ ), 139.1  
 $(\underline{C}_6H_4CH_2CH_2CH(O)C_{10}H_7)$ , 133.3 ( $\underline{C}_6H_4CH_2CH_2CH(O)C_{10}H_7$ ), 133.0  
 $(\underline{C}_6H_4CH_2CH_2CH(O)C_{10}H_7)$ , 129.5 ( $\underline{C}_6H_4CH_2CH_2CH(O)C_{10}H_7$ ), 128.3  
 $(\underline{C}_6H_4CH_2CH_2CH(O)C_{10}H_7)$ , 128.0 ( $\underline{C}_6H_4CH_2CH_2CH(O)C_{10}H_7$ ), 127.7  
 $(\underline{C}_6H_4CH_2CH_2CH(O)C_{10}H_7)$ , 127.4 ( $\underline{C}_6H_4CH_2CH_2CH(O)C_{10}H_7$ ), 126.1  
 $(\underline{C}_6H_4CH_2CH_2CH(O)C_{10}H_7)$ , 125.9 ( $\underline{C}_6H_4CH_2CH_2CH(O)C_{10}H_7$ ), 124.8  
 $(\underline{C}_6H_4CH_2CH_2CH(O)C_{10}H_7)$ , 124.0 ( $\underline{C}_6H_4CH_2CH_2CH(O)C_{10}H_7$ ), 121.8 ( $\underline{C}_6H_4CH_2CH_2CH(O)-$

*ipso*-C<sub>10</sub>H<sub>7</sub>), 120.4 (C<sub>6</sub>H<sub>4</sub>CH<sub>2</sub>CH<sub>2</sub>CH(O)C<sub>10</sub>H<sub>7</sub>), 116.9 (C<sub>6</sub>H<sub>4</sub>CH<sub>2</sub>CH<sub>2</sub>CH(O)C<sub>10</sub>H<sub>7</sub>), 77.8 (C<sub>6</sub>H<sub>4</sub>CH<sub>2</sub>CH<sub>2</sub>CH(O)C<sub>10</sub>H<sub>7</sub>), 29.9 (C<sub>6</sub>H<sub>4</sub>CH<sub>2</sub>CH<sub>2</sub>CH(O)C<sub>10</sub>H<sub>7</sub>), 25.1 (C<sub>6</sub>H<sub>4</sub>CH<sub>2</sub>CH<sub>2</sub>CH(O)C<sub>10</sub>H<sub>7</sub>). GCMS (ESI): [M]<sup>+</sup> *m/z* = 260. Anal. Calcd. for C<sub>19</sub>H<sub>16</sub>O: C, 87.66; H, 6.20; Found: C, 87.33; H, 7.02 %.

## 2-(Benzo[1,3]dioxol-5-yl)chroman (18)<sup>2</sup>

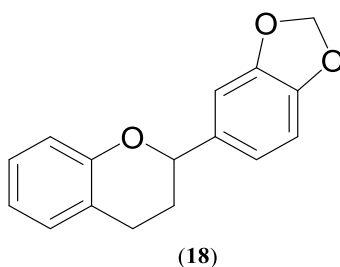

Colorless dense liquid [0.079 g, 32 % isolated yield (**1b**)]. <sup>1</sup>H NMR (CDCl<sub>3</sub>, 400 MHz, 25 °C): δ ppm, 7.16–7.10 (m, 2H, C<sub>6</sub>H<sub>4</sub>CH<sub>2</sub>CH<sub>2</sub>CH(O)C<sub>6</sub>H<sub>3</sub>OCH<sub>2</sub>O), 6.97–6.88 (m, 4H, C<sub>6</sub>H<sub>4</sub>CH<sub>2</sub>CH<sub>2</sub>CH(O)C<sub>6</sub>H<sub>3</sub>OCH<sub>2</sub>O), 6.85–6.83 (m, 1H, C<sub>6</sub>H<sub>4</sub>CH<sub>2</sub>CH<sub>2</sub>CH(O)C<sub>6</sub>H<sub>3</sub>OCH<sub>2</sub>O), 5.99 (s, 2H, C<sub>6</sub>H<sub>4</sub>CH<sub>2</sub>CH<sub>2</sub>CH(O)C<sub>6</sub>H<sub>3</sub>OCH<sub>2</sub>O), 4.99 (dd, 1H, <sup>3</sup>J<sub>HH</sub> = 8 Hz, <sup>1</sup>J<sub>HH</sub> = 2 Hz, C<sub>6</sub>H<sub>4</sub>CH<sub>2</sub>CH<sub>2</sub>CH(O)C<sub>6</sub>H<sub>3</sub>OCH<sub>2</sub>O), 3.06–2.97 (m, 1H, C<sub>6</sub>H<sub>4</sub>CH<sub>2</sub>CH<sub>2</sub>CH(O)C<sub>6</sub>H<sub>3</sub>OCH<sub>2</sub>O), 2.86–2.80 (m, 1H, C<sub>6</sub>H<sub>4</sub>CH<sub>2</sub>CH<sub>2</sub>CH(O)C<sub>6</sub>H<sub>3</sub>OCH<sub>2</sub>O), 2.23–2.05 (m, 2H, C<sub>6</sub>H<sub>4</sub>CH<sub>2</sub>CH<sub>2</sub>CH(O)C<sub>6</sub>H<sub>3</sub>OCH<sub>2</sub>O). <sup>13</sup>C{<sup>1</sup>H} NMR (CDCl<sub>3</sub>, 100 MHz, 25 °C): δ ppm, 155.1 (C<sub>6</sub>H<sub>4</sub>CH<sub>2</sub>CH<sub>2</sub>CH(O)C<sub>6</sub>H<sub>3</sub>OCH<sub>2</sub>O), 147.8 (C<sub>6</sub>H<sub>4</sub>CH<sub>2</sub>CH<sub>2</sub>CH(O)C<sub>6</sub>H<sub>3</sub>OCH<sub>2</sub>O), 147.2 (C<sub>6</sub>H<sub>4</sub>CH<sub>2</sub>CH<sub>2</sub>CH(O)C<sub>6</sub>H<sub>3</sub>OCH<sub>2</sub>O), 135.7 (C<sub>6</sub>H<sub>4</sub>CH<sub>2</sub>CH<sub>2</sub>CH(O)C<sub>6</sub>H<sub>3</sub>OCH<sub>2</sub>O), 129.5 (C<sub>6</sub>H<sub>4</sub>CH<sub>2</sub>CH<sub>2</sub>CH(O)C<sub>6</sub>H<sub>3</sub>OCH<sub>2</sub>O), 127.3 (C<sub>6</sub>H<sub>4</sub>CH<sub>2</sub>CH<sub>2</sub>CH(O)C<sub>6</sub>H<sub>3</sub>OCH<sub>2</sub>O), 121.7 (C<sub>6</sub>H<sub>4</sub>CH<sub>2</sub>CH<sub>2</sub>CH(O)C<sub>6</sub>H<sub>3</sub>OCH<sub>2</sub>O), 120.3 (C<sub>6</sub>H<sub>4</sub>CH<sub>2</sub>CH<sub>2</sub>CH(O)C<sub>6</sub>H<sub>3</sub>OCH<sub>2</sub>O), 119.5 (C<sub>6</sub>H<sub>4</sub>CH<sub>2</sub>CH<sub>2</sub>CH(O)C<sub>6</sub>H<sub>3</sub>OCH<sub>2</sub>O), 116.9 (C<sub>6</sub>H<sub>4</sub>CH<sub>2</sub>CH<sub>2</sub>CH(O)C<sub>6</sub>H<sub>3</sub>OCH<sub>2</sub>O), 108.2 (C<sub>6</sub>H<sub>4</sub>CH<sub>2</sub>CH<sub>2</sub>CH(O)C<sub>6</sub>H<sub>3</sub>OCH<sub>2</sub>O), 106.7 (C<sub>6</sub>H<sub>4</sub>CH<sub>2</sub>CH<sub>2</sub>CH(O)C<sub>6</sub>H<sub>3</sub>OCH<sub>2</sub>O), 101.1 (C<sub>6</sub>H<sub>4</sub>CH<sub>2</sub>CH<sub>2</sub>CH(O)C<sub>6</sub>H<sub>3</sub>OCH<sub>2</sub>O).

(C<sub>6</sub>H<sub>4</sub>CH<sub>2</sub>CH<sub>2</sub>CH(O)C<sub>6</sub>H<sub>3</sub>OCH<sub>2</sub>O), 77.6 (C<sub>6</sub>H<sub>4</sub>CH<sub>2</sub>CH<sub>2</sub>CH(O)C<sub>6</sub>H<sub>3</sub>OCH<sub>2</sub>O), 29.9  
 (C<sub>6</sub>H<sub>4</sub>CH<sub>2</sub>CH<sub>2</sub>CH(O)C<sub>6</sub>H<sub>3</sub>OCH<sub>2</sub>O), 25.1 (C<sub>6</sub>H<sub>4</sub>CH<sub>2</sub>CH<sub>2</sub>CH(O)C<sub>6</sub>H<sub>3</sub>OCH<sub>2</sub>O). GCMS (ESI): [M]<sup>+</sup>  
*m/z* = 254. Anal. Calcd. for C<sub>16</sub>H<sub>14</sub>O<sub>3</sub>: C, 75.58; H, 5.55; Found: C, 76.00; H, 4.89 %.

## 2-(4-Tolyl)chroman (19)<sup>2</sup>

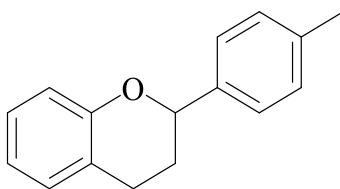

(19)

Colorless solid [0.067 g, 30 % isolated yield (**1b**)] <sup>1</sup>H NMR (CDCl<sub>3</sub>, 400 MHz, 25 °C): δ ppm,  
 7.34 (d, 2H, <sup>3</sup>J<sub>HH</sub> = 8 Hz, C<sub>6</sub>H<sub>4</sub>CH<sub>2</sub>CH<sub>2</sub>CH(O)C<sub>6</sub>H<sub>4</sub>CH<sub>3</sub>), 7.21 (d, 2H, <sup>3</sup>J<sub>HH</sub> = 8 Hz,  
 C<sub>6</sub>H<sub>4</sub>CH<sub>2</sub>CH<sub>2</sub>CH(O)C<sub>6</sub>H<sub>4</sub>CH<sub>3</sub>), 7.15–7.09 (m, 2H, C<sub>6</sub>H<sub>4</sub>CH<sub>2</sub>CH<sub>2</sub>CH(O)C<sub>6</sub>H<sub>4</sub>CH<sub>3</sub>), 6.93–6.89 (m,  
 2H, C<sub>6</sub>H<sub>4</sub>CH<sub>2</sub>CH<sub>2</sub>CH(O)C<sub>6</sub>H<sub>4</sub>CH<sub>3</sub>), 5.07–5.04 (m, 1H, C<sub>6</sub>H<sub>4</sub>CH<sub>2</sub>CH<sub>2</sub>CH(O)C<sub>6</sub>H<sub>4</sub>CH<sub>3</sub>), 3.05–2.97  
 (m, 1H, C<sub>6</sub>H<sub>4</sub>CH<sub>2</sub>CH<sub>2</sub>CH(O)C<sub>6</sub>H<sub>4</sub>CH<sub>3</sub>), 2.85–2.79 (m, 1H, C<sub>6</sub>H<sub>4</sub>CH<sub>2</sub>CH<sub>2</sub>CH(O)C<sub>6</sub>H<sub>4</sub>CH<sub>3</sub>), 2.38  
 (s, 3H, C<sub>6</sub>H<sub>4</sub>CH<sub>2</sub>CH<sub>2</sub>CH(O)C<sub>6</sub>H<sub>4</sub>CH<sub>3</sub>), 2.24–2.06 (m, 2H, C<sub>6</sub>H<sub>4</sub>CH<sub>2</sub>CH<sub>2</sub>CH(O)C<sub>6</sub>H<sub>4</sub>CH<sub>3</sub>).  
<sup>13</sup>C{<sup>1</sup>H} NMR (CDCl<sub>3</sub>, 400 MHz, 25 °C): δ ppm, 155.2 (C<sub>6</sub>H<sub>4</sub>CH<sub>2</sub>CH<sub>2</sub>CH(O)C<sub>6</sub>H<sub>4</sub>CH<sub>3</sub>), 138.7  
 (C<sub>6</sub>H<sub>4</sub>CH<sub>2</sub>CH<sub>2</sub>CH(O)-*ipso*-C<sub>6</sub>H<sub>4</sub>CH<sub>3</sub>), 137.5 (C<sub>6</sub>H<sub>4</sub>CH<sub>2</sub>CH<sub>2</sub>CH(O)-*p*-C<sub>6</sub>H<sub>4</sub>CH<sub>3</sub>), 129.5  
 (C<sub>6</sub>H<sub>4</sub>CH<sub>2</sub>CH<sub>2</sub>CH(O)C<sub>6</sub>H<sub>4</sub>CH<sub>3</sub>), 129.1 (C<sub>6</sub>H<sub>4</sub>CH<sub>2</sub>CH<sub>2</sub>CH(O)-*m*-C<sub>6</sub>H<sub>4</sub>CH<sub>3</sub>), 127.3  
 (C<sub>6</sub>H<sub>4</sub>CH<sub>2</sub>CH<sub>2</sub>CH(O)-*o*-C<sub>6</sub>H<sub>4</sub>CH<sub>3</sub>), 125.9 (C<sub>6</sub>H<sub>4</sub>CH<sub>2</sub>CH<sub>2</sub>CH(O)C<sub>6</sub>H<sub>4</sub>CH<sub>3</sub>), 121.8  
 (C<sub>6</sub>H<sub>4</sub>CH<sub>2</sub>CH<sub>2</sub>CH(O)C<sub>6</sub>H<sub>4</sub>CH<sub>3</sub>), 120.2 (C<sub>6</sub>H<sub>4</sub>CH<sub>2</sub>CH<sub>2</sub>CH(O)C<sub>6</sub>H<sub>4</sub>CH<sub>3</sub>), 116.9  
 (C<sub>6</sub>H<sub>4</sub>CH<sub>2</sub>CH<sub>2</sub>CH(O)C<sub>6</sub>H<sub>4</sub>CH<sub>3</sub>), 77.6 (C<sub>6</sub>H<sub>4</sub>CH<sub>2</sub>CH<sub>2</sub>CH(O)C<sub>6</sub>H<sub>4</sub>CH<sub>3</sub>), 29.8  
 (C<sub>6</sub>H<sub>4</sub>CH<sub>2</sub>CH<sub>2</sub>CH(O)C<sub>6</sub>H<sub>4</sub>CH<sub>3</sub>), 25.1 (C<sub>6</sub>H<sub>4</sub>CH<sub>2</sub>CH<sub>2</sub>CH(O)C<sub>6</sub>H<sub>4</sub>CH<sub>3</sub>), 21.1

(C<sub>6</sub>H<sub>4</sub>CH<sub>2</sub>CH<sub>2</sub>CH(O)C<sub>6</sub>H<sub>4</sub>CH<sub>3</sub>). GCMS (ESI): [M]<sup>+</sup> *m/z* = 224. Anal. Calcd. for C<sub>16</sub>H<sub>16</sub>O: C, 85.68; H, 7.19; Found: C, 84.86; H, 8.16 %.

## 2-(2-Methoxyphenyl)chroman (20)<sup>2</sup>

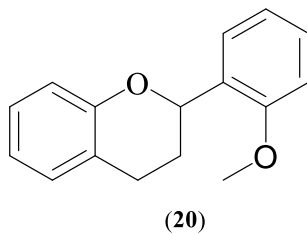

Colorless solid [0.088 g, 37 % isolated yield (**1b**)] <sup>1</sup>H NMR (CDCl<sub>3</sub>, 400 MHz, 25 °C): δ ppm, 7.52 (dd, 1H, <sup>3</sup>J<sub>HH</sub> = 8 Hz, <sup>1</sup>J<sub>HH</sub> = 2 Hz, C<sub>6</sub>H<sub>4</sub>CH<sub>2</sub>CH<sub>2</sub>CH(O)C<sub>6</sub>H<sub>4</sub>OCH<sub>3</sub>), 7.33–7.29 (m, 1H, C<sub>6</sub>H<sub>4</sub>CH<sub>2</sub>CH<sub>2</sub>CH(O)C<sub>6</sub>H<sub>4</sub>OCH<sub>3</sub>), 7.16–7.10 (m, 2H, C<sub>6</sub>H<sub>4</sub>CH<sub>2</sub>CH<sub>2</sub>CH(O)C<sub>6</sub>H<sub>4</sub>OCH<sub>3</sub>), 7.02 (t, 1H, <sup>3</sup>J<sub>HH</sub> = 8 Hz, C<sub>6</sub>H<sub>4</sub>CH<sub>2</sub>CH<sub>2</sub>CH(O)C<sub>6</sub>H<sub>4</sub>OCH<sub>3</sub>), 6.95–6.87 (m, 3H, C<sub>6</sub>H<sub>4</sub>CH<sub>2</sub>CH<sub>2</sub>CH(O)C<sub>6</sub>H<sub>4</sub>OCH<sub>3</sub>), 5.47 (dd, 1H, <sup>3</sup>J<sub>HH</sub> = 8 Hz, <sup>1</sup>J<sub>HH</sub> = 2 Hz, C<sub>6</sub>H<sub>4</sub>CH<sub>2</sub>CH<sub>2</sub>CH(O)C<sub>6</sub>H<sub>4</sub>OCH<sub>3</sub>), 3.87 (s, 3H, C<sub>6</sub>H<sub>4</sub>CH<sub>2</sub>CH<sub>2</sub>CH(O)C<sub>6</sub>H<sub>4</sub>OCH<sub>3</sub>), 3.06–2.98 (m, 1H, C<sub>6</sub>H<sub>4</sub>CH<sub>2</sub>CH<sub>2</sub>CH(O)C<sub>6</sub>H<sub>4</sub>OCH<sub>3</sub>), 2.81–2.75 (m, 1H, C<sub>6</sub>H<sub>4</sub>CH<sub>2</sub>CH<sub>2</sub>CH(O)C<sub>6</sub>H<sub>4</sub>OCH<sub>3</sub>), 2.30–2.24 (m, 1H, C<sub>6</sub>H<sub>4</sub>CH<sub>2</sub>CH<sub>2</sub>CH(O)C<sub>6</sub>H<sub>4</sub>OCH<sub>3</sub>), 2.03–1.93 (m, 1H, C<sub>6</sub>H<sub>4</sub>CH<sub>2</sub>CH<sub>2</sub>CH(O)C<sub>6</sub>H<sub>4</sub>OCH<sub>3</sub>). <sup>13</sup>C{<sup>1</sup>H} NMR (CDCl<sub>3</sub>, 100 MHz, 25 °C): δ ppm, 155.9 (C<sub>6</sub>H<sub>4</sub>CH<sub>2</sub>CH<sub>2</sub>CH(O)C<sub>6</sub>H<sub>4</sub>OCH<sub>3</sub>), 155.5 (C<sub>6</sub>H<sub>4</sub>CH<sub>2</sub>CH<sub>2</sub>CH(O)C<sub>6</sub>H<sub>4</sub>OCH<sub>3</sub>), 130.2 (C<sub>6</sub>H<sub>4</sub>CH<sub>2</sub>CH<sub>2</sub>CH(O)C<sub>6</sub>H<sub>4</sub>OCH<sub>3</sub>), 129.5 (C<sub>6</sub>H<sub>4</sub>CH<sub>2</sub>CH<sub>2</sub>CH(O)C<sub>6</sub>H<sub>4</sub>OCH<sub>3</sub>), 128.4 (C<sub>6</sub>H<sub>4</sub>CH<sub>2</sub>CH<sub>2</sub>CH(O)C<sub>6</sub>H<sub>4</sub>OCH<sub>3</sub>), 127.2 (C<sub>6</sub>H<sub>4</sub>CH<sub>2</sub>CH<sub>2</sub>CH(O)-*p*-C<sub>6</sub>H<sub>4</sub>OCH<sub>3</sub>), 126.4 (C<sub>6</sub>H<sub>4</sub>CH<sub>2</sub>CH<sub>2</sub>CH(O)C<sub>6</sub>H<sub>4</sub>OCH<sub>3</sub>), 122.2 (C<sub>6</sub>H<sub>4</sub>CH<sub>2</sub>CH<sub>2</sub>CH(O)-*ipso*-C<sub>6</sub>H<sub>4</sub>OCH<sub>3</sub>), 120.7 (C<sub>6</sub>H<sub>4</sub>CH<sub>2</sub>CH<sub>2</sub>CH(O)C<sub>6</sub>H<sub>4</sub>OCH<sub>3</sub>), 120.0 (C<sub>6</sub>H<sub>4</sub>CH<sub>2</sub>CH<sub>2</sub>CH(O)C<sub>6</sub>H<sub>4</sub>OCH<sub>3</sub>), 116.8 (C<sub>6</sub>H<sub>4</sub>CH<sub>2</sub>CH<sub>2</sub>CH(O)C<sub>6</sub>H<sub>4</sub>OCH<sub>3</sub>), 110.3 (C<sub>6</sub>H<sub>4</sub>CH<sub>2</sub>CH<sub>2</sub>CH(O)C<sub>6</sub>H<sub>4</sub>OCH<sub>3</sub>), 72.3 (C<sub>6</sub>H<sub>4</sub>CH<sub>2</sub>CH<sub>2</sub>CH(O)C<sub>6</sub>H<sub>4</sub>OCH<sub>3</sub>).

(C<sub>6</sub>H<sub>4</sub>CH<sub>2</sub>CH<sub>2</sub>CH(O)C<sub>6</sub>H<sub>4</sub>OCH<sub>3</sub>), 55.4 (C<sub>6</sub>H<sub>4</sub>CH<sub>2</sub>CH<sub>2</sub>CH(O)C<sub>6</sub>H<sub>4</sub>OCH<sub>3</sub>), 28.5  
(C<sub>6</sub>H<sub>4</sub>CH<sub>2</sub>CH<sub>2</sub>CH(O)C<sub>6</sub>H<sub>4</sub>OCH<sub>3</sub>), 25.2 (C<sub>6</sub>H<sub>4</sub>CH<sub>2</sub>CH<sub>2</sub>CH(O)C<sub>6</sub>H<sub>4</sub>OCH<sub>3</sub>). GCMS (ESI): [M]<sup>+</sup>  
*m/z* = 240. Anal. Calcd. for C<sub>16</sub>H<sub>14</sub>O<sub>2</sub>: C, 79.97; H, 6.71; Found: C, 79.77; H, 7.15 %.

PG-AK-4-201-A-1H

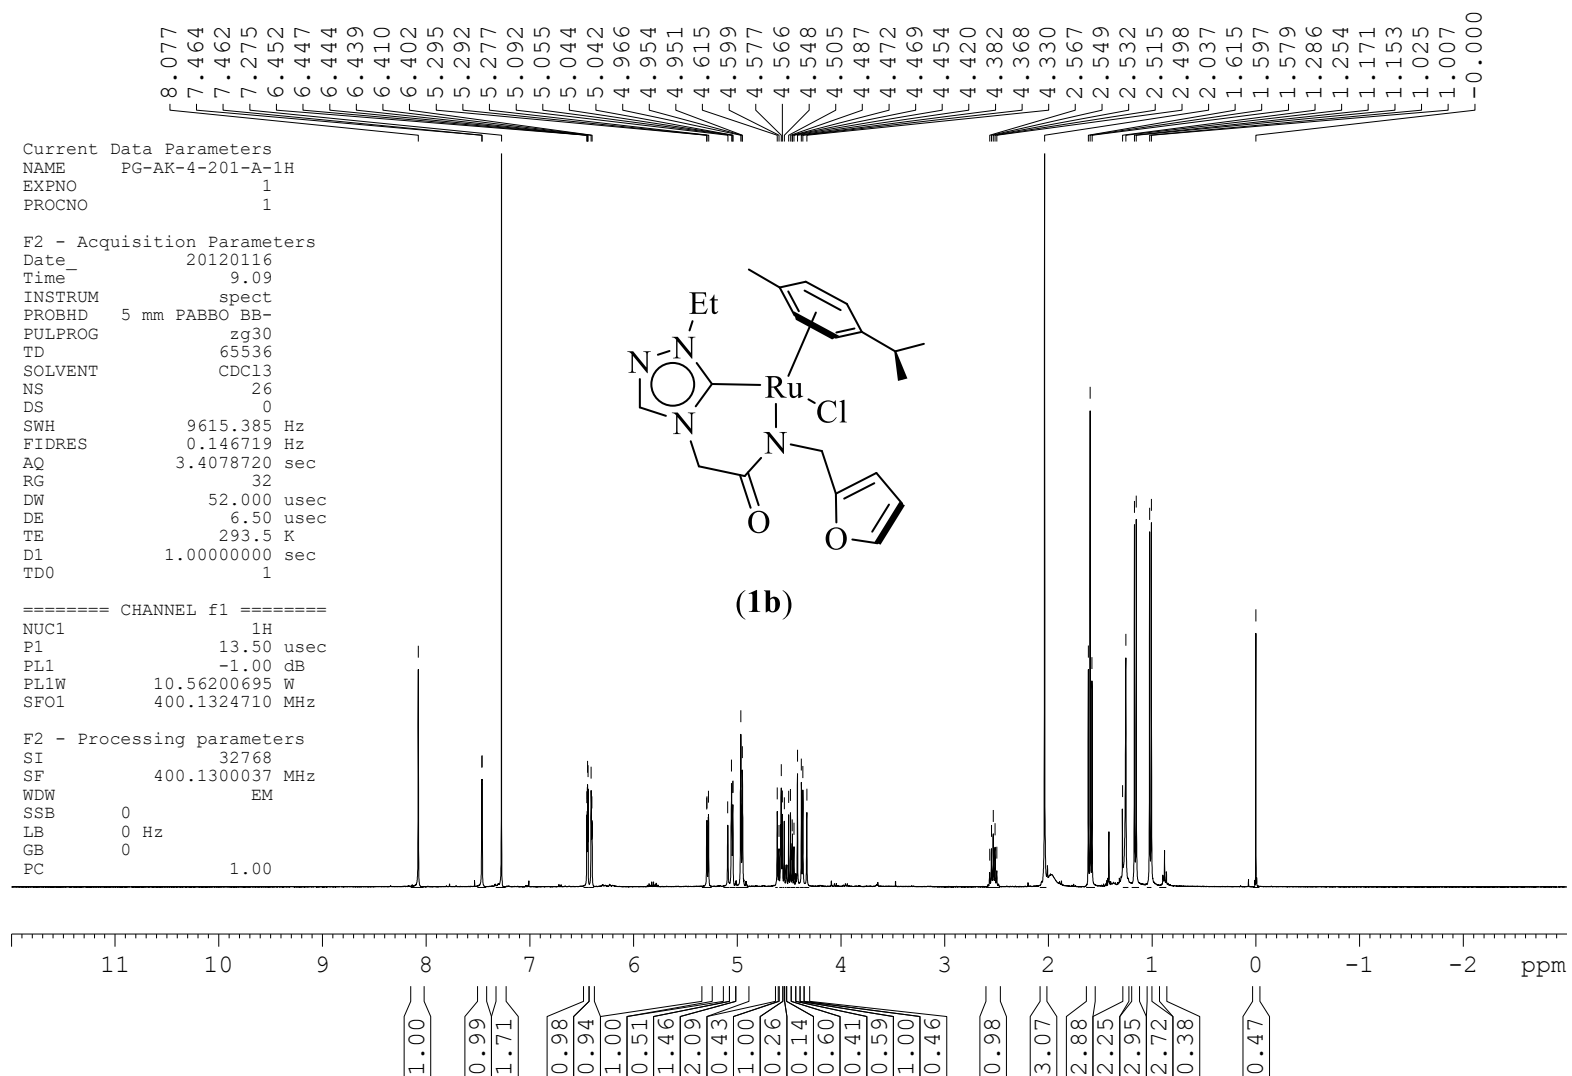

Figure S1. <sup>1</sup>H NMR spectrum of **1b** in CDCl<sub>3</sub>.

PG-AK-4-201-A-1H

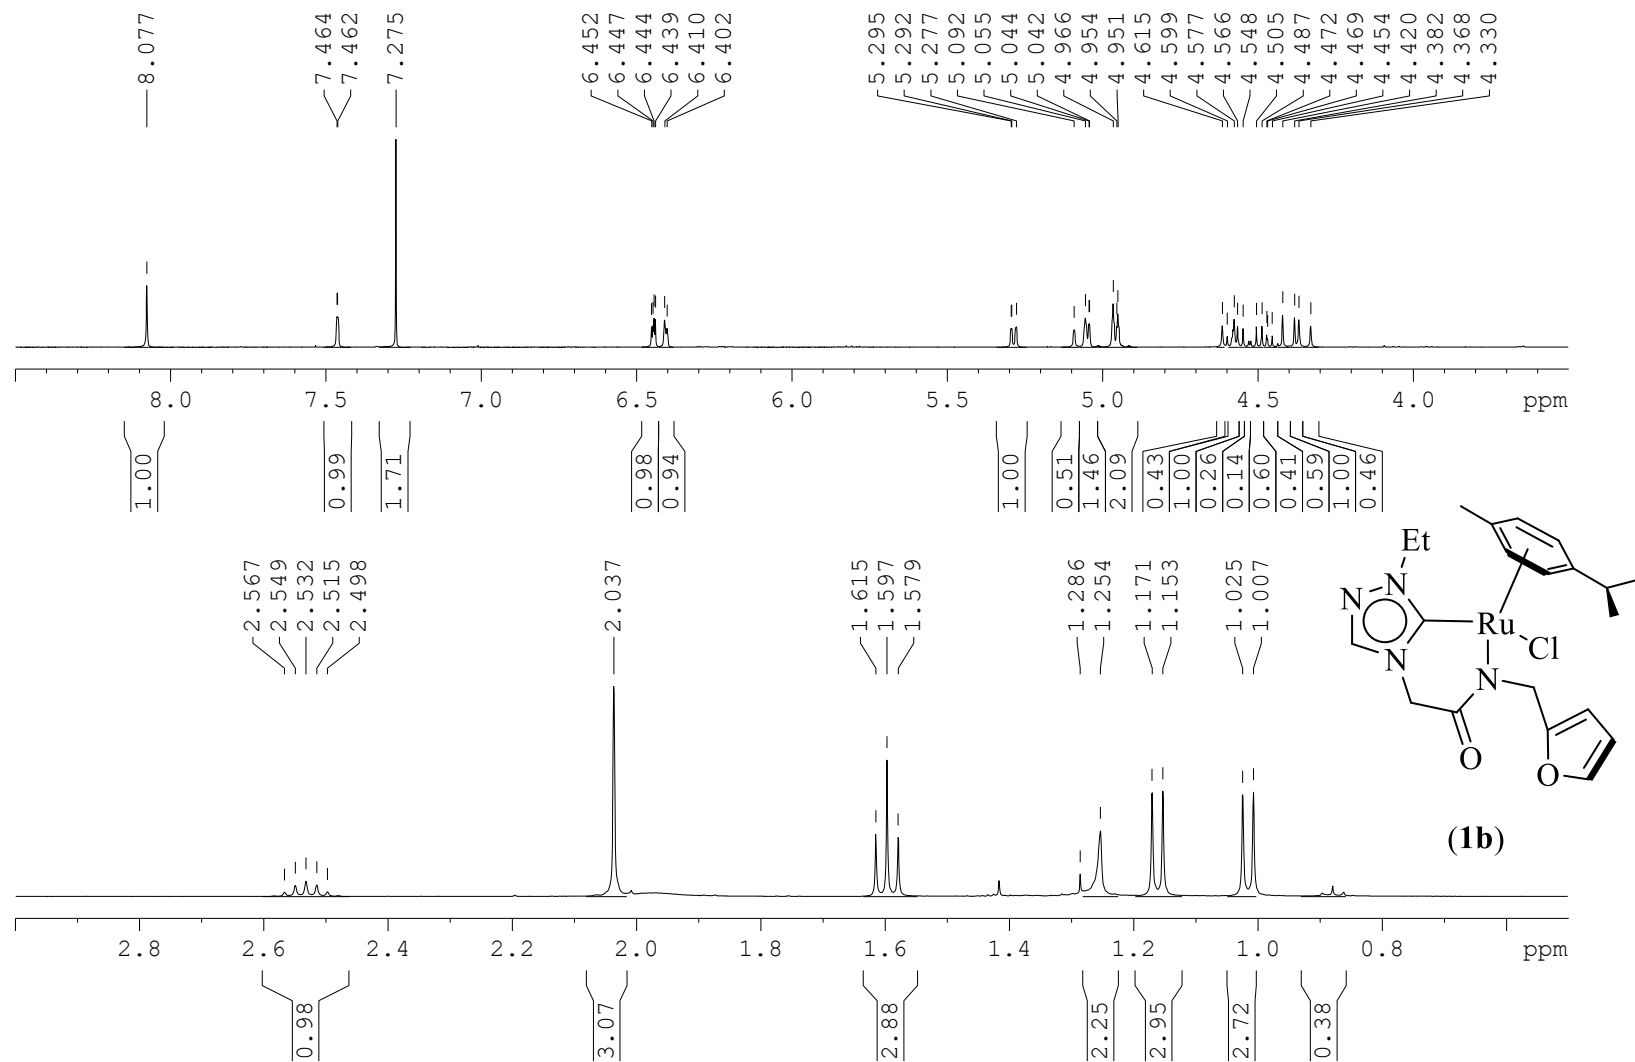

**Figure S2.** Expanded  $^1\text{H}$  NMR spectrum of **1b** in  $\text{CDCl}_3$ .



PG-AK-4-201-13C

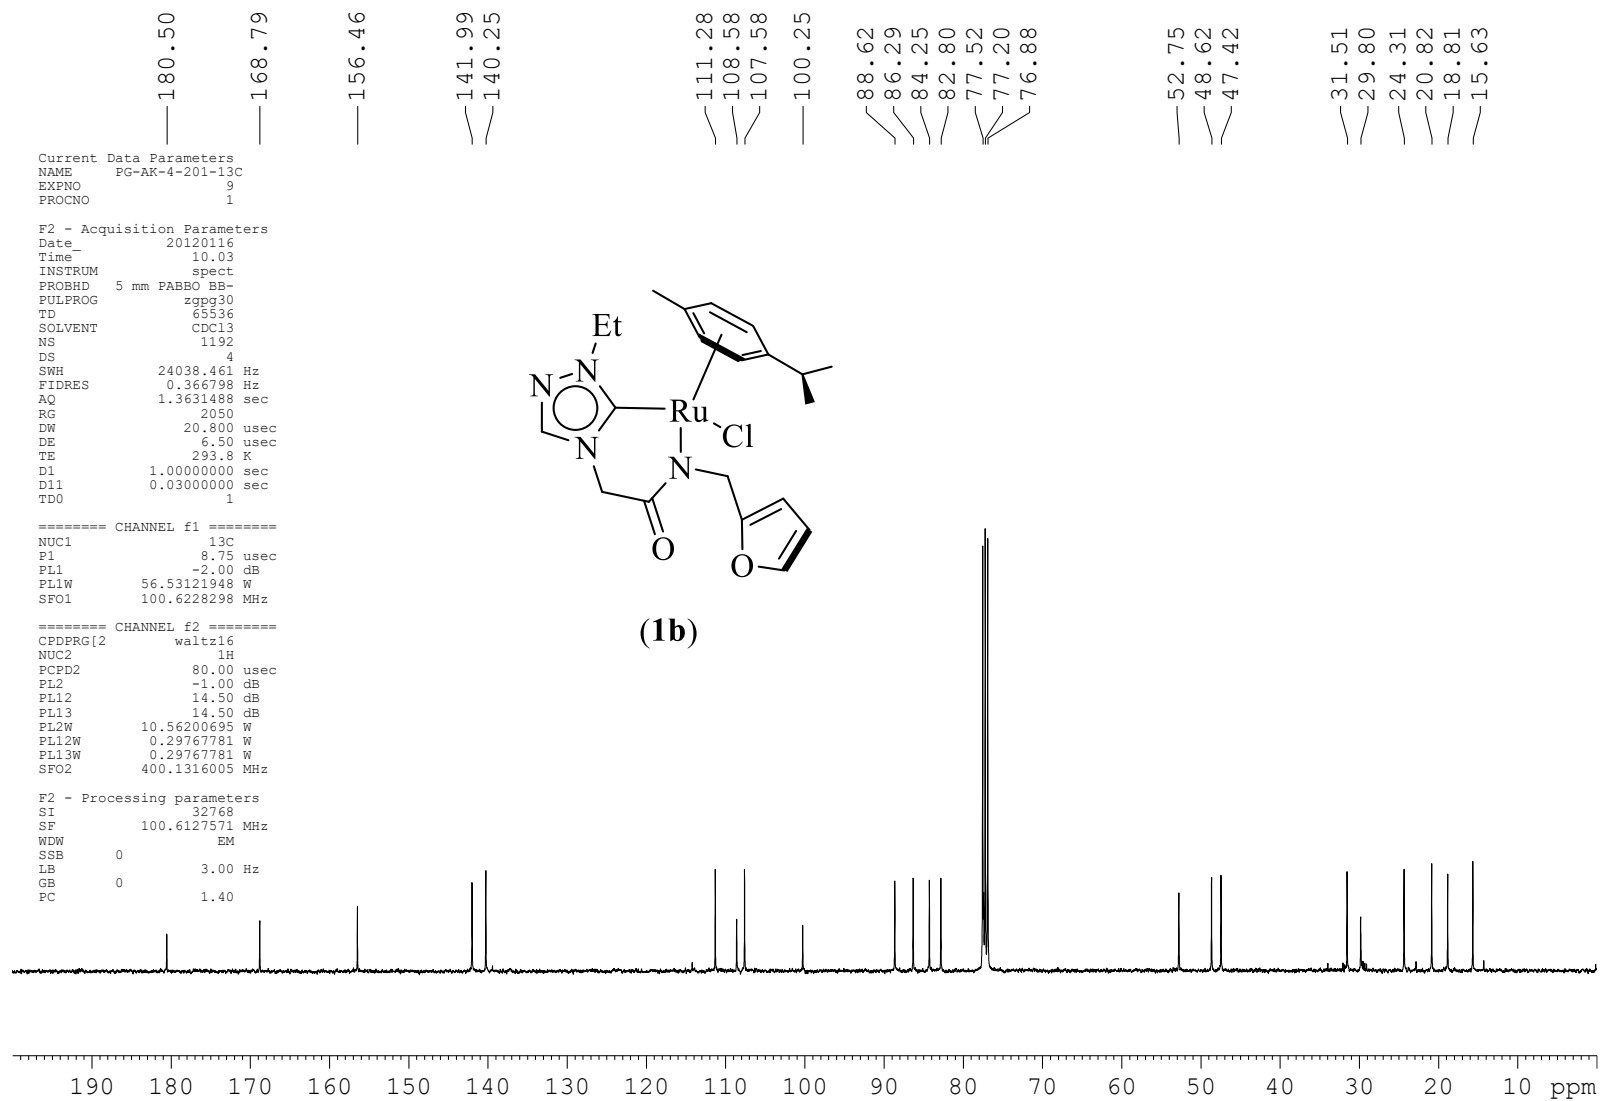

Figure S3.  $^{13}\text{C}\{^1\text{H}\}$  NMR spectrum of **1b** in  $\text{CDCl}_3$ .

PG-AK-4-201-13C

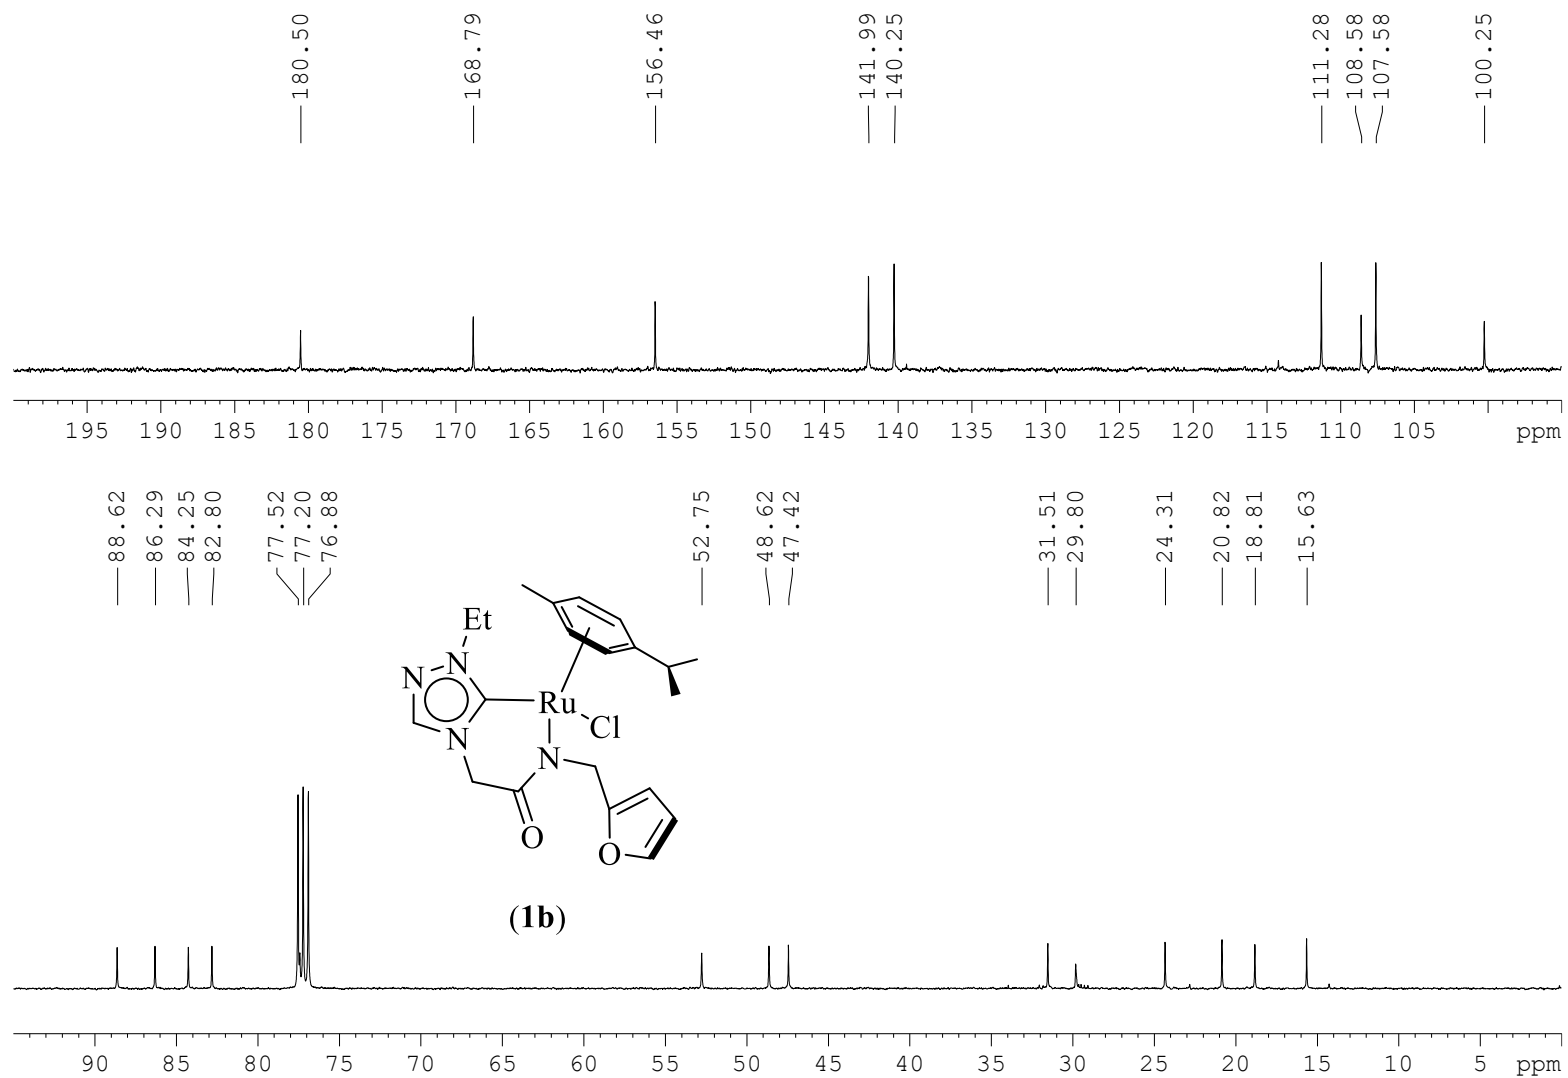

**Figure S4.** Expanded  $^{13}\text{C}\{^1\text{H}\}$  NMR spectrum of **1b** in  $\text{CDCl}_3$

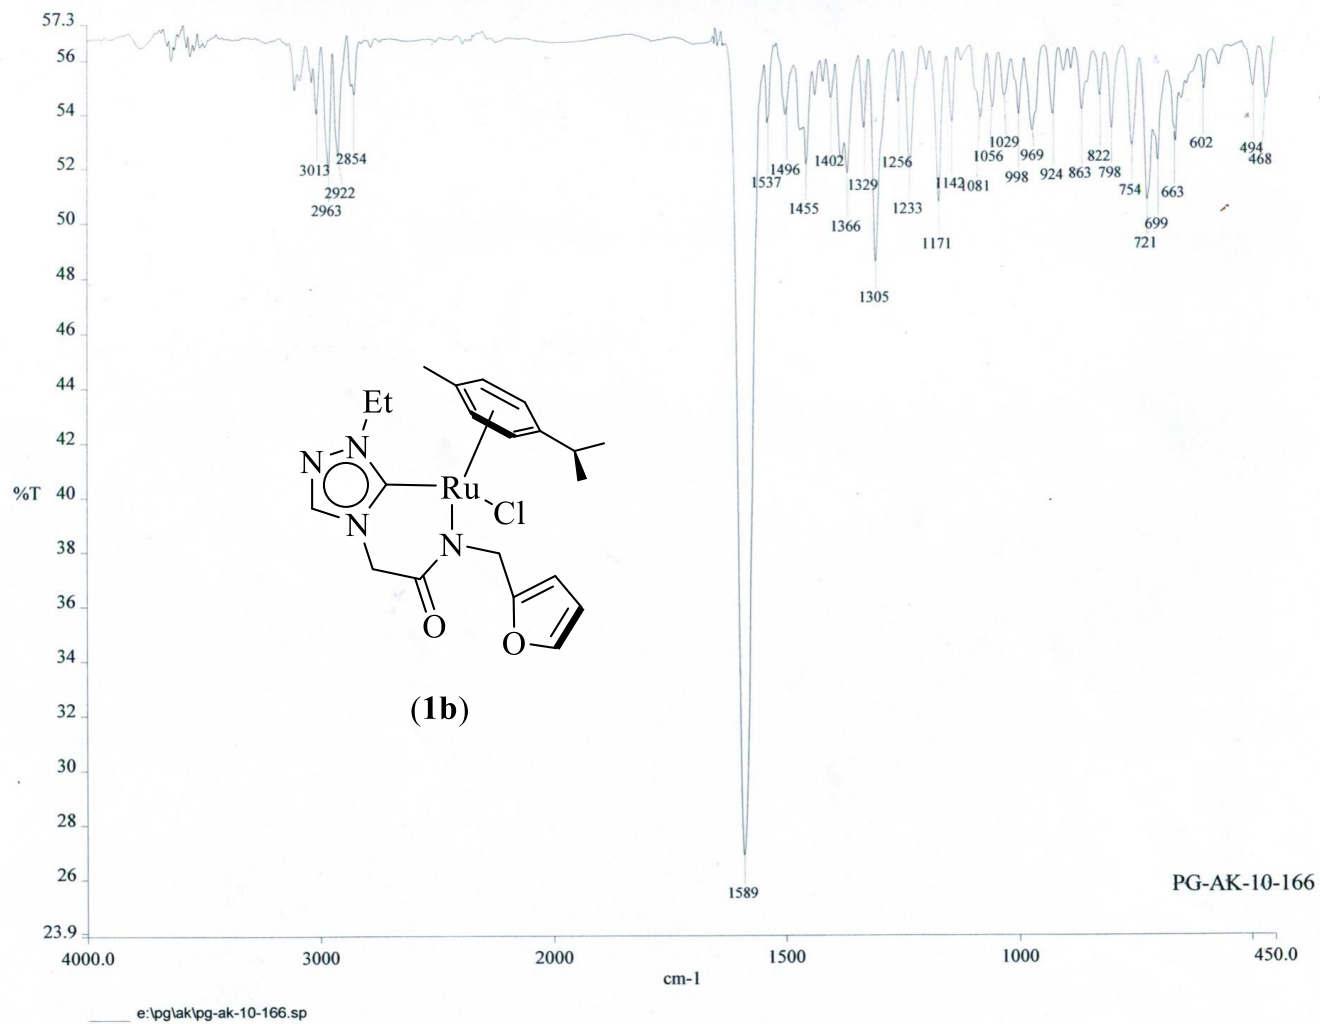

**Figure S5.** Infrared spectrum of **1b** in KBr

DEPARTMENT OF CHEMISTRY, I.I.T.(B)

**Analysis Info**  
 Analysis Name D:\Data\NOV-14\PG-AK-10-166-1A.d Acquisition Date 11/22/2014 8:24:27 PM  
 Method Tune\_pos\_NAICSI-1000.m Operator PG CS IN  
 Sample Name PG-AK-10-166-1 Instrument maXis impact 282001.00081  
 Comment C21H27ClN4O2Ru

**Acquisition Parameter**  
 Source Type ESI Ion Polarity Positive Set Nebulizer 0.3 Bar  
 Focus Active Set Capillary 3800 V Set Dry Heater 180 °C  
 Scan Begin 50 m/z Set End Plate Offset -500 V Set Dry Gas 4.0 l/min  
 Scan End 700 m/z Set Collision Cell RF 1500.0 Vpp Set Divert Valve Source

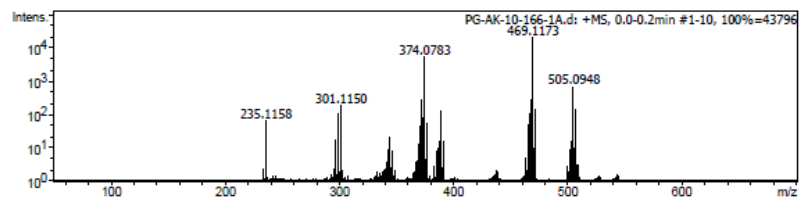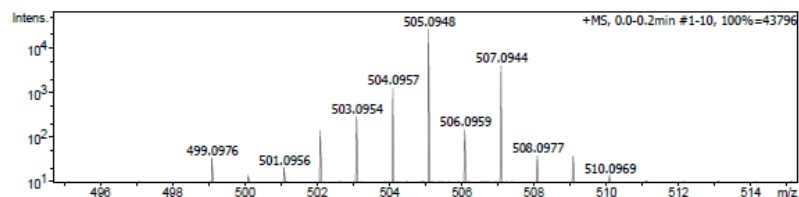

| Meas. m/z | # | Ion Formula    | m/z      | err [ppm] | mSigma | # Sigma | Score  | rdb  | e <sup>-</sup> Conf | N-Rule |
|-----------|---|----------------|----------|-----------|--------|---------|--------|------|---------------------|--------|
| 505.0948  | 1 | C21H28ClN4O2Ru | 505.0941 | -1.4      | 11.5   | 1       | 100.00 | 10.0 | odd                 | -      |

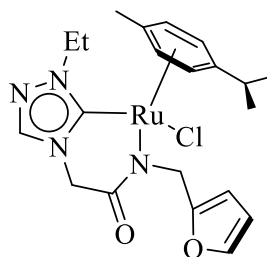

(1b)

Figure S6. High Resolution Mass Spectrometry (HRMS) data of 1b.

SP18022016 (varioMICRO) from: 09-10-2021 00:21:59

SP18022016  
varioMICRO CHNS  
serial number: 15154051

Graphic report

| No. | Weight [mg] | Name           | Method     | N Area | C Area | H Area | N [%] | C [%] | H [%] | Date       | Time  | Info |
|-----|-------------|----------------|------------|--------|--------|--------|-------|-------|-------|------------|-------|------|
| 44  | 1.1030      | PG-ST-02-145-1 | 2mgChem80s | 8 043  | 15 811 | 5 797  | 11.85 | 50.77 | 5.050 | 08-10-2021 | 17:48 |      |

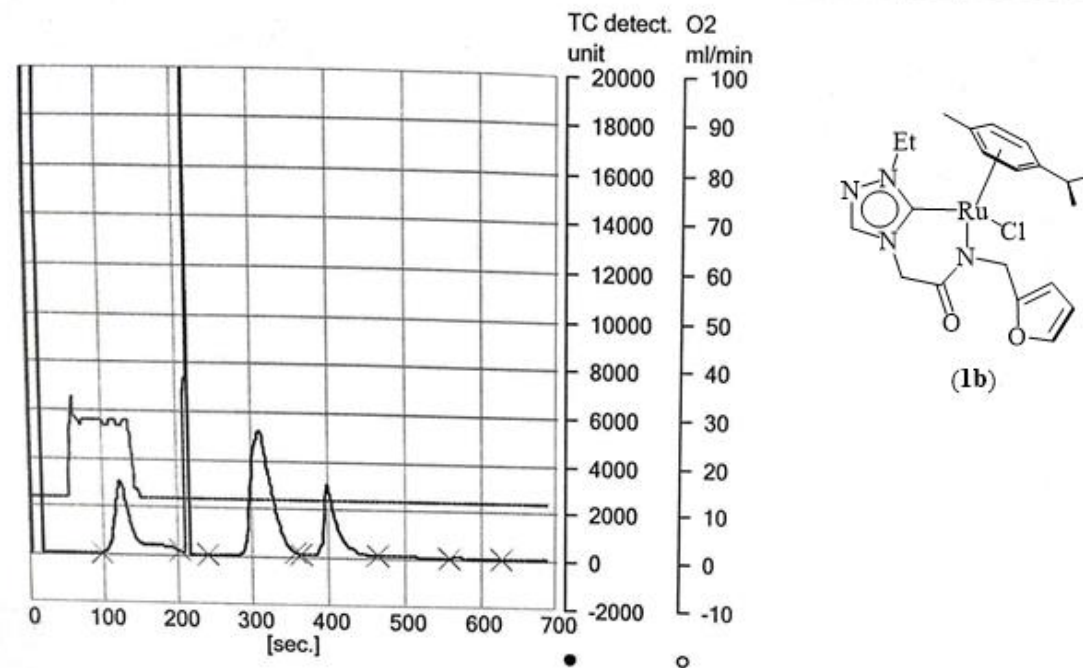

Figure S7. Elemental analysis data of 1b.

PG-AK-6-157-1-1H

Current Data Parameters  
NAME PG-AK-6-157-1-1H  
EXPNO 2  
PROCNO 1

F2 - Acquisition Parameters  
Date\_ 20130225  
Time\_ 12.32  
INSTRUM spect  
PROBHD 5 mm PABBO BB-  
PULPROG zg30  
TD 65536  
SOLVENT CDCl3  
NS 12  
DS 0  
SWH 8223.685 Hz  
FIDRES 0.125483 Hz  
AQ 3.9845889 sec  
RG 181  
DW 60.800 usec  
DE 6.50 usec  
TE 294.4 K  
D1 1.00000000 sec  
TD0 1

==== CHANNEL f1 =====  
NUC1 1H  
P1 13.50 usec  
PL1 -1.00 dB  
PL1W 10.56200695 W  
SFO1 400.1324710 MHz

F2 - Processing parameters  
SI 32768  
SF 400.1300092 MHz  
WDW EM  
SSB 0  
LB 0.30 Hz  
GB 0  
PC 1.00

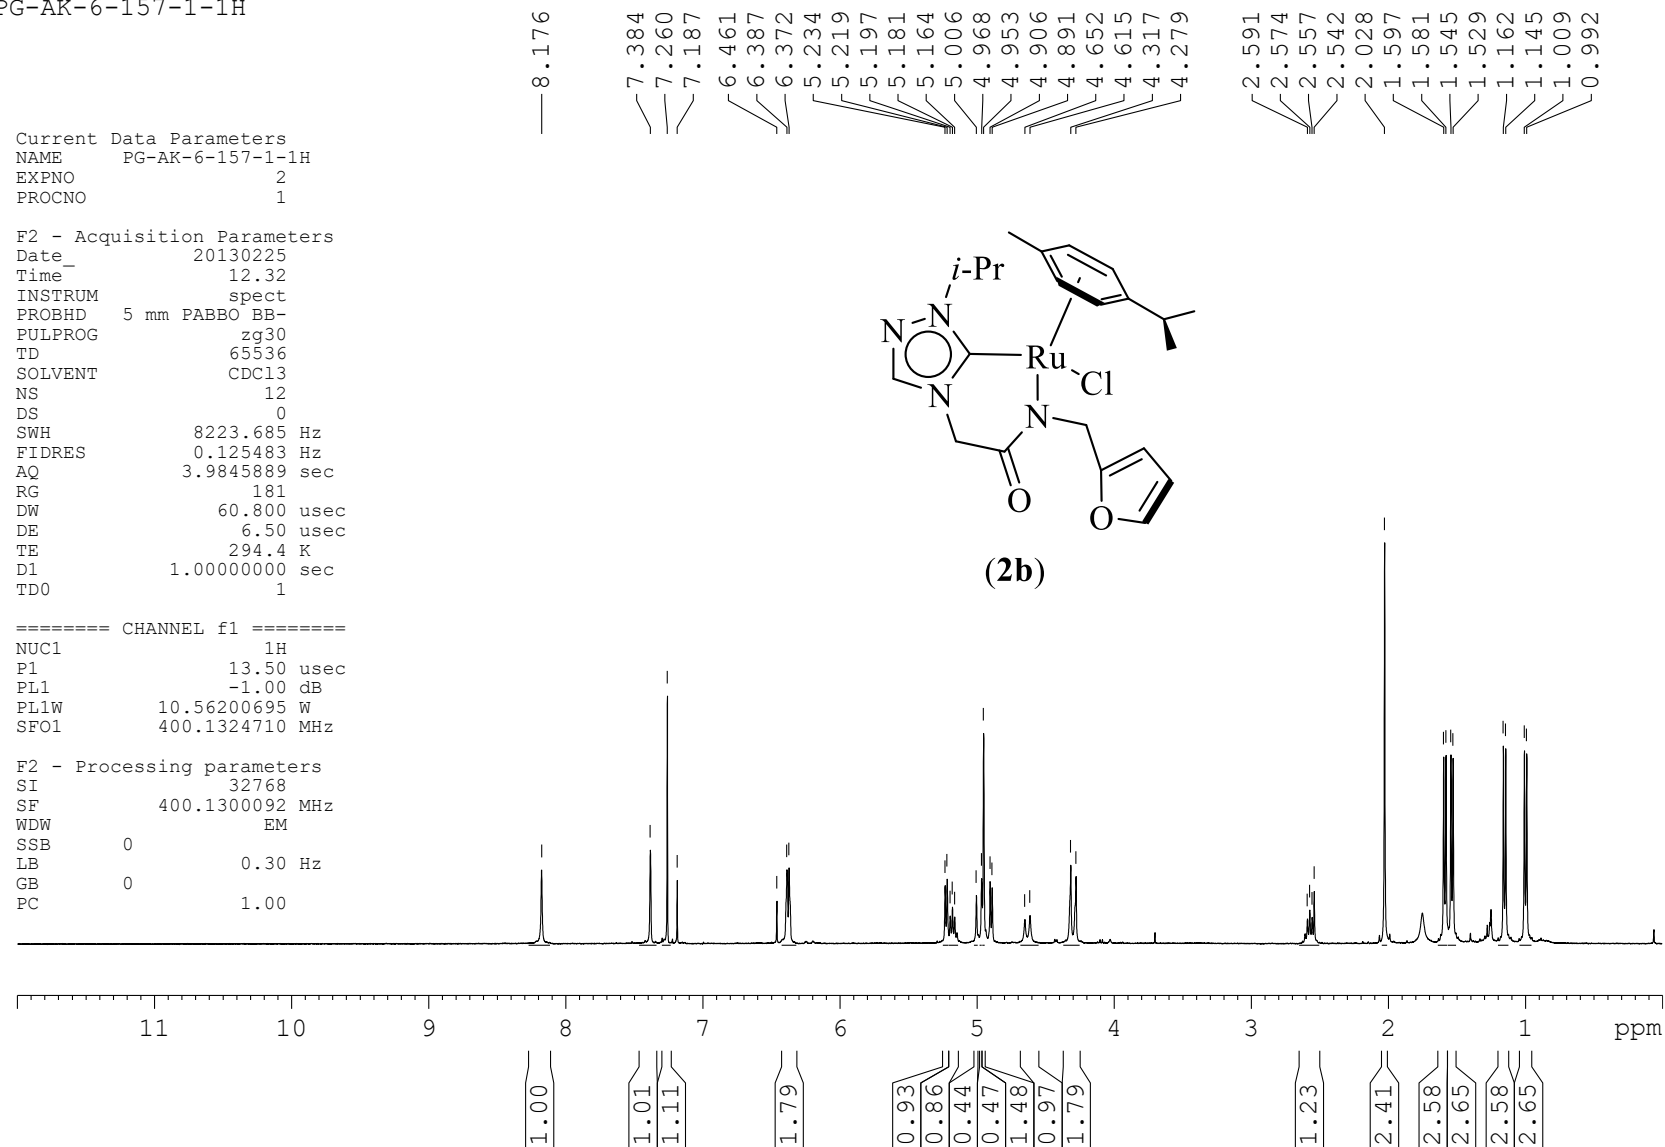

Figure S8. <sup>1</sup>H NMR spectrum of **2b** in CDCl<sub>3</sub>.

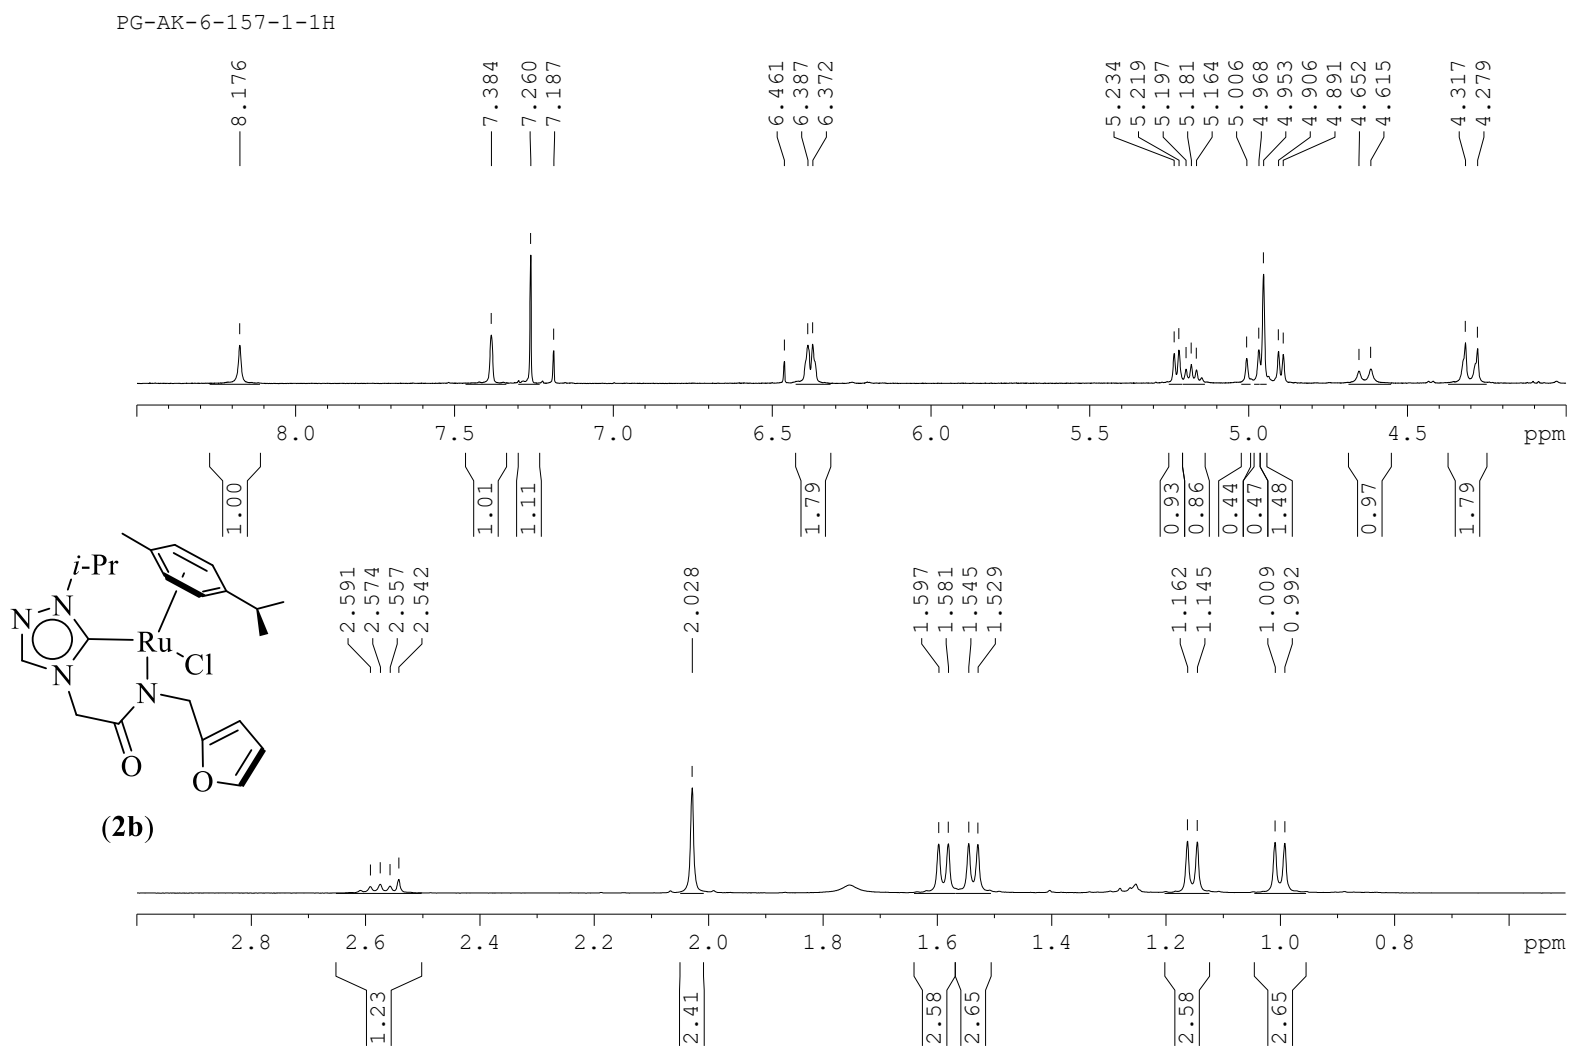

**Figure S9.** Expanded  $^1\text{H}$  NMR spectrum of **2b** in  $\text{CDCl}_3$ .

PG-AK-6-156-4-13C

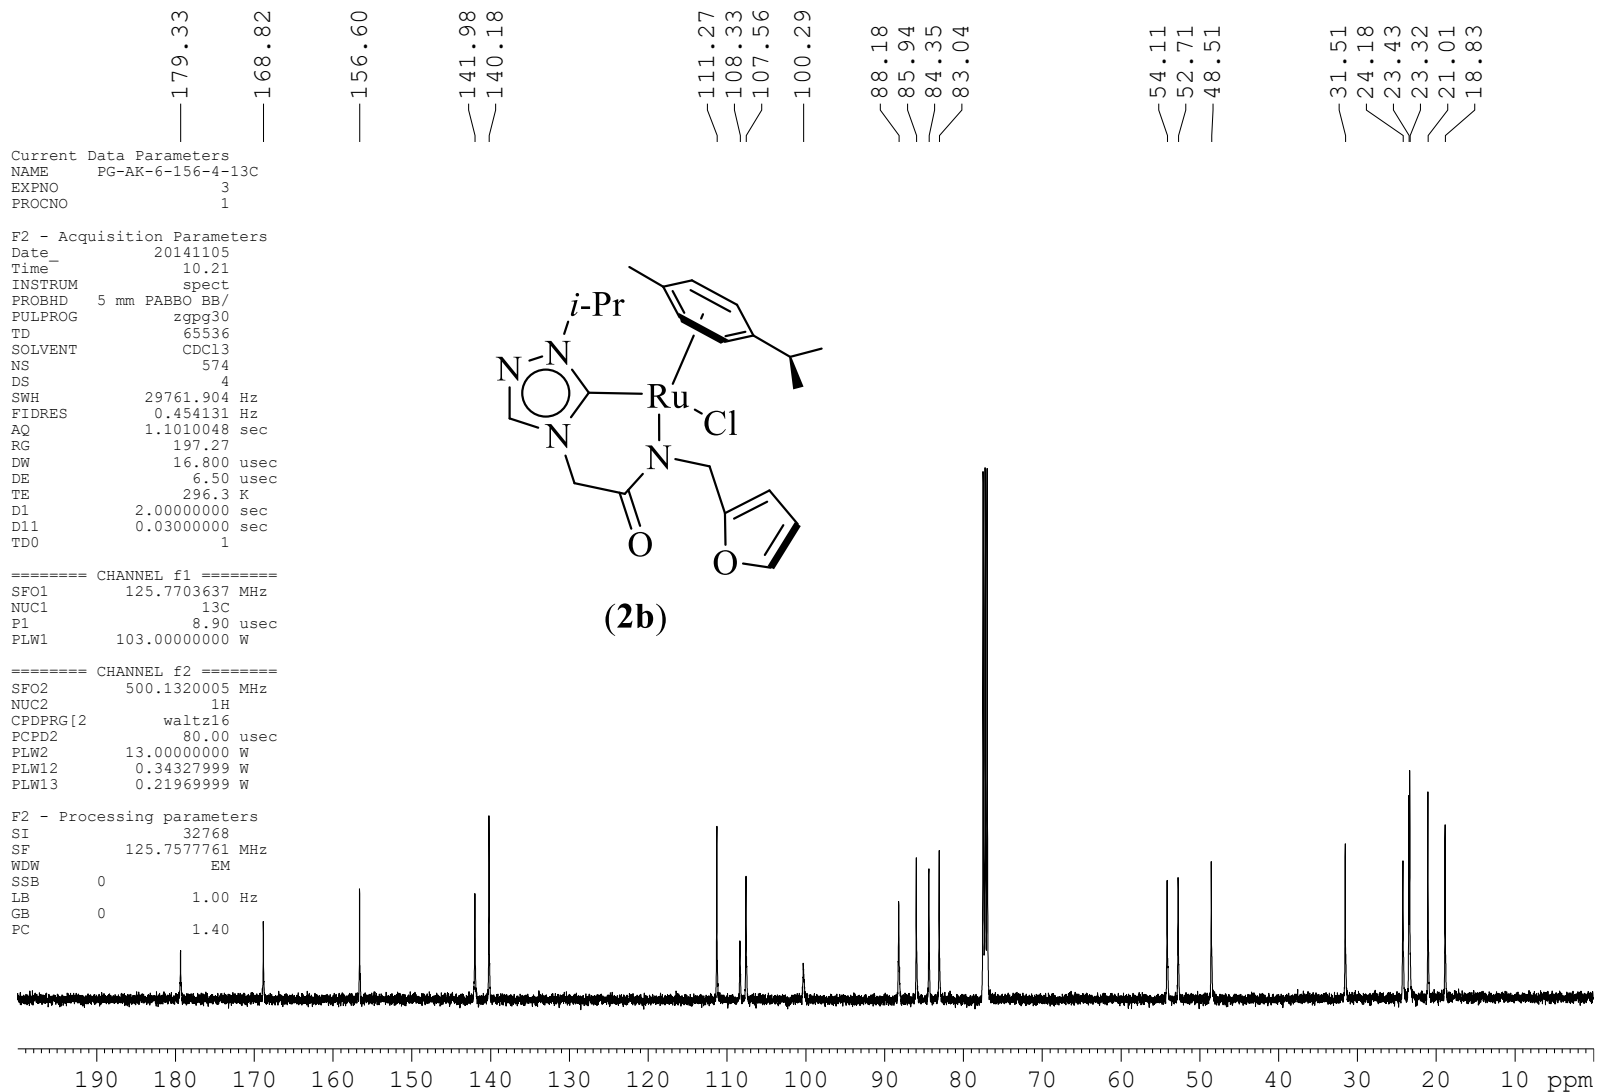

Figure S10.  $^{13}\text{C}\{^1\text{H}\}$  NMR spectrum of **2b** in  $\text{CDCl}_3$ .



PG-AK-6-156-4-13C

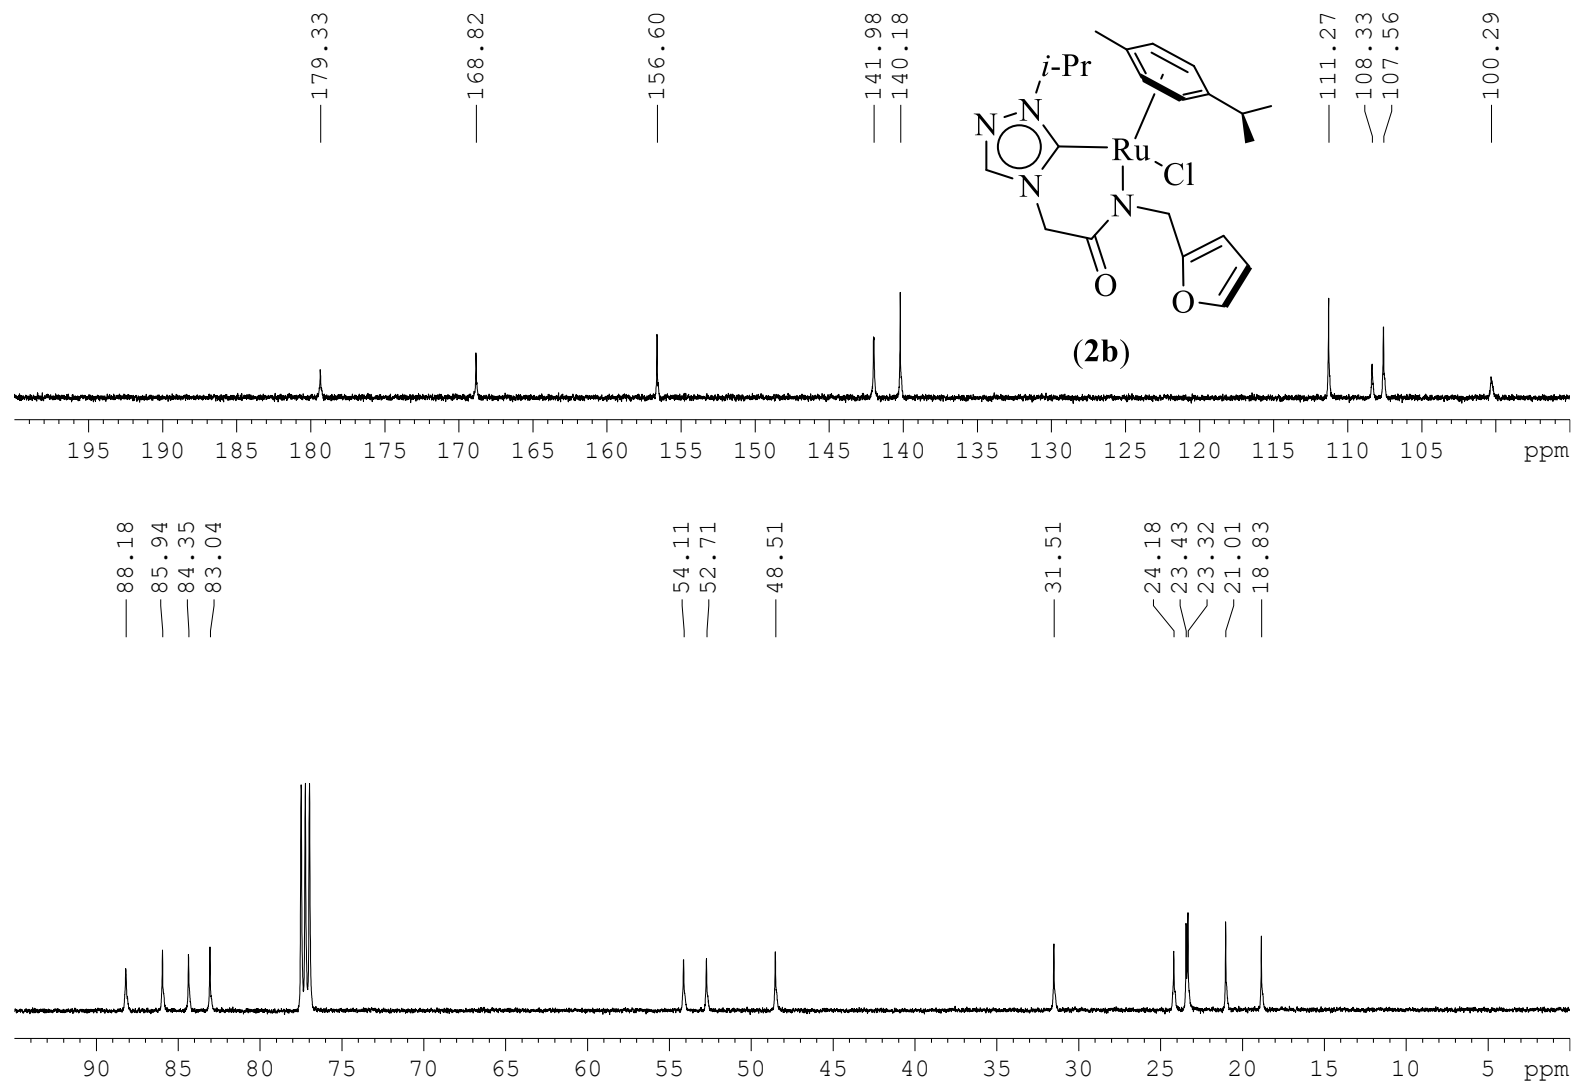

**Figure S11.** Expanded  $^{13}\text{C}\{^1\text{H}\}$  NMR spectrum of **2b** in  $\text{CDCl}_3$ .

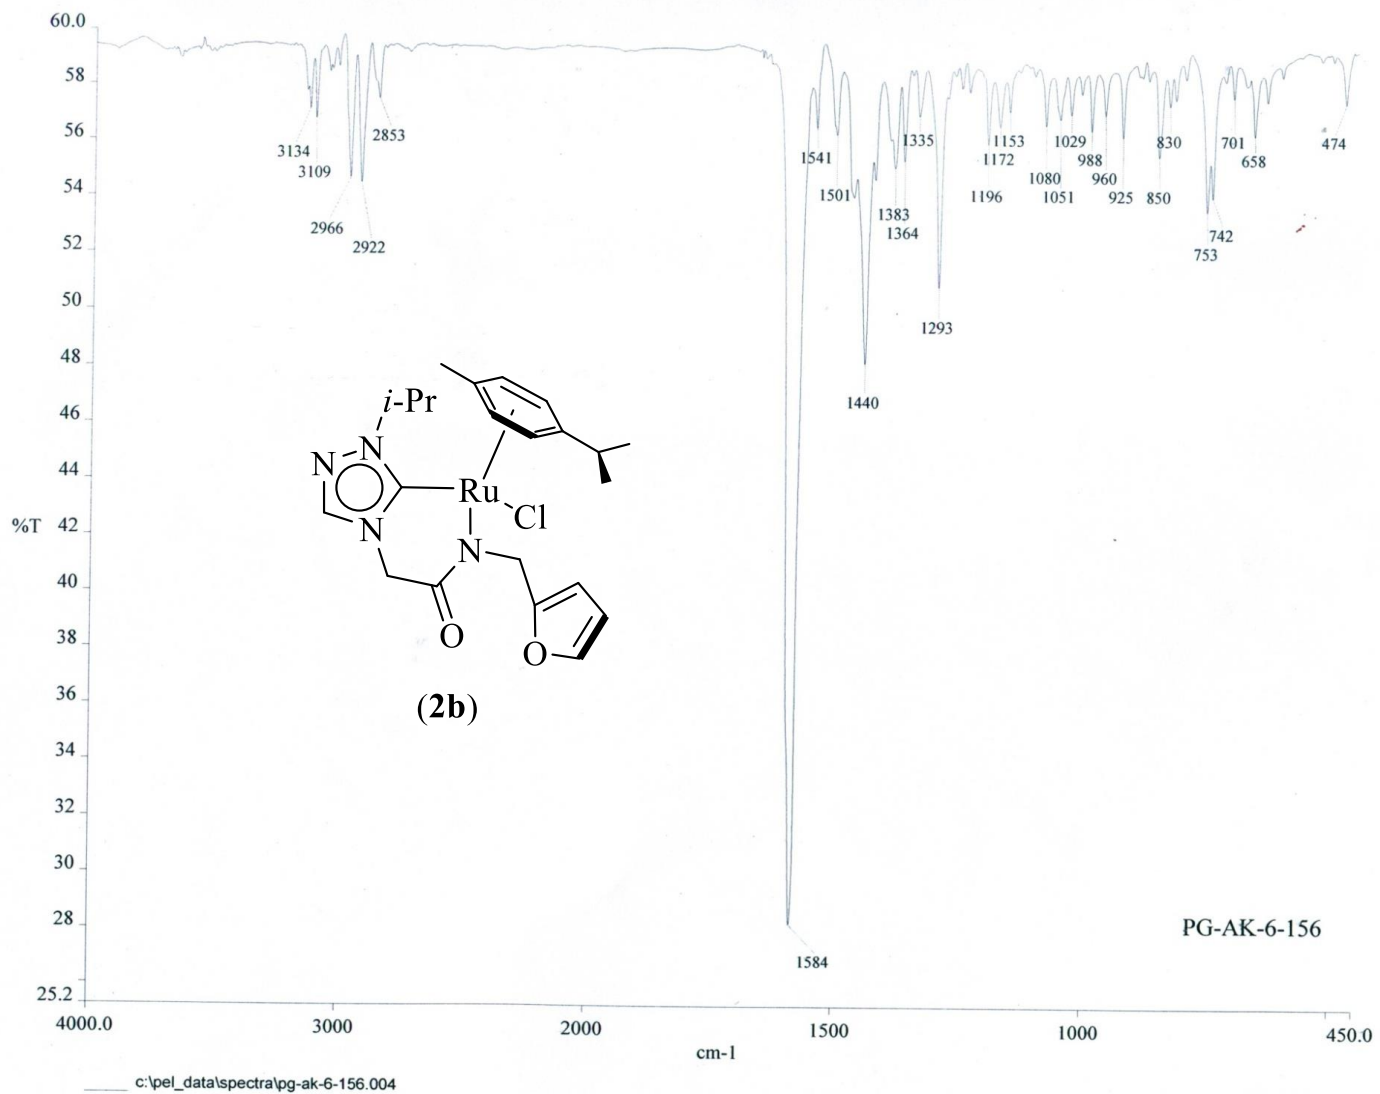

Figure S12. Infrared spectrum of **2b** in KBr

DEPARTMENT OF CHEMISTRY, I.I.T.(B)

**Analysis Info** Acquisition Date 11/22/2014 8:10:21 PM  
 Analysis Name D:\Data\NOV-14\PG-AK-6-156-1.d  
 Method Tune\_pos\_NAICSI-1000.m Operator PG CS IN  
 Sample Name PG-AK-6-156-1 Instrument maXis impact 282001.00081  
 Comment C22H29ClN4O2Ru

**Acquisition Parameter**  
 Source Type ESI Ion Polarity Positive Set Nebulizer 0.3 Bar  
 Focus Active Set Capillary 3800 V Set Dry Heater 180 °C  
 Scan Begin 50 m/z Set End Plate Offset -500 V Set Dry Gas 4.0 l/min  
 Scan End 700 m/z Set Collision Cell RF 1500.0 Vpp Set Divert Valve Source

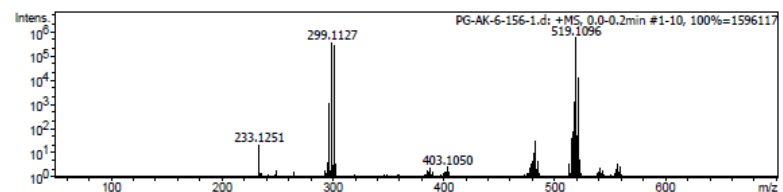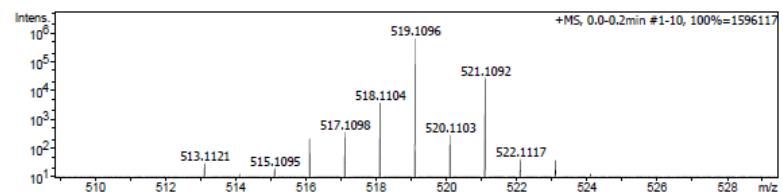

| Meas. m/z | # | Ion Formula    | m/z      | err [ppm] | mSigma | # Sigma | Score  | rdB  | e <sup>-</sup> Conf | N-Rule |
|-----------|---|----------------|----------|-----------|--------|---------|--------|------|---------------------|--------|
| 519.1096  | 1 | C22H30ClN4O2Ru | 519.1096 | 0.4       | 47.1   | 1       | 100.00 | 10.0 | odd                 | -      |

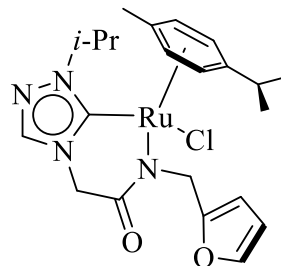

(2b)

Figure S13. High Resolution Mass Spectrometry (HRMS) data of 2b.

## Eager 300 Report

Page: 1 Sample: PG-AK-6-Ru-180 (PG-AK-6-Ru-180)

Method Name : SP-130513  
Method File : D:\CHNS2012\SP-130513.mth  
Chromatogram : PG-AK-6-Ru-180  
Operator ID : MNRAO  
Analysed : 05/13/2013 16:39  
Sample ID : PG-AK-6-Ru-180 (# 16)  
Analysis Type : UnkNown (Area)

Company Name : C.E. Instruments  
Printed : 5/13/2013 18:54  
Instrument N. : Instrument #1  
Sample weight : .735

Calib. method : using 'K Factors'

!!! Warning missing one or more peaks.

| Element Name | %       | Ret.Time | Area    | BC | Area ratio | K factor    |
|--------------|---------|----------|---------|----|------------|-------------|
| Nitrogen     | 11.2174 | 43       | 166571  | FU | 6.007363   | .101682E+07 |
| Carbon       | 50.6220 | 66       | 1000650 | FU | 1.000000   | .268086E+07 |
| Hydrogen     | 5.5164  | 178      | 273582  | RS | 3.657588   | .630570E+07 |
| Totals       | 67.3558 |          | 1440803 |    |            |             |

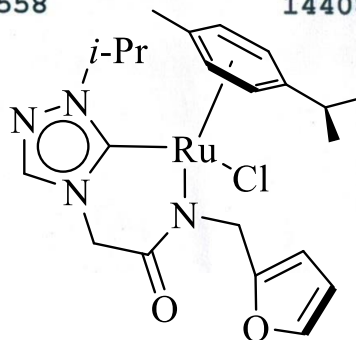

(2b)

Figure S14. Elemental analysis data of 2b.

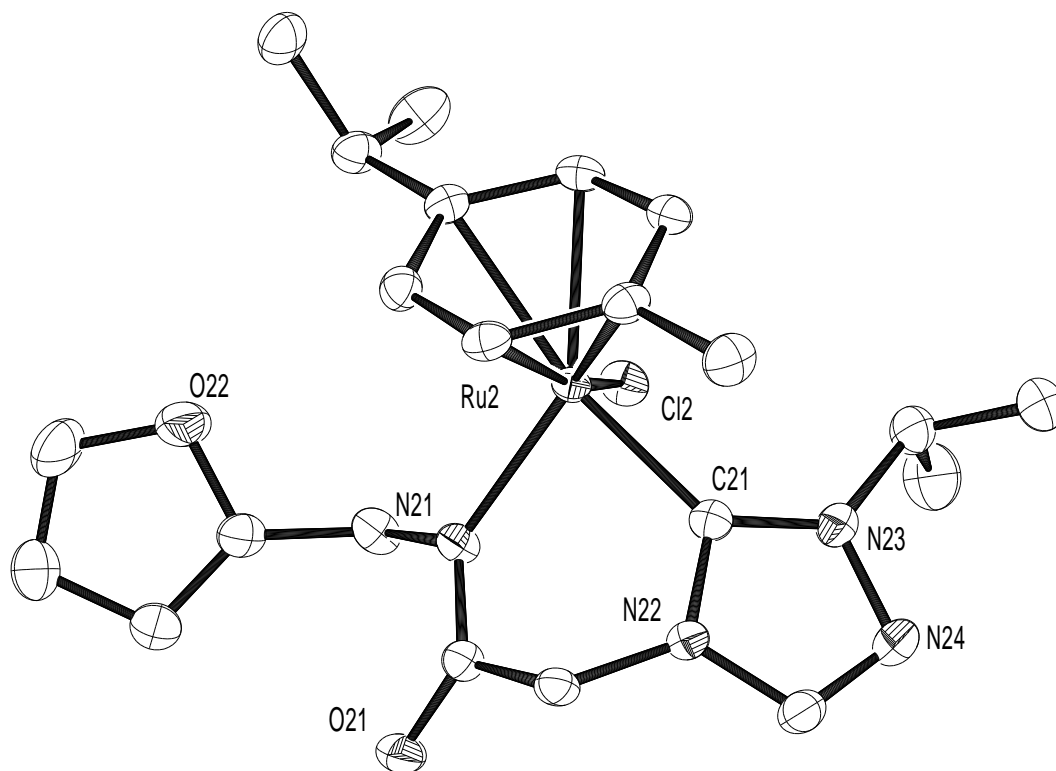

**Figure S15.** ORTEP diagram of **2b** with thermal ellipsoids are shown at the 50 % probability level. Selected bond lengths (Å) and angles (°): Ru2–C21 2.0384(19), Ru2–N21 2.1230(16), Ru2–Cl2 2.4319(5), C21–Ru2–N21 83.29(7), N21–Ru2–Cl2 86.37(4).

PG-AK-10-174-2-1H

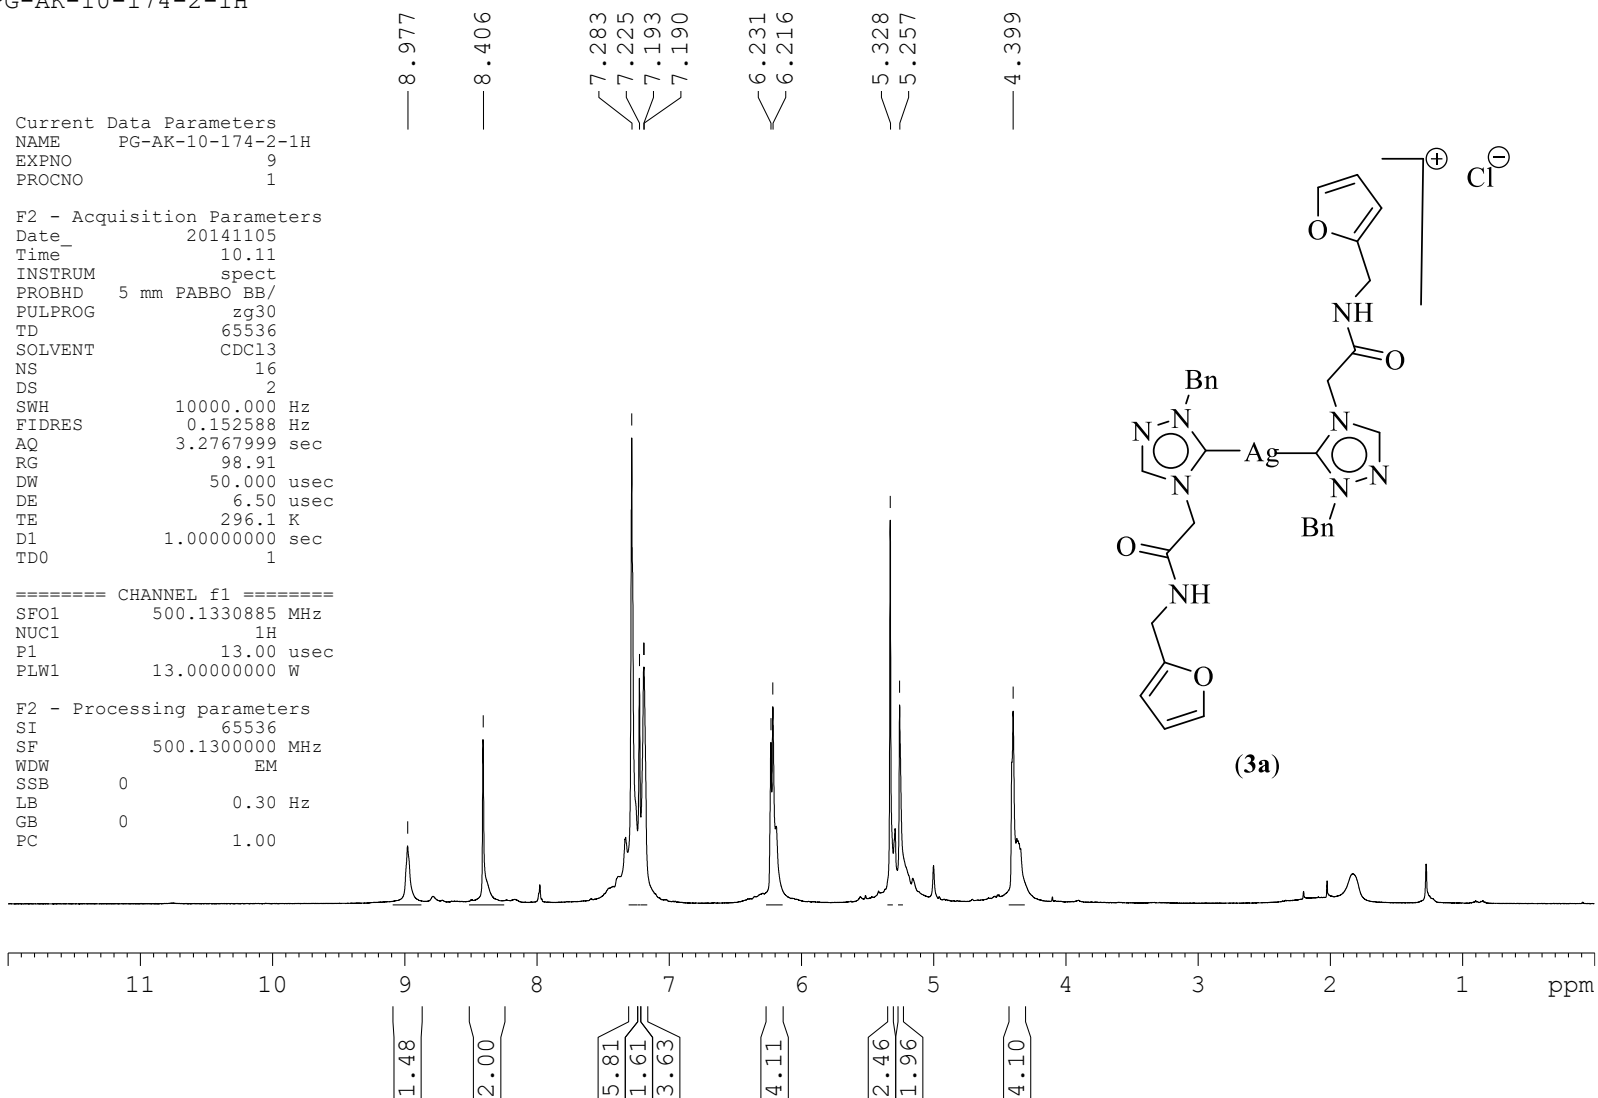

Figure S16. <sup>1</sup>H NMR spectrum of **3a** in CDCl<sub>3</sub>.

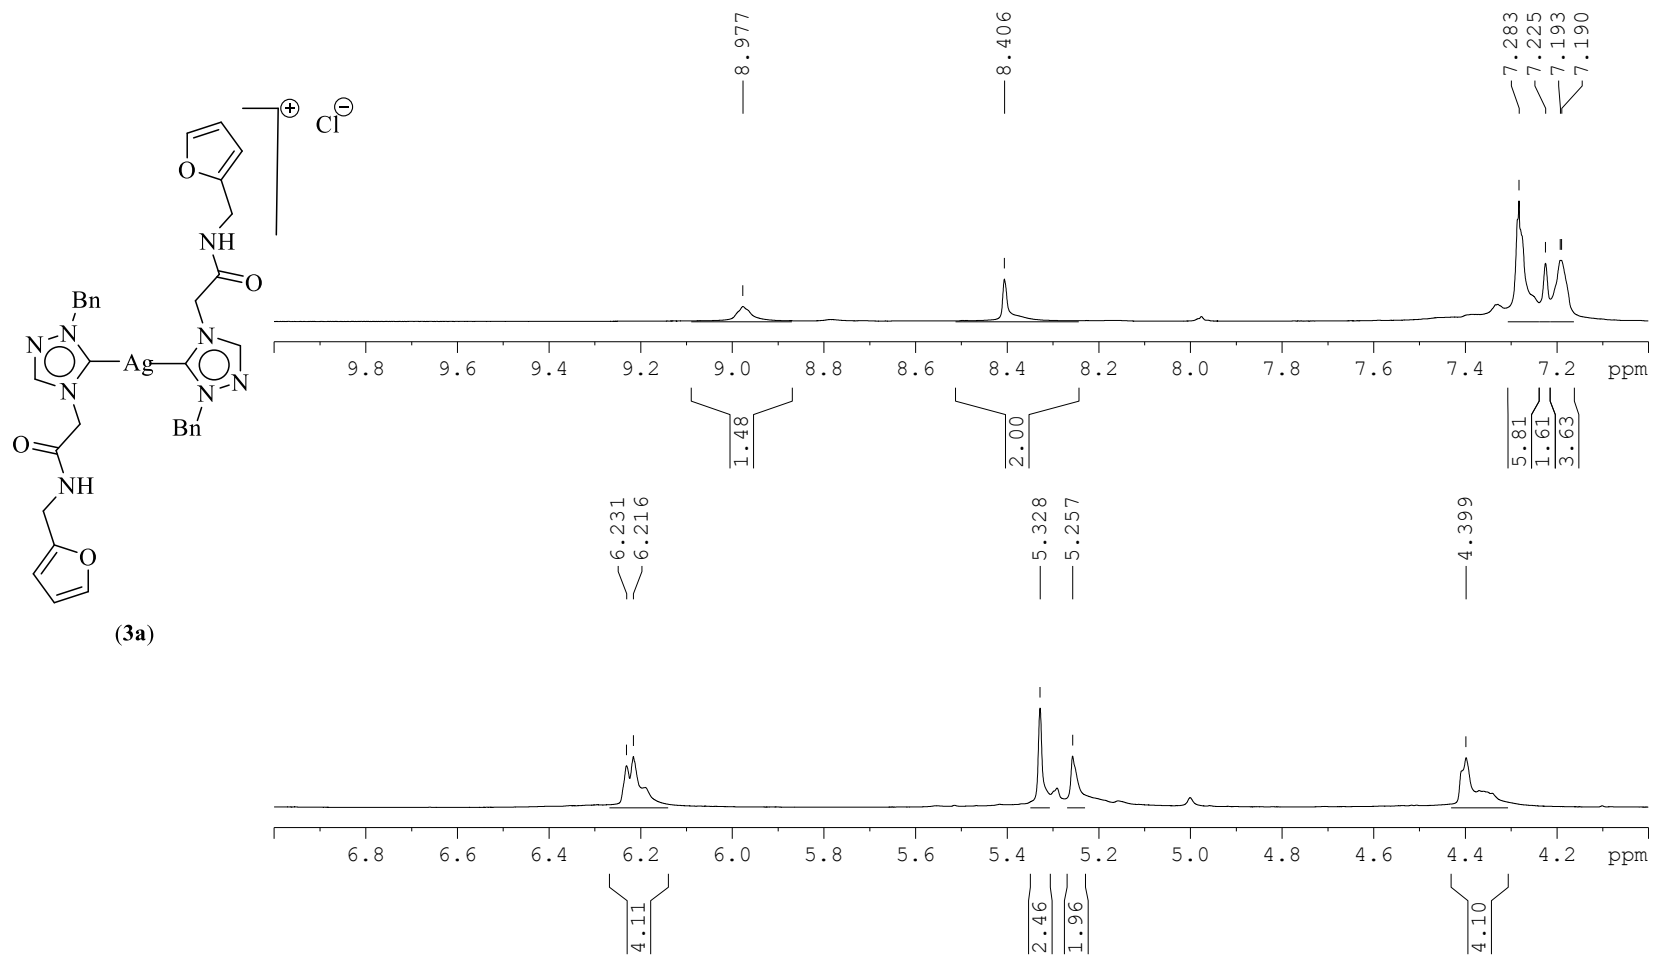

**Figure S17.** Expanded  $^1\text{H}$  NMR spectrum of **3a** in  $\text{CDCl}_3$

PG-AK-2-128-C13

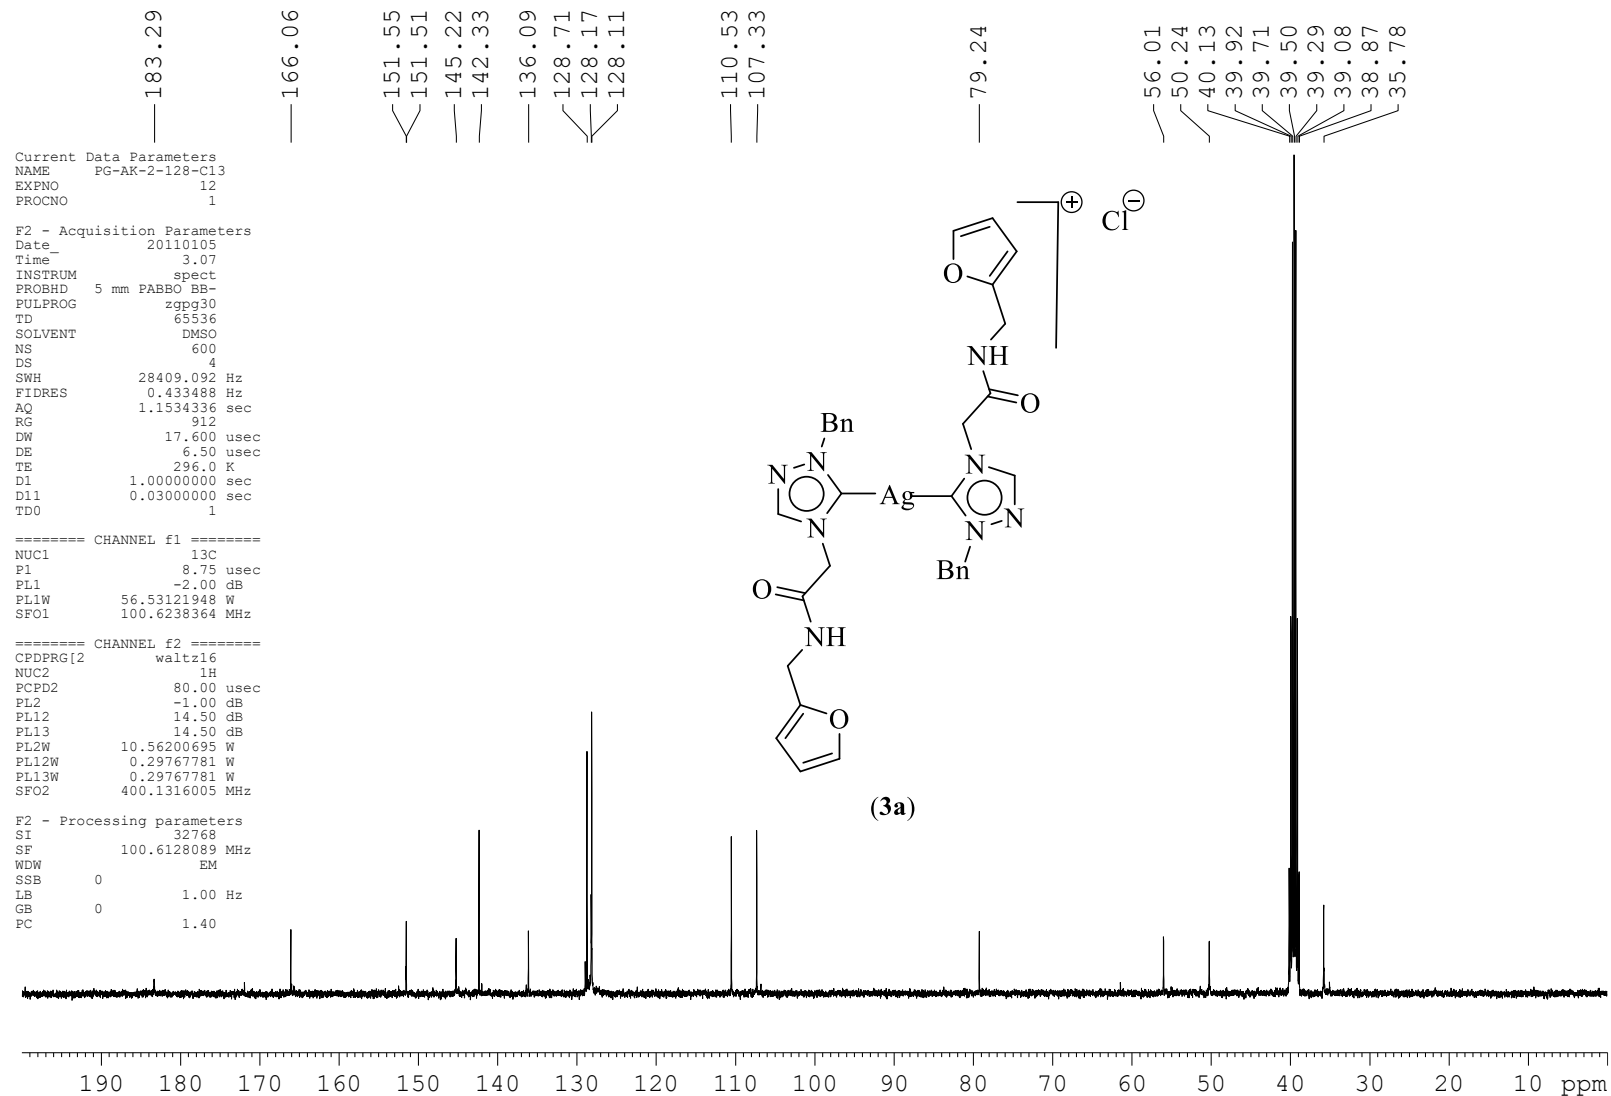

Figure S18.  $^{13}\text{C}\{^1\text{H}\}$  NMR spectrum of **3a** in  $\text{DMSO-}d_6$ .



PG-AK-2-128-C13

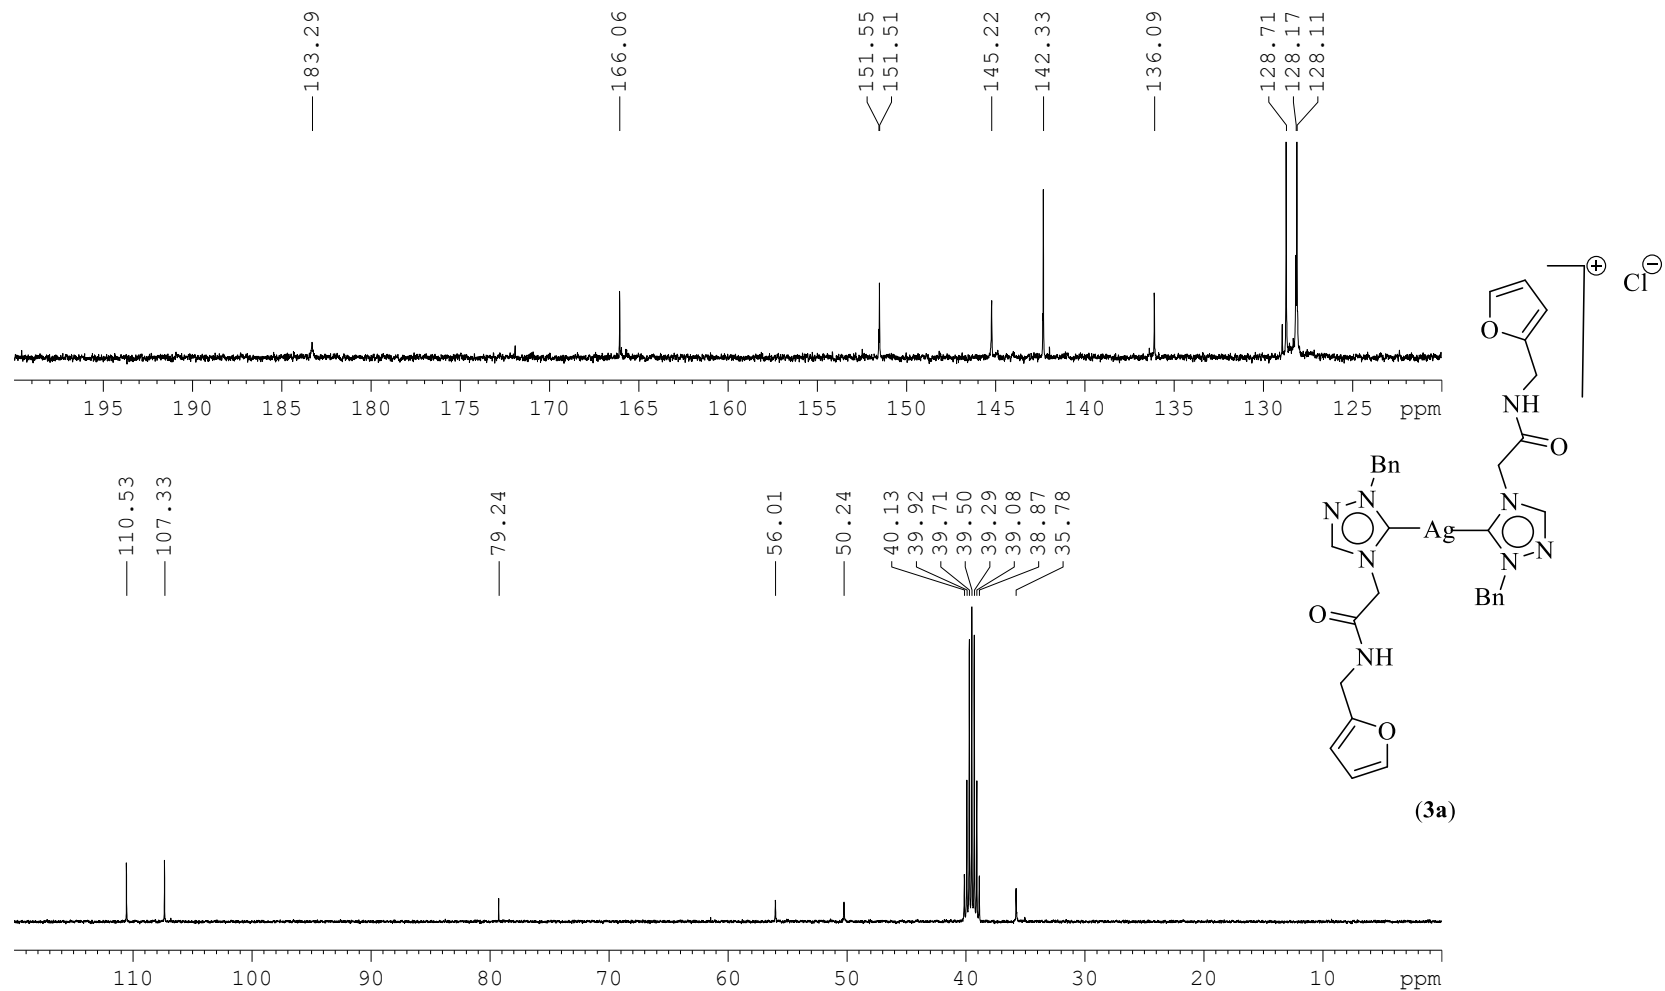

**Figure S19.** Expanded  $^{13}\text{C}\{^1\text{H}\}$  NMR spectrum of **3a** in  $\text{DMSO-}d_6$ .

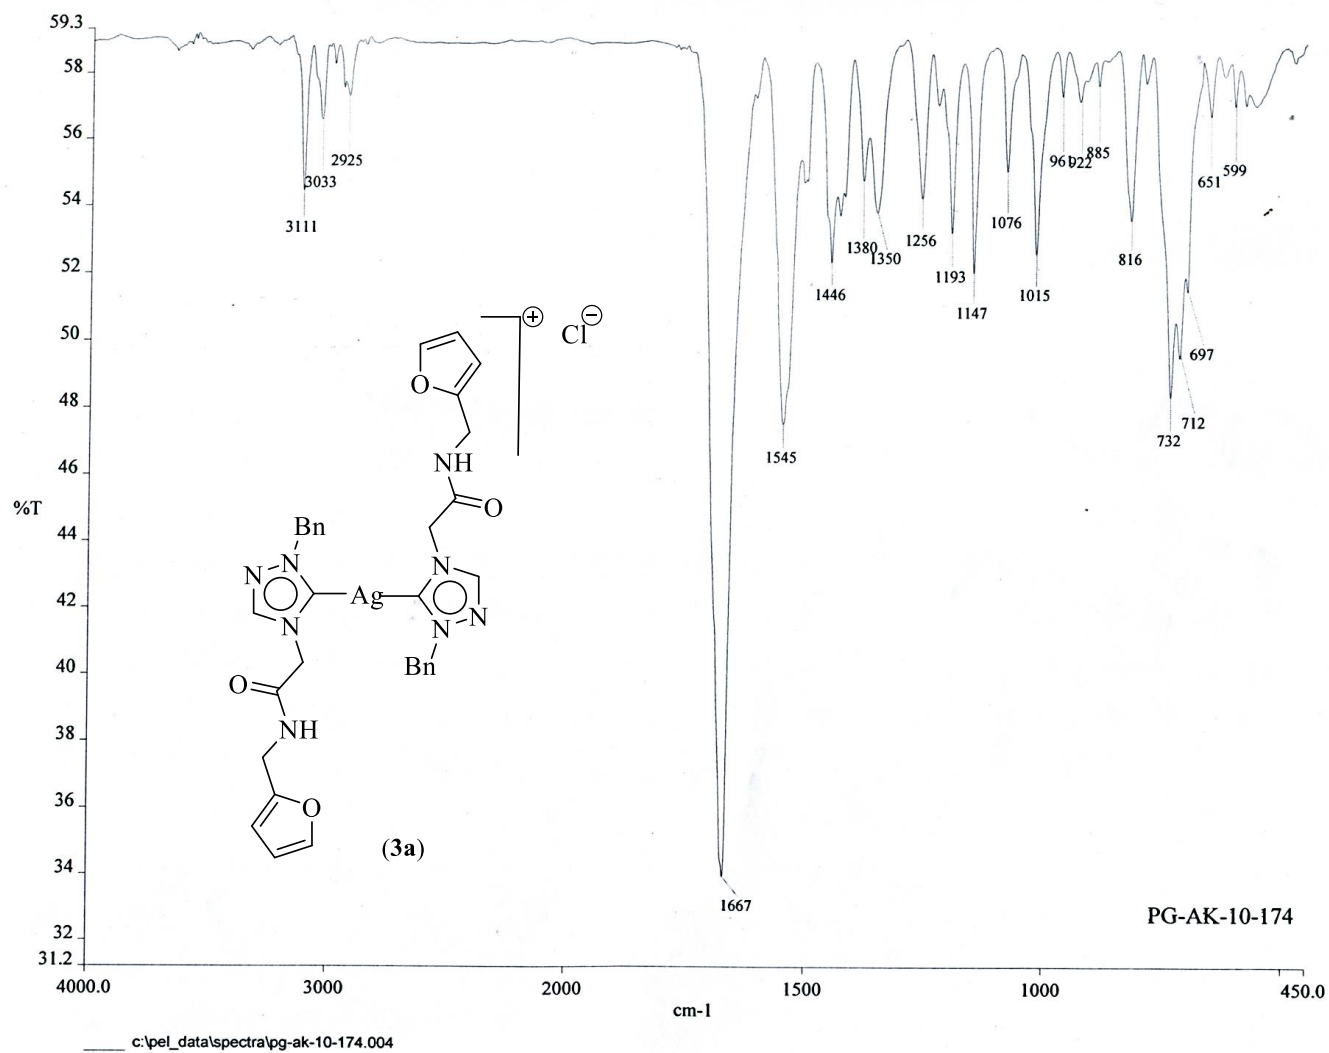

**Figure S20.** Infrared spectrum of **3a** in KBr.

DEPARTMENT OF CHEMISTRY, I.I.T.(B)

**Analysis Info**  
 Analysis Name: D:\Data\APR 15\PG-AK-11-87-1a.d  
 Method: Tune\_pos\_NAICSI\_1000.m  
 Sample Name: PG-AK-11-87-1  
 Comment: C32H32AgN8O4Cl  
 Acquisition Date: 4/24/2015 10:28:39 PM  
 Operator: DM OUT  
 Instrument: maXis impact 282001.00081

**Acquisition Parameter**

|             |         |                       |            |                  |           |
|-------------|---------|-----------------------|------------|------------------|-----------|
| Source Type | ESI     | Ion Polarity          | Positive   | Set Nebulizer    | 0.3 Bar   |
| Focus       | Active  | Set Capillary         | 3700 V     | Set Dry Heater   | 180 °C    |
| Scan Begin  | 50 m/z  | Set End Plate Offset  | -500 V     | Set Dry Gas      | 4.0 l/min |
| Scan End    | 800 m/z | Set Collision Cell RF | 1500.0 Vpp | Set Divert Valve | Source    |

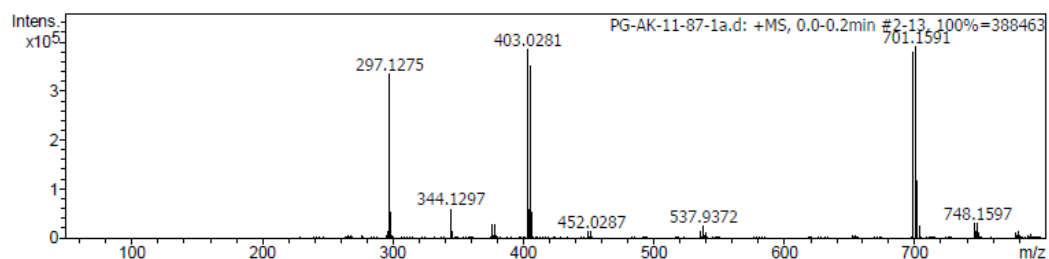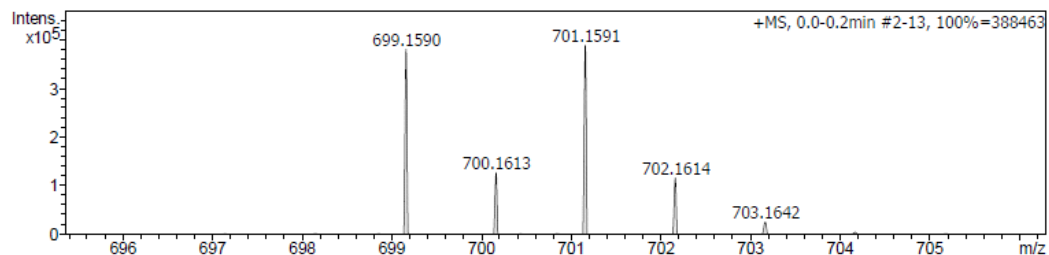

| Meas. m/z | # | Ion Formula  | m/z      | err [ppm] | mSigma | # Sigma | Score  | rdb  | e <sup>-</sup> Conf | N-Rule |
|-----------|---|--------------|----------|-----------|--------|---------|--------|------|---------------------|--------|
| 699.1590  | 1 | C32H32AgN8O4 | 699.1592 | -0.3      | 35.5   | 1       | 100.00 | 20.5 | even                | ok     |

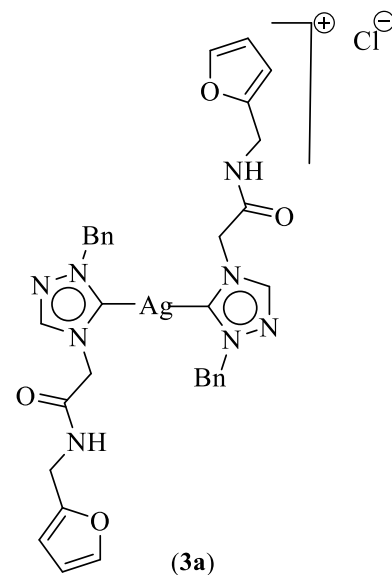

Figure S21. High Resolution Mass Spectrometry (HRMS) data of 3a.

SAIF-IIT BOMBAY

Operator ID: pradnya  
 Company name: ThermoFinnigan  
 Method filename: C:\chns-o analyser\methods\17-10-2011-chns-mth.mth  
 Method name: Nitrogen/Carbon/Hydrogen/Sulphur  
 Analysed: 10/17/2011 19:39  
 Printed: 10-18-2011 14:54  
 Elemental Analyser method:  
 Sampler method:  
 Sample ID: 17-10-2011043-PG-AK-4-26-IN (# 43)  
 Analysis type: UnkNown  
 Chromatogram filename: 17-10-2011043-PG-AK-4-26-IN.dat  
 Calibration method: K Factors  
 Sample weight: 2.809  
 Protein factor: 6.25

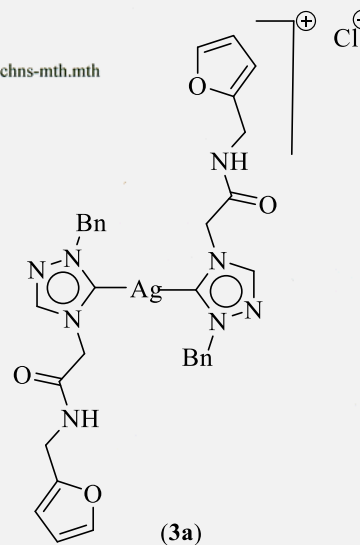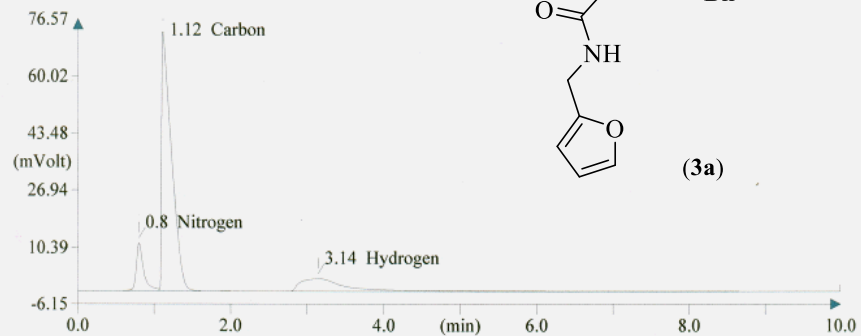

| Peak Number (#) | Retention Time (min) | Area (.1*uV*sec) | Element % | Component |
|-----------------|----------------------|------------------|-----------|-----------|
| 1               | 0.800                | 918114           | 14.075    | Nitrogen  |
| 2               | 1.117                | 6712945          | 52.232    | Carbon    |
| 3               | 3.142                | 1649722          | 4.801     | Hydrogen  |
|                 |                      | 9280780          | 71.108    |           |

Figure S22. Elemental analysis data of 3a.

PG-AK-10-167-1-1H

Current Data Parameters  
NAME PG-AK-10-167-1-1H  
EXPNO 3  
PROCNO 1

F2 - Acquisition Parameters  
Date\_ 20141109  
Time\_ 22.10  
INSTRUM spect  
PROBHD 5 mm PABBO BB/  
PULPROG zg30  
TD 66174  
SOLVENT CDC13  
NS 18  
DS 2  
SWH 11029.412 Hz  
FIDRES 0.166673 Hz  
AQ 2.9998879 sec  
RG 30.72  
DW 45.333 usec  
DE 6.50 usec  
TE 297.6 K  
D1 1.00000000 sec  
TD0 1

==== CHANNEL f1 =====  
SFO1 500.1330885 MHz  
NUC1 1H  
P1 13.00 usec  
PLW1 13.00000000 W

F2 - Processing parameters  
SI 65536  
SF 500.1300130 MHz  
WDW EM  
SSB 0  
LB 0.30 Hz  
GB 0  
PC 1.00

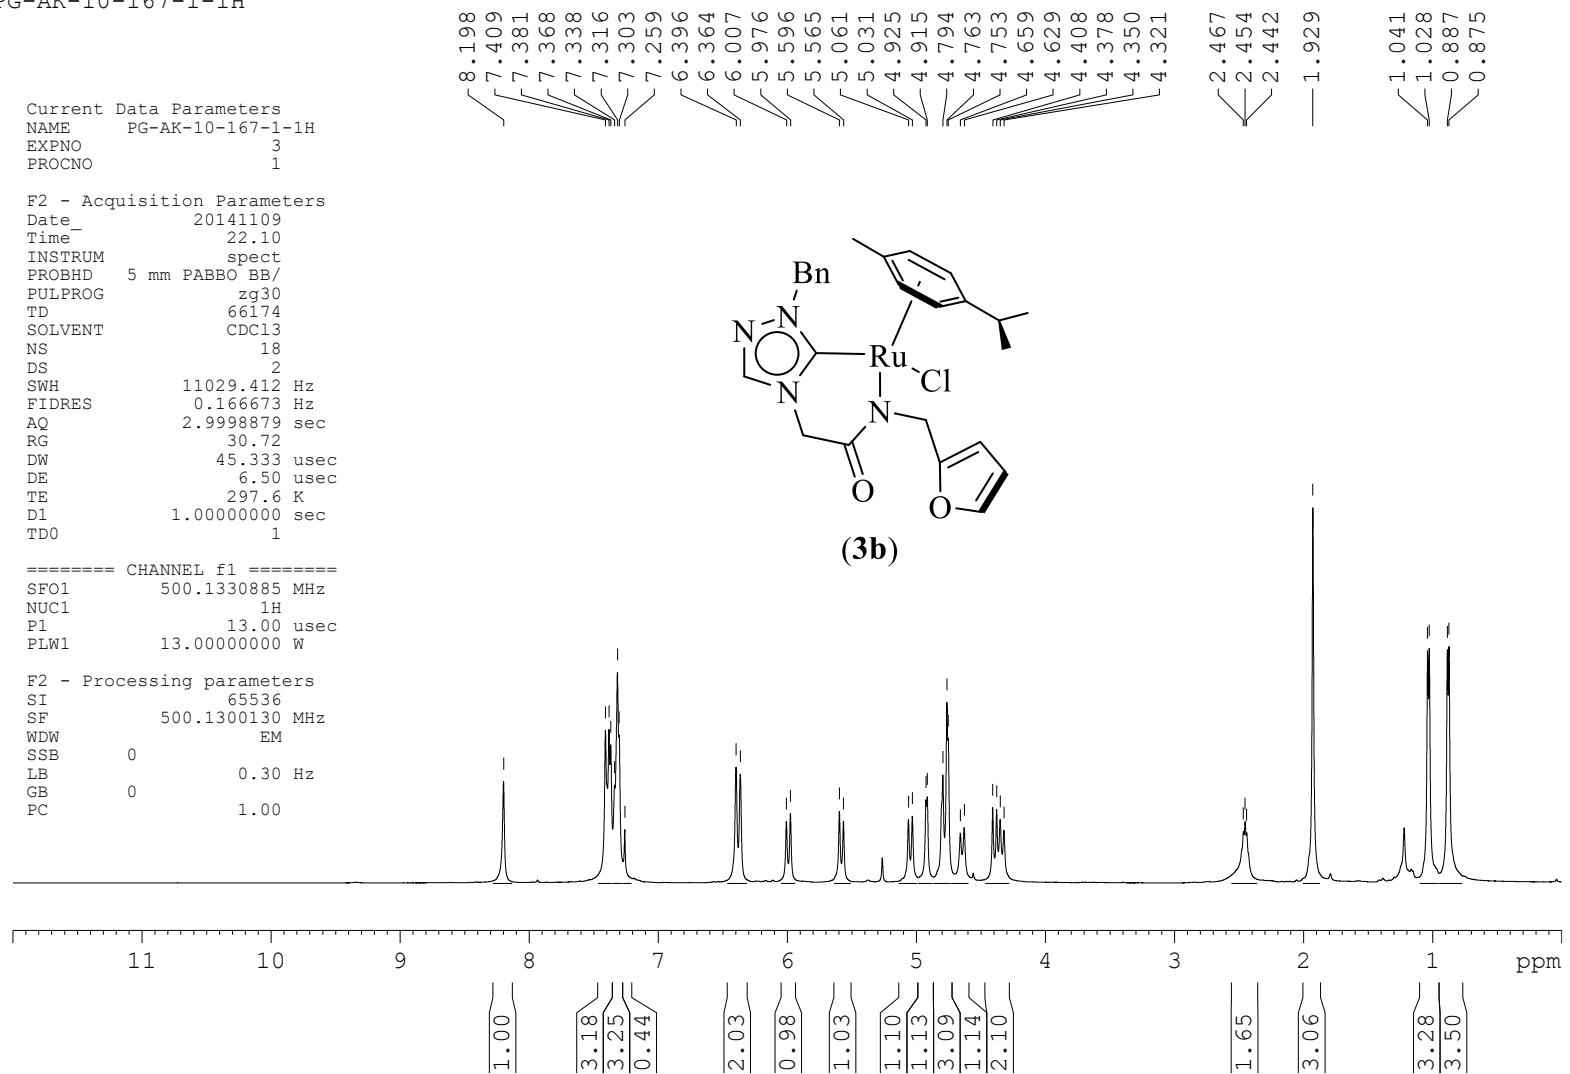

Figure S23. <sup>1</sup>H NMR spectrum of **3b** in CDCl<sub>3</sub>.

PG-AK-10-167-1-1H

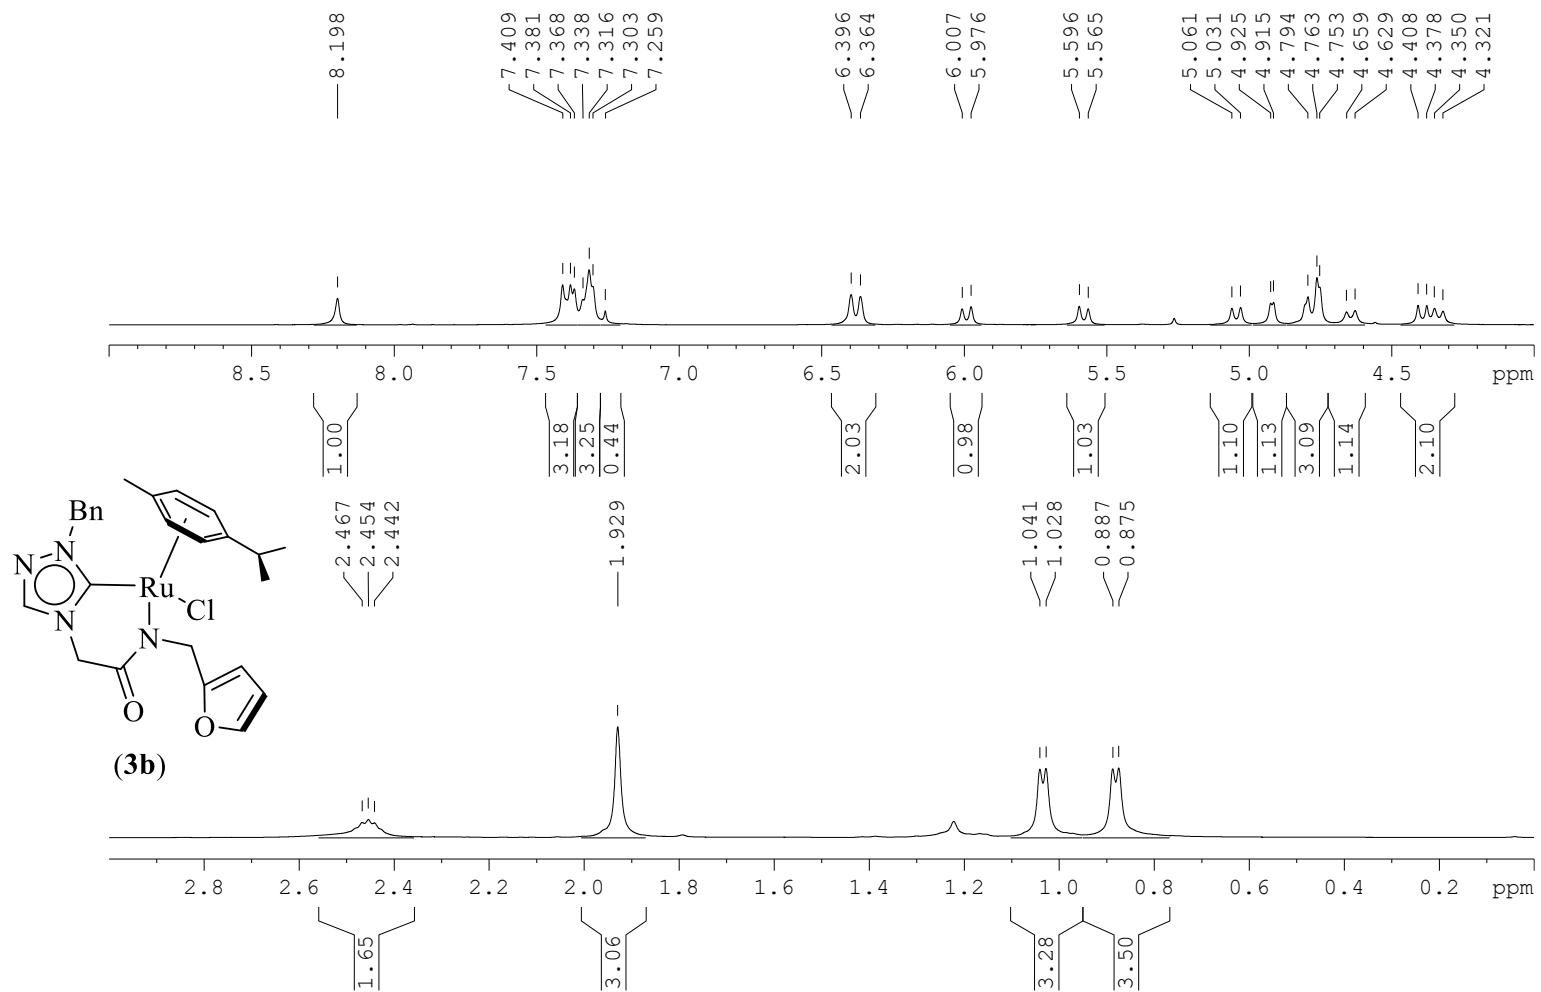

**Figure S24.** Expanded  $^1\text{H}$  NMR spectrum of **3b** in  $\text{CDCl}_3$ .

PG-AK-10-167-1-13C

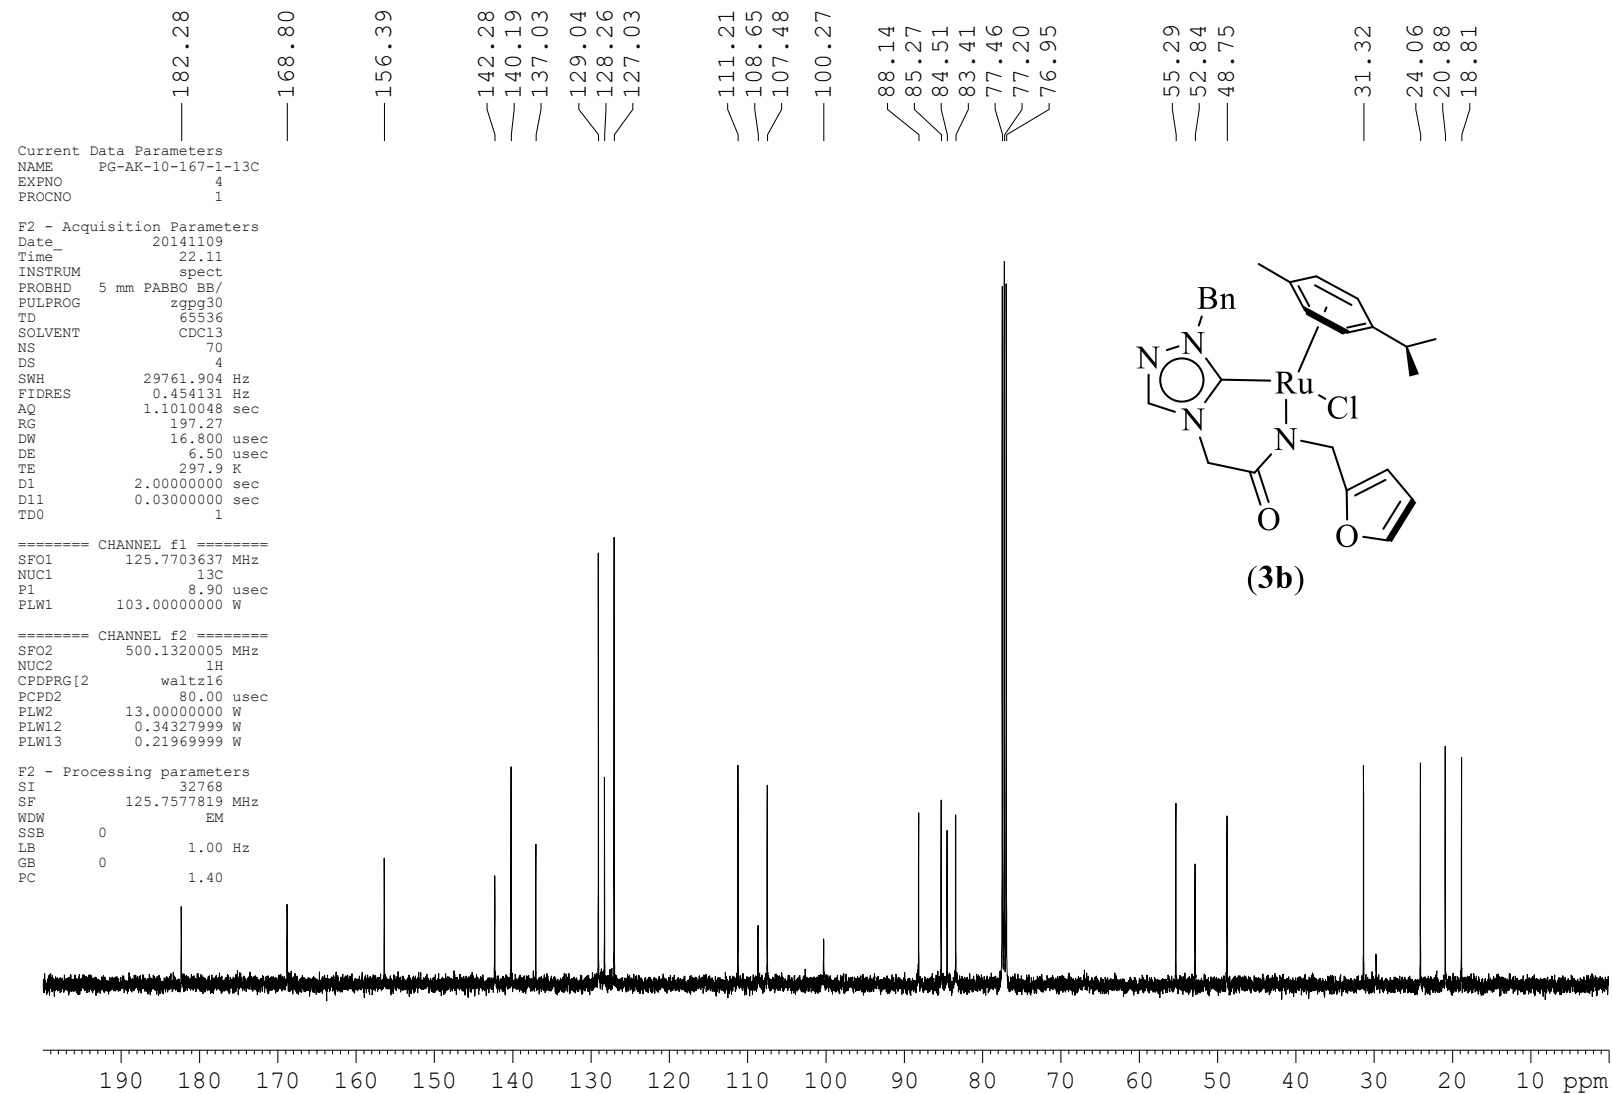

Figure S25.  $^{13}\text{C}\{^1\text{H}\}$  NMR spectrum of **3b** in  $\text{CDCl}_3$ .

PG-AK-10-167-1-13C

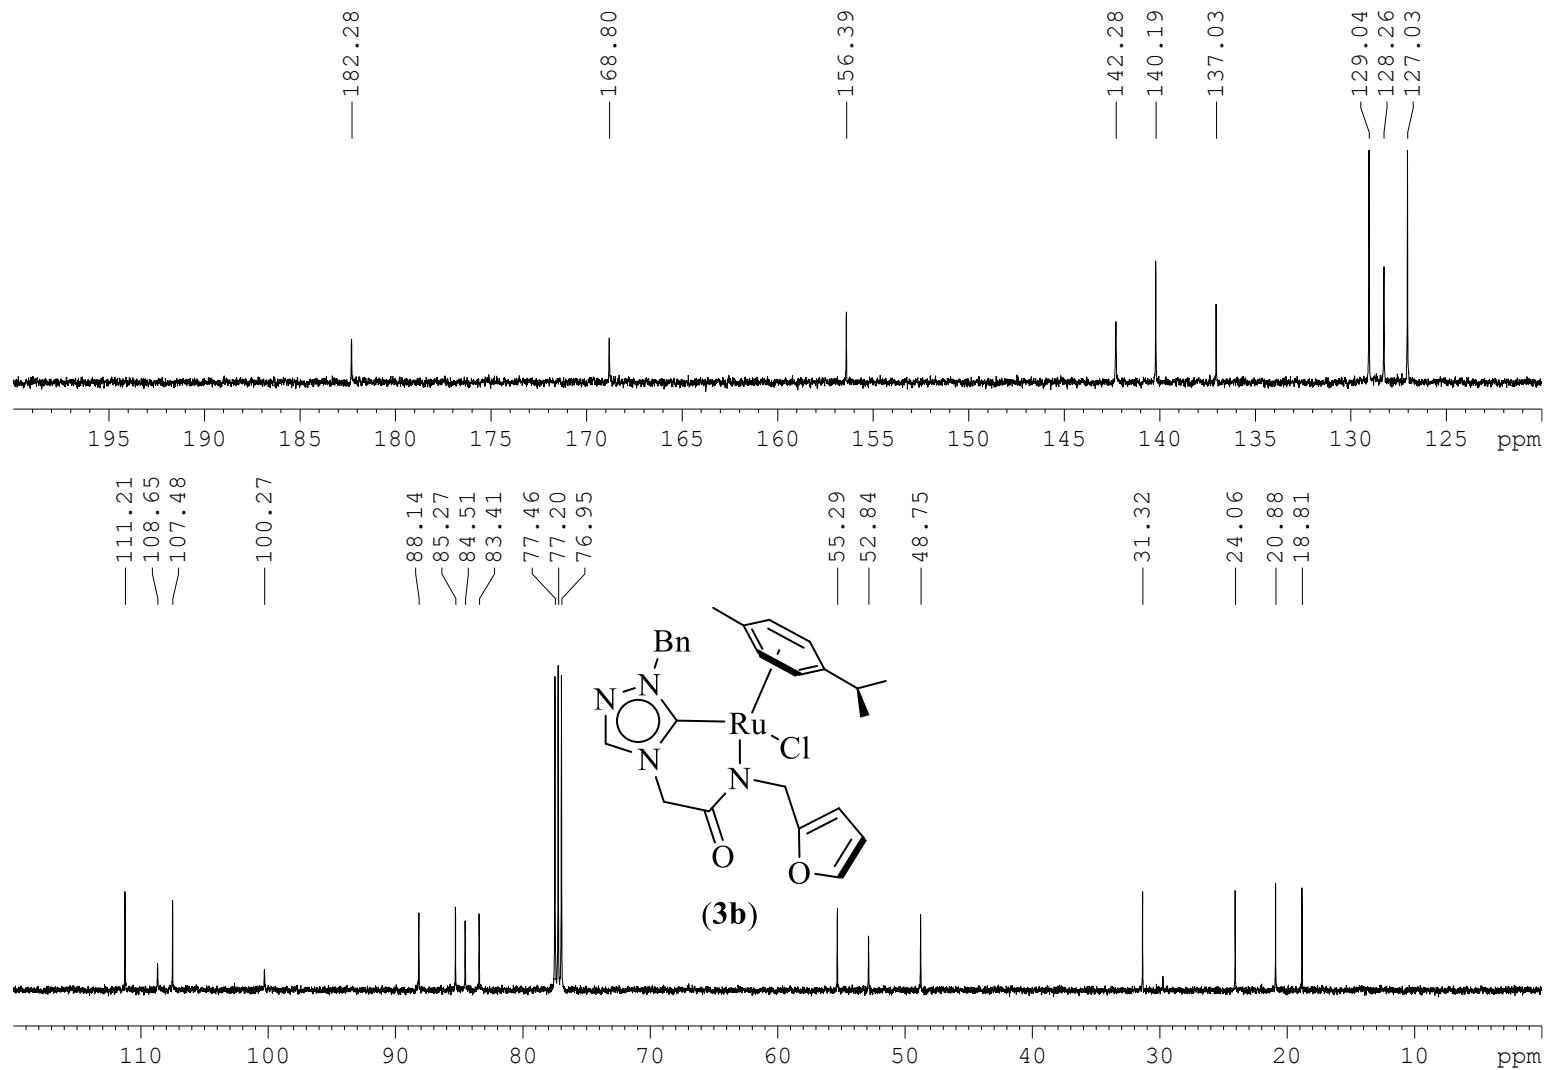

**Figure S26.** Expanded  $^{13}\text{C}\{^1\text{H}\}$  NMR spectrum of **3b** in  $\text{CDCl}_3$ .



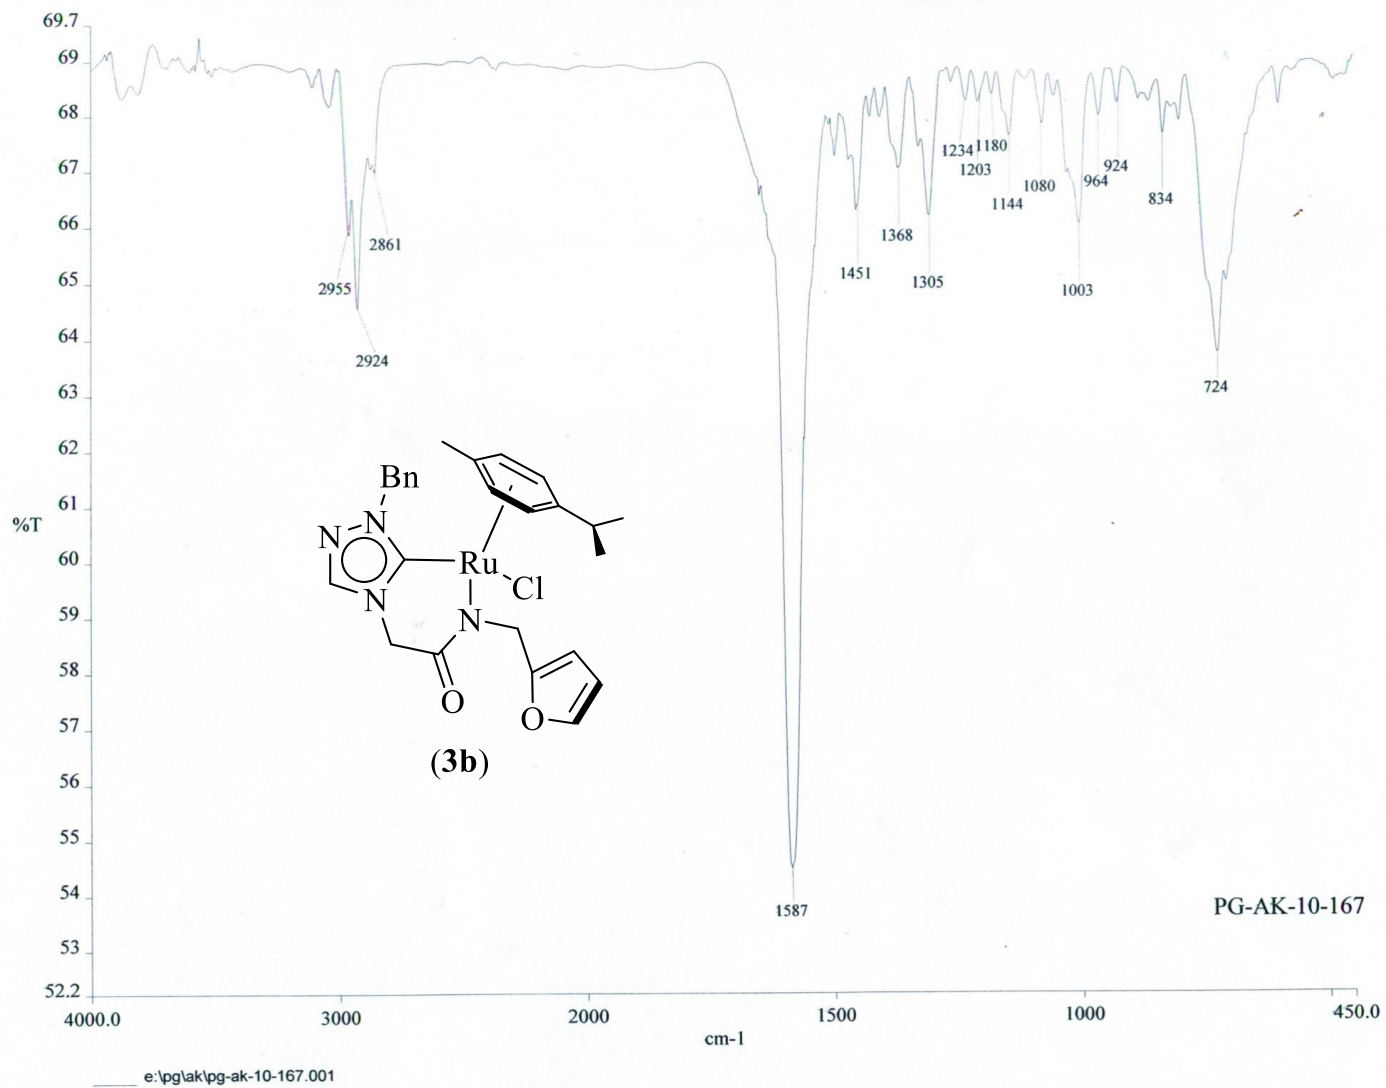

Figure S27. Infrared spectrum of **3b** in KBr.

DEPARTMENT OF CHEMISTRY, I.I.T.(B)

**Analysis Info** Acquisition Date 11/22/2014 8:34:35 PM  
 Analysis Name D:\Data\NOV-14\PG-AK-10-167-1.d  
 Method Tune\_pos\_NAICSI-1000.m Operator PG CS IN  
 Sample Name PG-AK-10-167-1 Instrument maXis impact 282001.00081  
 Comment C26H29ClN4O2Ru

**Acquisition Parameter**  
 Source Type ESI Ion Polarity Positive Set Nebulizer 0.3 Bar  
 Focus Active Set Capillary 3800 V Set Dry Heater 180 °C  
 Scan Begin 50 m/z Set End Plate Offset -500 V Set Dry Gas 4.0 l/min  
 Scan End 700 m/z Set Collision Cell RF 1500.0 Vpp Set Divert Valve Source

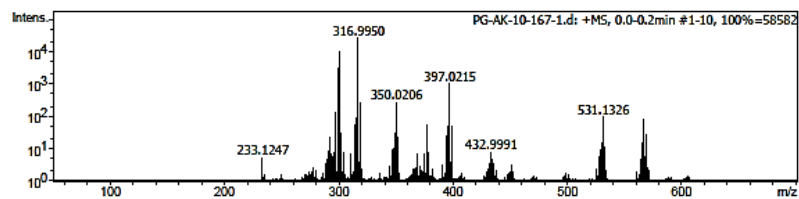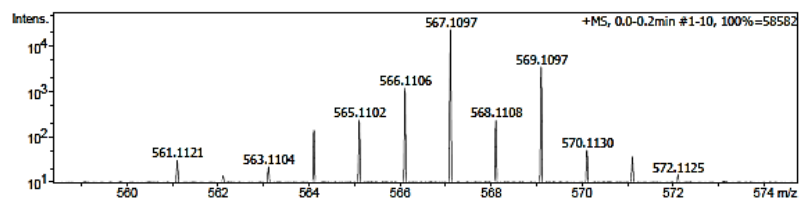

| Meas. m/z | # | Ion Formula    | m/z      | err [ppm] | mSigma | # Sigma | Score  | rdB  | e <sup>-</sup> Conf | N-Rule |
|-----------|---|----------------|----------|-----------|--------|---------|--------|------|---------------------|--------|
| 567.1097  | 1 | C26H30ClN4O2Ru | 567.1099 | -0.4      | 7.8    | 1       | 100.00 | 14.0 | odd                 | -      |

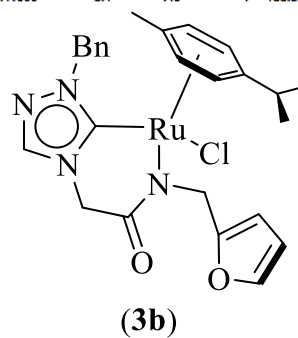

Figure S28. High Resolution Mass Spectrometry (HRMS) data of 3b.

## Eager 300 Report

Page: 1 Sample: AK-2-125-3 (AK-2-125-3)

Method Name : SP060111  
Method File : D:\CHNS2011\SP060111.mth  
Chromatogram : AK-2-125-3  
Operator ID : sks  
Analysed : 01/05/2011 16:22  
Sample ID : AK-2-125-3 (# 23)  
Analysis Type : UnkNown (Area)  
Company Name : C.E. Instruments  
Printed : 1/5/2011 18:51  
Instrument N. : Instrument #1  
Sample weight : .699

Calib. method : using 'K Factors'

!!! Warning missing one or more peaks.

| Element Name | %       | Ret.Time | Area    | BC | Area ratio | K factor    |
|--------------|---------|----------|---------|----|------------|-------------|
| Nitrogen     | 10.5058 | 43       | 106385  | FU | 8.718644   | .144868E+07 |
| Carbon       | 54.3813 | 66       | 927536  | FU | 1.000000   | .244008E+07 |
| Hydrogen     | 5.5634  | 172      | 224030  | RS | 4.140230   | .545526E+07 |
| Totals       | 70.4505 |          | 1257951 |    |            |             |

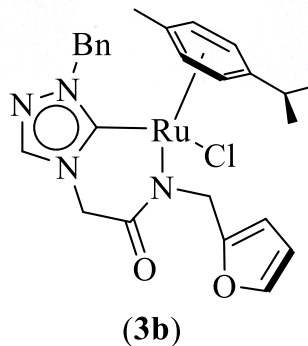

Figure S29. Elemental analysis data of 3b.

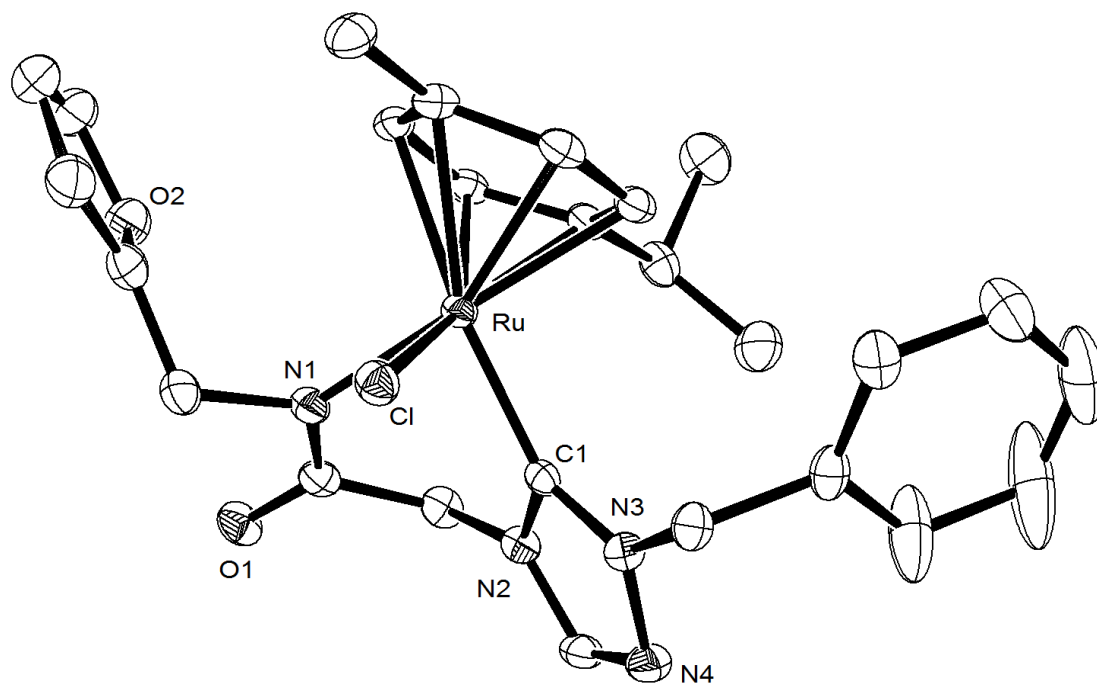

**Figure S30.** ORTEP diagram of **3b** with thermal ellipsoids are shown at the 50 % probability level. Selected bond lengths (Å) and angles (°): Ru1–C1 2.016(3), Ru–N1 2.131(2), Ru1–Cl 2.4347(7), C1–Ru–N1 82.74(10), N1–Ru–Cl1 87.71(7).

PG-ST-02-170-02-1H

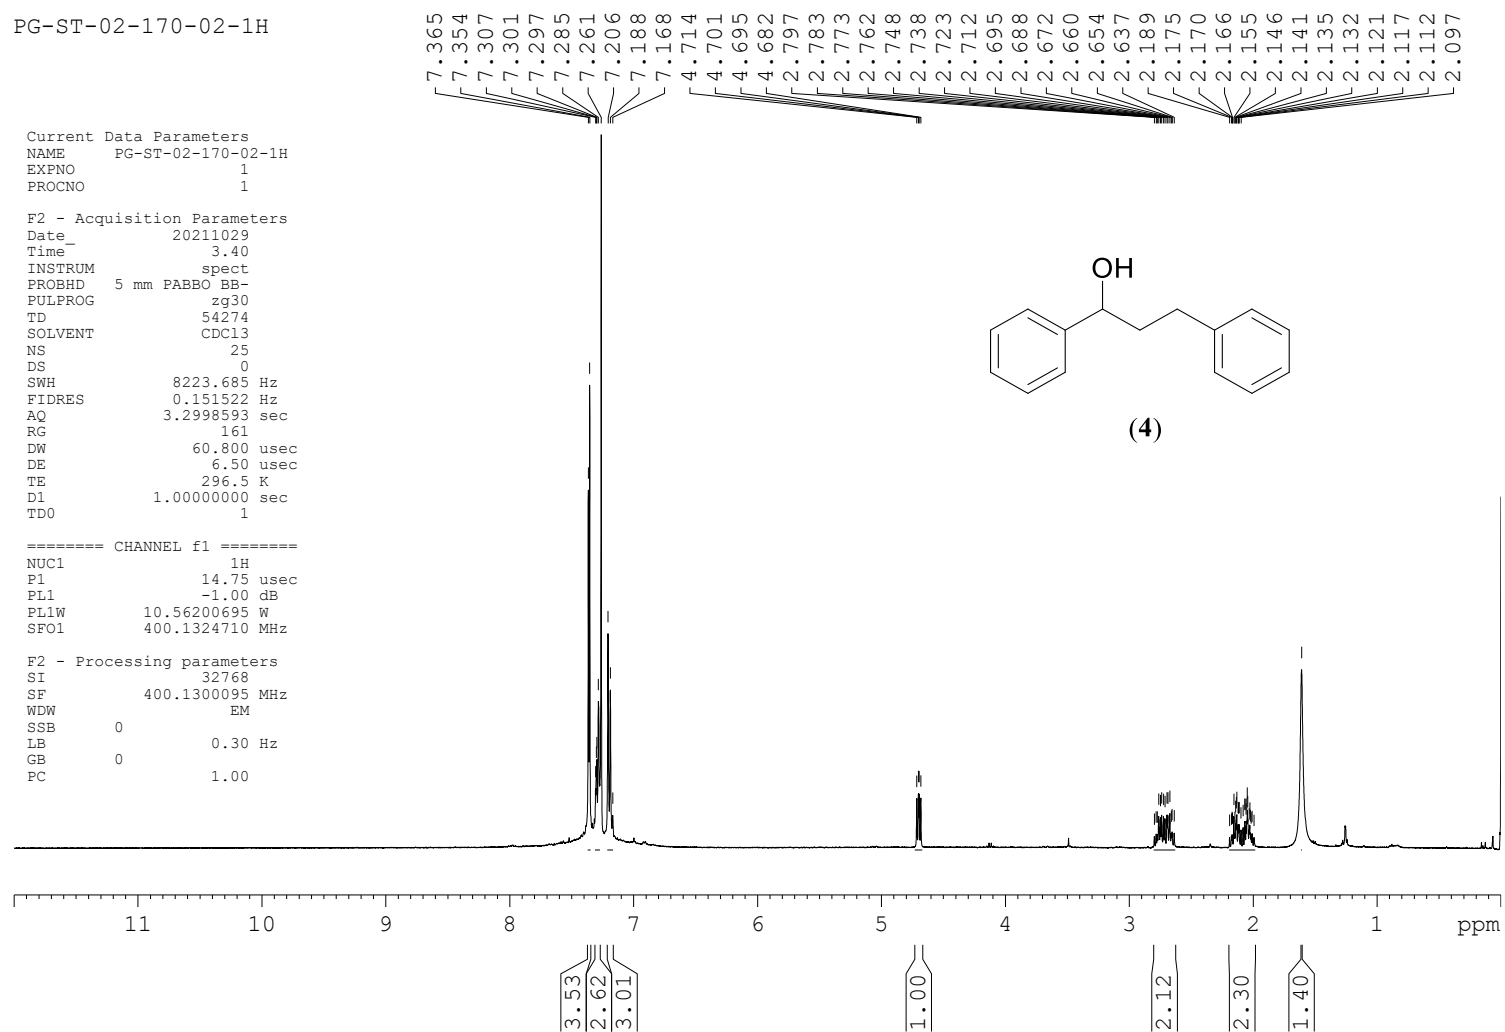

Figure S31.  $^1\text{H}$  NMR spectrum of (4) in  $\text{CDCl}_3$ .

PG-ST-02-170-02-1H

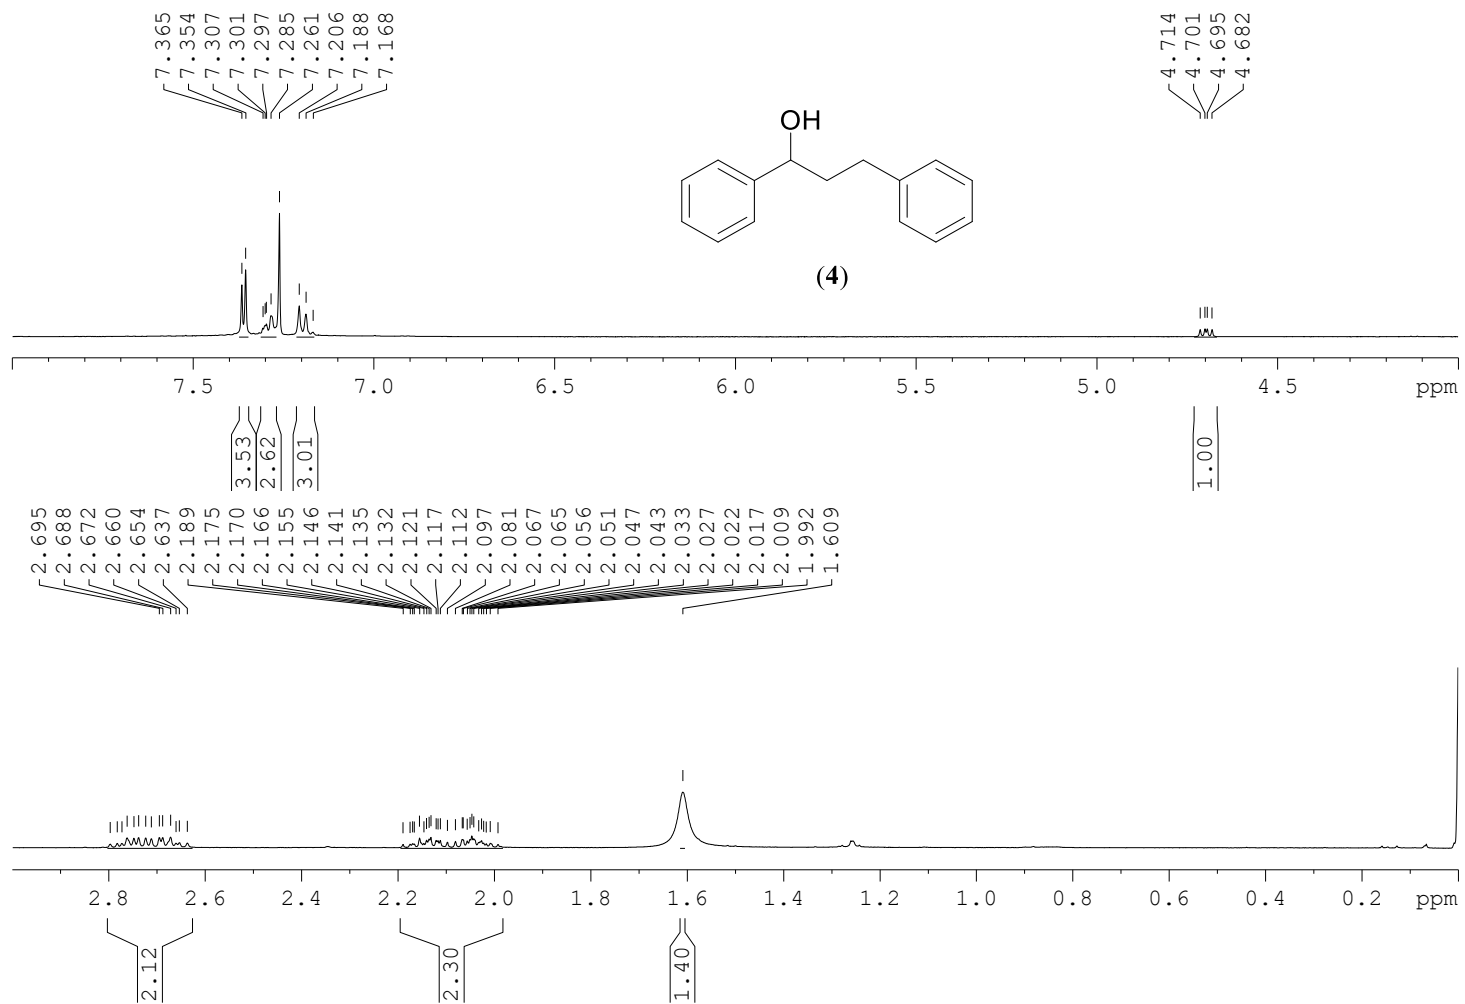

Figure S32. Expanded <sup>1</sup>H NMR spectrum of (4) in CDCl<sub>3</sub>.

PG-ST-02-170-02-13C-1

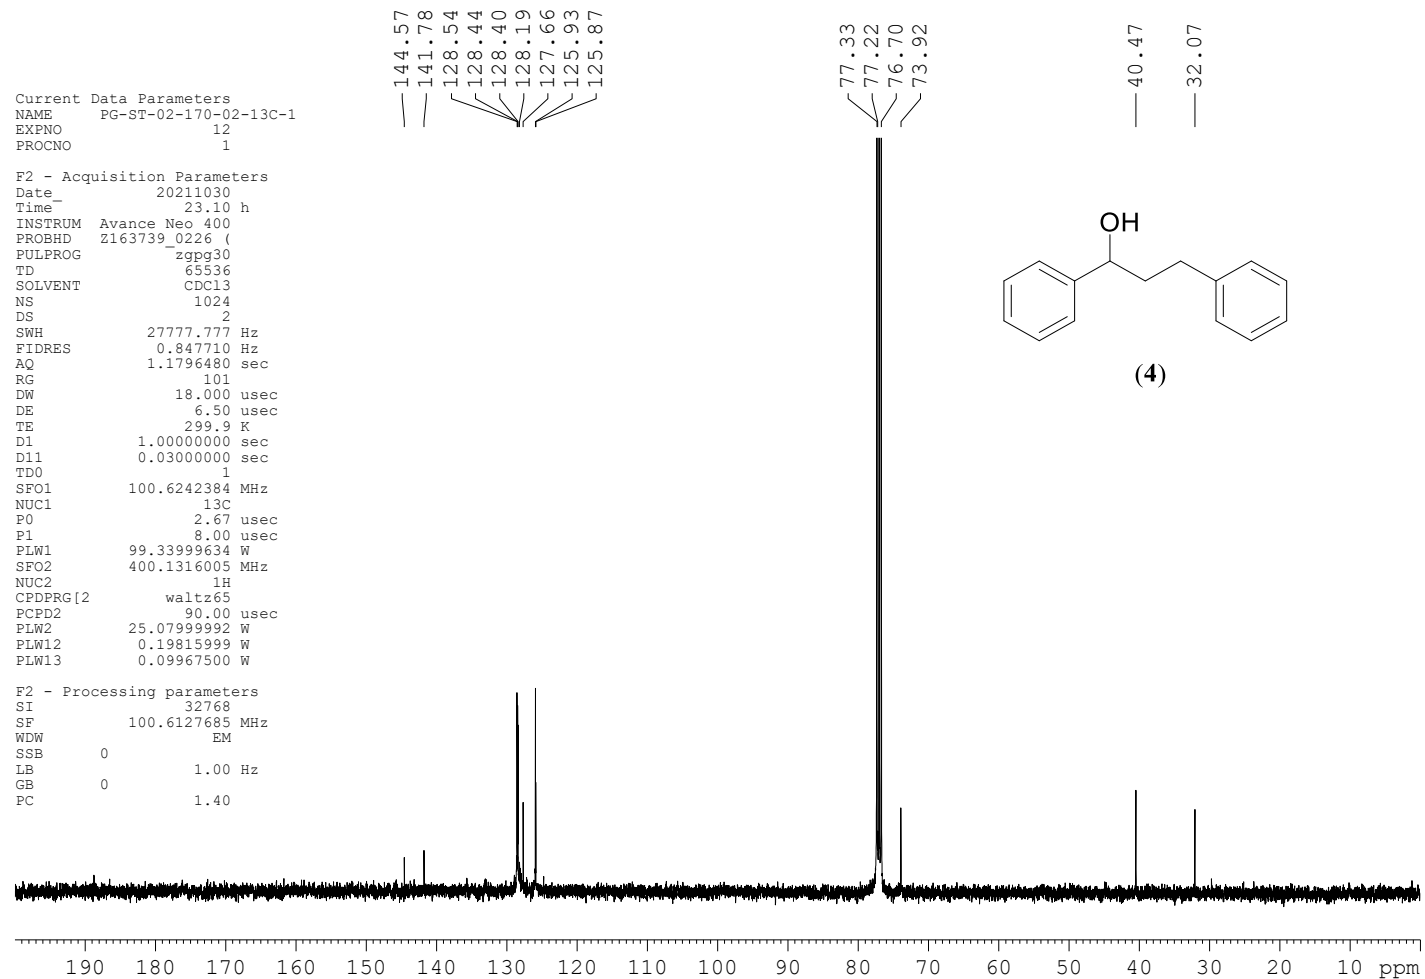

Figure S33.  $^{13}\text{C}\{^1\text{H}\}$  NMR spectrum of (4) in  $\text{CDCl}_3$ .

PG-ST-02-170-02-13C-1

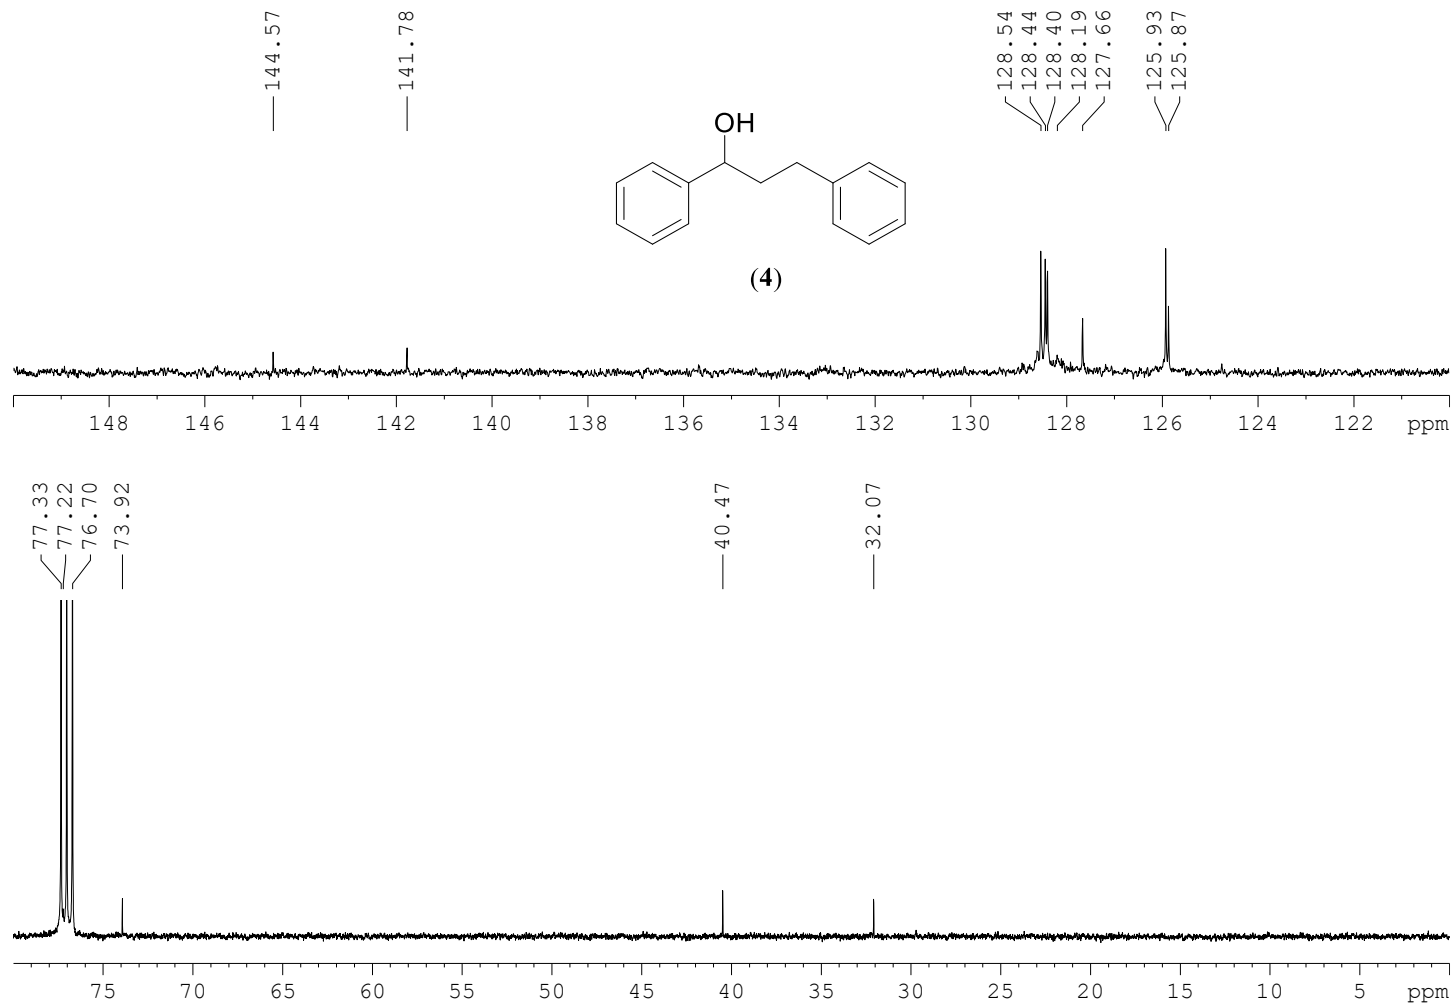

**Figure S34.** Expanded  $^{13}\text{C}\{^1\text{H}\}$  NMR spectrum of (4) in  $\text{CDCl}_3$ .



File :F:\GCMS-DATA-2021\OCT2021\PG-ST-02-170-02.D  
Operator : SRD  
Acquired : 28 Oct 2021 14:07 using AcqMethod COMMONMETHOD-2020.M  
Instrument : GCMS  
Sample Name: PG-ST-02-170-02  
Misc Info :  
Vial Number: 5

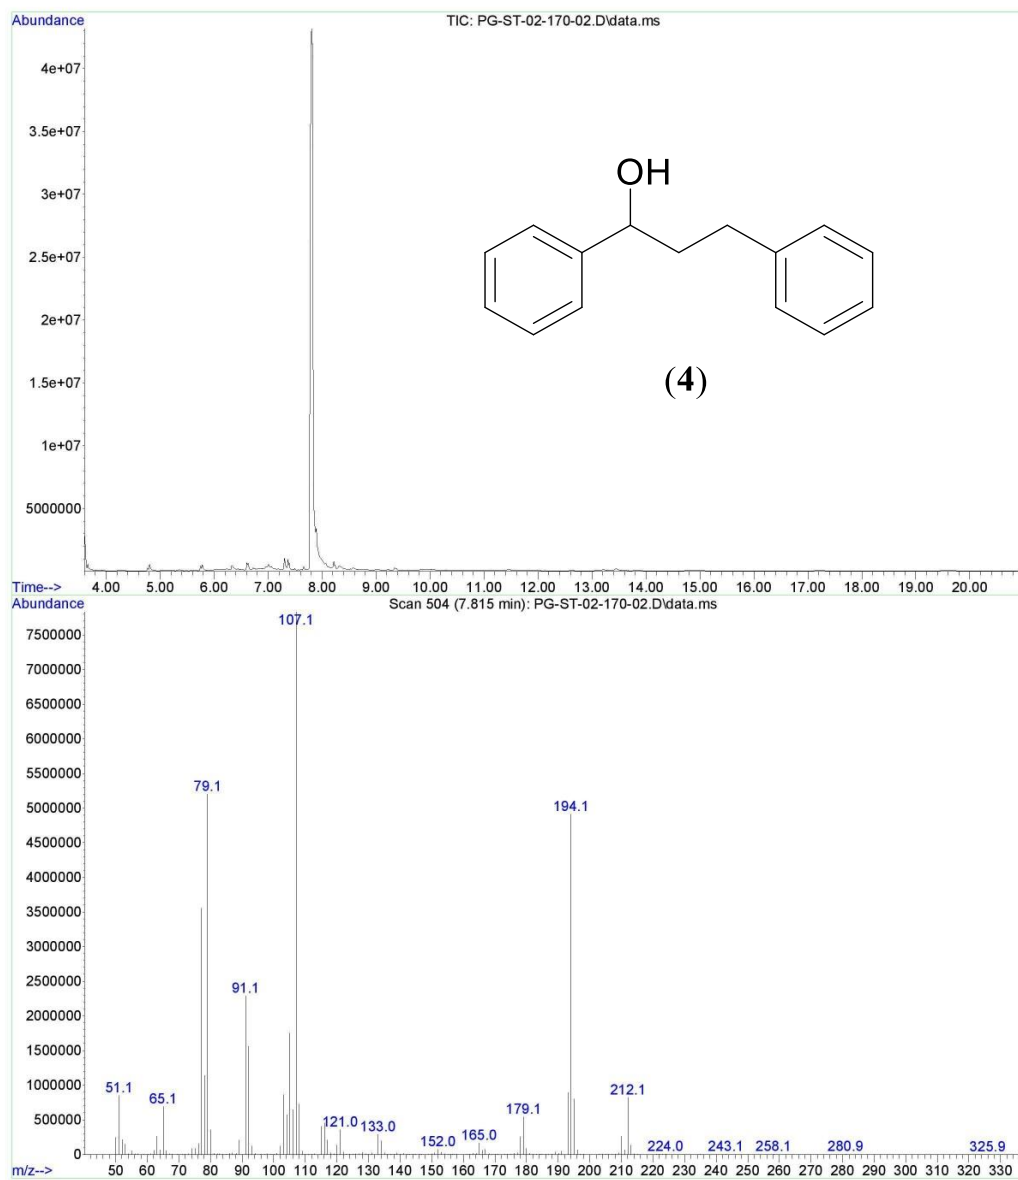

**Figure S35.** GCMS trace in EtOAc of (4) showing the  $M^+$  peak at  $m/z$  212.

SP18022016  
varioMICRO CHNS  
serial number: 15154051

Graphic report

| No. | Weight [mg] | Name             | Method     | N Area | C Area | H Area | N [%] | C [%] | H [%] | Date       | Time  | Info |
|-----|-------------|------------------|------------|--------|--------|--------|-------|-------|-------|------------|-------|------|
| 21  | 1.3910      | PG-ST-02-170-2-1 | 2mgChem80s | 2 951  | 33 455 | 10 033 | 0.00  | 85.72 | 7.122 | 21-01-2022 | 16:16 | Su   |

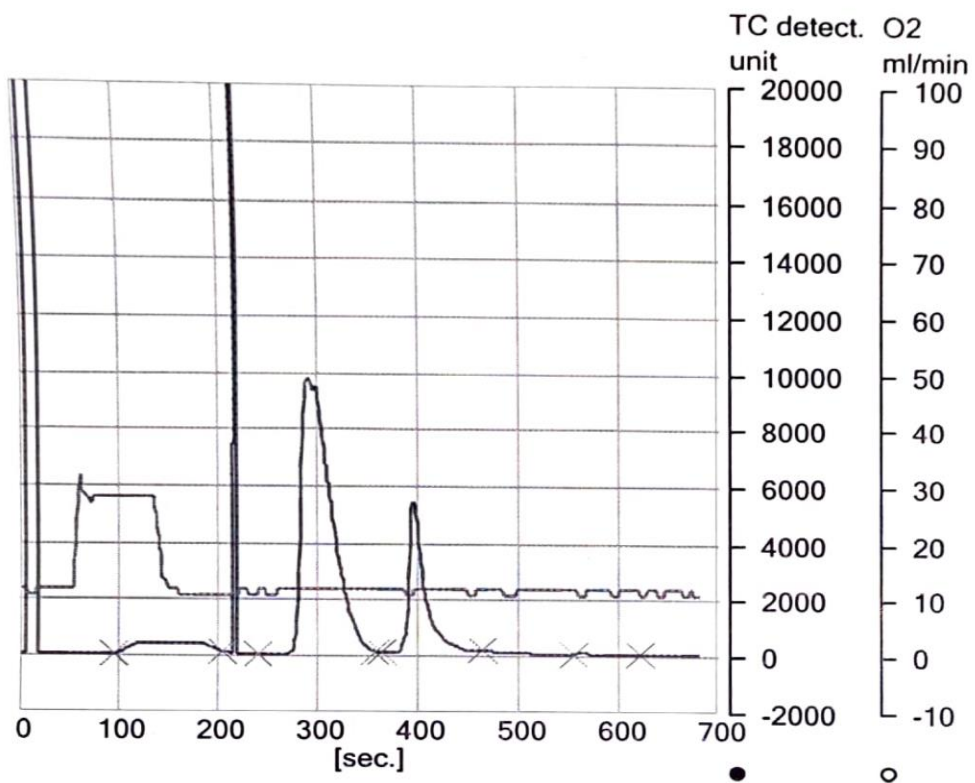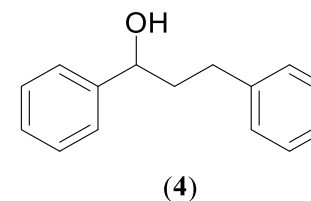

Figure S36. Elemental analysis data of (4).

PG-ST-02-170-01-1H

Current Data Parameters  
NAME PG-ST-02-170-01-1H  
EXPNO 1  
PROCNO 1

F2 - Acquisition Parameters  
Date\_ 20211027  
Time\_ 21.46  
INSTRUM spect  
PROBHD 5 mm PABBO BB/  
PULPROG zg30  
TD 65536  
SOLVENT CDCl3  
NS 18  
DS 0  
SWH 10000.000 Hz  
FIDRES 0.152588 Hz  
AQ 3.2767999 sec  
RG 134.65  
DW 50.000 usec  
DE 6.50 usec  
TE 295.6 K  
D1 1.00000000 sec  
TD0 1

===== CHANNEL f1 =====  
SFO1 500.1330885 MHz  
NUC1 1H  
P1 13.35 usec  
PLW1 16.00000000 W

F2 - Processing parameters  
SI 65536  
SF 500.1300000 MHz  
WDW EM  
SSB 0  
LB 0.30 Hz  
GB 0  
PC 1.00

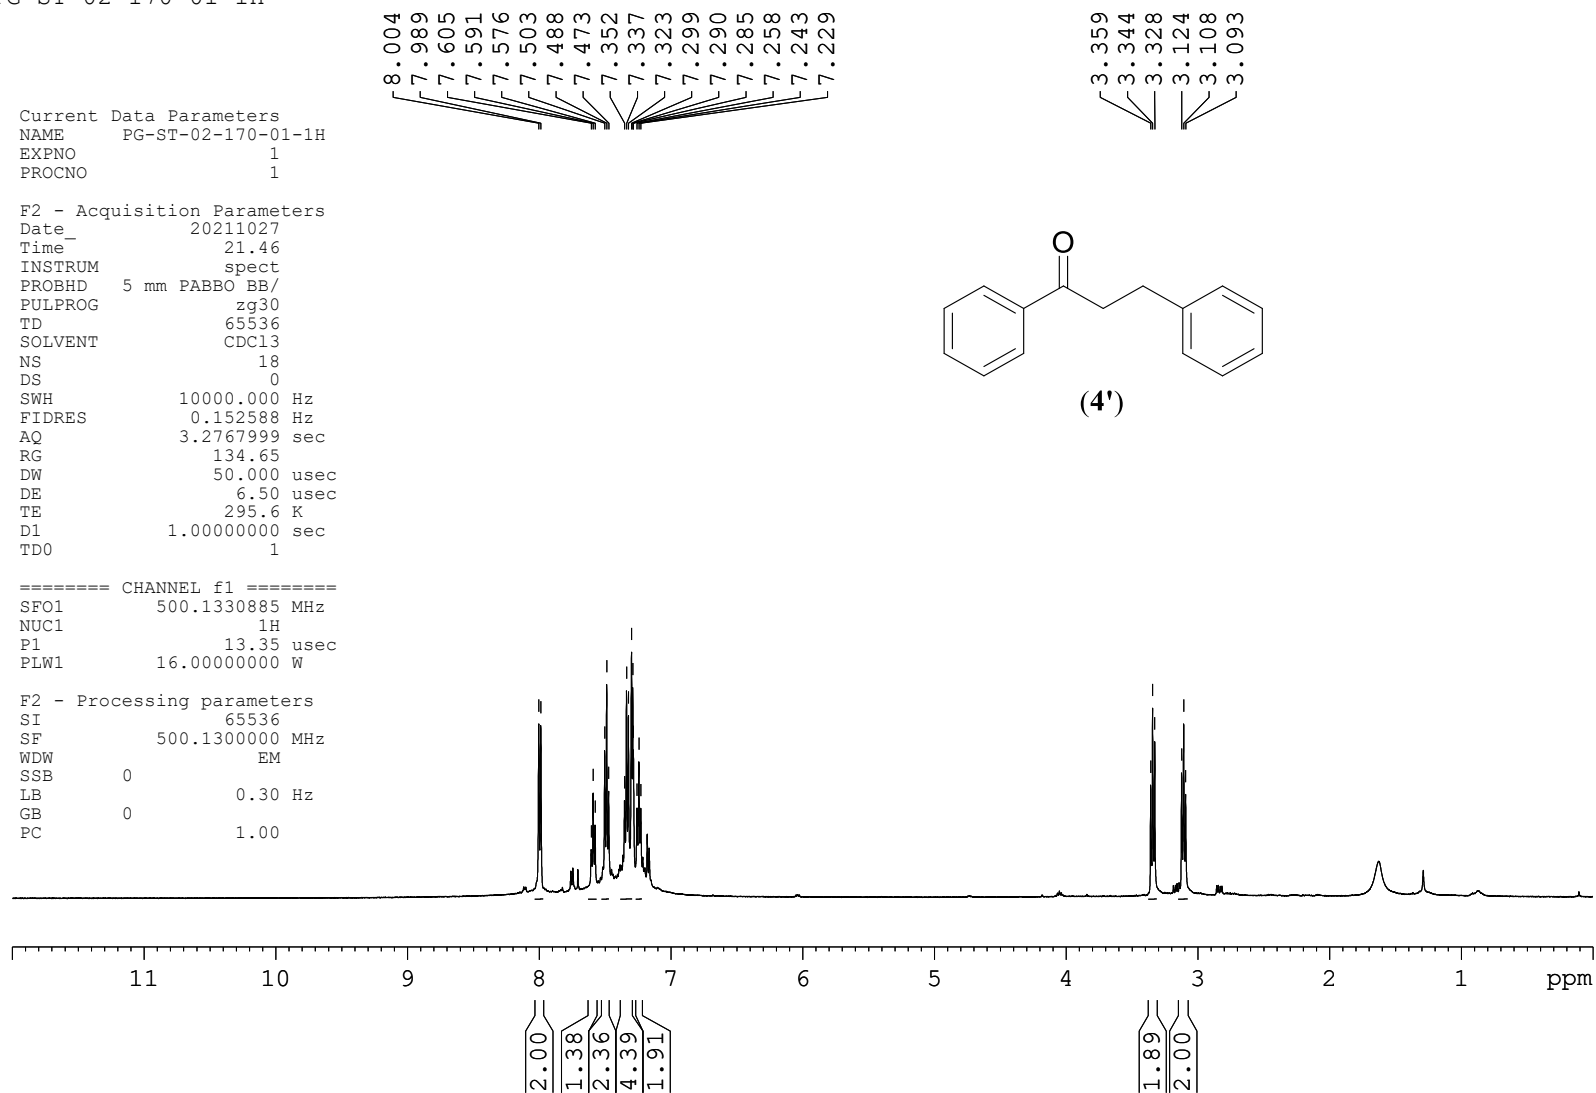

Figure S37.  $^1\text{H}$  NMR spectrum of (4') in  $\text{CDCl}_3$ .

PG-ST-02-170-01-1H

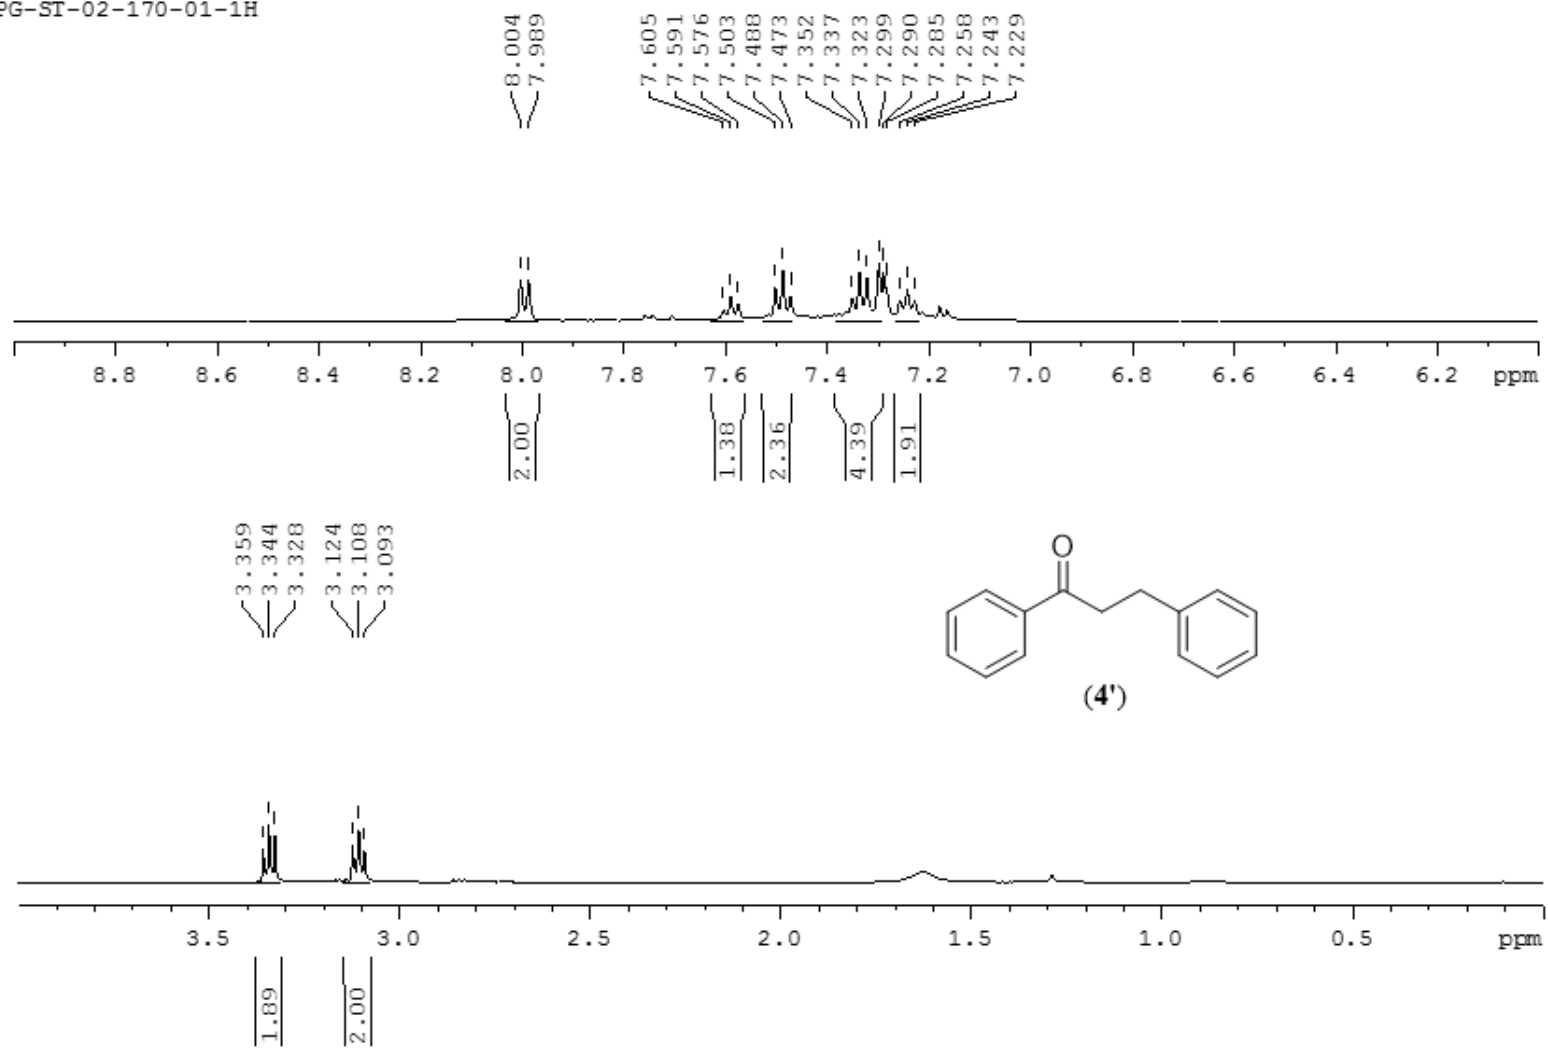

**Figure S38.** Expanded  $^1\text{H}$  NMR spectrum of (4') in  $\text{CDCl}_3$ .

PG-ST-02-170-01-13C-01

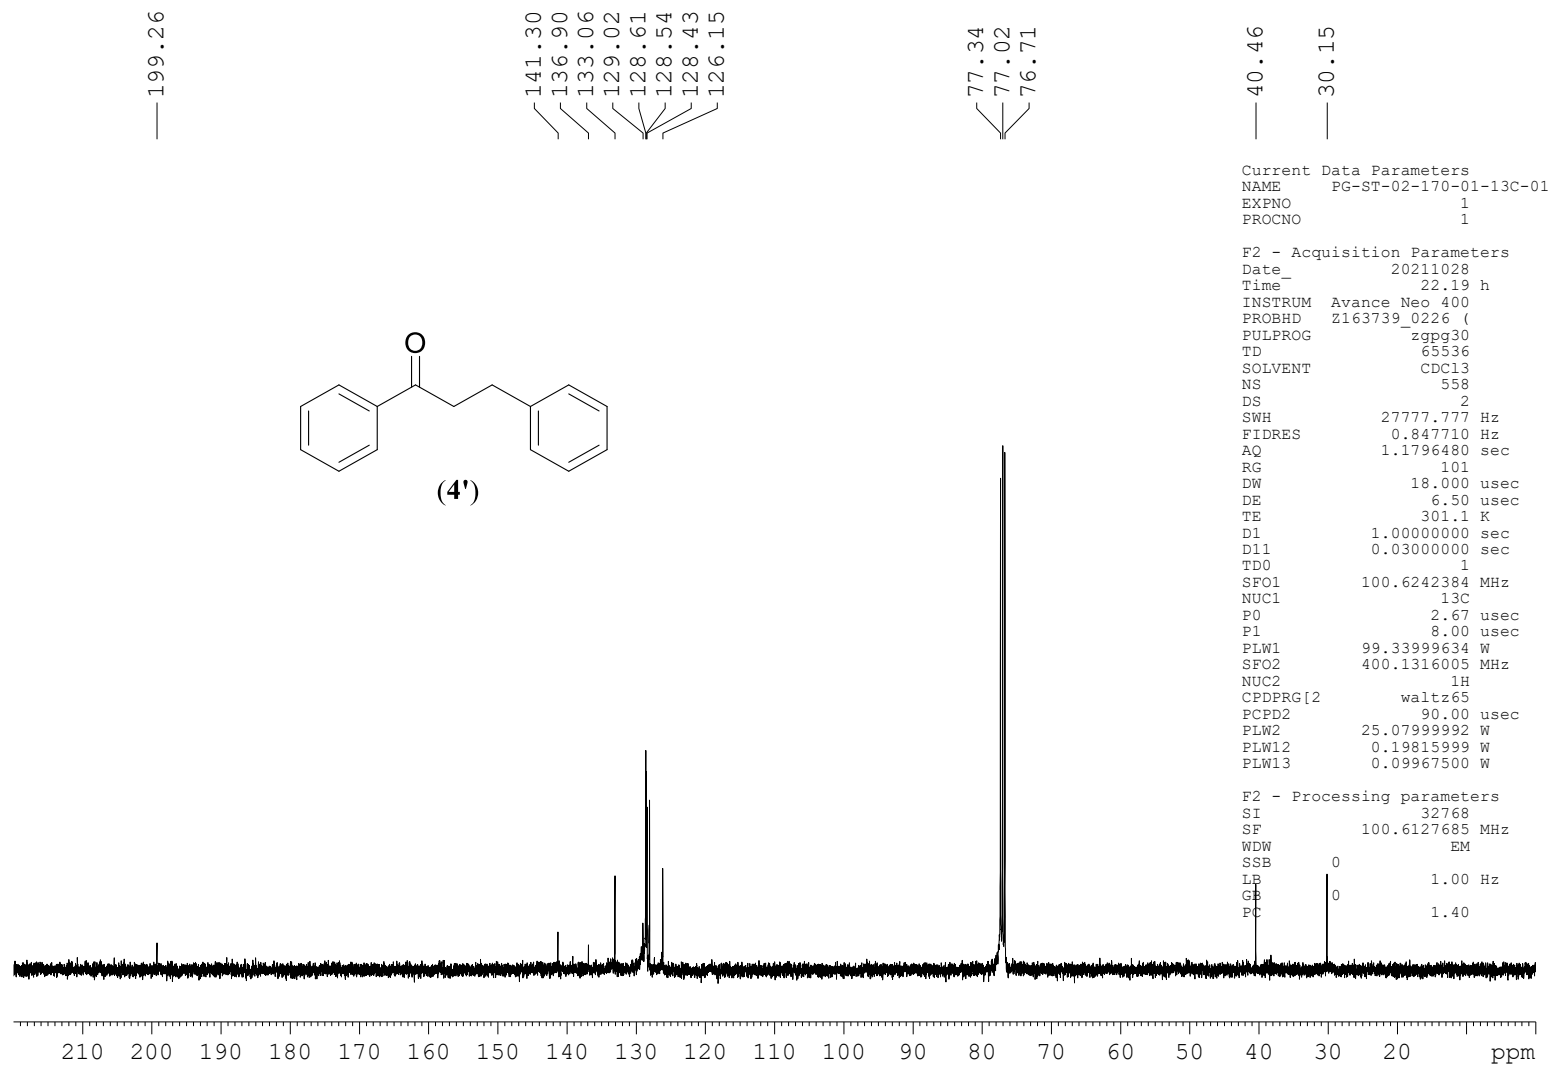

Figure S39.  $^{13}\text{C}\{^1\text{H}\}$  NMR spectrum of (4') in  $\text{CDCl}_3$ .

PG-ST-02-170-01-13C-01

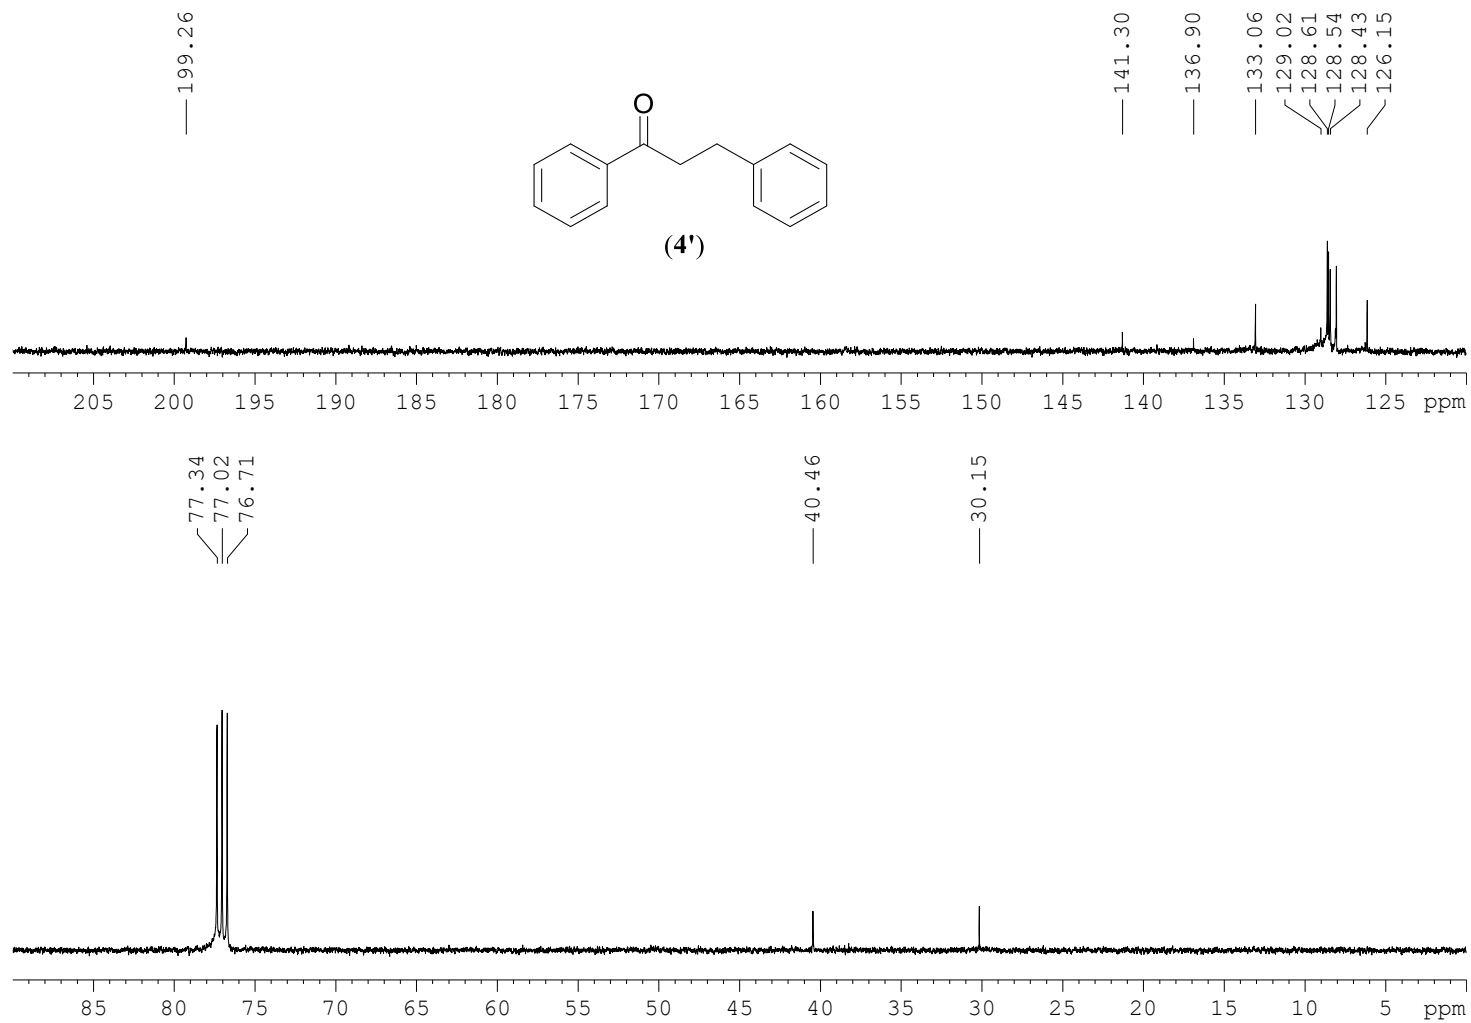

**Figure S40.** Expanded  $^{13}\text{C}\{^1\text{H}\}$  NMR spectrum of (4') in  $\text{CDCl}_3$ .

File : F:\GCMS-DATA-2021\OCT2021\PG-ST-02-170-01.D  
Operator : SRD  
Acquired : 28 Oct 2021 14:32 using AcqMethod COMMONMETHOD-2020.M  
Instrument : GCMS  
Sample Name: PG-ST-02-170-01  
Misc Info :  
Vial Number: 6

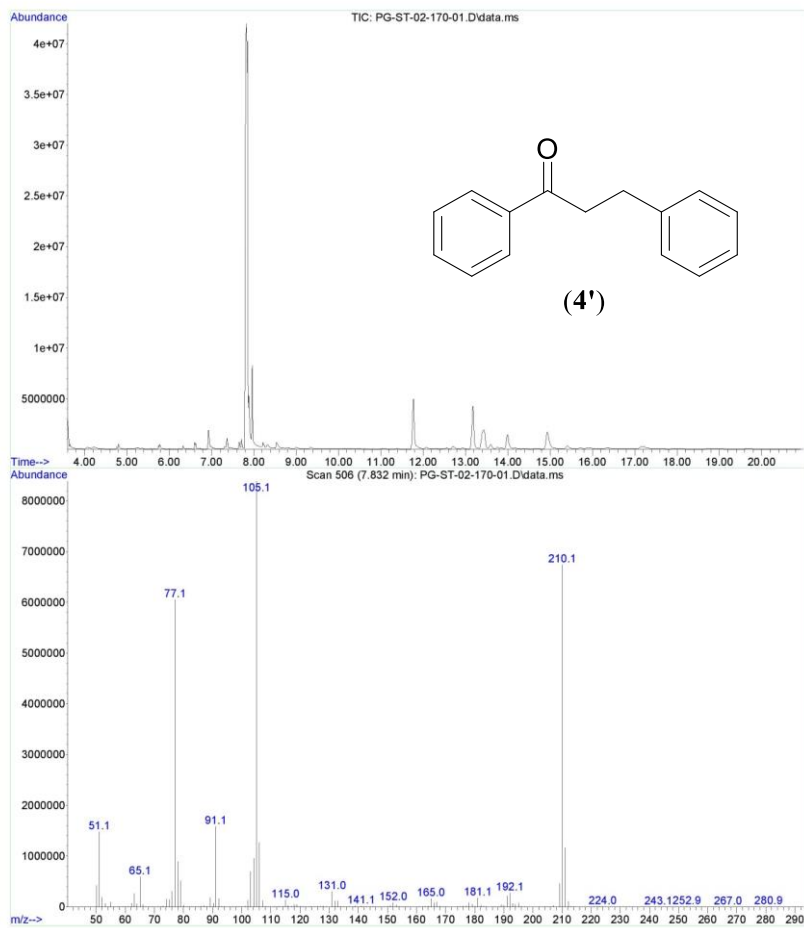

**Figure S41.** GCMS trace in EtOAc of (4') showing the  $M^+$  peak at  $m/z$  210.

Document: CHNS11112021 (varioMICRO) from: 12-11-2021 10:04:06

SP18022016  
varioMICRO CHNS  
serial number: 15154051

Graphic report

| No. | Weight [mg] | Name           | Method     | N Area | C Area | H Area | N [%] | C [%] | H [%] | Date       | Time  | Info |
|-----|-------------|----------------|------------|--------|--------|--------|-------|-------|-------|------------|-------|------|
| 49  | 1.3920      | PG-ST-02-170-1 | 2mgChem80s | 2 977  | 33 844 | 8 652  | 0.00  | 85.35 | 6.242 | 11-11-2021 | 19:20 |      |

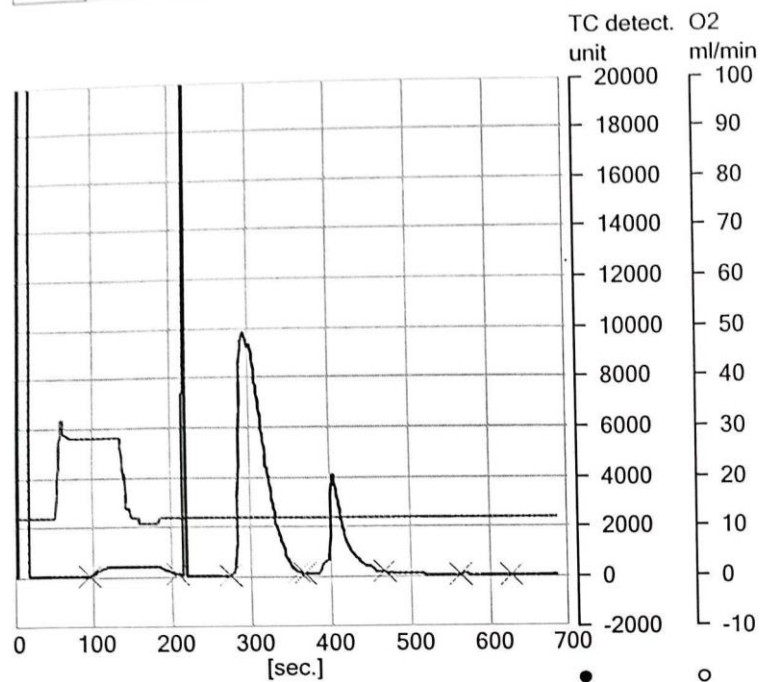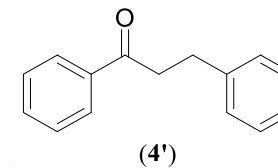

Figure S42. Elemental analysis data of (4').



PG-ST-02-172-04-01-1H

Current Data Parameters  
NAME PG-ST-02-172-04-01-1H  
EXPNO 10  
PROCNO 1

F2 - Acquisition Parameters  
Date\_ 20211028  
Time\_ 0.15 h  
INSTRUM Avance Neo 400  
PROBHD z163739\_0226 (  
PULPROG zg30  
TD 51724  
SOLVENT CDC13  
NS 18  
DS 0  
SWH 8620.689 Hz  
FIDRES 0.333334 Hz  
AQ 2.9999919 sec  
RG 15.718  
DW 58.000 usec  
DE 13.14 usec  
TE 298.1 K  
D1 1.00000000 sec  
TD0 1  
SFO1 400.1324708 MHz  
NUC1 1H  
P0 2.67 usec  
P1 8.00 usec  
PLW1 25.07999992 W

F2 - Processing parameters  
SI 65536  
SF 400.1300000 MHz  
WDW EM  
SSB 0  
LB 0.30 Hz  
GB 0  
PC 1.00

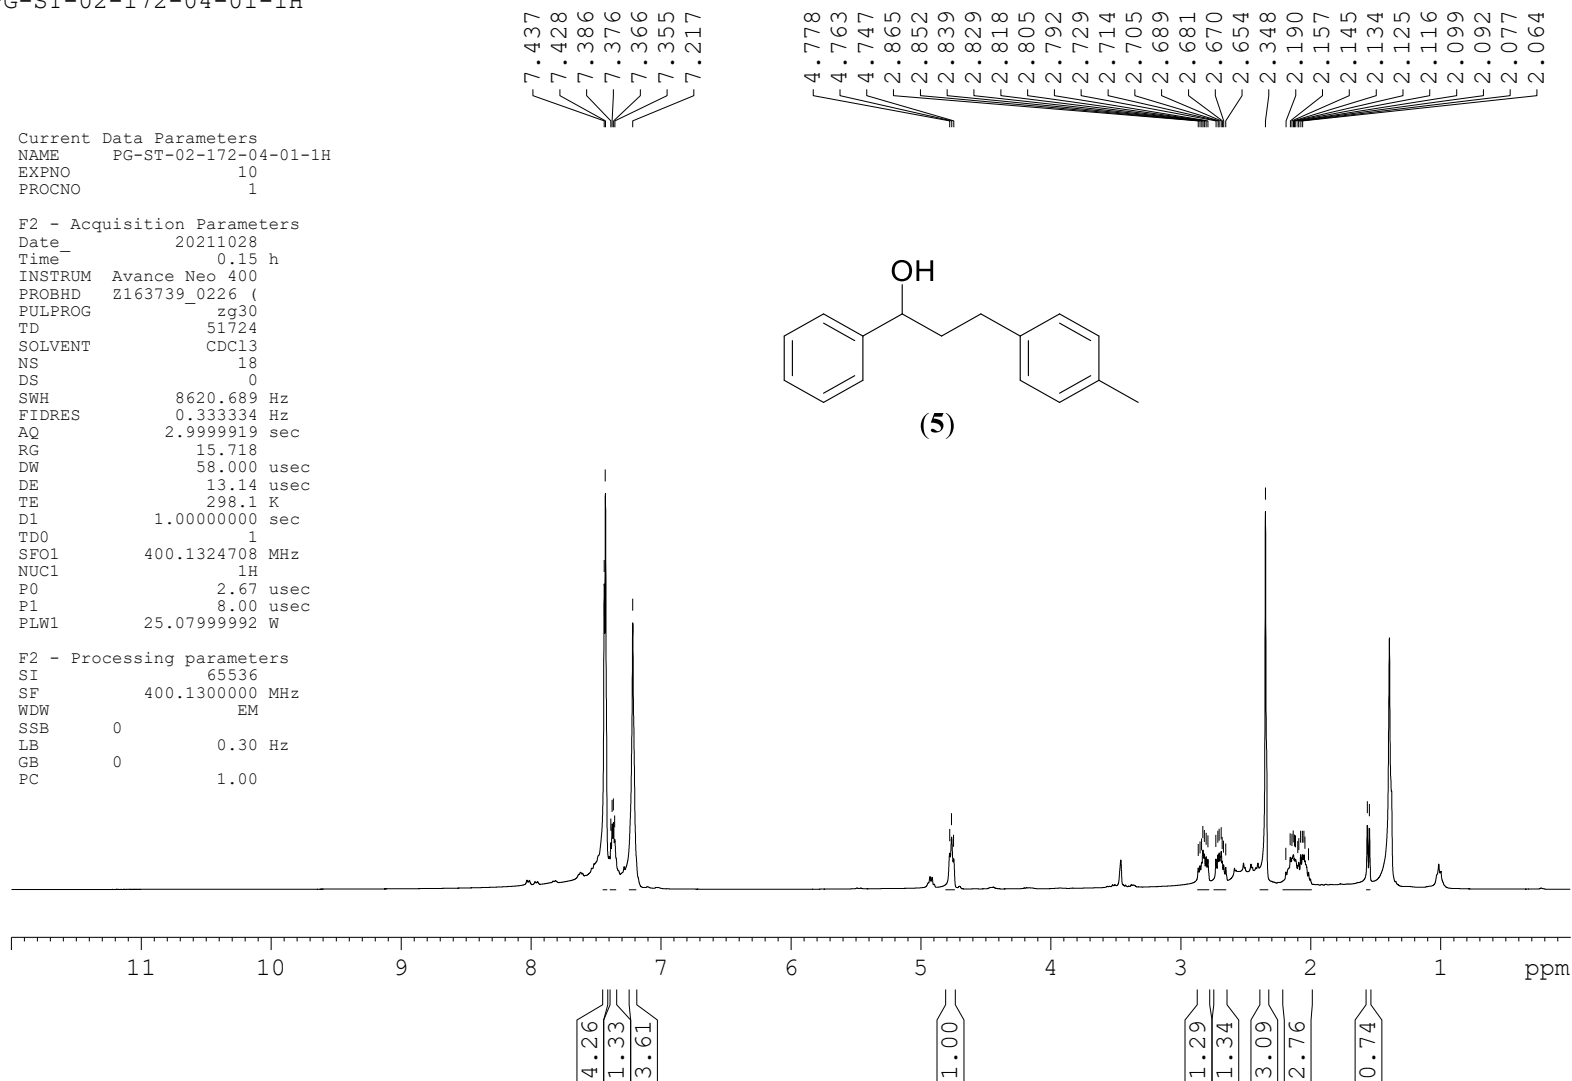

Figure S43. <sup>1</sup>H NMR spectrum of (5) in CDCl<sub>3</sub>.

PG-ST-02-172-04-01-1H

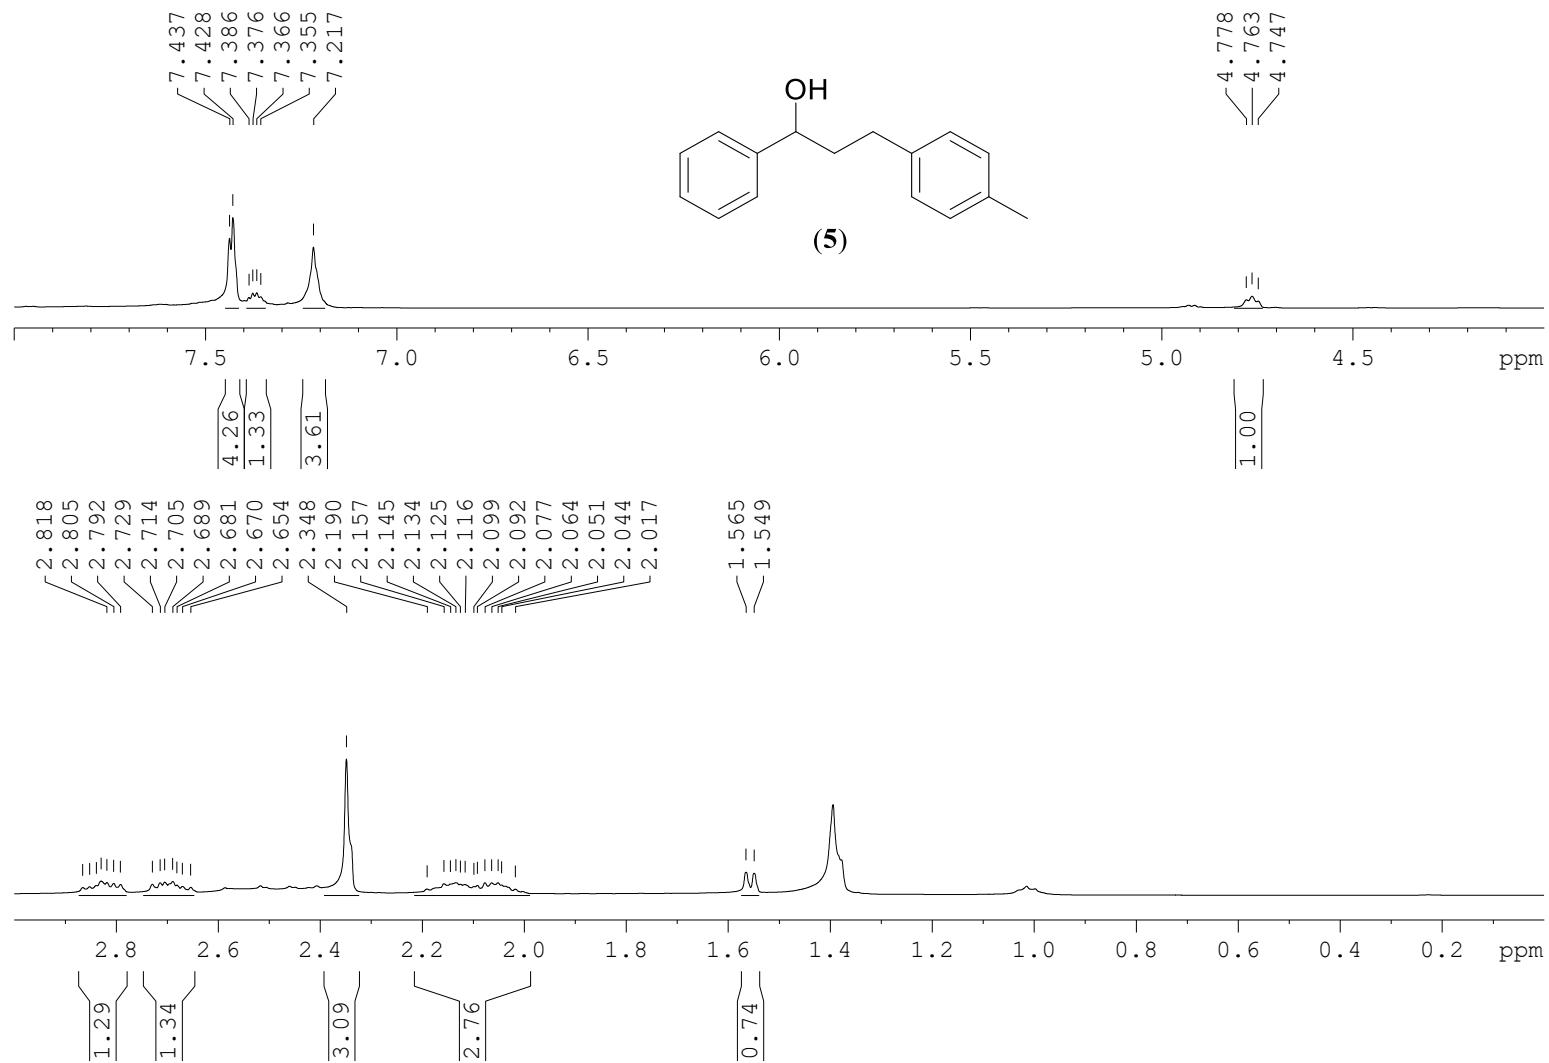

**Figure S44.** Expanded  $^1\text{H}$  NMR spectrum of (5) in  $\text{CDCl}_3$ .

PG-ST-02-172-04-01-13C

Current Data Parameters  
NAME PG-ST-02-172-04-01-13C  
EXPNO 12  
PROCNO 1

F2 - Acquisition Parameters  
Date\_ 20211028  
Time\_ 0.29 h  
INSTRUM Avance Neo 400  
PROBHD Z163739\_0226 (  
PULPROG zgpg30  
TD 65536  
SOLVENT CDCl3  
NS 365  
DS 2  
SWH 27777.777 Hz  
FIDRES 0.847710 Hz  
AQ 1.1796480 sec  
RG 101  
DW 18.000 usec  
DE 6.50 usec  
TE 299.1 K  
D1 1.00000000 sec  
D11 0.03000000 sec  
TD0 1  
SFO1 100.6242384 MHz  
NUC1 13C  
P0 2.67 usec  
P1 8.00 usec  
PLW1 99.33999634 W  
SFO2 400.1316005 MHz  
NUC2 1H  
CPDPRG[2] waltz65  
PCPD2 90.00 usec  
PLW2 25.07999992 W  
PLW12 0.19815999 W  
PLW13 0.09967500 W

F2 - Processing parameters  
SI 32768  
SF 100.6127685 MHz  
WDW EM  
SSB 0  
LB 1.00 Hz  
GB 0  
PC 1.40

144.72  
140.14  
136.03  
130.29  
128.84  
128.57  
127.68  
126.06

77.53  
77.21  
76.89  
74.19

39.31

29.83  
29.49

19.31

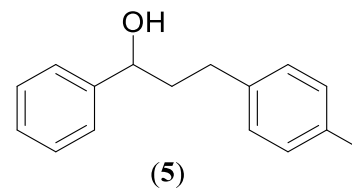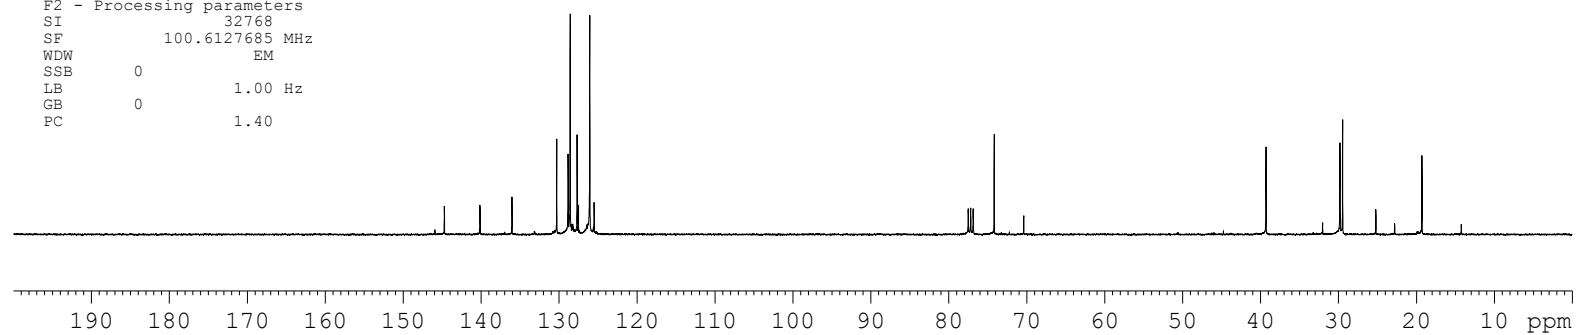

Figure S45.  $^{13}\text{C}\{^1\text{H}\}$  NMR spectrum of (5) in  $\text{CDCl}_3$ .

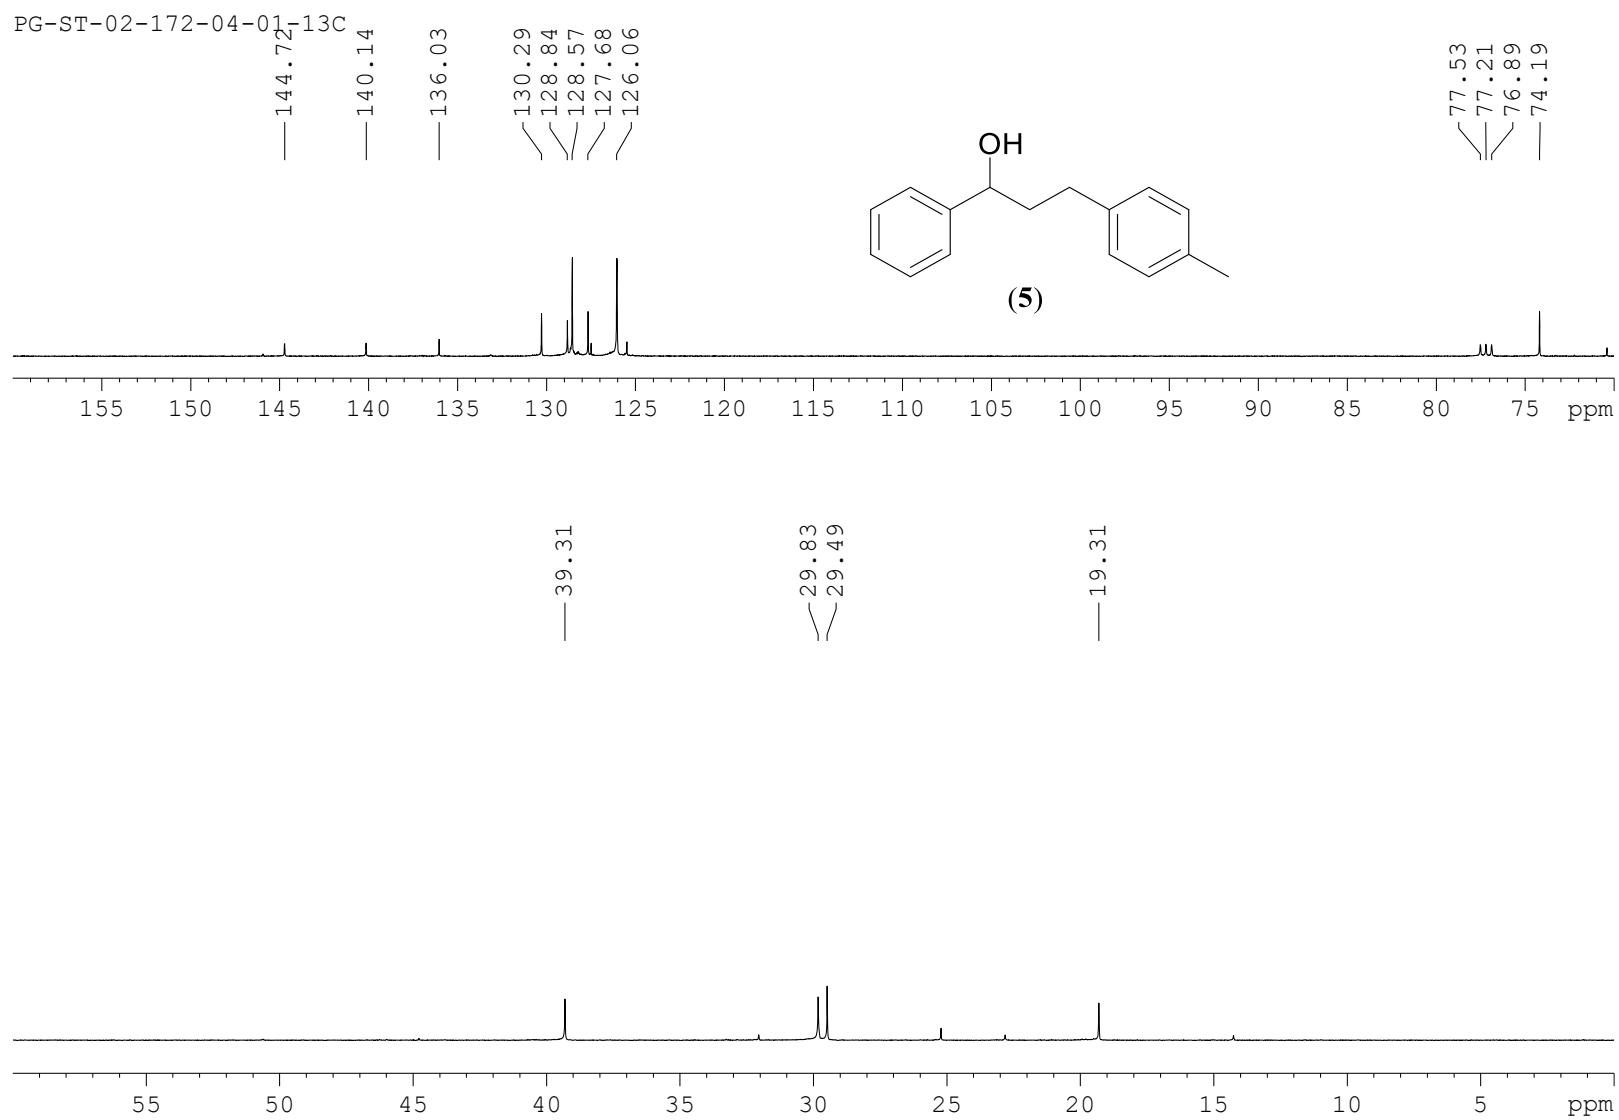

**Figure S46.** Expanded  $^{13}\text{C}\{^1\text{H}\}$  NMR spectrum of (5) in  $\text{CDCl}_3$ .

File : F:\GCMS-DATA-2021\OCT2021\PG-ST-02-172-04.D  
Operator : SRD  
Acquired : 28 Oct 2021 13:43 using AcqMethod COMMONMETHOD-2020.M  
Instrument : GCMS  
Sample Name: PG-ST-02-172-04  
Misc Info :  
Vial Number: 4

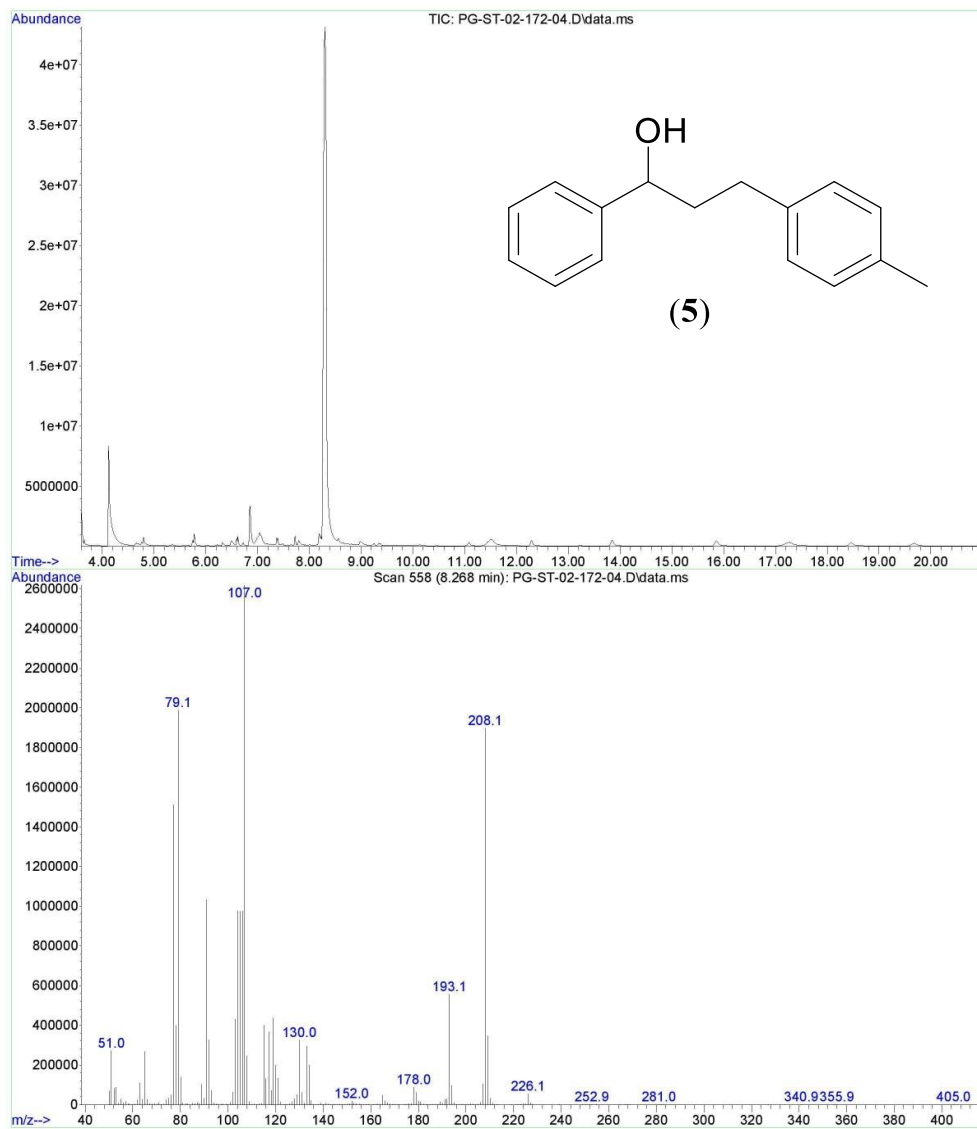

**Figure S47.** GCMS trace in EtOAc of (5) showing the  $M^+$  peak at  $m/z$  226.

Document: CHNS21012022 (varioMICRO) from: ---,-- (modified)

SP18022016  
varioMICRO CHNS  
serial number: 15154051

Graphic report

| No. | Weight [mg] | Name              | Method     | N Area | C Area | H Area | N [%] | C [%] | H [%] | Date       | Time  | Info |
|-----|-------------|-------------------|------------|--------|--------|--------|-------|-------|-------|------------|-------|------|
| 25  | 2.0410      | PG-ST-02-172-04-1 | 2mgChem80s | 2 871  | 48 492 | 16 101 | 0.00  | 84.70 | 8.277 | 21-01-2022 | 17:03 |      |

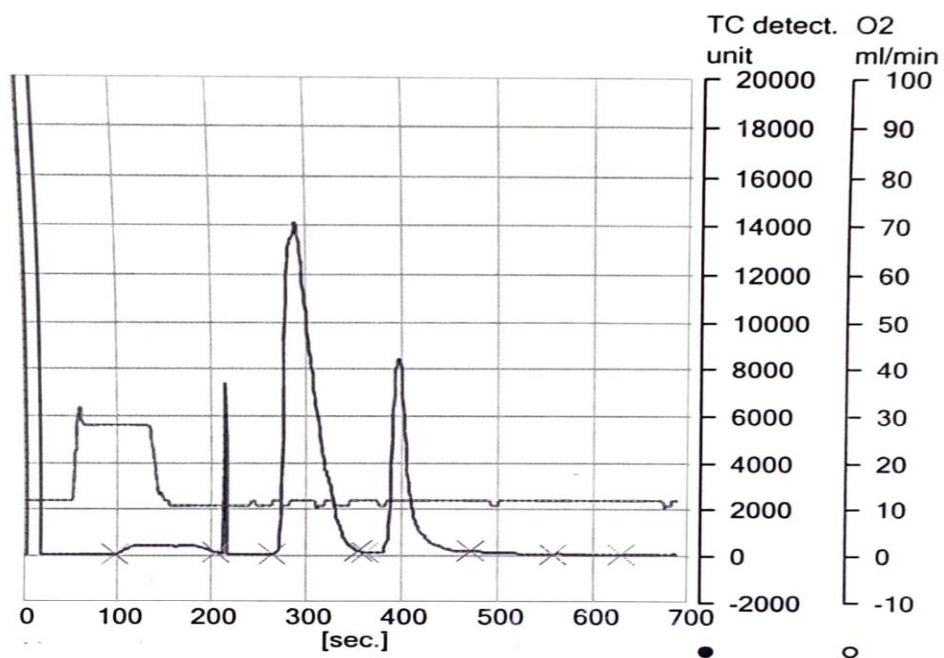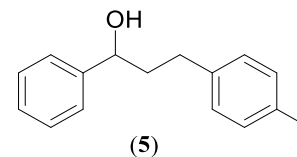

Figure S48. Elemental analysis data of (5).

PG-ST-02-173-03

```
Current Data Parameters
NAME      PG-ST-02-173-03
EXPNO     1
PROCNO    1

F2 - Acquisition Parameters
Date_     20211030
Time      8.04
INSTRUM   spect
PROBHD    5 mm PABBO BB-
PULPROG   zg30
TD         54274
SOLVENT   CDCl3
NS         17
DS         0
SWH       8223.685 Hz
FIDRES    0.151522 Hz
AQ        3.2998593 sec
RG         161
DW         60.800 usec
DE         6.50 usec
TE         297.3 K
D1         1.00000000 sec
TD0        1

===== CHANNEL f1 =====
NUC1       1H
P1         14.75 usec
PL1        -1.00 dB
PL1W       10.56200695 W
SFO1       400.1324710 MHz

F2 - Processing parameters
SI         32768
SF         400.1300095 MHz
WDW        EM
SSB        0
LB         0.30 Hz
GB         0
PC         1.00
```

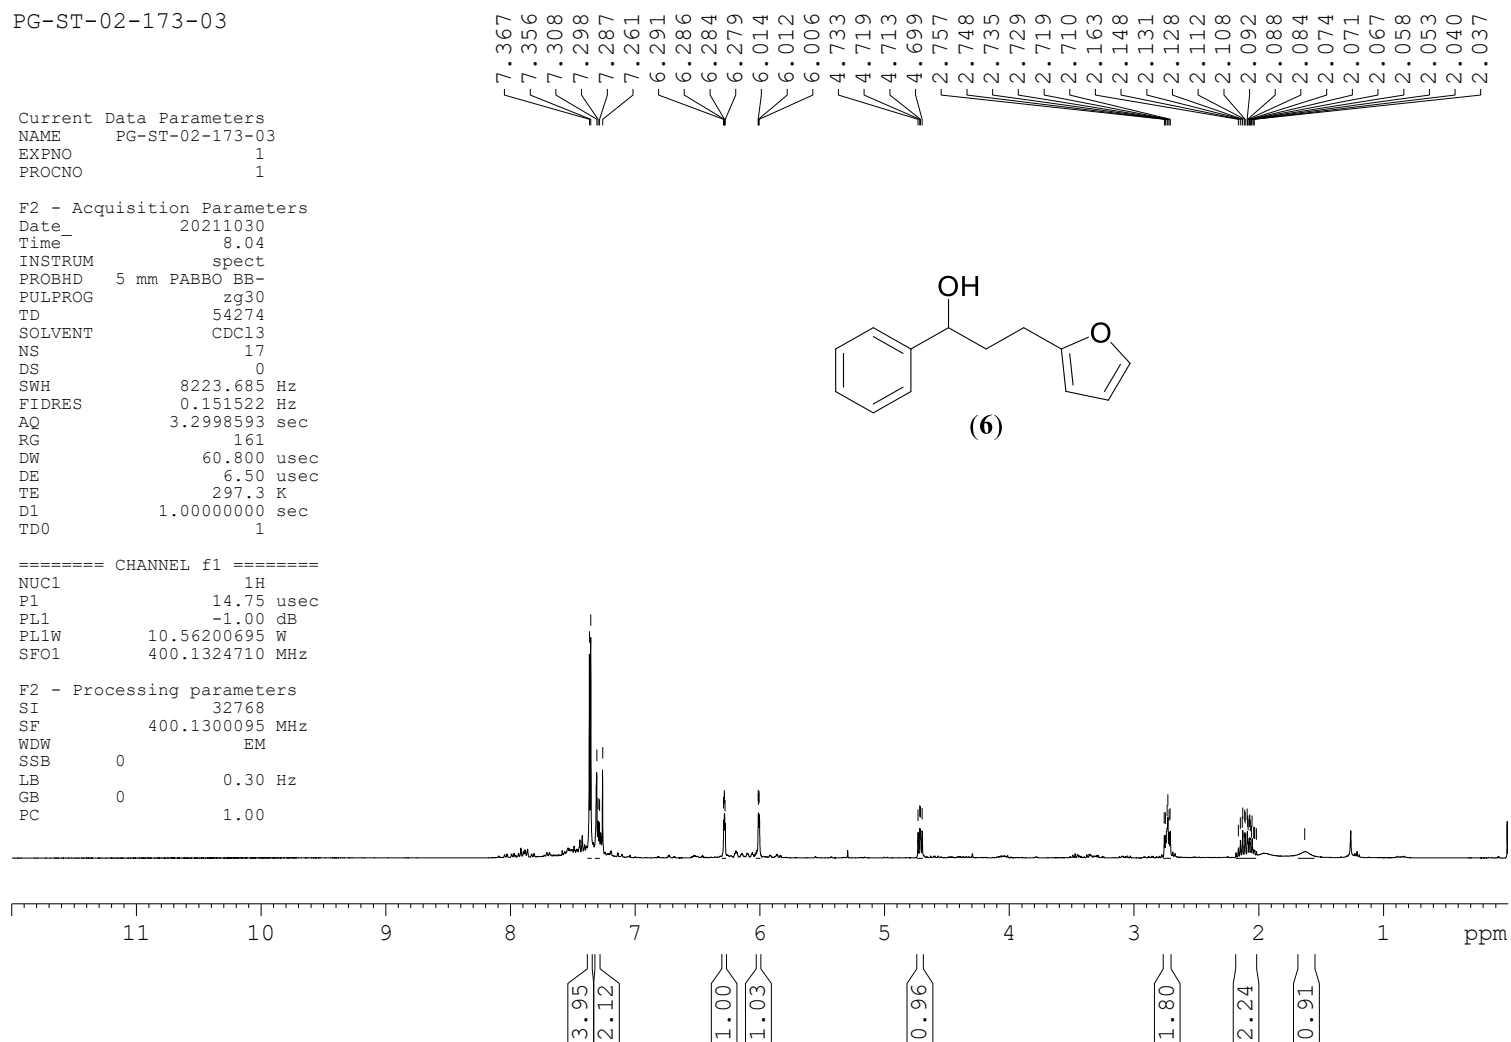

Figure S49. <sup>1</sup>H NMR spectrum of (6) in CDCl<sub>3</sub>.

PG-ST-02-173-03

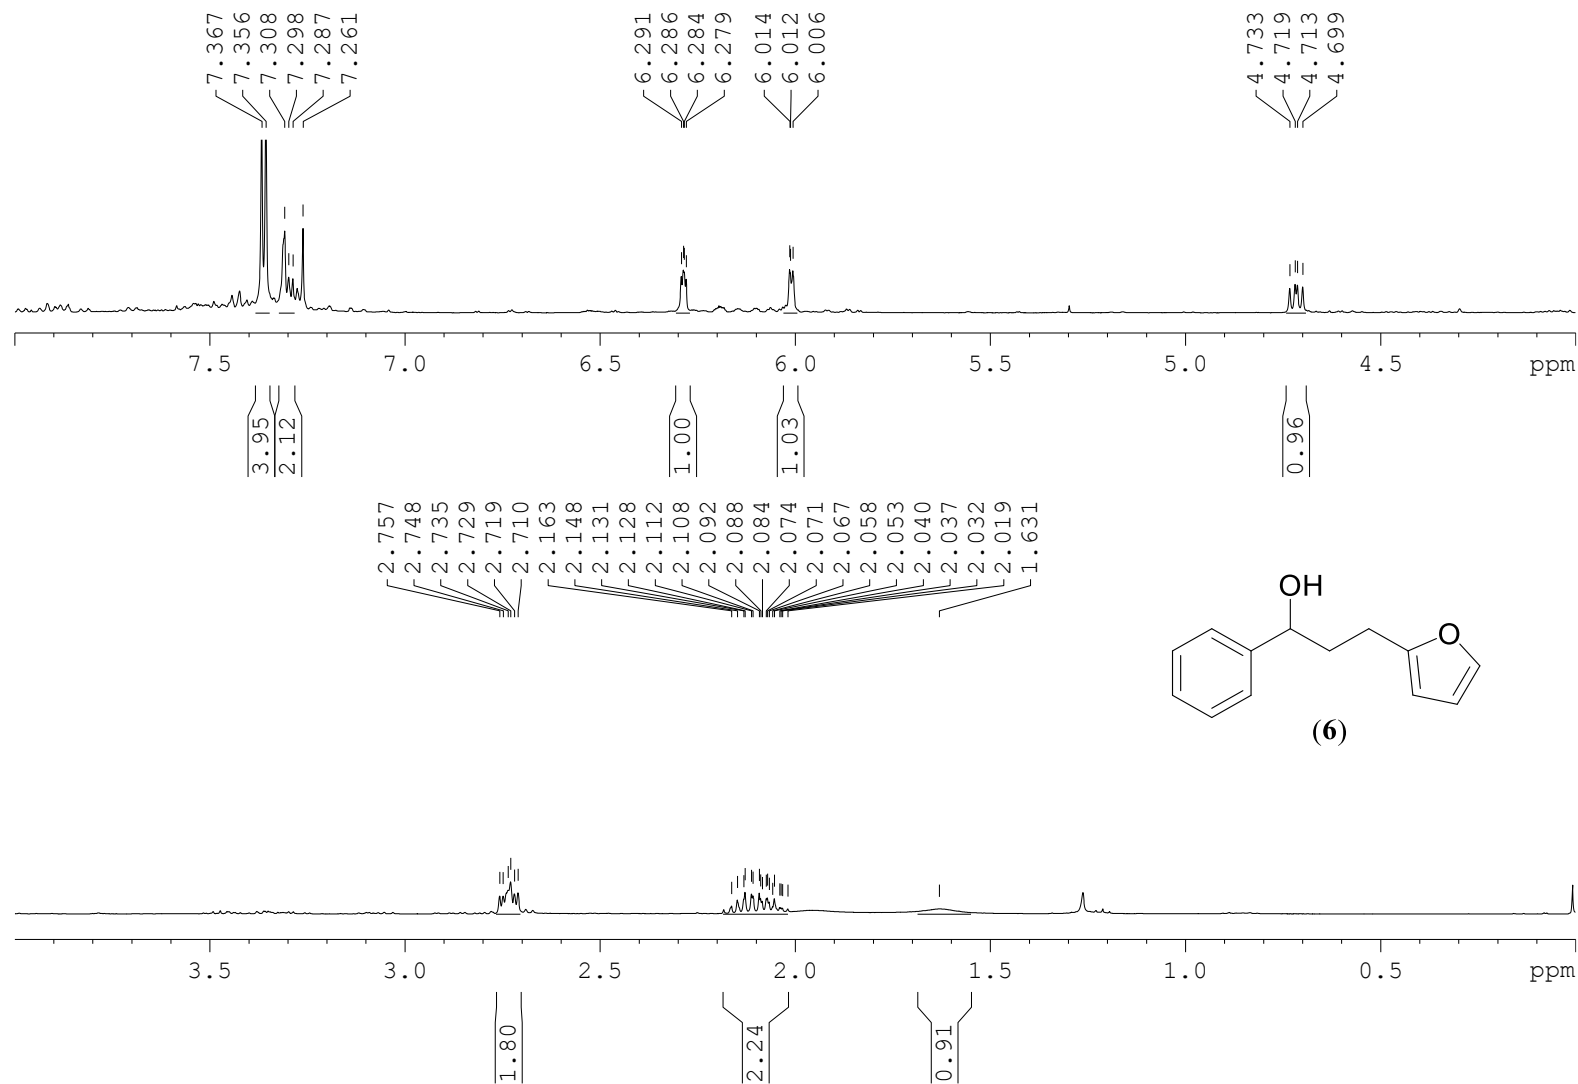

Figure S50. Expanded <sup>1</sup>H NMR spectrum of (6) in CDCl<sub>3</sub>.



PG-ST-02-173-03-13C-1

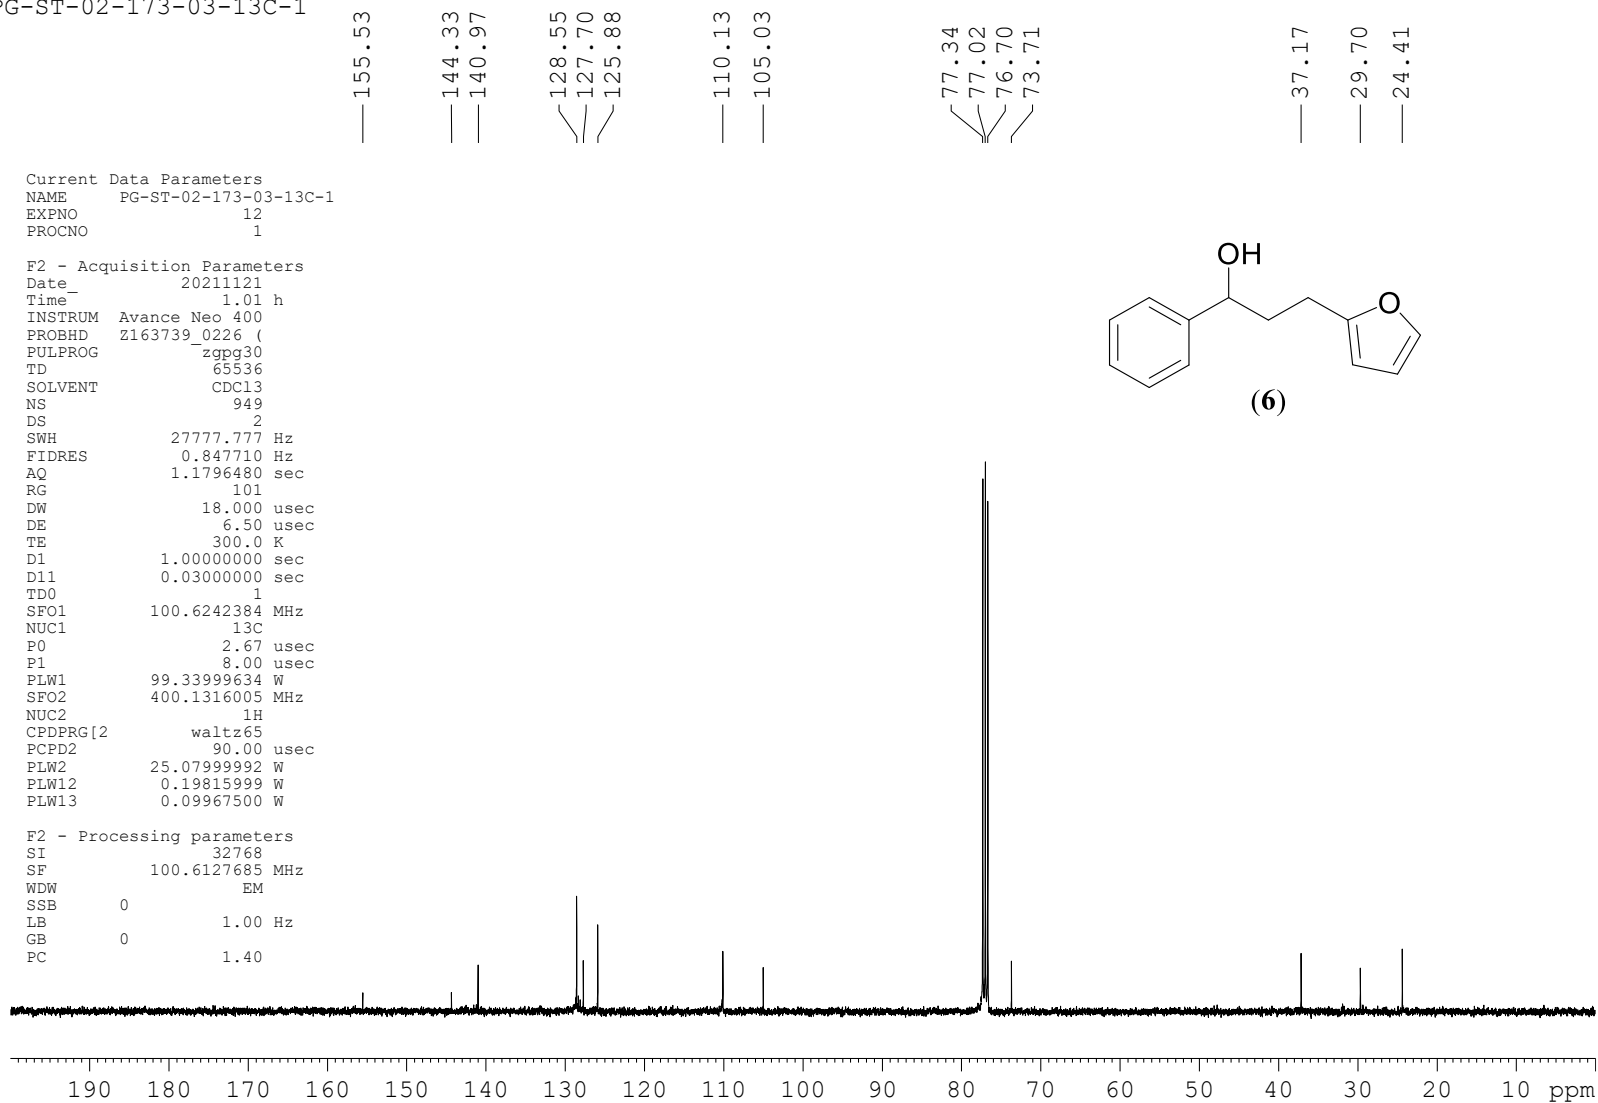

Figure S51.  $^{13}\text{C}\{^1\text{H}\}$  NMR spectrum of (6) in  $\text{CDCl}_3$ .

PG-ST-02-173-03-13C-1

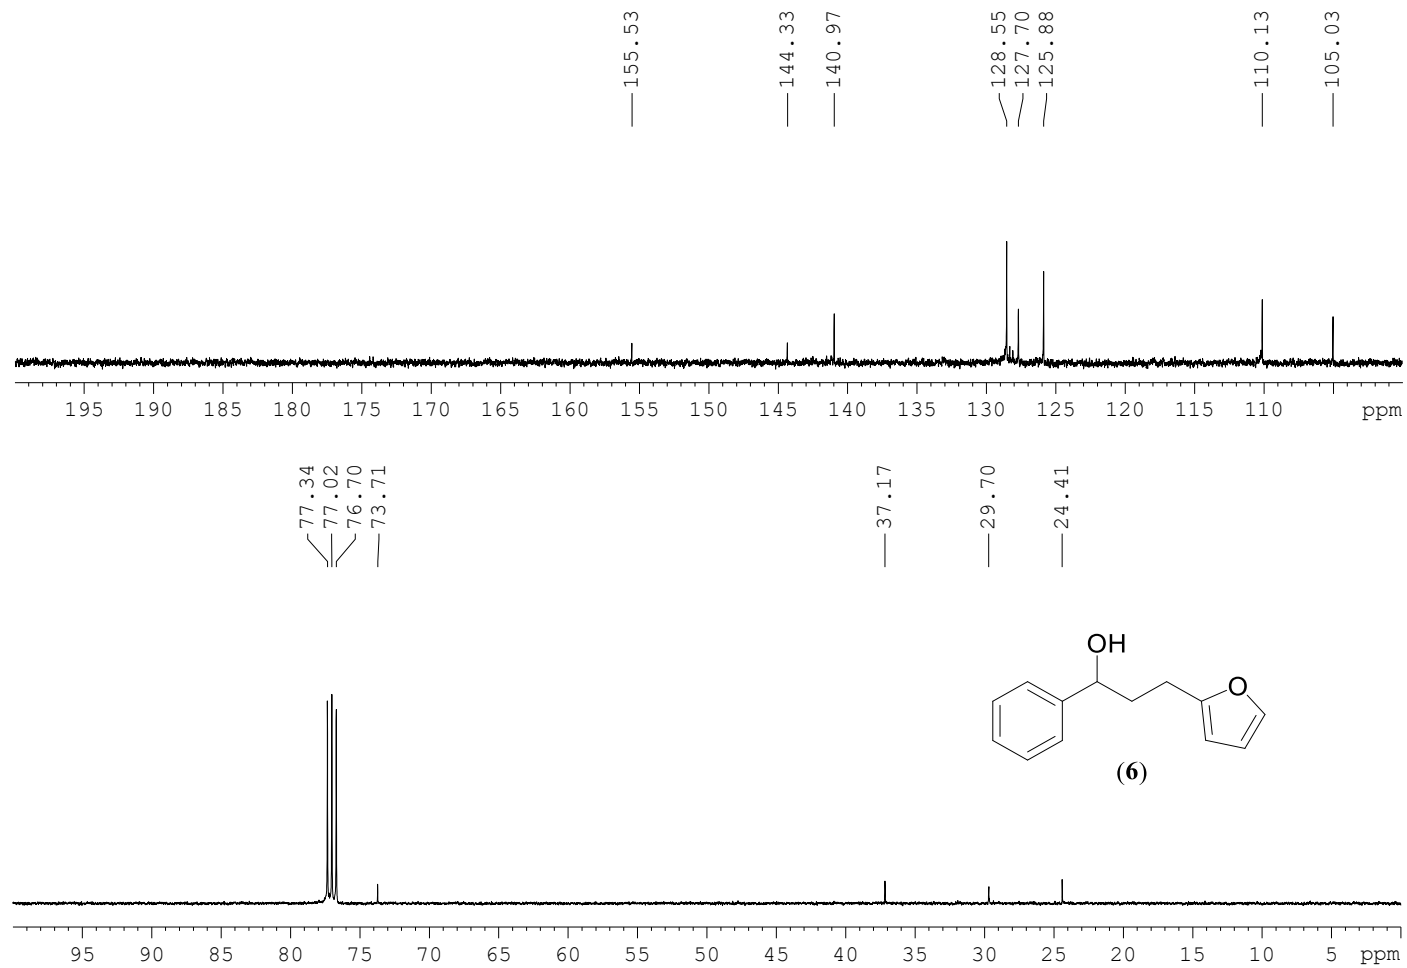

**Figure S52.** Expanded  $^{13}\text{C}\{^1\text{H}\}$  NMR spectrum of (6) in  $\text{CDCl}_3$ .

File : F:\GCMS-DATA-2021\NOV2021\PG-ST-02-173-03-1.D  
Operator : RM  
Acquired : 11 Nov 2021 16:13 using AcqMethod COMMONMETHOD-2010.M  
Instrument : GCMS  
Sample Name : PG-ST-02-173-03-1  
Misc Info :  
Vial Number: 5

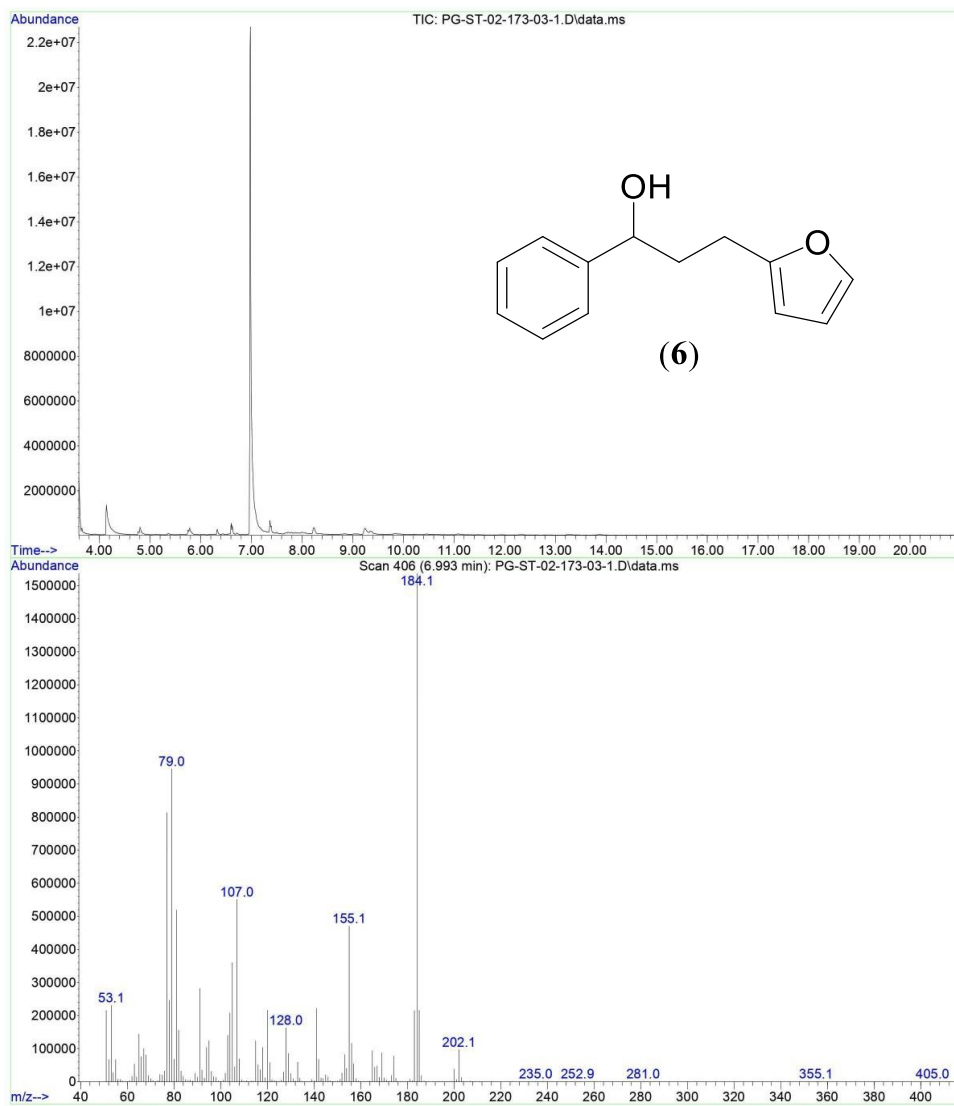

**Figure S53.** GCMS trace in EtOAc of (6) showing the  $M^+$  peak at  $m/z$  202.

| No. | Weight [mg] | Name            | Method     | N Area | C Area | H Area | N [%] | C [%] | H [%] | Date       | Time  | Info |
|-----|-------------|-----------------|------------|--------|--------|--------|-------|-------|-------|------------|-------|------|
| 71  | 0.7950      | PG-ST-02-173-01 | 2mgChem80s | 2 953  | 17 258 | 5 298  | 0.00  | 78.14 | 5.898 | 16-11-2021 | 23:31 |      |

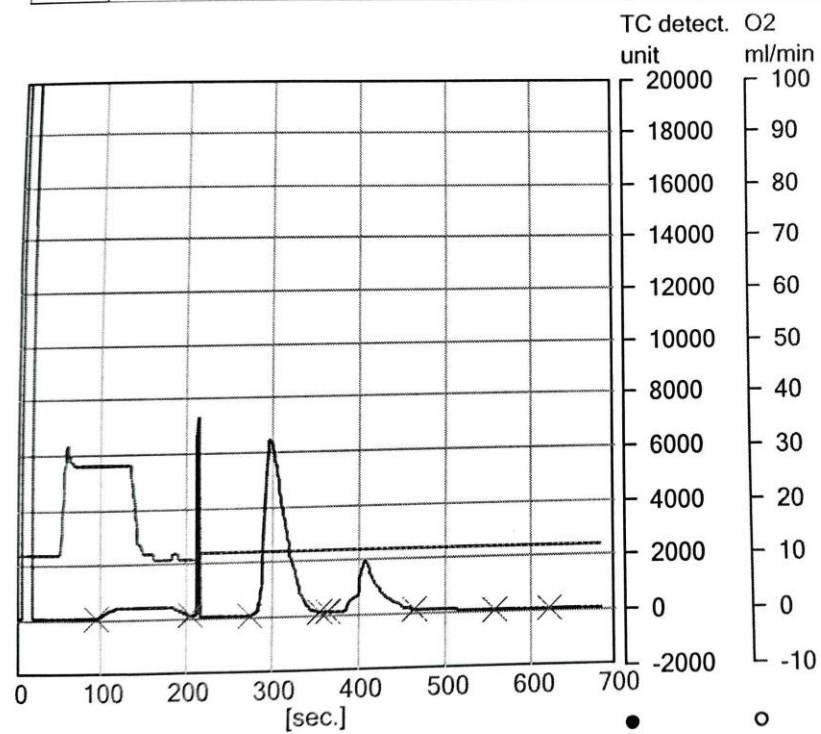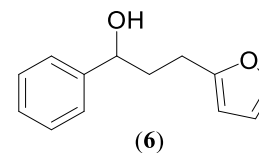

Scanned by TapScanner

Name: eassuperuser, Access: VarioMICRO administrator

17-11-2021 15:07

Figure S54. Elemental analysis data of (6).

PG-ST-02-174-02-1H

Current Data Parameters  
NAME PG-ST-02-174-02-1H  
EXPNO 1  
PROCNO 1

F2 - Acquisition Parameters  
Date\_ 20211031  
Time 23.53 h  
INSTRUM Avance  
PROBHD Z163739\_0237 (   
PULPROG zg30  
TD 51724  
SOLVENT CDCl3  
NS 18  
DS 0  
SWH 8620.689 Hz  
FIDRES 0.333334 Hz  
AQ 2.9999919 sec  
RG 101  
DW 58.000 usec  
DE 13.14 usec  
TE 300.8 K  
D1 1.00000000 sec  
TD0 1  
SFO1 400.3024719 MHz  
NUC1 1H  
P0 2.67 usec  
P1 8.00 usec  
PLW1 21.61000061 W

F2 - Processing parameters  
SI 65536  
SF 400.3000000 MHz  
WDW EM  
SSB 0  
LB 0.30 Hz  
GB 0  
PC 1.00

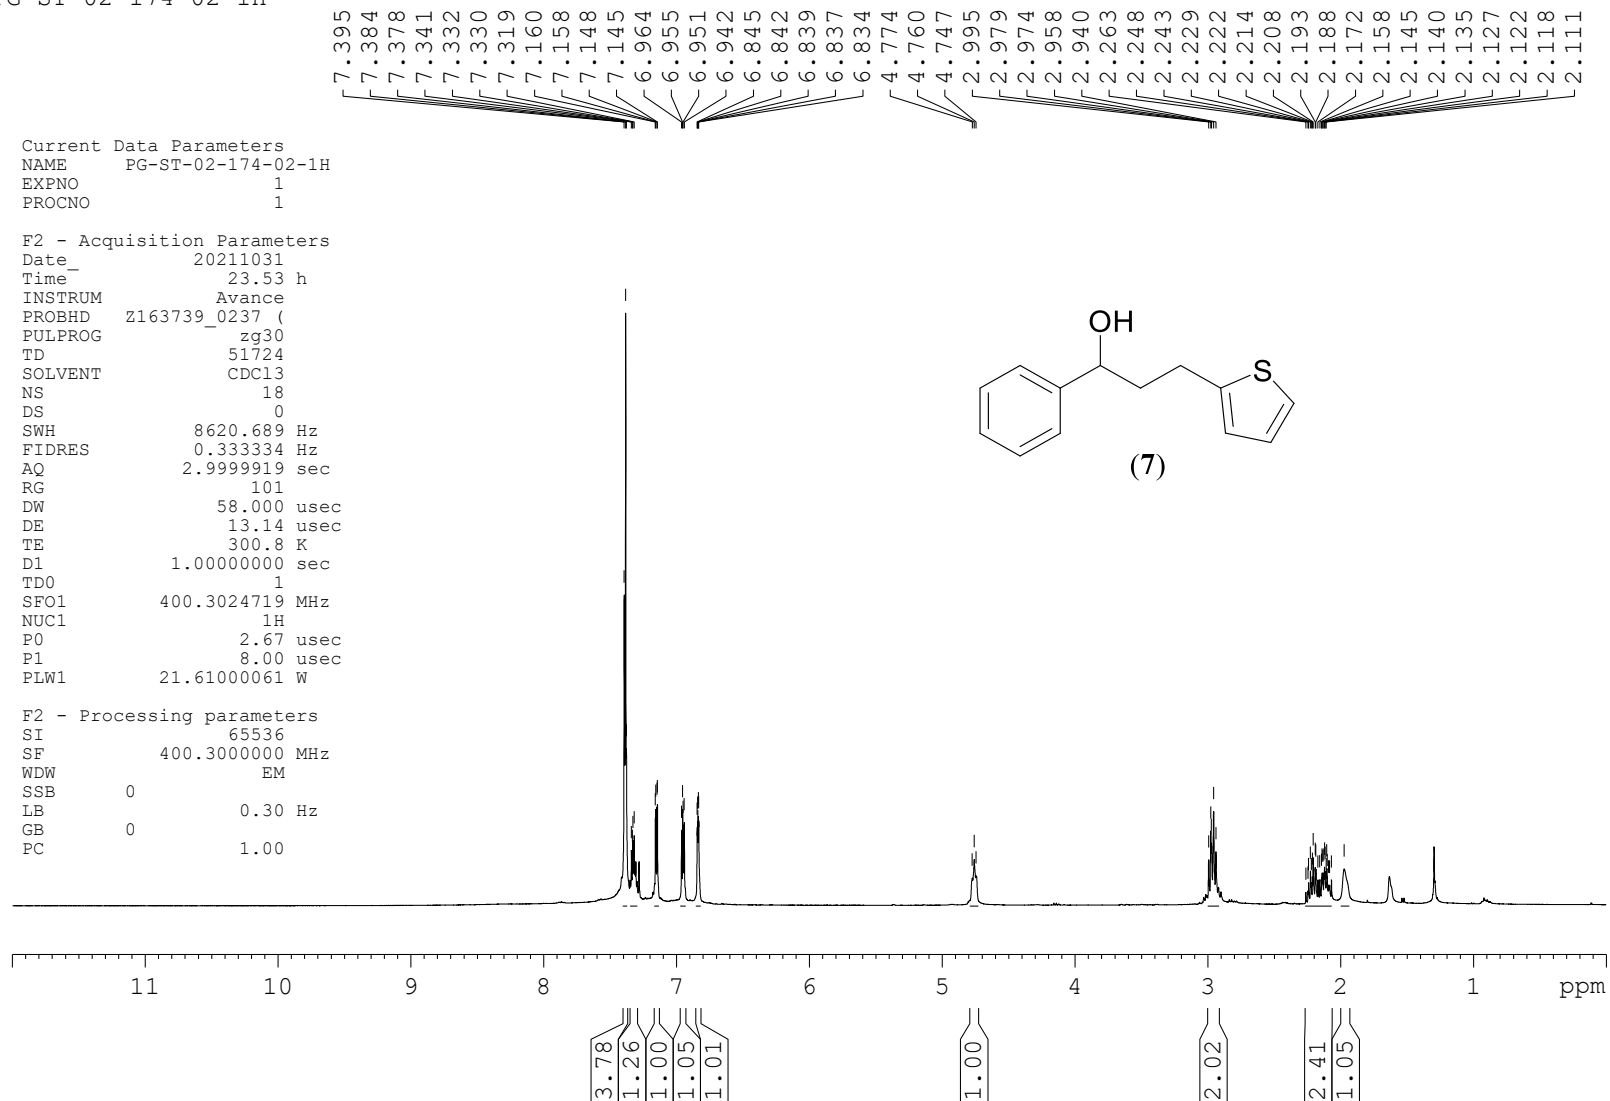

Figure S55. <sup>1</sup>H NMR spectrum of (7) in CDCl<sub>3</sub>.

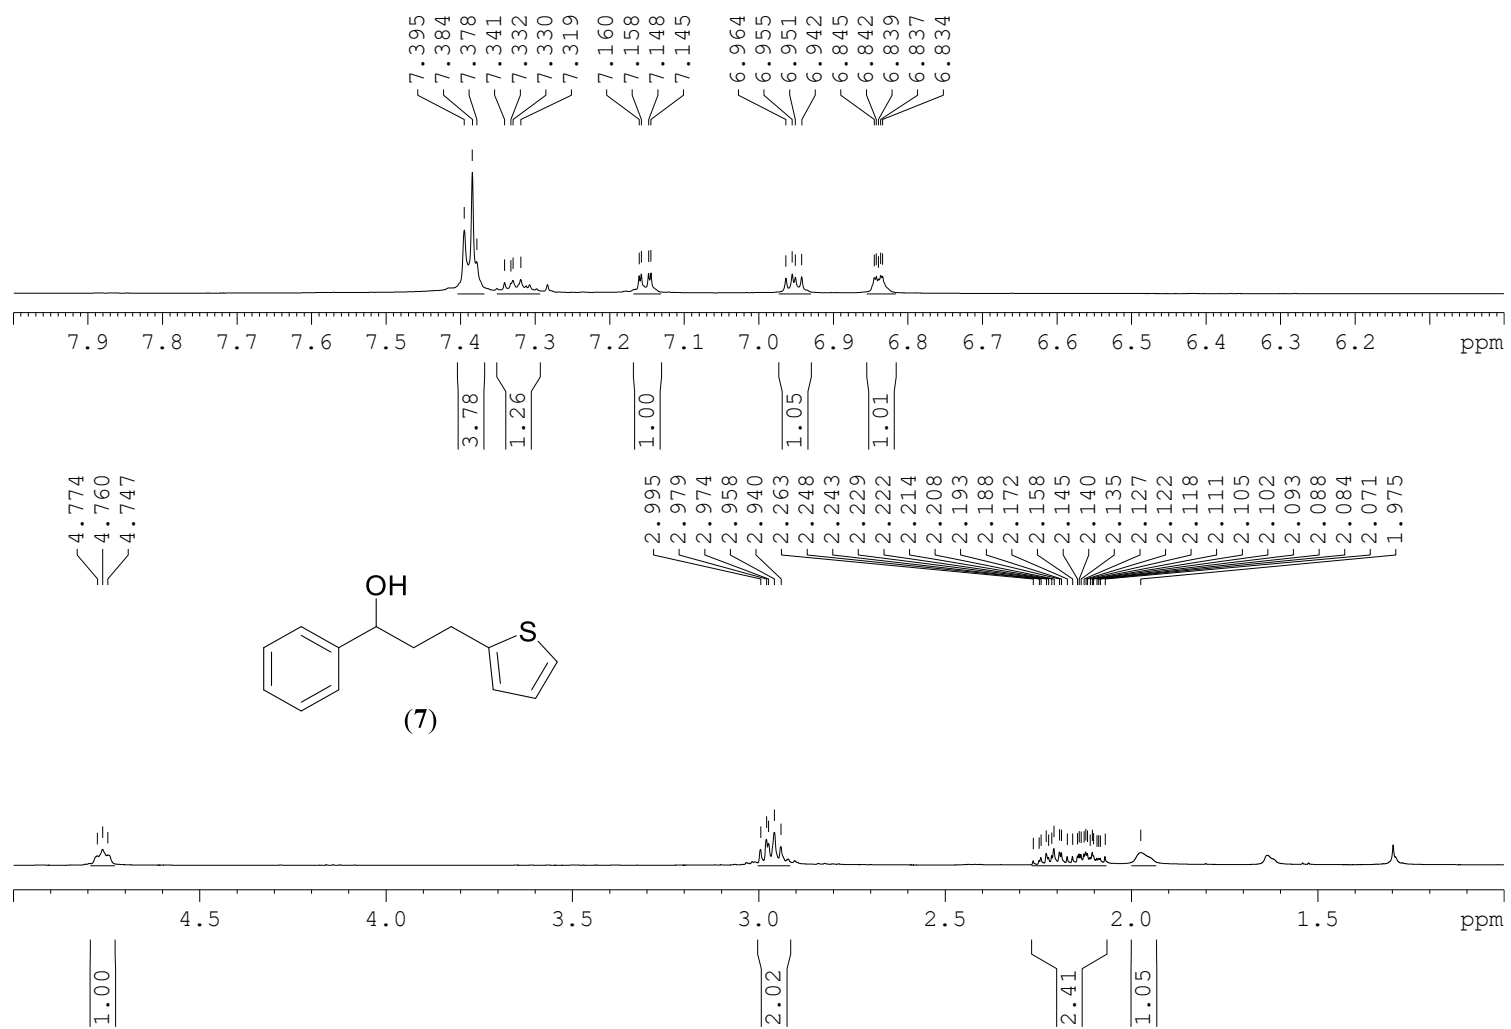

**Figure S56.** Expanded <sup>1</sup>H NMR spectrum of (7) in CDCl<sub>3</sub>.

PG-ST-02-174-02-13C

Current Data Parameters  
NAME PG-ST-02-174-02-13C  
EXPNO 1  
PROCNO 1

F2 - Acquisition Parameters  
Date\_ 20211101  
Time\_ 0.38 h  
INSTRUM Avance  
PROBHD z163739\_0237 (   
PULPROG zgpg30  
TD 65536  
SOLVENT CDCl3  
NS 1024  
DS 0  
SWH 27777.777 Hz  
FIDRES 0.847710 Hz  
AQ 1.1796480 sec  
RG 89.164  
DW 18.000 usec  
DE 6.50 usec  
TE 300.8 K  
D1 1.00000000 sec  
D11 0.03000000 sec  
TD0 1  
SFO1 100.6669898 MHz  
NUC1 13C  
P0 2.67 usec  
P1 8.00 usec  
PLW1 98.44999695 W  
SFO2 400.3016012 MHz  
NUC2 1H  
CPDPRG[2] waltz65  
PCPD2 90.00 usec  
PLW2 21.61000061 W  
PLW12 0.17075001 W  
PLW13 0.08588400 W

F2 - Processing parameters  
SI 32768  
SF 100.6555151 MHz  
WDW EM  
SSB 0  
LB 1.00 Hz  
GB 0  
PC 1.40

144.63  
144.36  
128.58  
127.74  
126.59  
125.91  
124.87  
123.27

77.36  
77.05  
76.73  
73.54

40.66

26.24

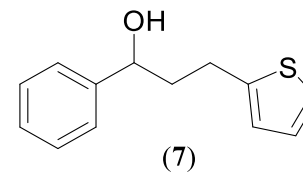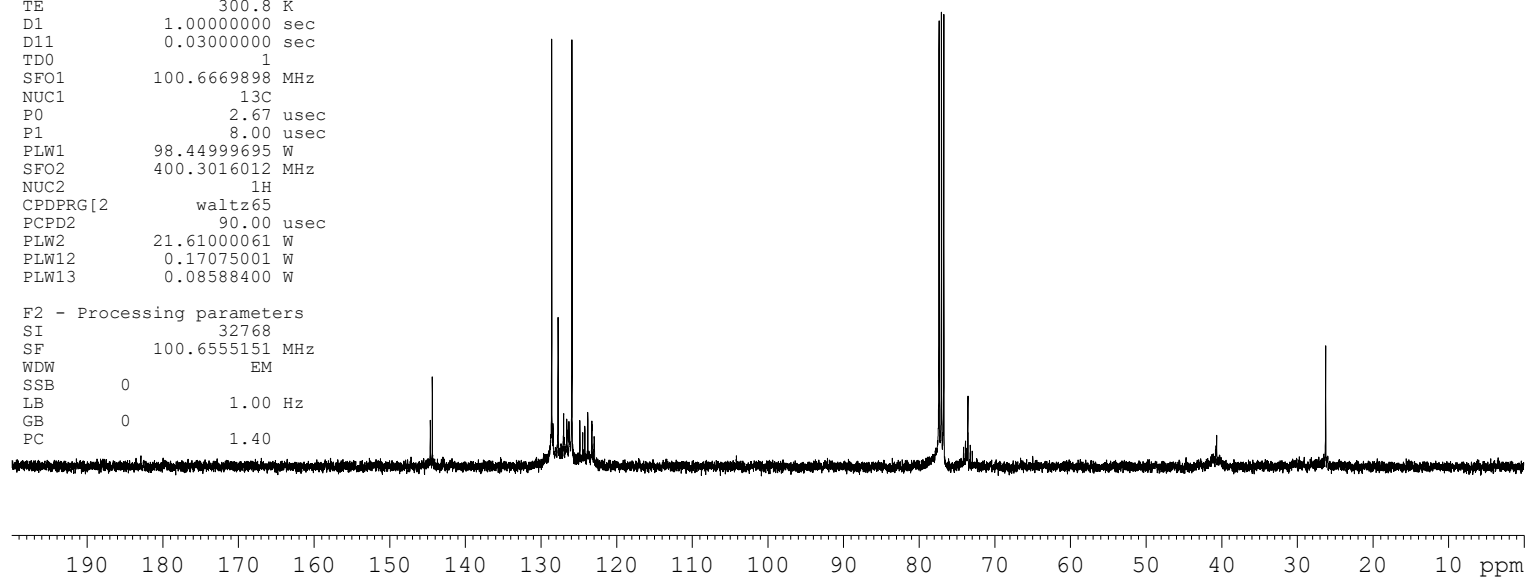

Figure S57.  $^{13}\text{C}\{^1\text{H}\}$  NMR spectrum of (7) in  $\text{CDCl}_3$ .

PG-ST-02-174-02-13C

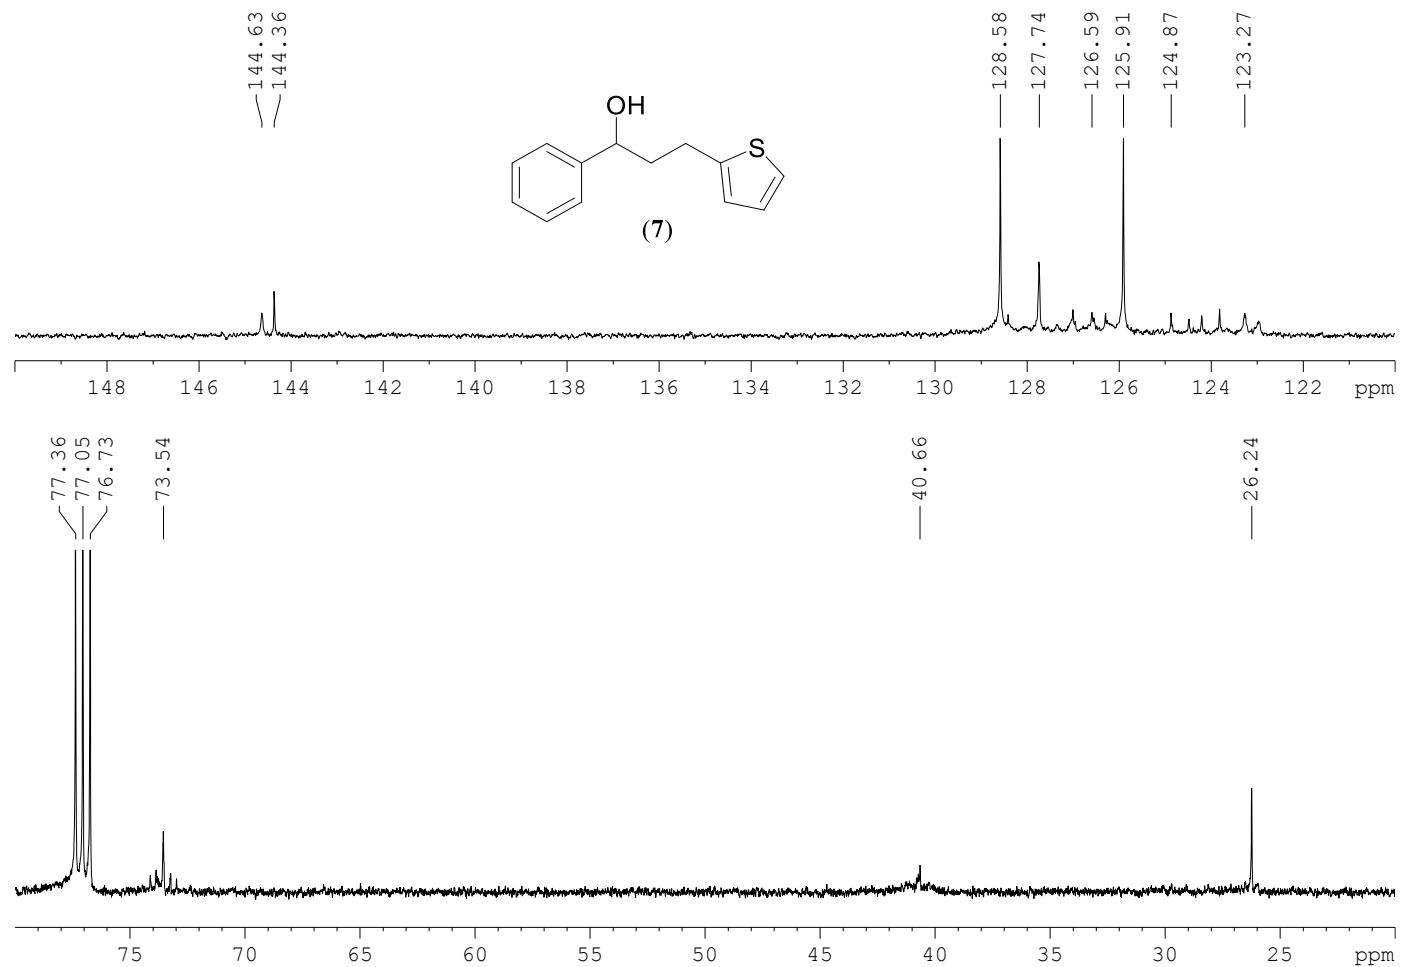

**Figure S58.**  $^{13}\text{C}\{^1\text{H}\}$  NMR spectrum of (7) in  $\text{CDCl}_3$ .



File : F:\GCMS-DATA-2021\OCT2021\PG-ST-02-174-02.D  
Operator : MK  
Acquired : 1 Nov 2021 16:39 using AcqMethod COMMONMETHOD-2020.M  
Instrument : GCMS  
Sample Name: PG-ST-02-174-02  
Misc Info :  
Vial Number: 2

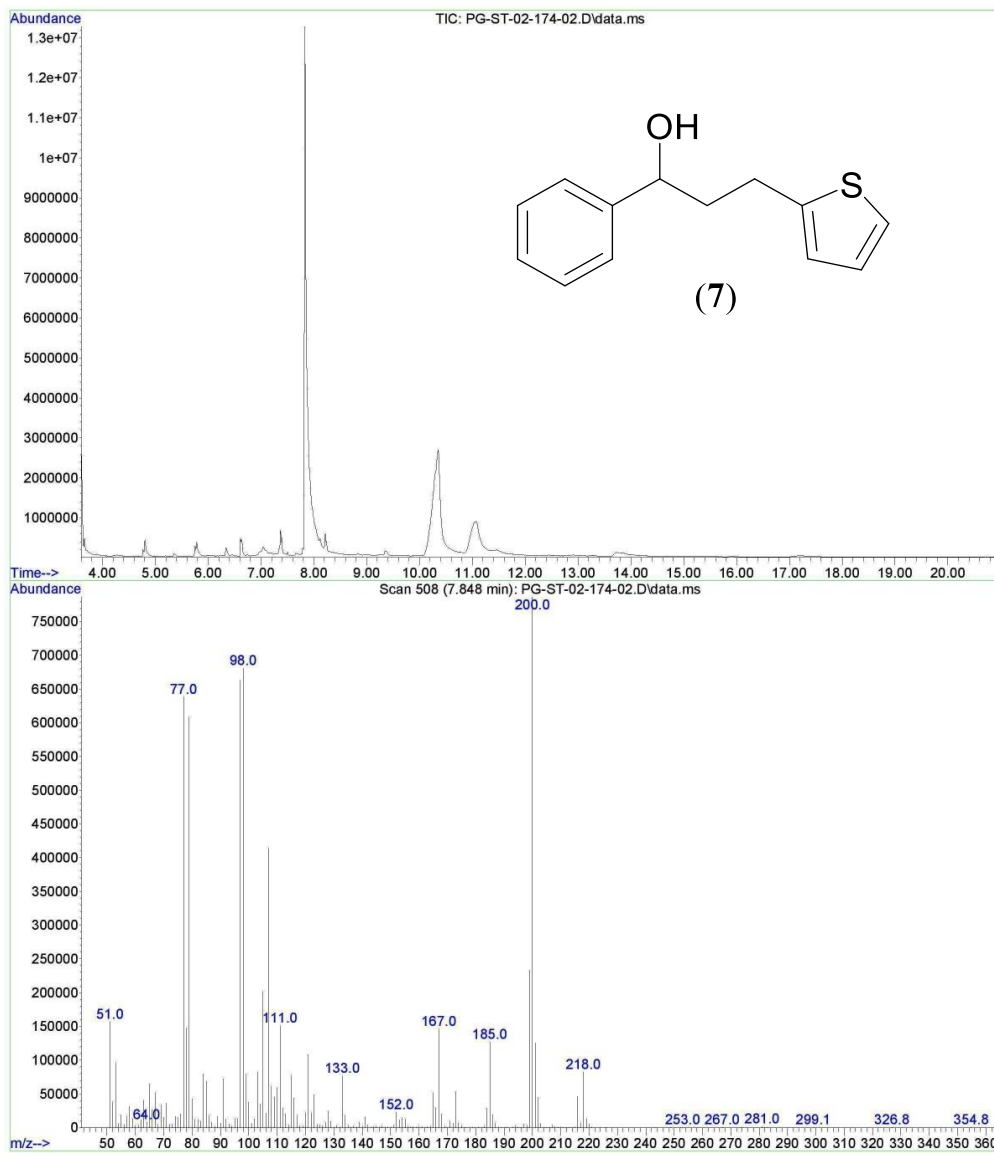

**Figure S59.** GCMS trace in EtOAc of (7) showing the M<sup>+</sup> peak at *m/z* 218.

Document: CHNS21012022 (varioMICRO) from: ---,--- (modified)

SP18022016  
varioMICRO CHNS  
serial number: 15154051

Graphic report

| No. | Weight [mg] | Name              | Method     | N Area | C Area | H Area | S Area | N [%] | C [%] | H [%] | S [%]  | Date       | Time  | Info |
|-----|-------------|-------------------|------------|--------|--------|--------|--------|-------|-------|-------|--------|------------|-------|------|
| 20  | 0.5980      | PG-ST-02-174-02-1 | 2mgChem80s | 2 902  | 12 091 | 4 773  | 1 024  | 0.00  | 72.42 | 6.189 | 14.302 | 21-01-2022 | 16:04 |      |

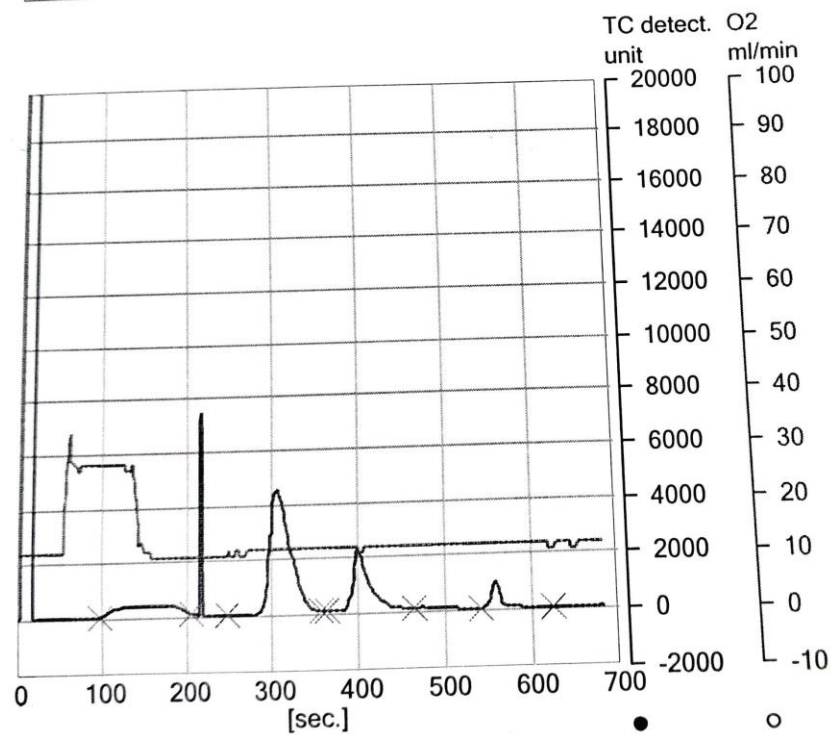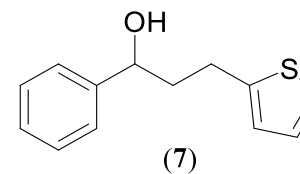

Figure S60. Elemental analysis data of (7).

PG-ST-02-176-04-1H

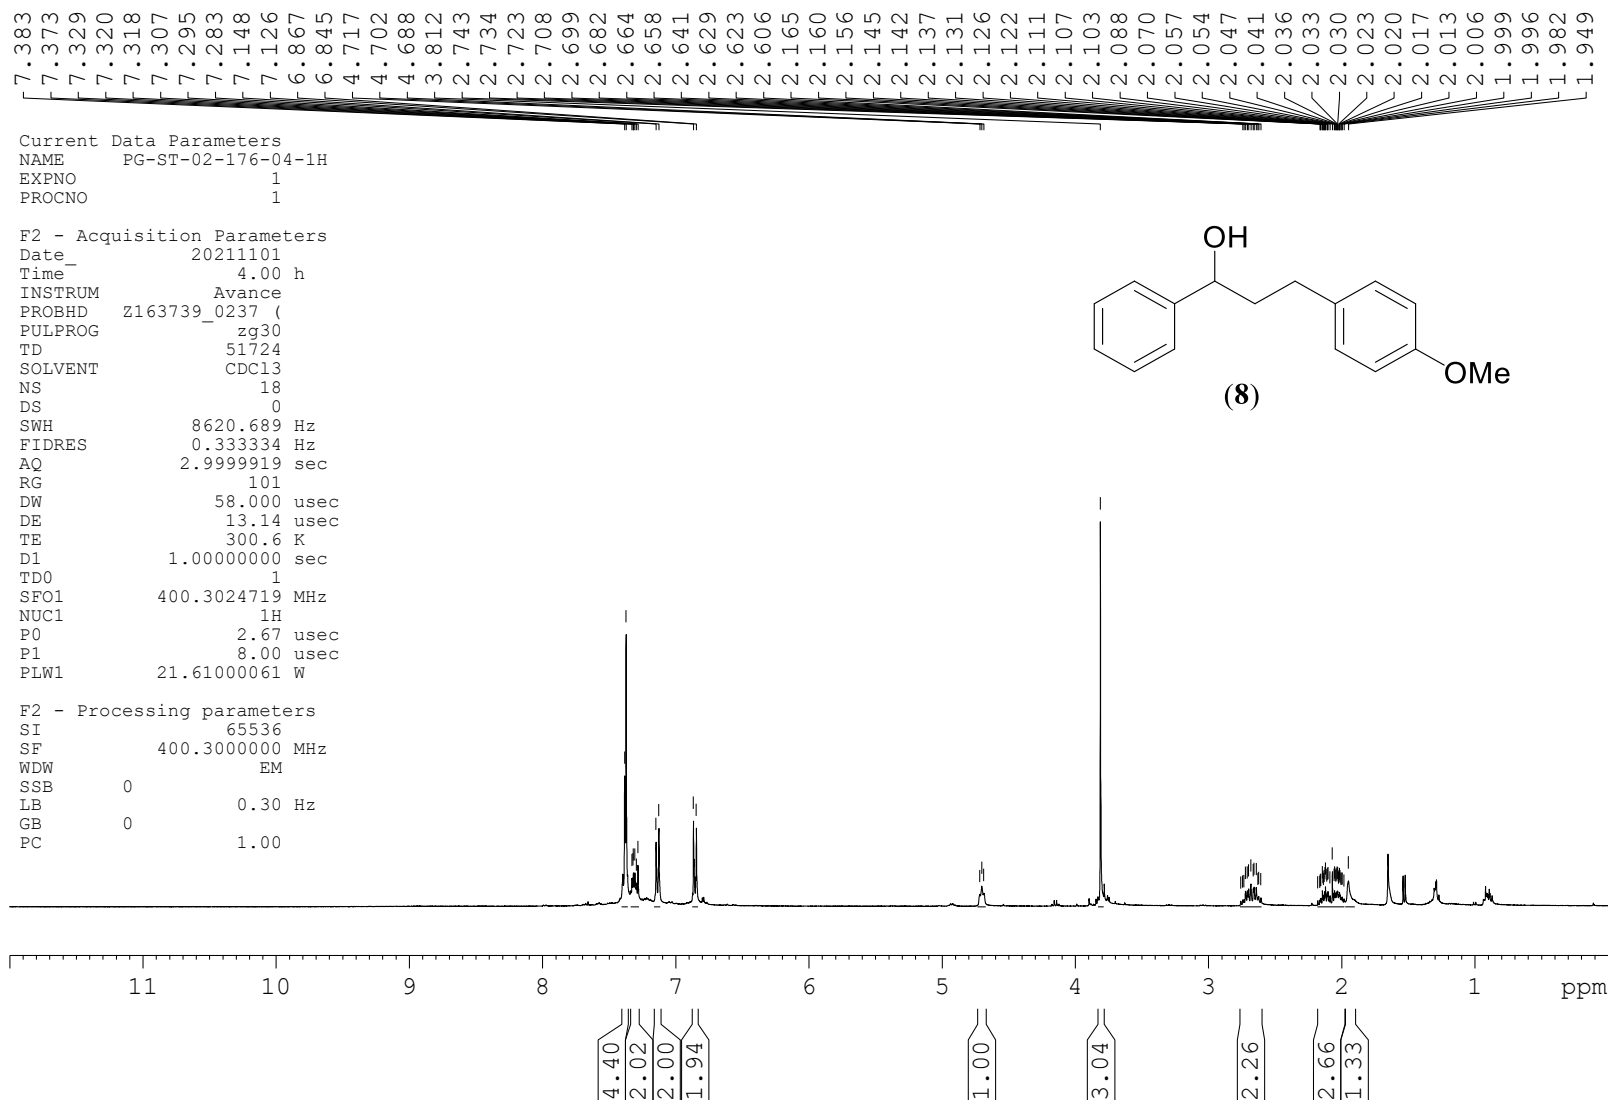

Figure S61.  $^1\text{H}$  NMR spectrum of (8) in  $\text{CDCl}_3$ .

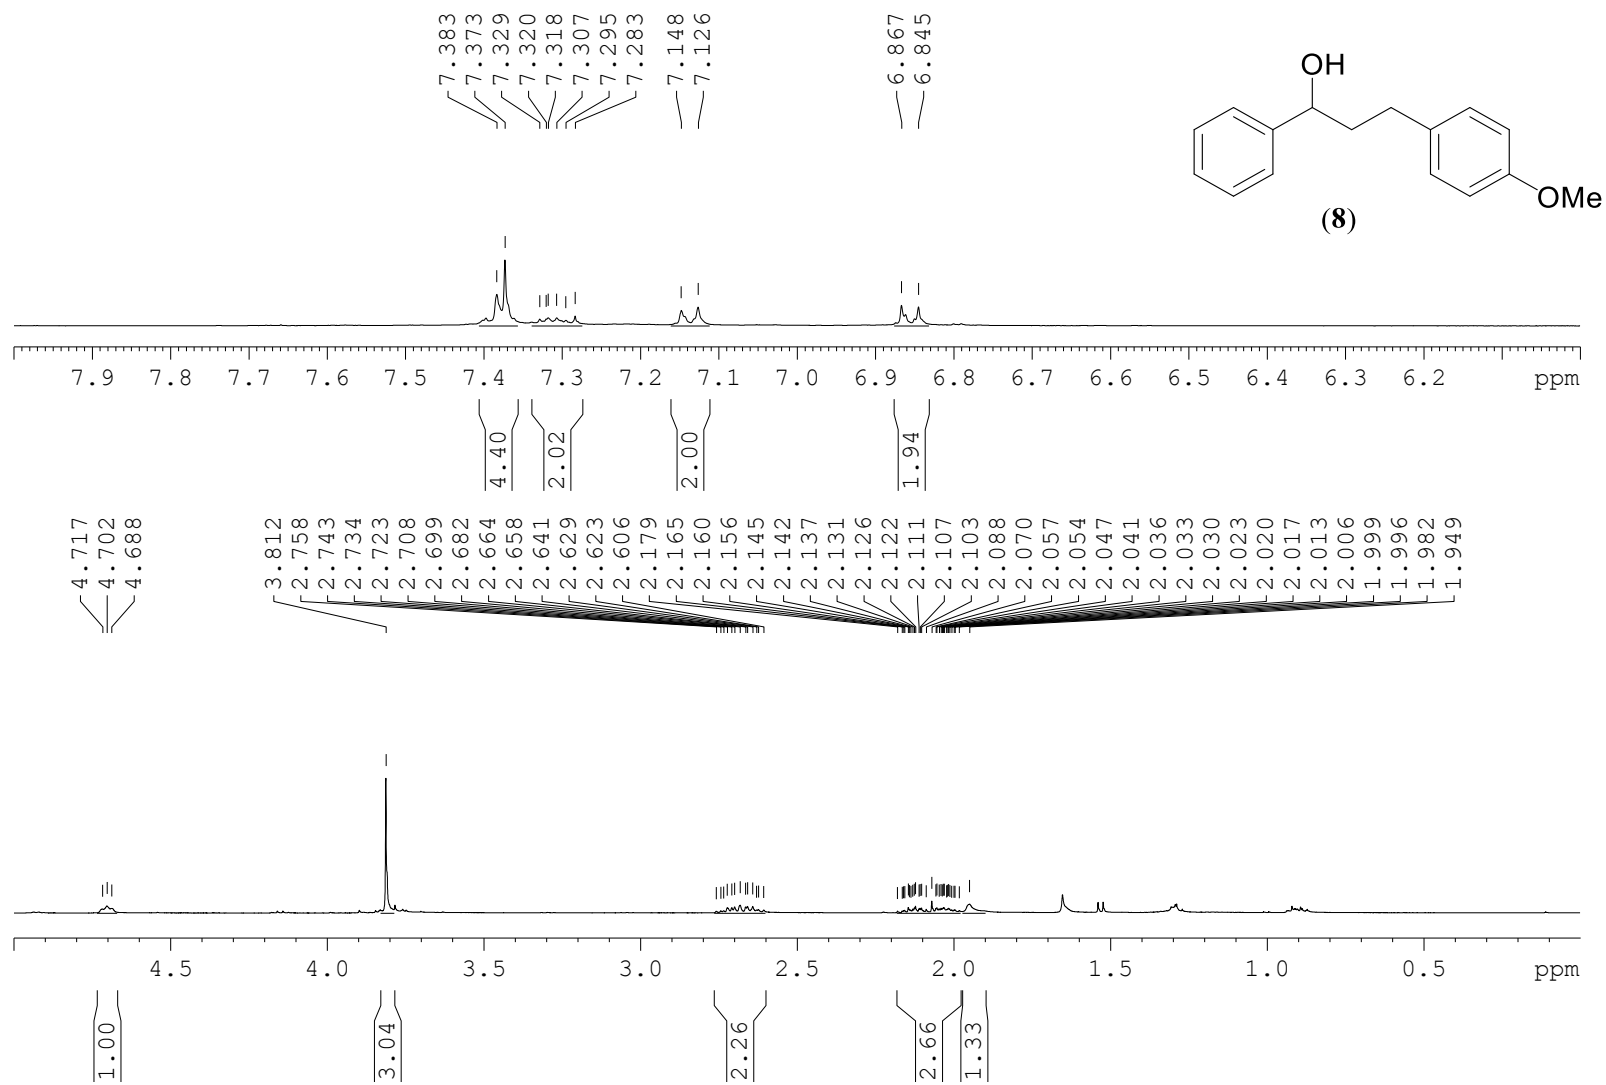

**Figure S62.** Expanded  $^1\text{H}$  NMR spectrum of (8) in  $\text{CDCl}_3$ .

PG-ST-02-176-04-13C

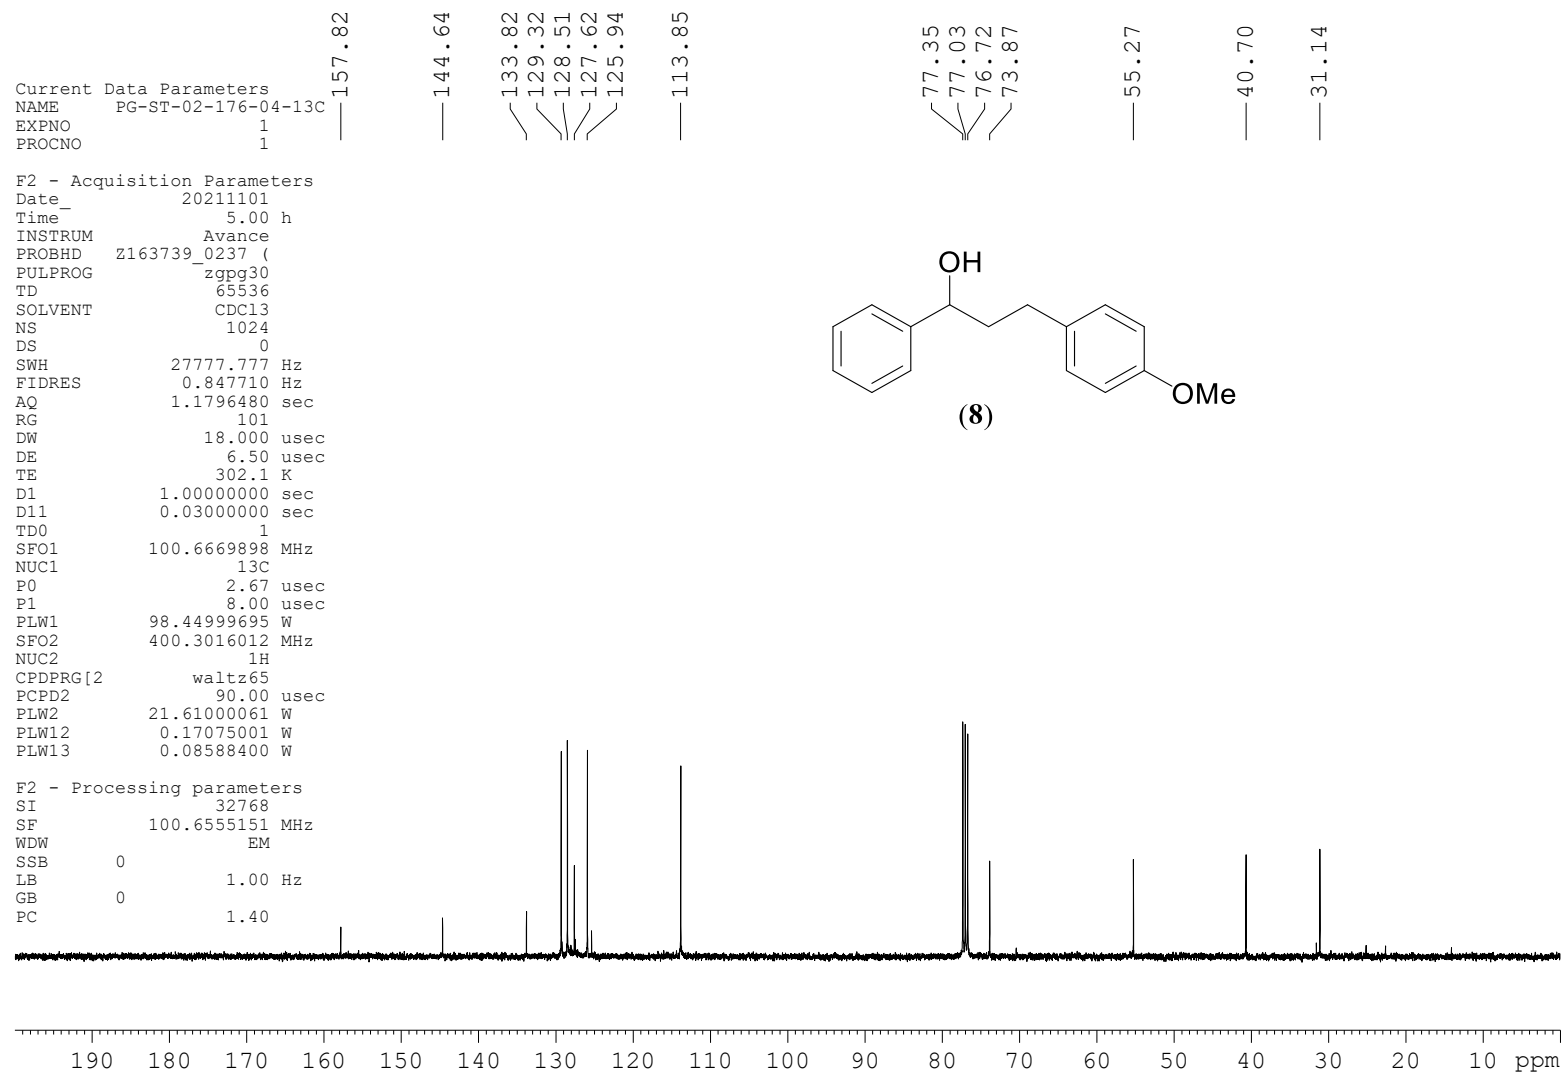

Figure S63.  $^{13}\text{C}\{^1\text{H}\}$  NMR spectrum of (8) in  $\text{CDCl}_3$ .

PG-ST-02-176-04-13C

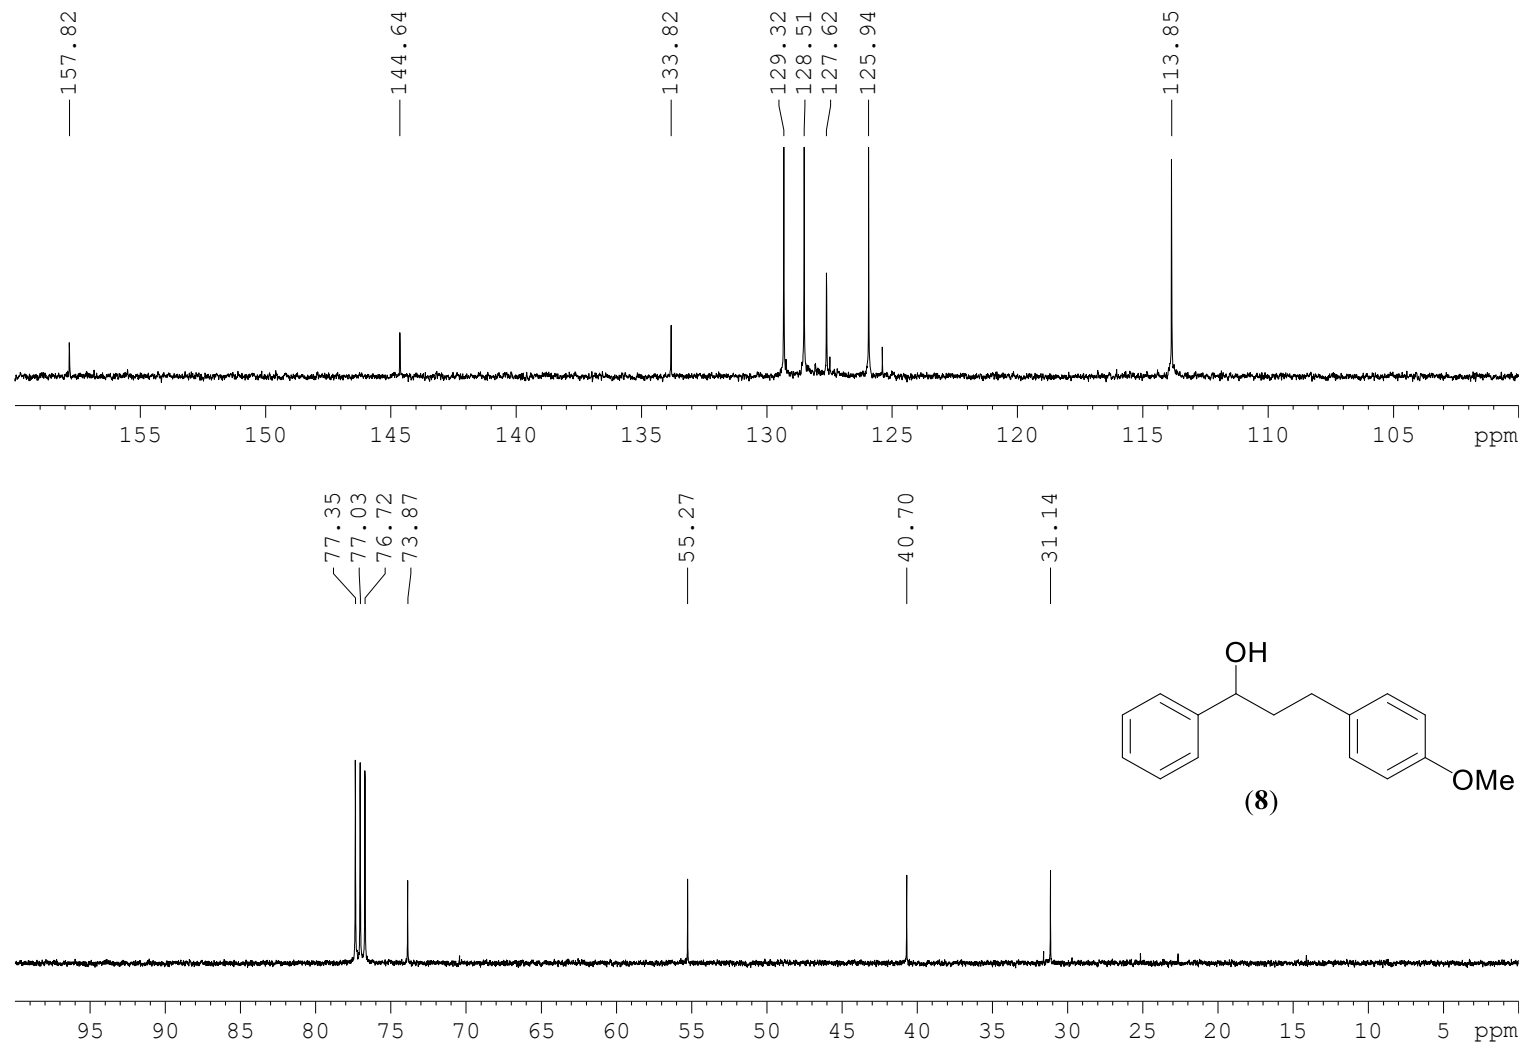

**Figure S64.** Expanded  $^{13}\text{C}\{^1\text{H}\}$  NMR spectrum of (8) in  $\text{CDCl}_3$

File : F:\GCMS-DATA-2021\OCT2021\PG-ST-02-176-04.D  
Operator : MK  
Acquired : 1 Nov 2021 18:43 using AcqMethod COMMONMETHOD-2020.M  
Instrument : GCMS  
Sample Name: PG-ST-02-176-04  
Misc Info :  
Vial Number: 7

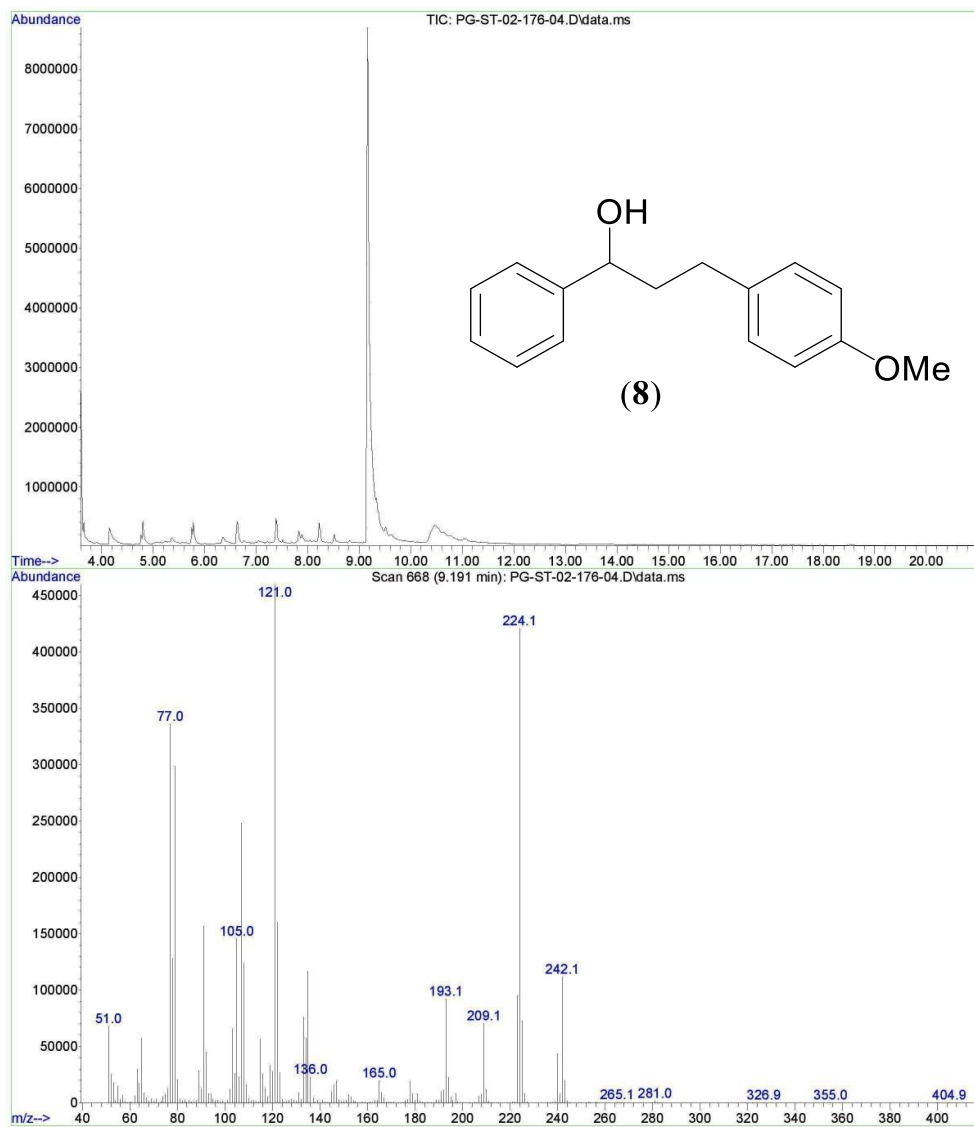

**Figure S65.** GCMS trace in EtOAc of (8) showing the  $M^+$  peak at  $m/z$  242.

| No. | Weight [mg] | Name            | Method     | N Area | C Area | H Area | N [%] | C [%] | H [%] | Date       | Time  | Info |
|-----|-------------|-----------------|------------|--------|--------|--------|-------|-------|-------|------------|-------|------|
| 23  | 0.7440      | PG-ST-02-176-04 | 2mgChem80s | 2 924  | 16 794 | 6 082  | 0.00  | 80.27 | 7.057 | 21-01-2022 | 16:40 | Su   |

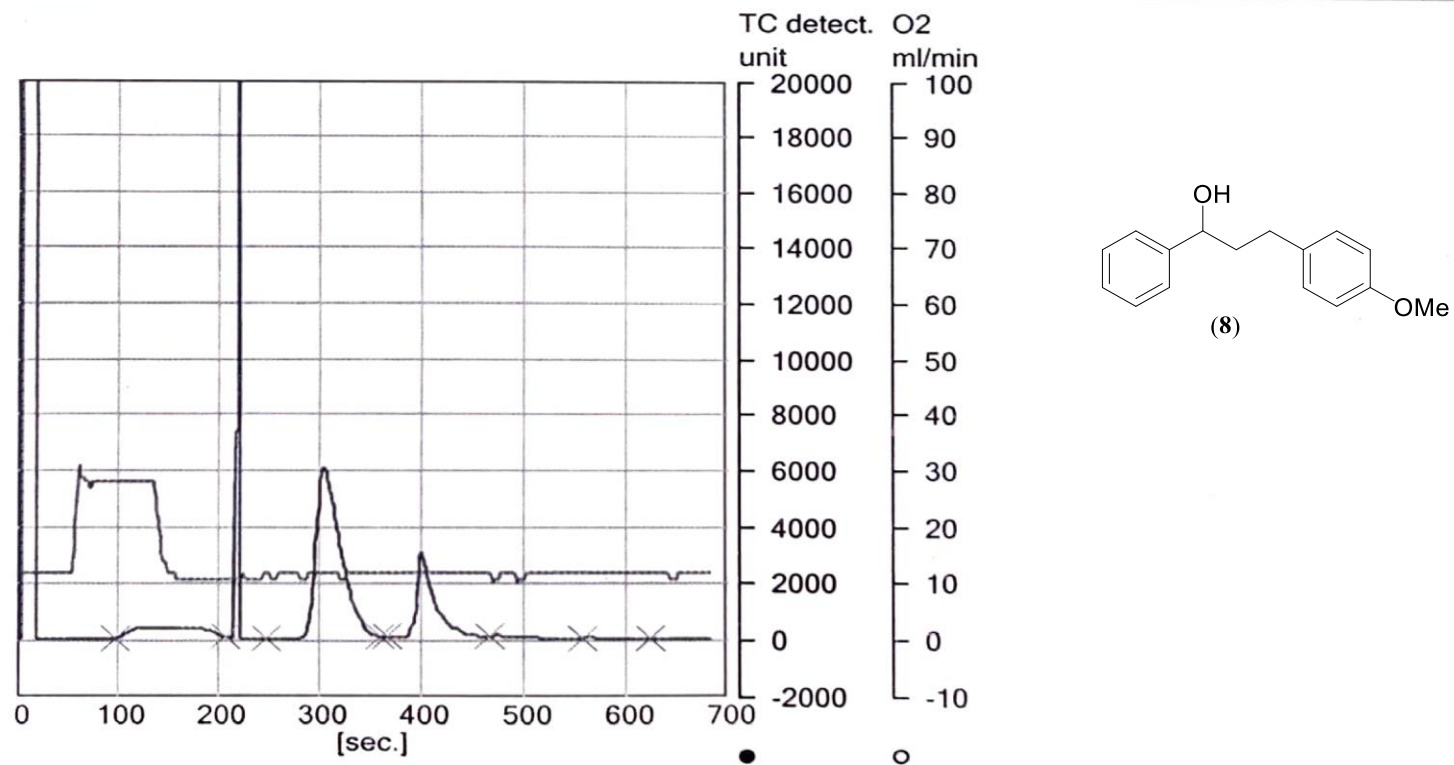

Figure S66. Elemental analysis data of (8).



PG-ST-02-186-03-1H

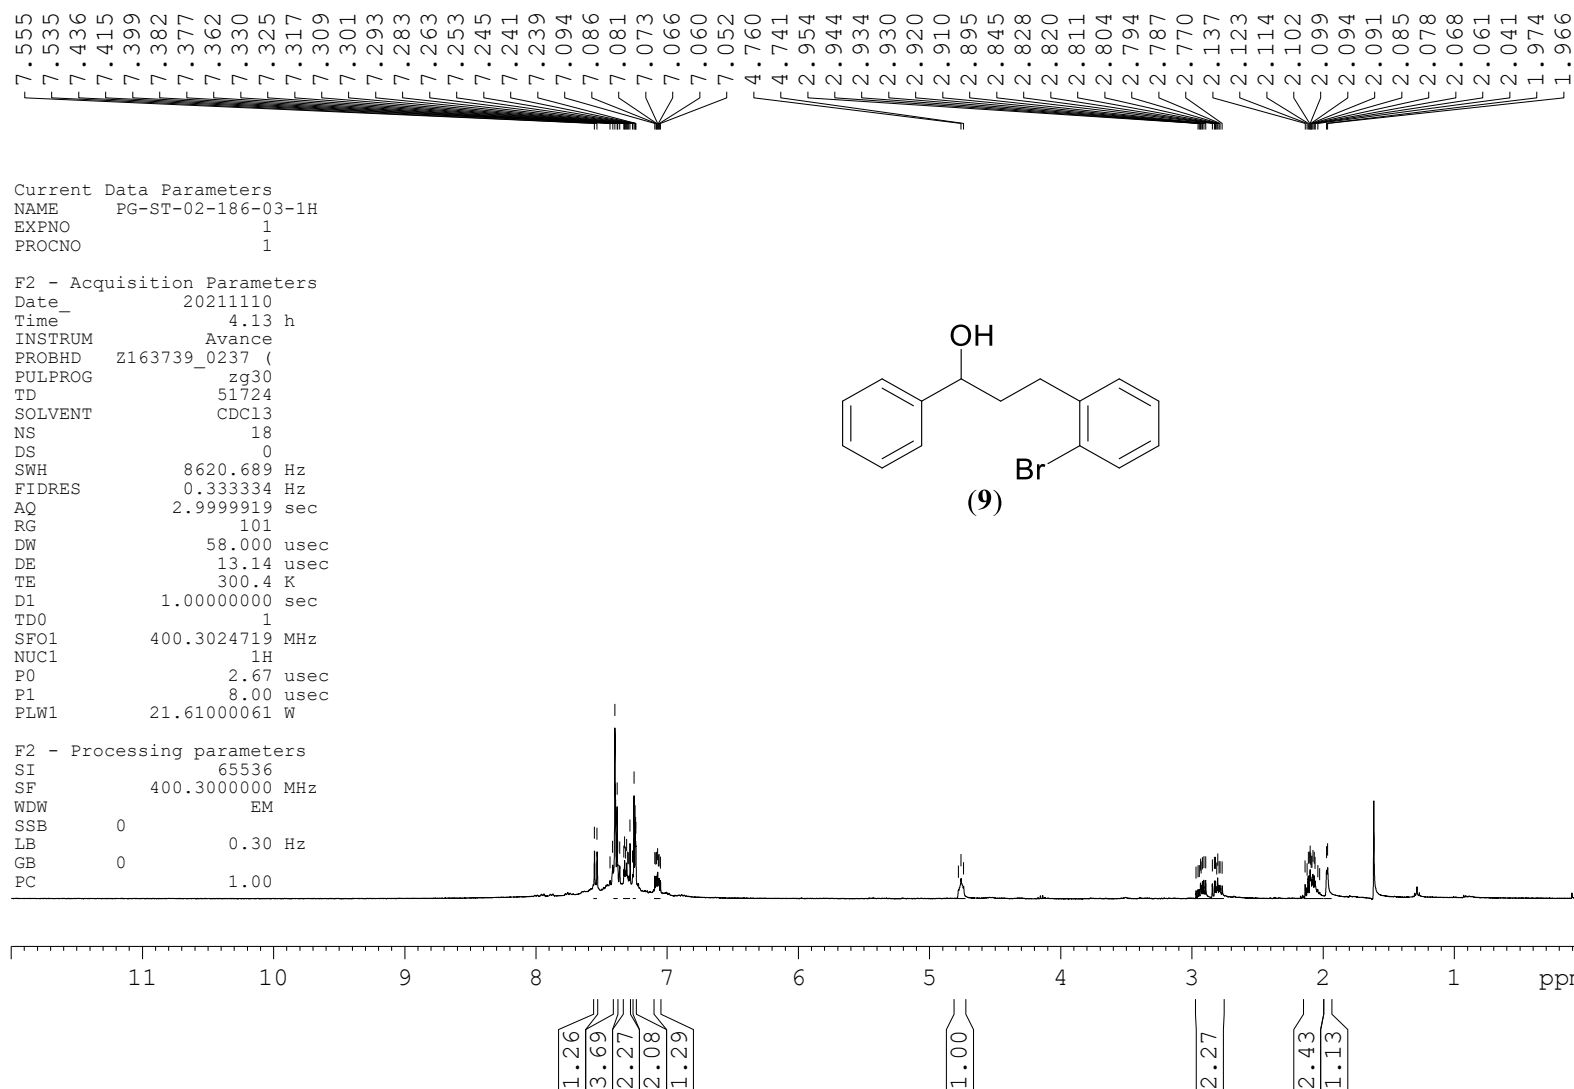

Figure S67.  $^1\text{H}$  NMR spectrum of (9) in  $\text{CDCl}_3$ .

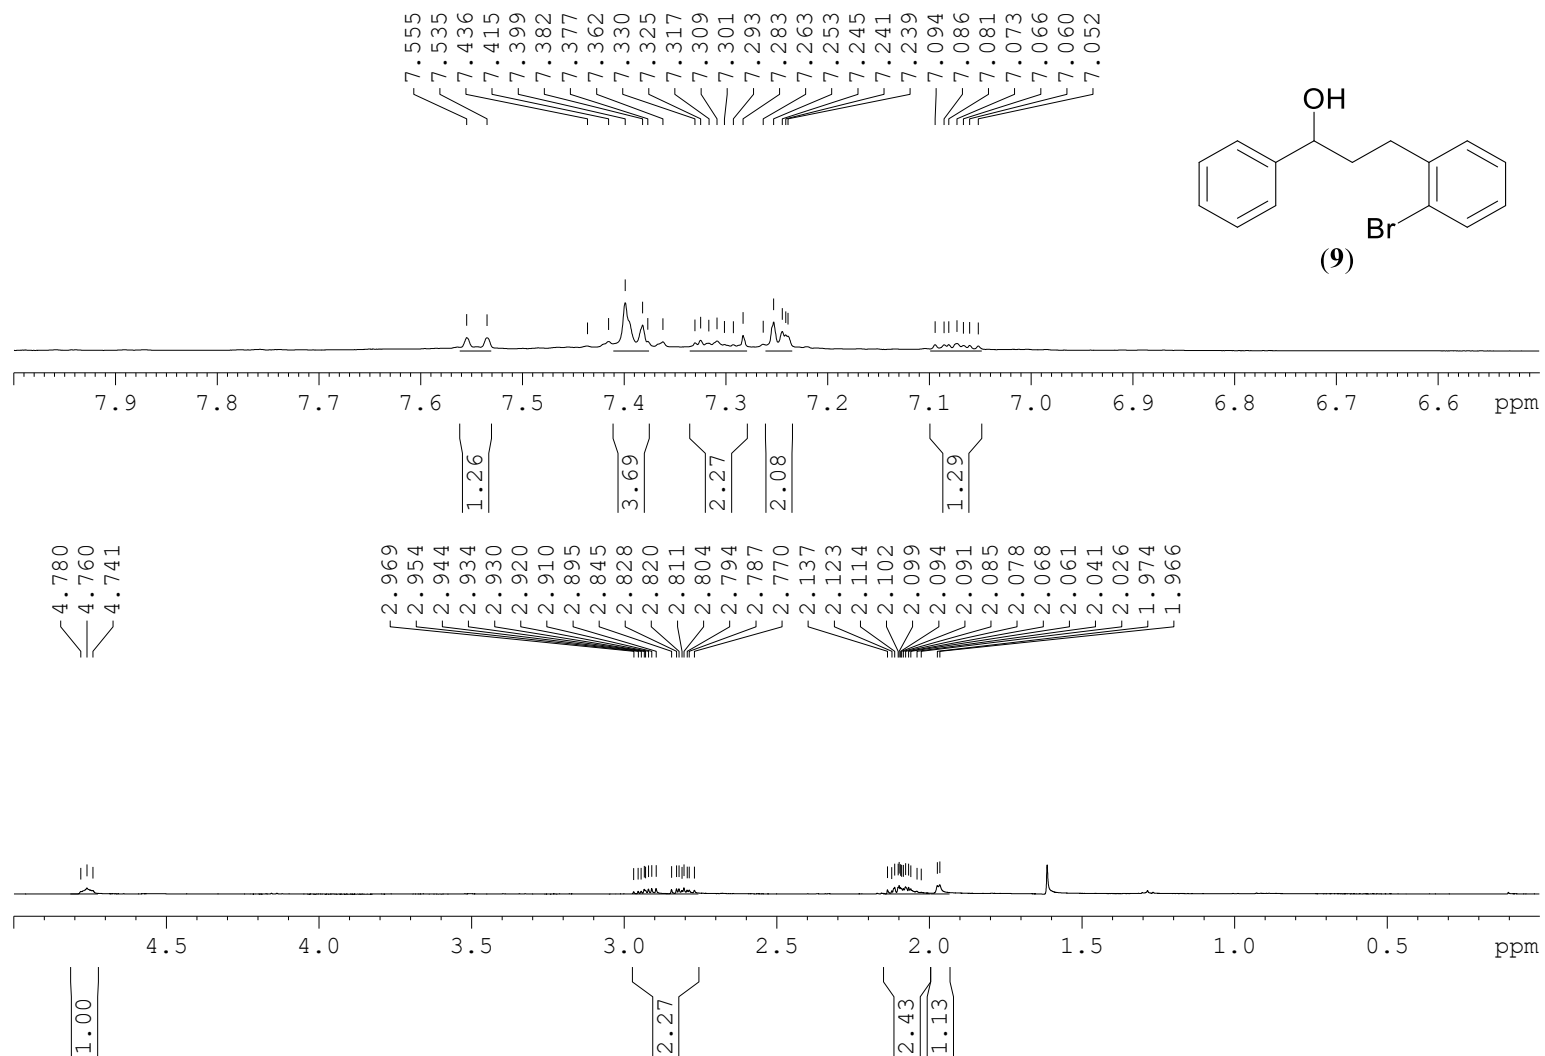

**Figure S68.** Expanded <sup>1</sup>H NMR spectrum of (9) in CDCl<sub>3</sub>.

PG-ST-02-186-03-13C

Current Data Parameters  
NAME PG-ST-02-186-03-13C  
EXPNO 10  
PROCNO 1

F2 - Acquisition Parameters  
Date\_ 20211110  
Time\_ 5.11 h  
INSTRUM Avance  
PROBHD Z163739\_0237 (  
PULPROG zgpg30  
TD 65536  
SOLVENT CDCl3  
NS 814  
DS 0  
SWH 27777.777 Hz  
FIDRES 0.847710 Hz  
AQ 1.1796480 sec  
RG 101  
DW 18.000 usec  
DE 6.50 usec  
TE 300.5 K  
D1 1.00000000 sec  
D11 0.03000000 sec  
TD0 1  
SFO1 100.6669898 MHz  
NUC1 13C  
P0 2.67 usec  
P1 8.00 usec  
PLW1 98.44999695 W  
SFO2 400.3016012 MHz  
NUC2 1H  
CPDPRG[2] waltz265  
PCPD2 90.00 usec  
PLW2 21.61000061 W  
PLW12 0.17075001 W  
PLW13 0.08588400 W

F2 - Processing parameters  
SI 32768  
SF 100.6555151 MHz  
WDW EM  
SSE 0  
LB 1.00 Hz  
GB 0  
PC 1.40

144.39  
141.16  
132.86  
130.41  
128.54  
127.69  
127.47  
125.92  
124.46

77.35  
77.03  
76.71  
73.94

38.92  
32.59

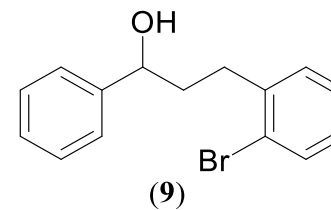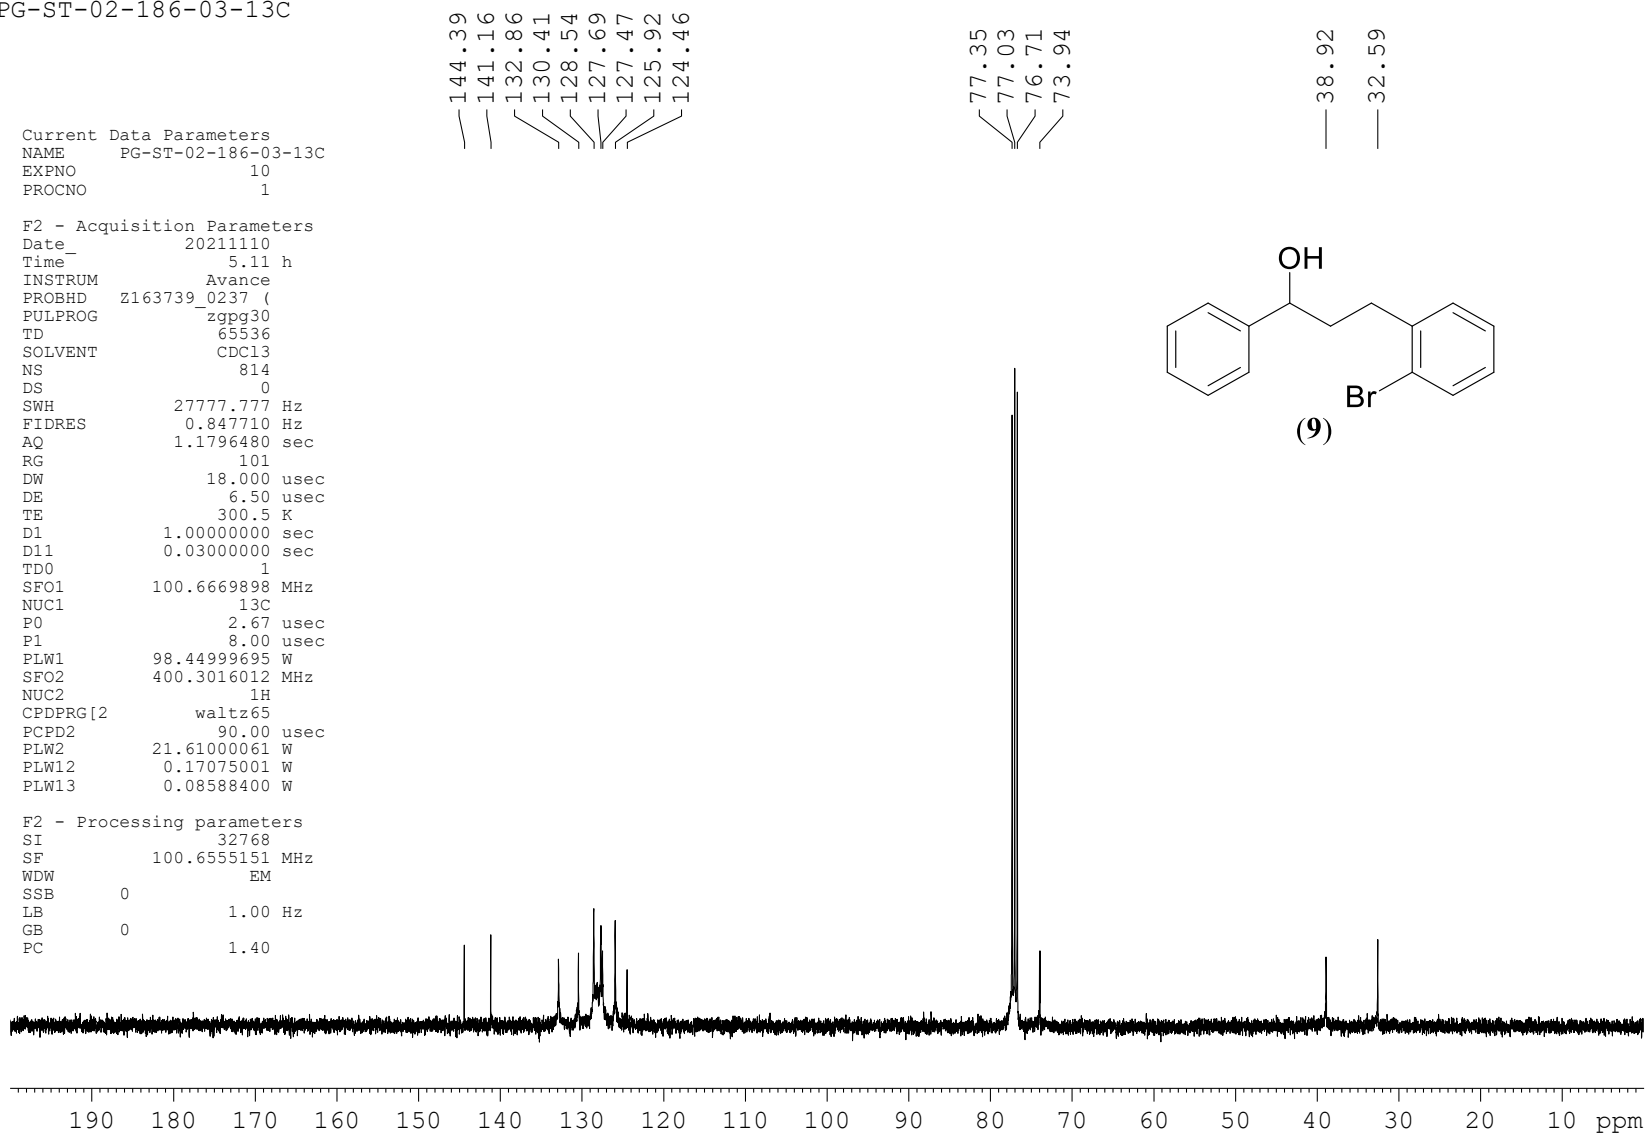

Figure S69.  $^{13}\text{C}\{^1\text{H}\}$  NMR spectrum of (9) in  $\text{CDCl}_3$ .

PG-ST-02-186-03-13C

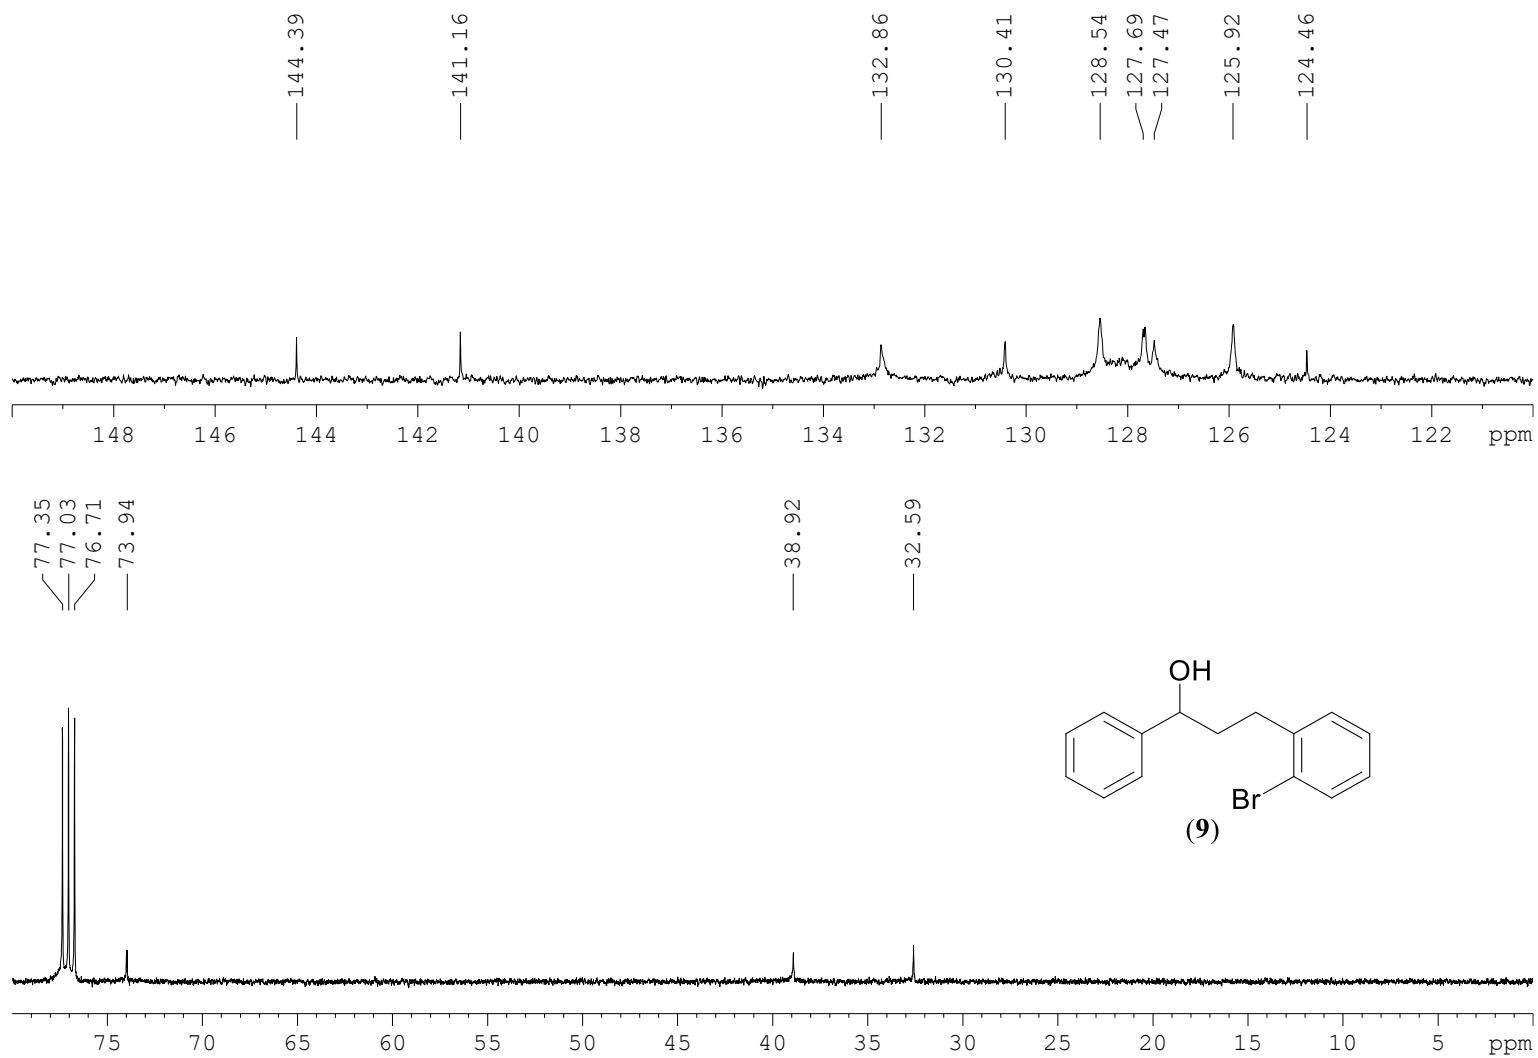

Figure S70. Expanded  $^{13}\text{C}\{^1\text{H}\}$  NMR spectrum of (9) in  $\text{CDCl}_3$ .

File : F:\GCMS-DATA-2021\OCT2021\PG-ST-02-186-03.D  
Operator : RM  
Acquired : 10 Nov 2021 18:33 using AcqMethod COMMONMETHOD-2010.M  
Instrument : GCMS  
Sample Name : PG-ST-02-186-03  
Misc Info :  
Vial Number : 2

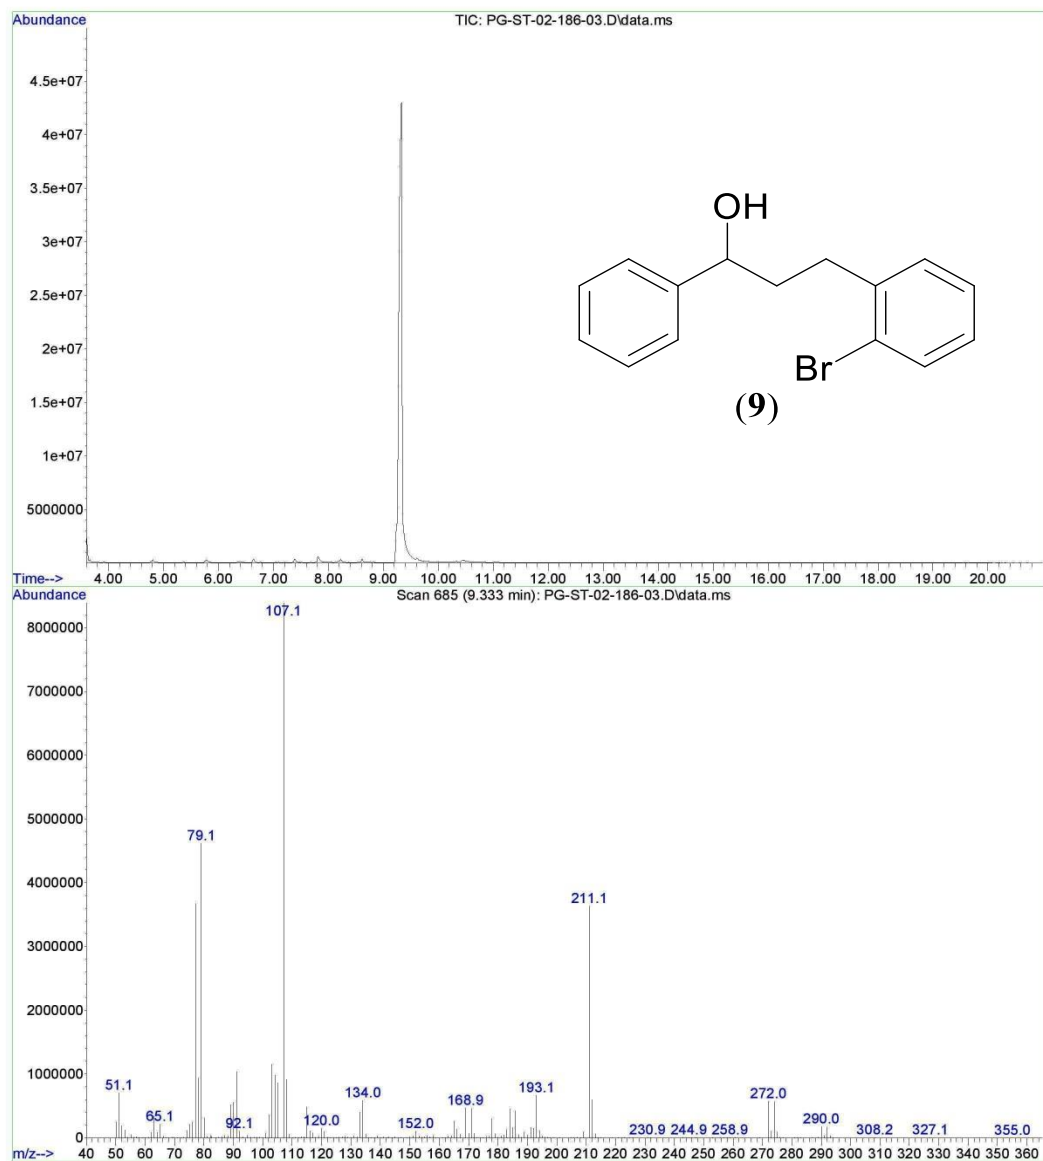

**Figure S71.** GCMS trace in EtOAc of (9) showing the  $M^+$  peak at  $m/z$  272.

| No. | Weight [mg] | Name           | Method     | N Area | C Area | H Area | N [%] | C [%] | H [%] | Date       | Time  | Info |
|-----|-------------|----------------|------------|--------|--------|--------|-------|-------|-------|------------|-------|------|
| 52  | 1.3140      | PG-ST-02-186-1 | 2mgChem80s | 2 895  | 23 347 | 6 333  | 0.00  | 62.24 | 4.617 | 11-11-2021 | 19:55 |      |

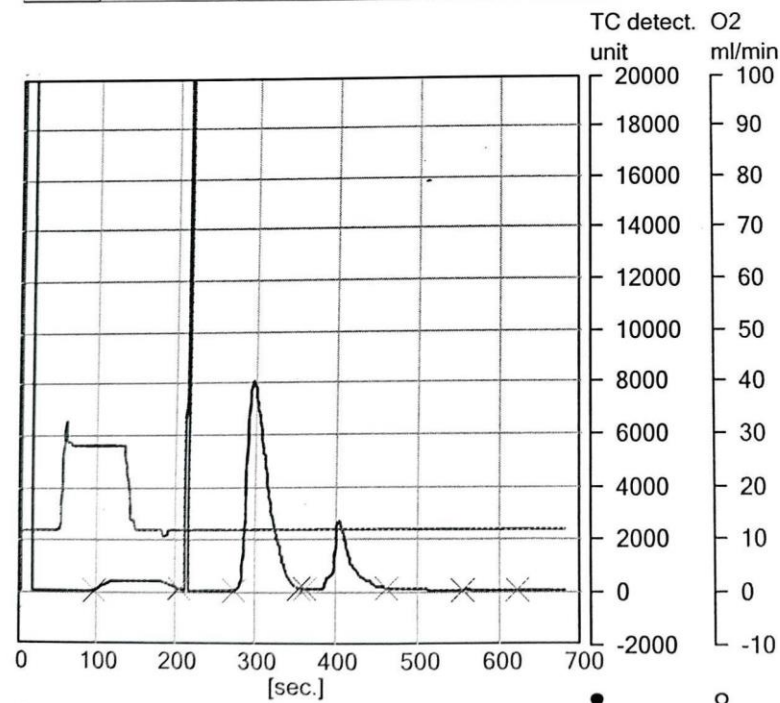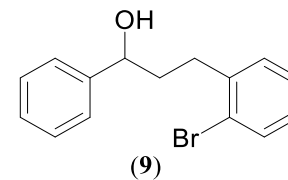

Name: eassuperuser, Access: VarioMICRO administrator

12-11-2021 10:05:02

varioMICRO V4.0.1 (aeb1e0e)2015-10-12, CHNS Mode, Ser. No.: 15154051  
Elementar Analysensysteme GmbH

Page 2 (of 2)

Scanned by TapScanner

Figure S72. Elemental analysis data of (9).

PG-ST-02-178-01-1H-2

Current Data Parameters  
NAME PG-ST-02-178-01-1H-2  
EXPNO 1  
PROCNO 1

F2 - Acquisition Parameters  
Date\_ 20211103  
Time 5.16 h  
INSTRUM Avance  
PROBHD Z163739\_0237 (  
PULPROG zg30  
TD 51724  
SOLVENT CDCl3  
NS 18  
DS 0  
SWH 8620.689 Hz  
FIDRES 0.333334 Hz  
AQ 2.9999919 sec  
RG 101  
DW 58.000 usec  
DE 13.14 usec  
TE 298.6 K  
D1 1.00000000 sec  
TD0 1  
SF01 400.3024719 MHz  
NUC1 1H  
P0 2.67 usec  
P1 8.00 usec  
PLW1 21.61000061 W

F2 - Processing parameters  
SI 65536  
SF 400.3000000 MHz  
WDW EM  
SSB 0  
LB 0.30 Hz  
GB 0  
PC 1.00

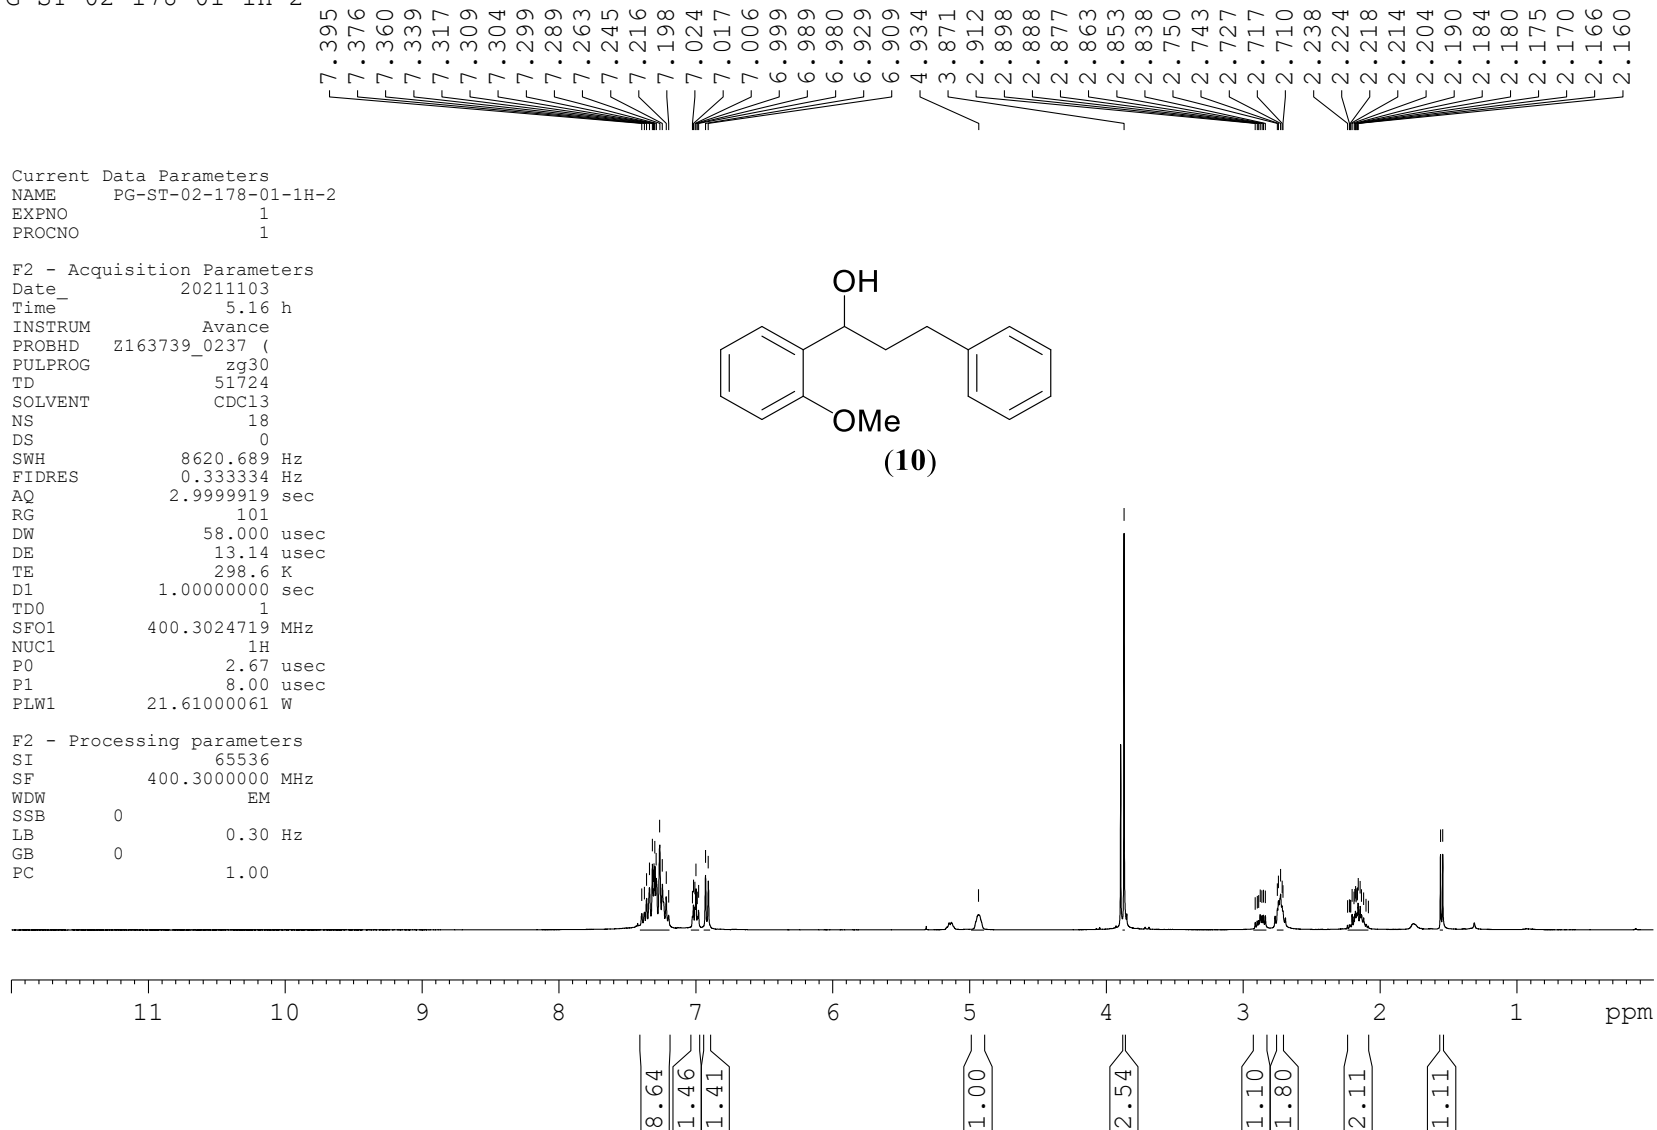

Figure S73.  $^1\text{H}$  NMR spectrum of (10) in  $\text{CDCl}_3$ .

PG-ST-02-178-01-1H-2

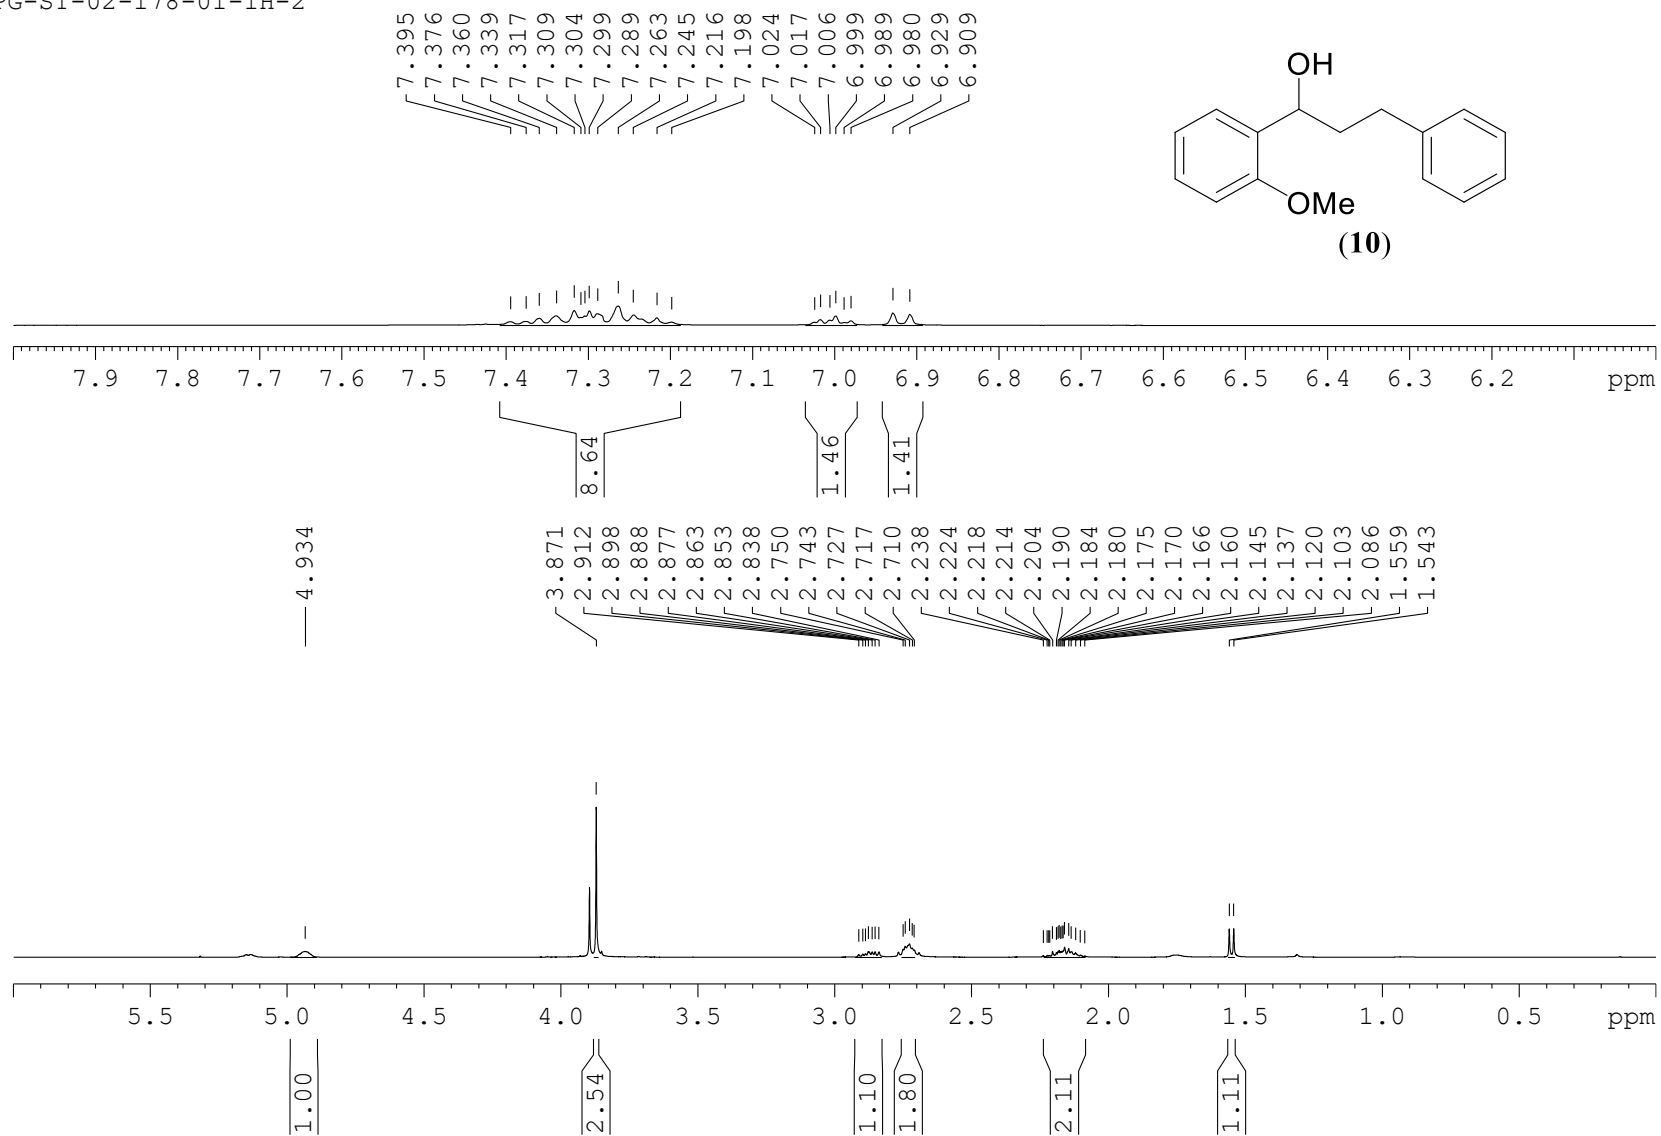

**Figure S74.** Expanded  $^1\text{H}$  NMR spectrum of (10) in  $\text{CDCl}_3$ .



PG-ST-02-178-01-13C-2

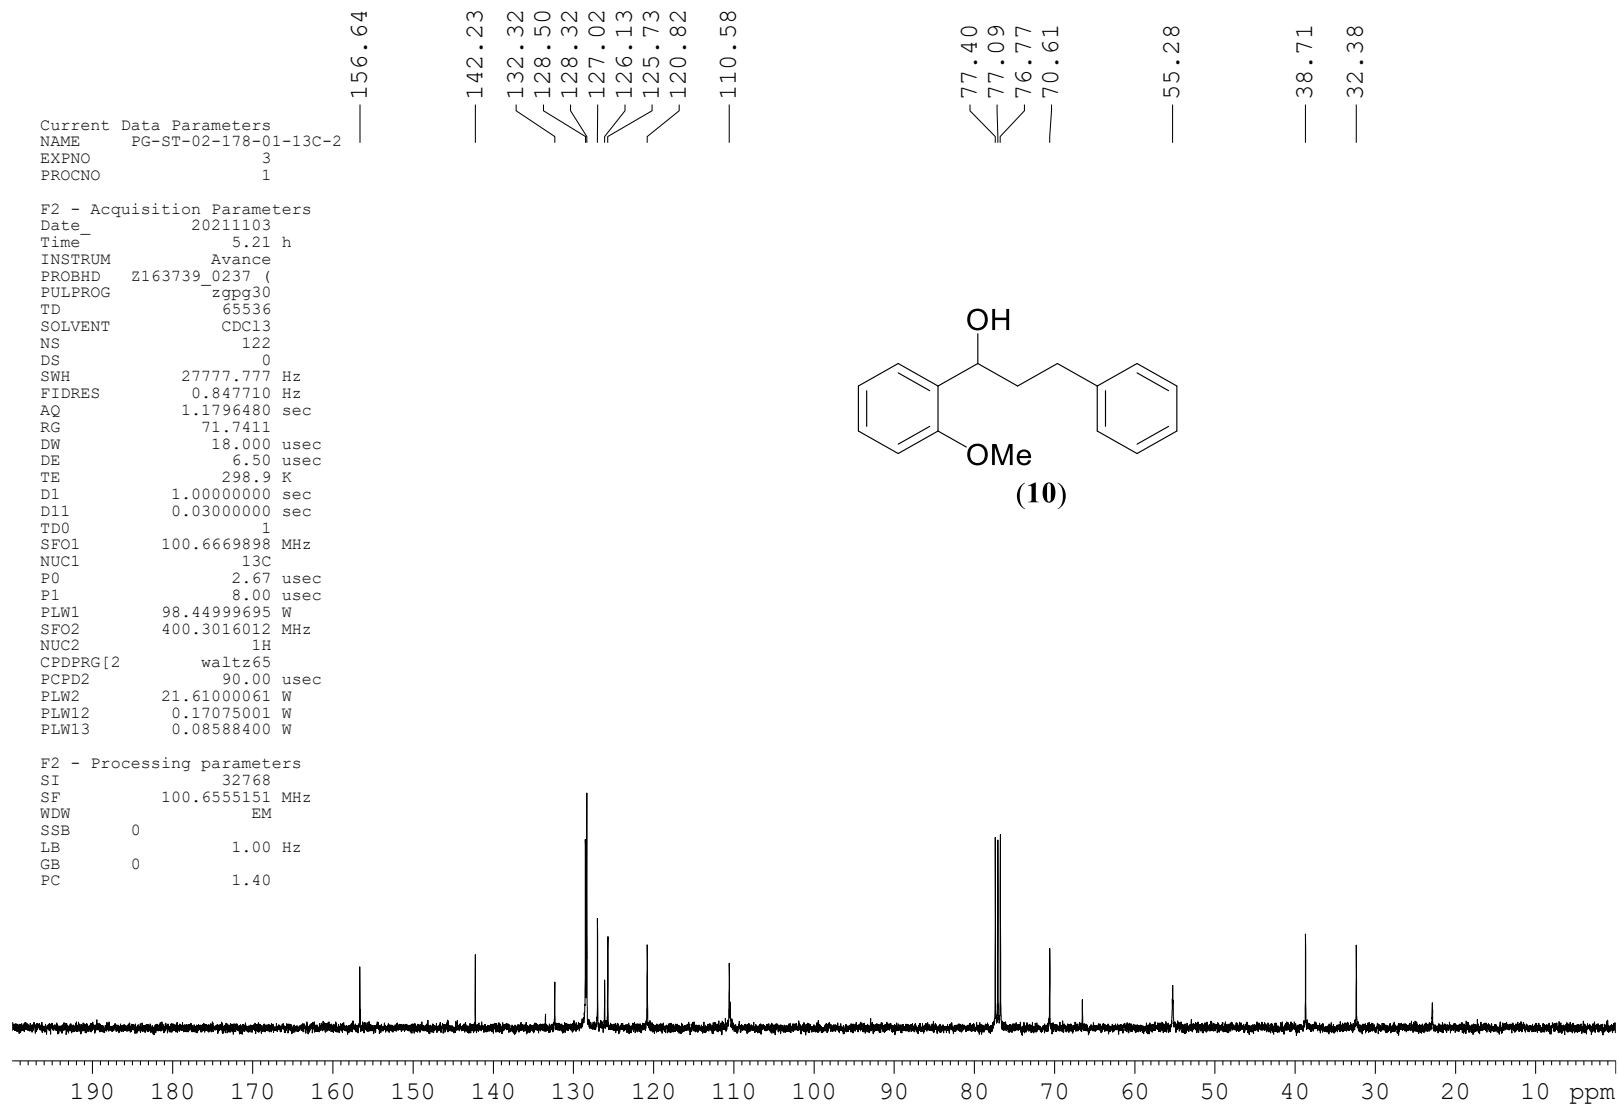

Figure S75.  $^{13}\text{C}\{^1\text{H}\}$  NMR spectrum of (10) in  $\text{CDCl}_3$ .

PG-ST-02-178-01-13C-2

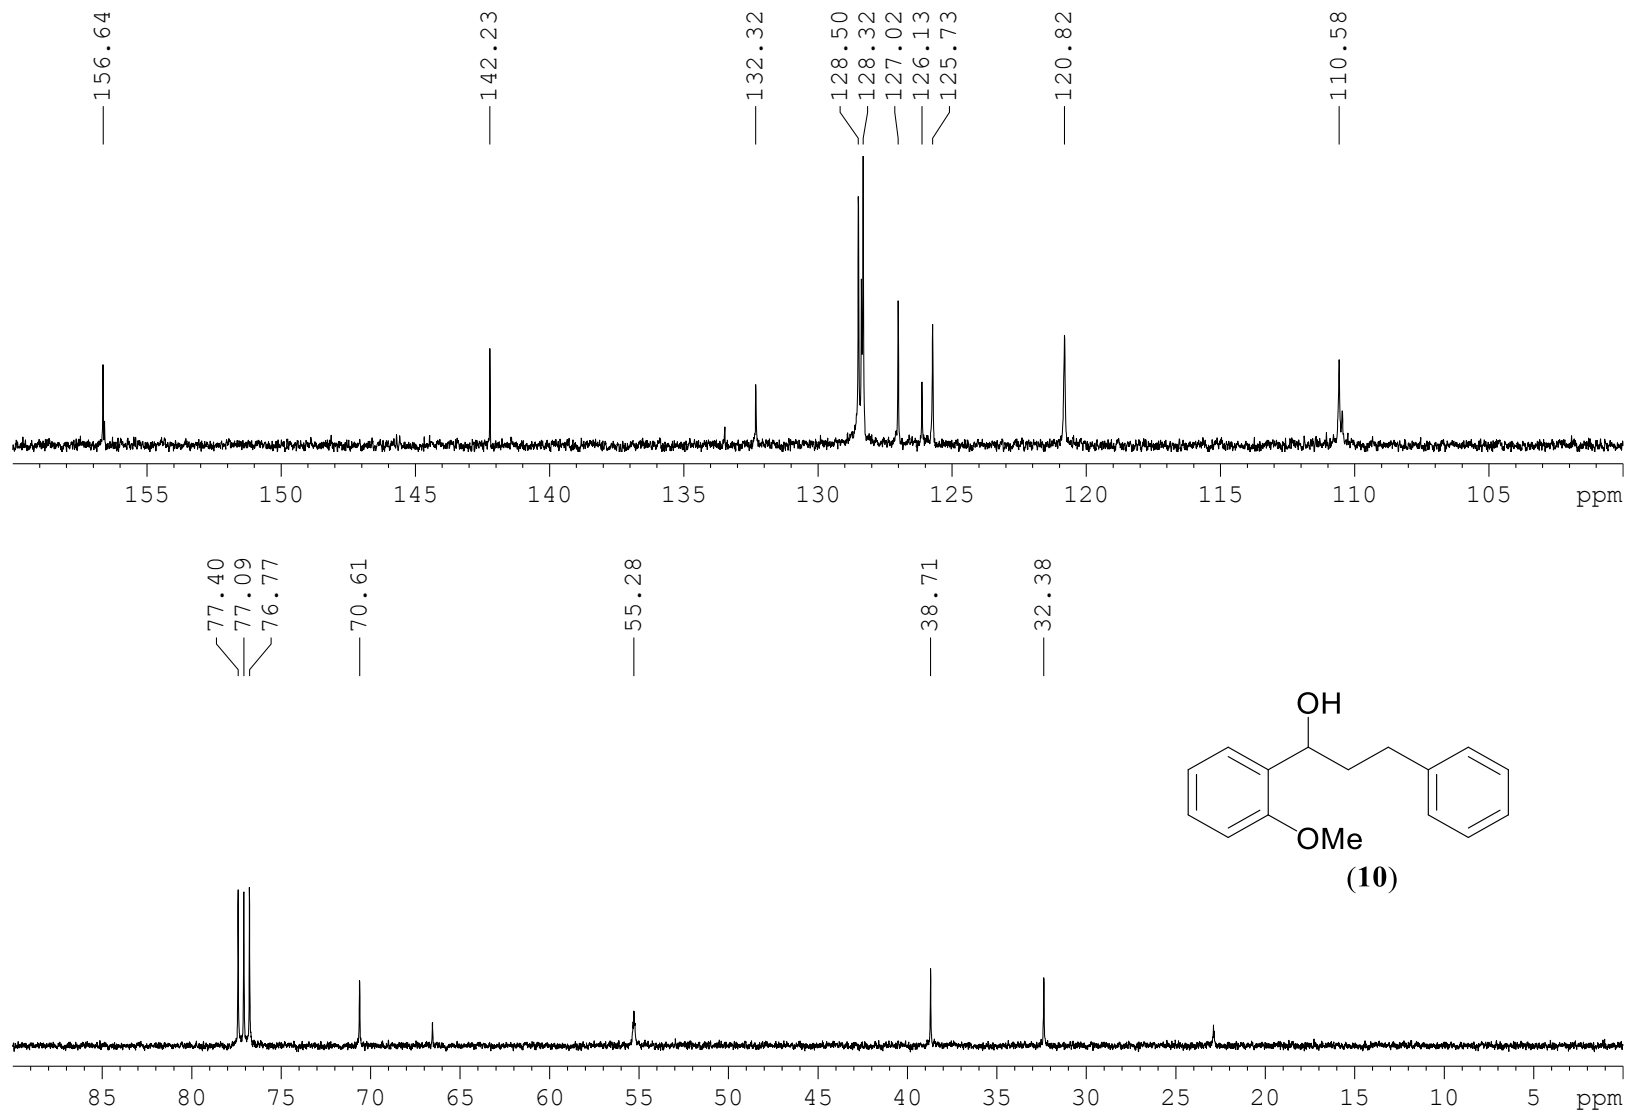

Figure S76. Expanded  $^{13}\text{C}\{^1\text{H}\}$  NMR spectrum of **(10)** in  $\text{CDCl}_3$ .

File : F:\GCMS-DATA-2021\NOV2021\PG-ST-02-178-01-1.D  
Operator : RM  
Acquired : 11 Nov 2021 15:24 using AcqMethod COMMONMETHOD-2010.M  
Instrument : GCMS  
Sample Name: PG-ST-02-178-01-1  
Misc Info :  
Vial Number: 3

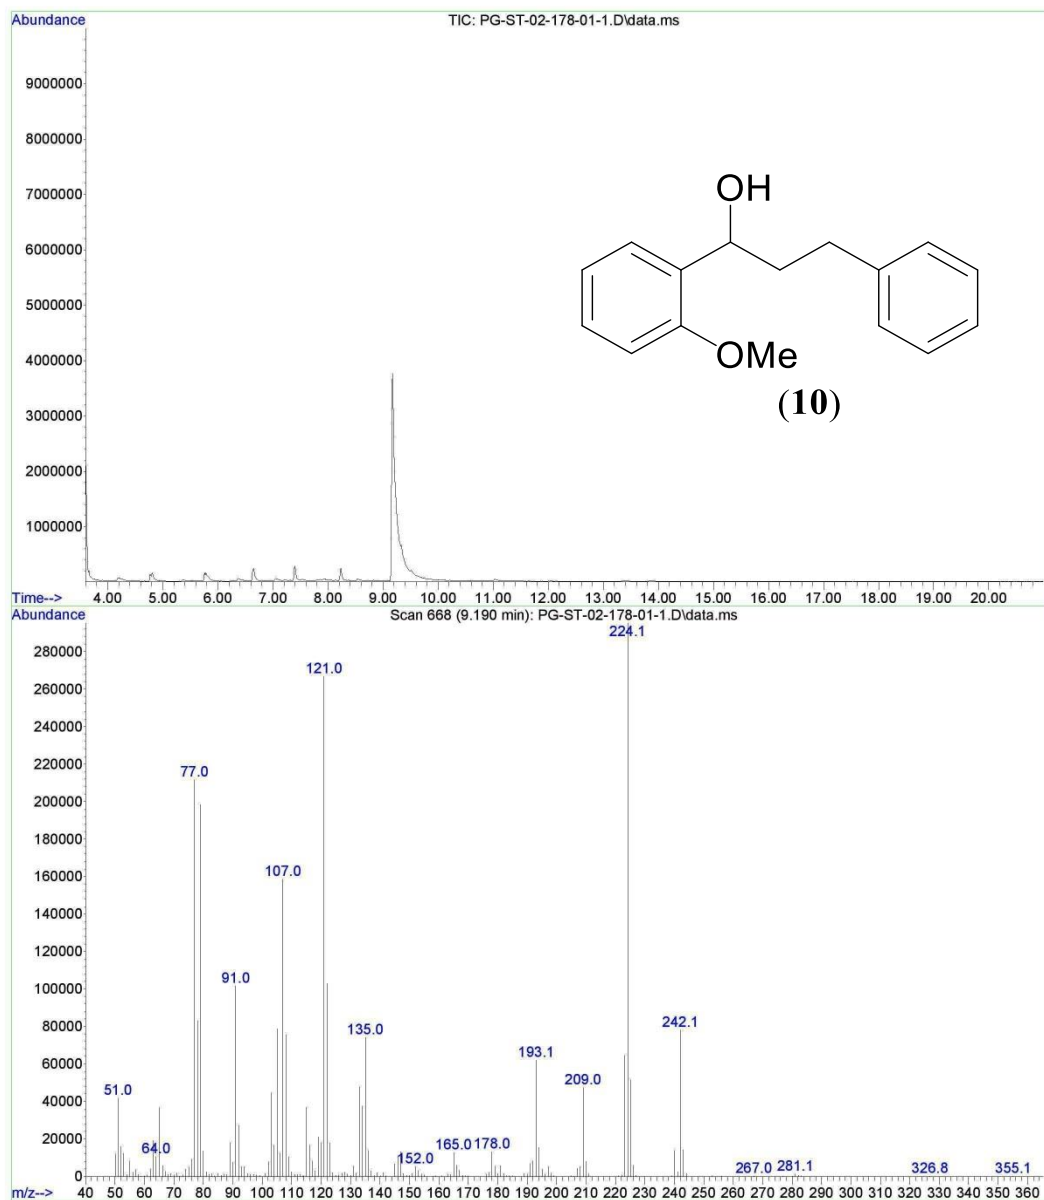

Figure S77. GCMS trace in EtOAc of (10) showing the  $M^+$  peak at  $m/z$  242.

Document: CHNS16112021 (varioMICRO) from: --- (modified)

SP18022016  
varioMICRO CHNS  
serial number: 15154051

Graphic report

| No. | Weight [mg] | Name            | Method     | N Area | C Area | H Area | N [%] | C [%] | H [%] | Date       | Time  | Info |
|-----|-------------|-----------------|------------|--------|--------|--------|-------|-------|-------|------------|-------|------|
| 70  | 0.7400      | PG-ST-02-178-01 | 2mgChem80s | 2 875  | 16 420 | 5 324  | 0.00  | 79.93 | 6.379 | 16-11-2021 | 23:19 |      |

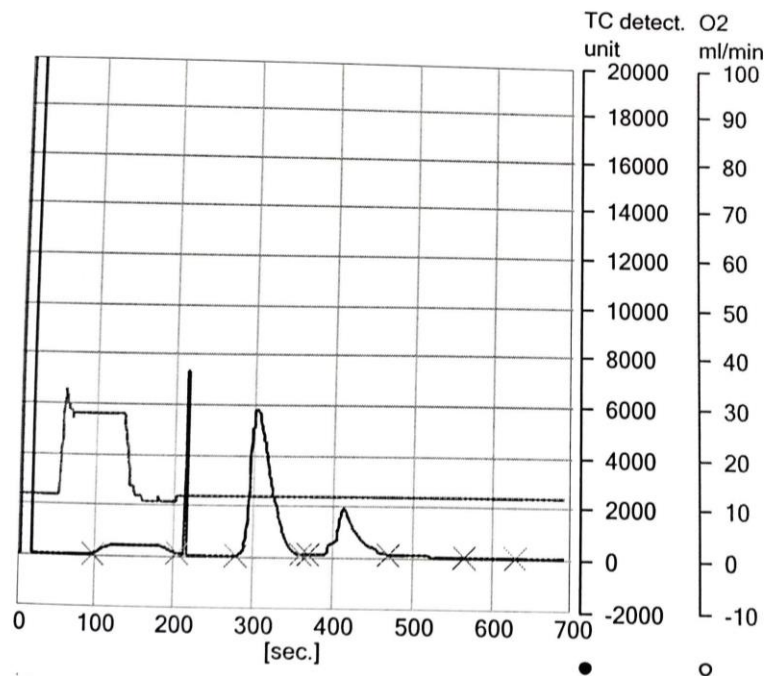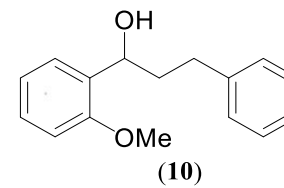

Figure S78. Elemental analysis data of (10).

PG-ST-02-195-07-1H

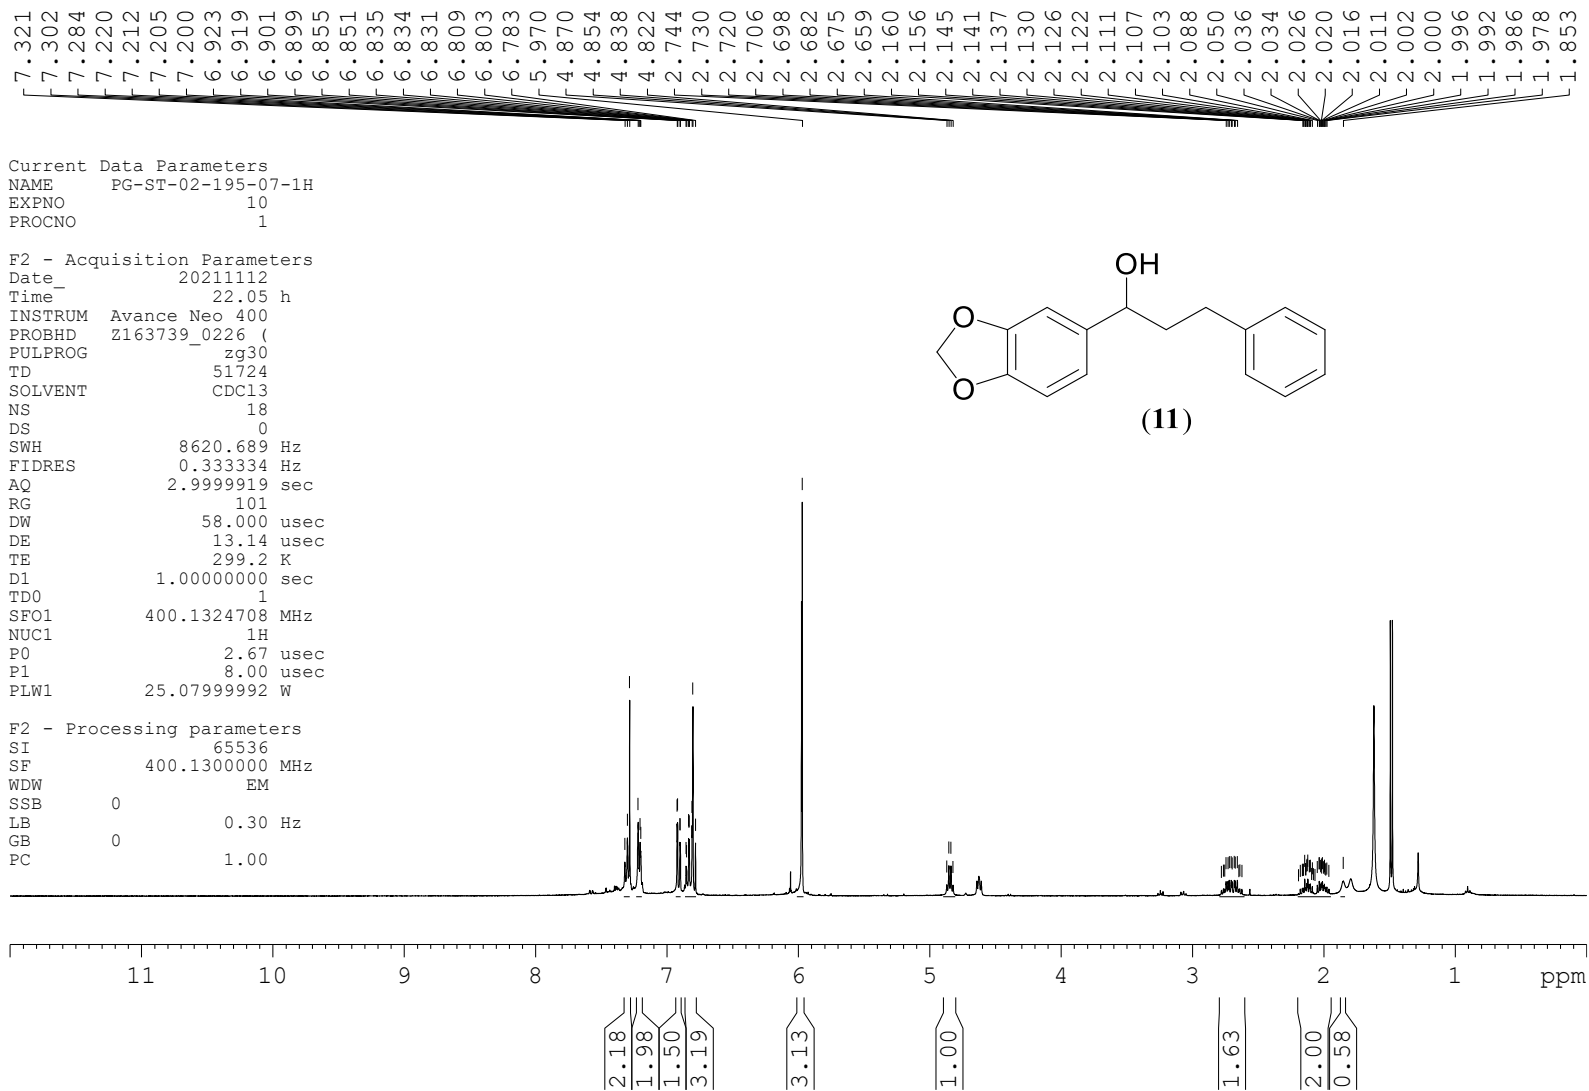

Figure S79. <sup>1</sup>H NMR spectrum of (11) in CDCl<sub>3</sub>.

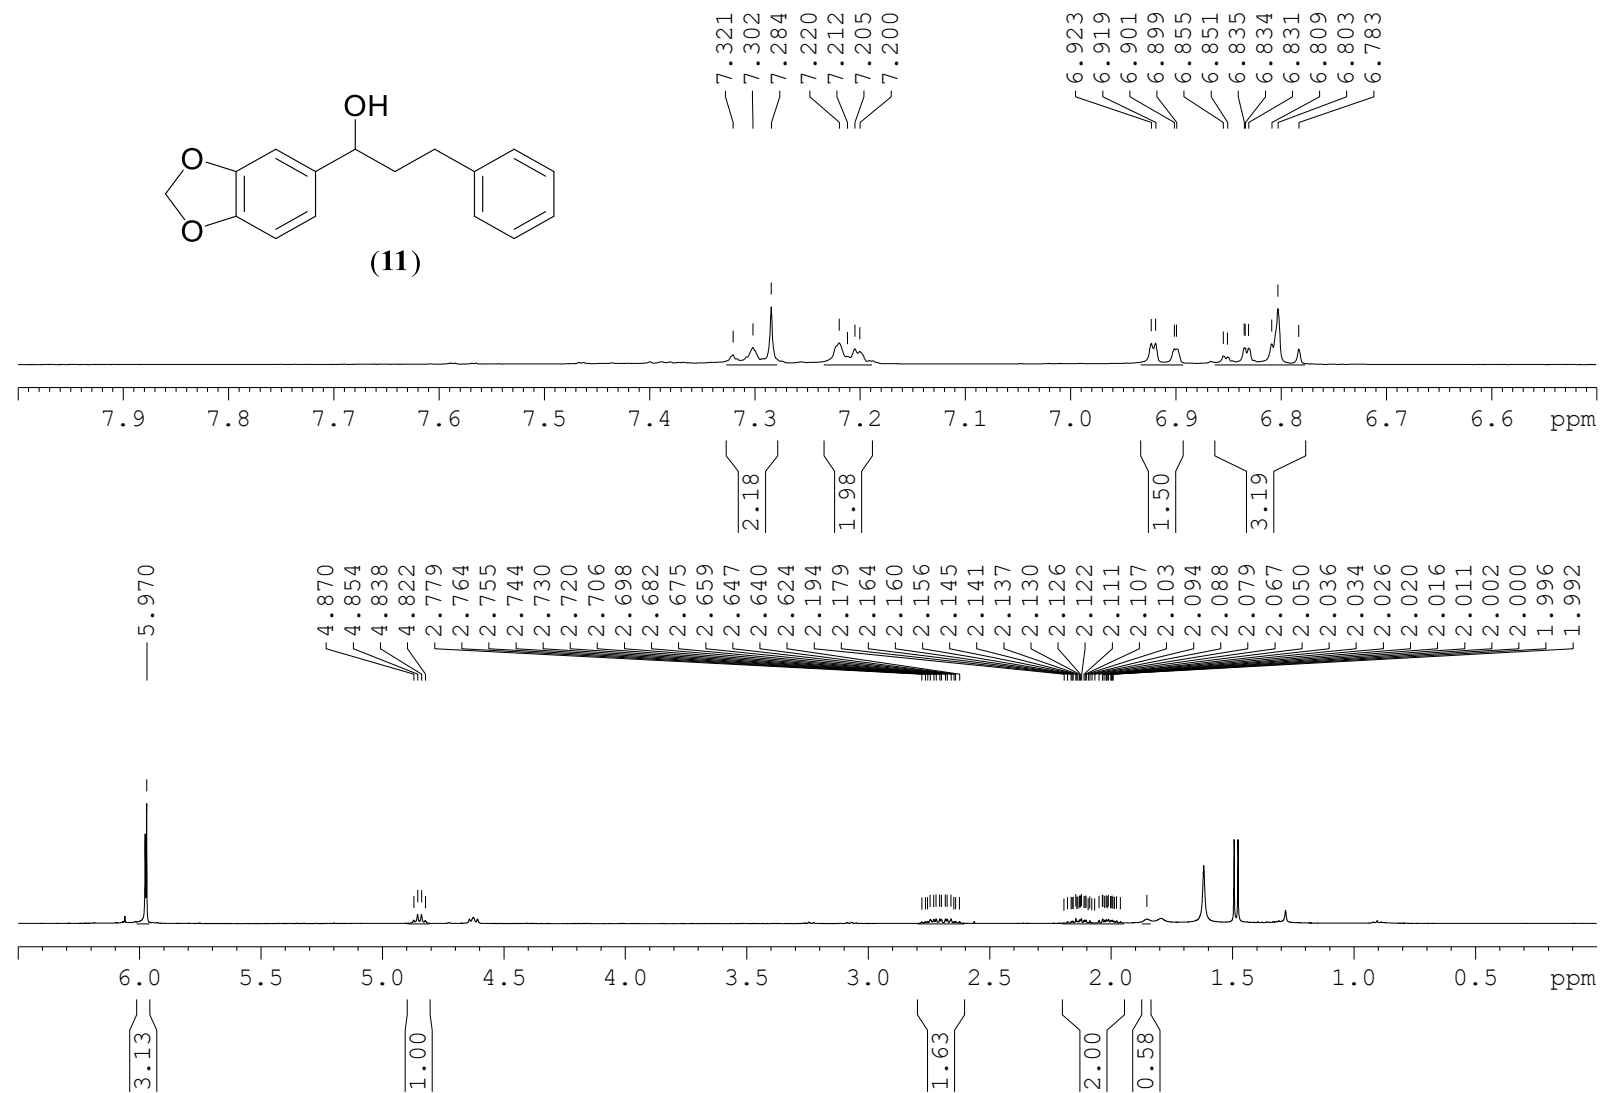**Figure S80.** Expanded  $^1\text{H}$  NMR spectrum of **(11)** in  $\text{CDCl}_3$ .

PG-ST-02-180-05-13C

Current Data Parameters  
NAME PG-ST-02-180-05-13C  
EXPNO 12  
PROCNO 1

F2 - Acquisition Parameters  
Date\_ 20211102  
Time\_ 22.41 h  
INSTRUM Avance Neo 400  
PROBHD Z163739\_0226 (  
PULPROG \_zgpg30  
TD 65536  
SOLVENT CDCl3  
NS 500  
DS 2  
SWH 27777.777 Hz  
FIDRES 0.847710 Hz  
AQ 1.1796480 sec  
RG 101  
DW 18.000 usec  
DE 6.50 usec  
TE 299.3 K  
D1 1.00000000 sec  
D11 0.03000000 sec  
TD0 1  
SFO1 100.6242384 MHz  
NUC1 13C  
P0 2.67 usec  
P1 8.00 usec  
PLW1 99.33999634 W  
SFO2 400.1316005 MHz  
NUC2 1H  
CPDPRG[2] waltz65  
PCPD2 90.00 usec  
PLW2 25.07999992 W  
PLW12 0.19815999 W  
PLW13 0.09967500 W

F2 - Processing parameters  
SI 32768  
SF 100.6127685 MHz  
WDW EM  
SSB 0  
LB 1.00 Hz  
GB 0  
PC 1.40

151.74  
147.86  
147.00  
141.76  
138.69

128.44  
128.41  
125.88  
119.41

108.11  
106.43  
101.02

77.39  
77.07  
76.75  
73.75

40.42

32.08

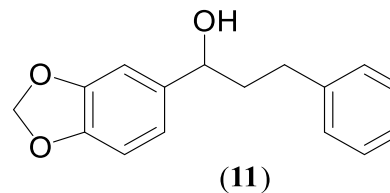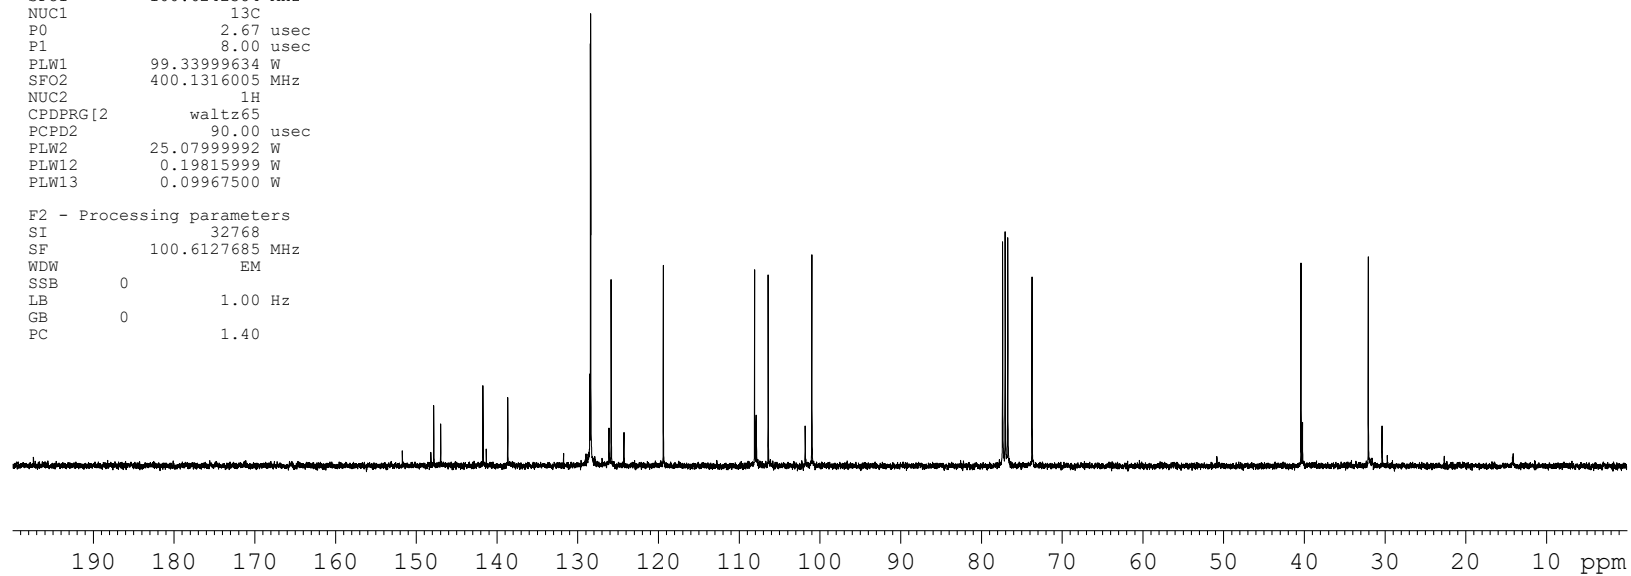

Figure S81.  $^{13}\text{C}\{^1\text{H}\}$  NMR spectrum of (11) in  $\text{CDCl}_3$ .

PG-ST-02-180-05-13C

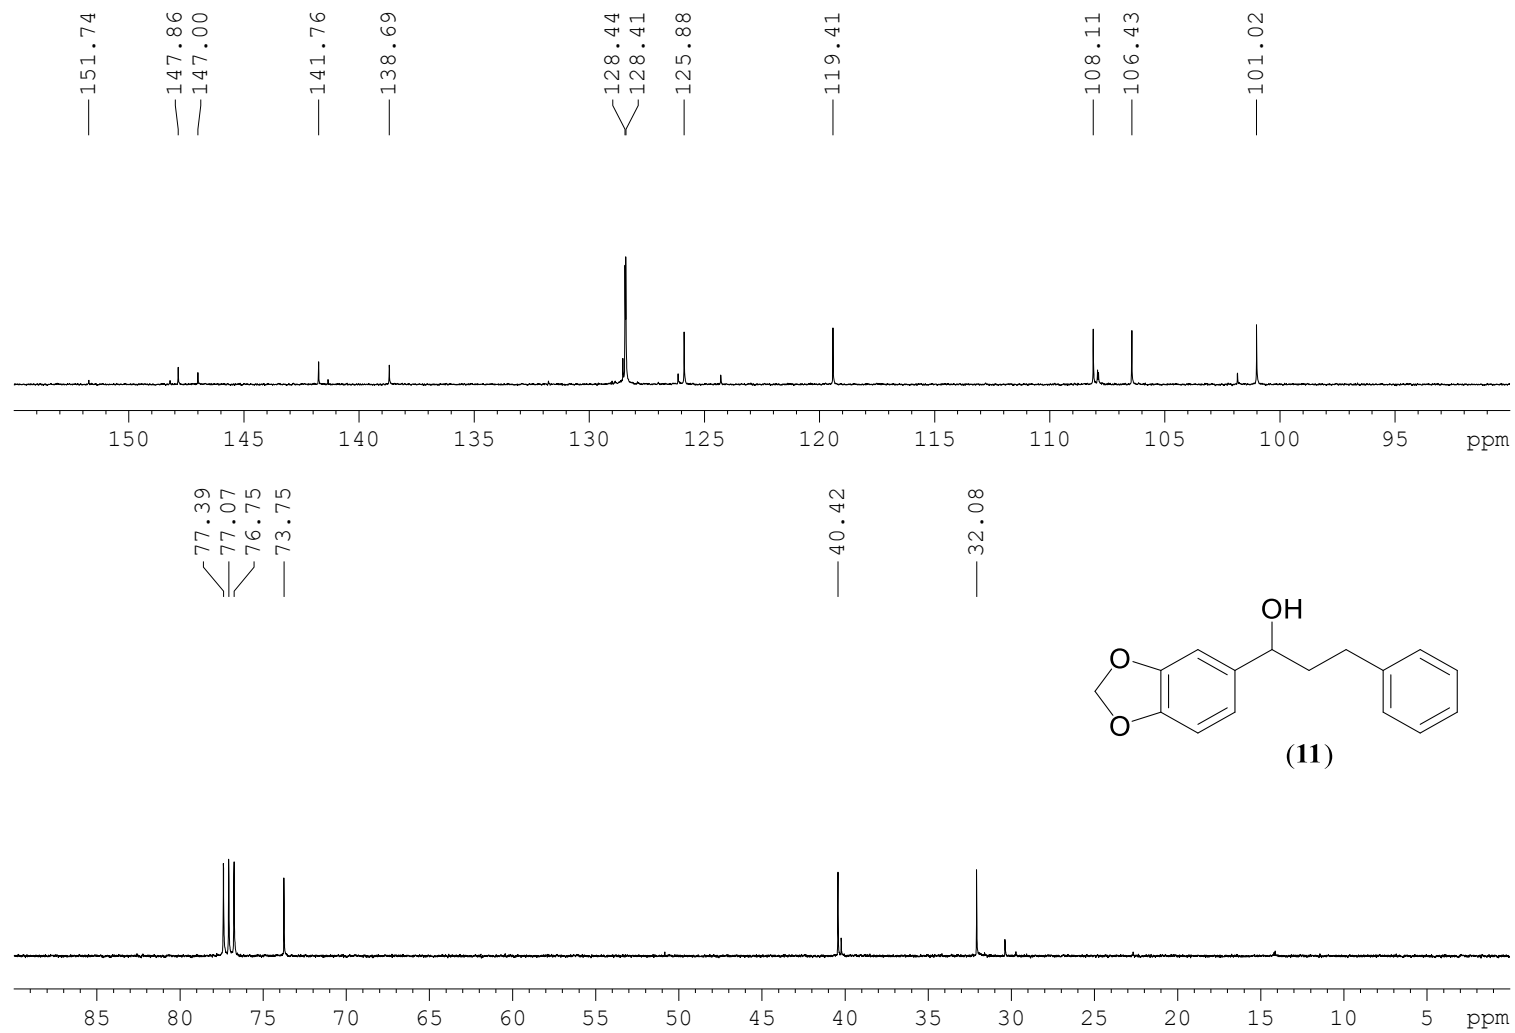

**Figure S82.** Expanded  $^{13}\text{C}\{^1\text{H}\}$  NMR spectrum of (11) in  $\text{CDCl}_3$ .



File : F:\GCMS-DATA-2021\NOV2021\PG-ST-02-195-08.D  
Operator : AM  
Acquired : 13 Nov 2021 11:59 using AcqMethod COMMONMETHOD-2010.M  
Instrument : GCMS  
Sample Name: PG-ST-02-195-08  
Misc Info :  
Vial Number: 2

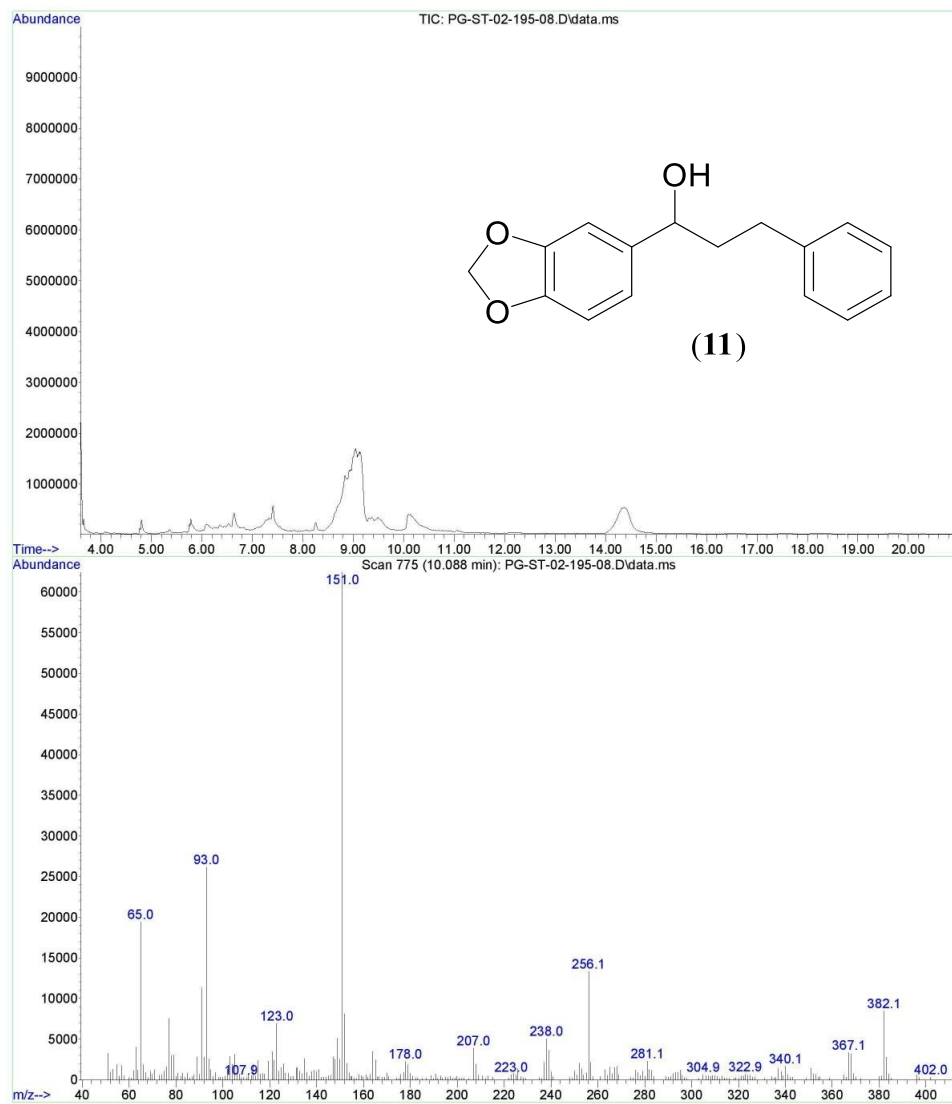

**Figure S83.** GCMS trace in EtOAc of (11) showing the  $M^+$  peak at  $m/z$  256.

SP18022016  
varioMICRO CHNS  
serial number: 15154051

Graphic report

| No. | Weight [mg] | Name              | Method     | N Area | C Area | H Area | N [%] | C [%] | H [%] | Date       | Time  | Info |
|-----|-------------|-------------------|------------|--------|--------|--------|-------|-------|-------|------------|-------|------|
| 58  | 0.9630      | PG-ST-02-180-06-1 | 2mgChem80s | 2 874  | 20 333 | 5 715  | 0.00  | 75.84 | 5.383 | 16-11-2021 | 20:57 | Su   |

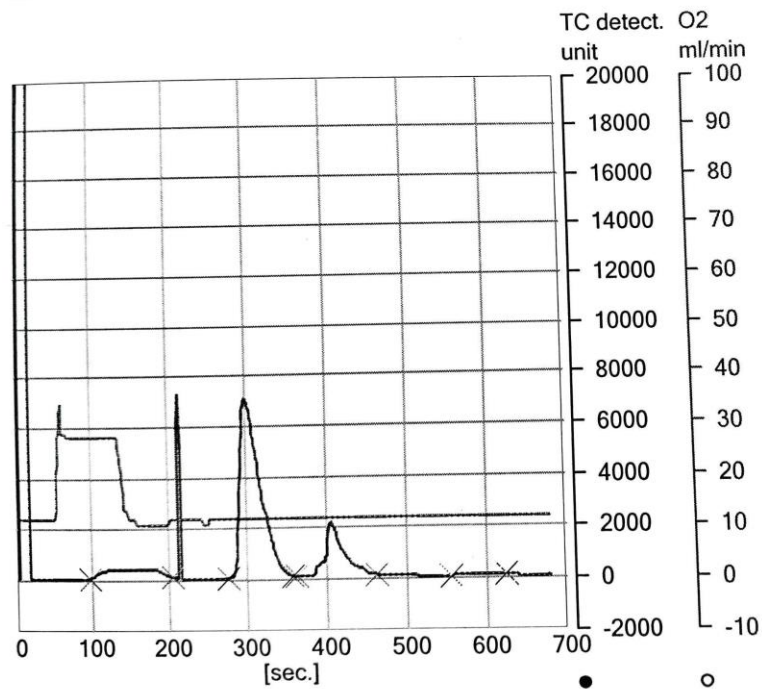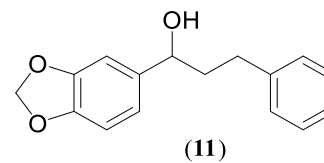

Figure S84. Elemental analysis data of (11).

PG-ST-02-181-08-1H

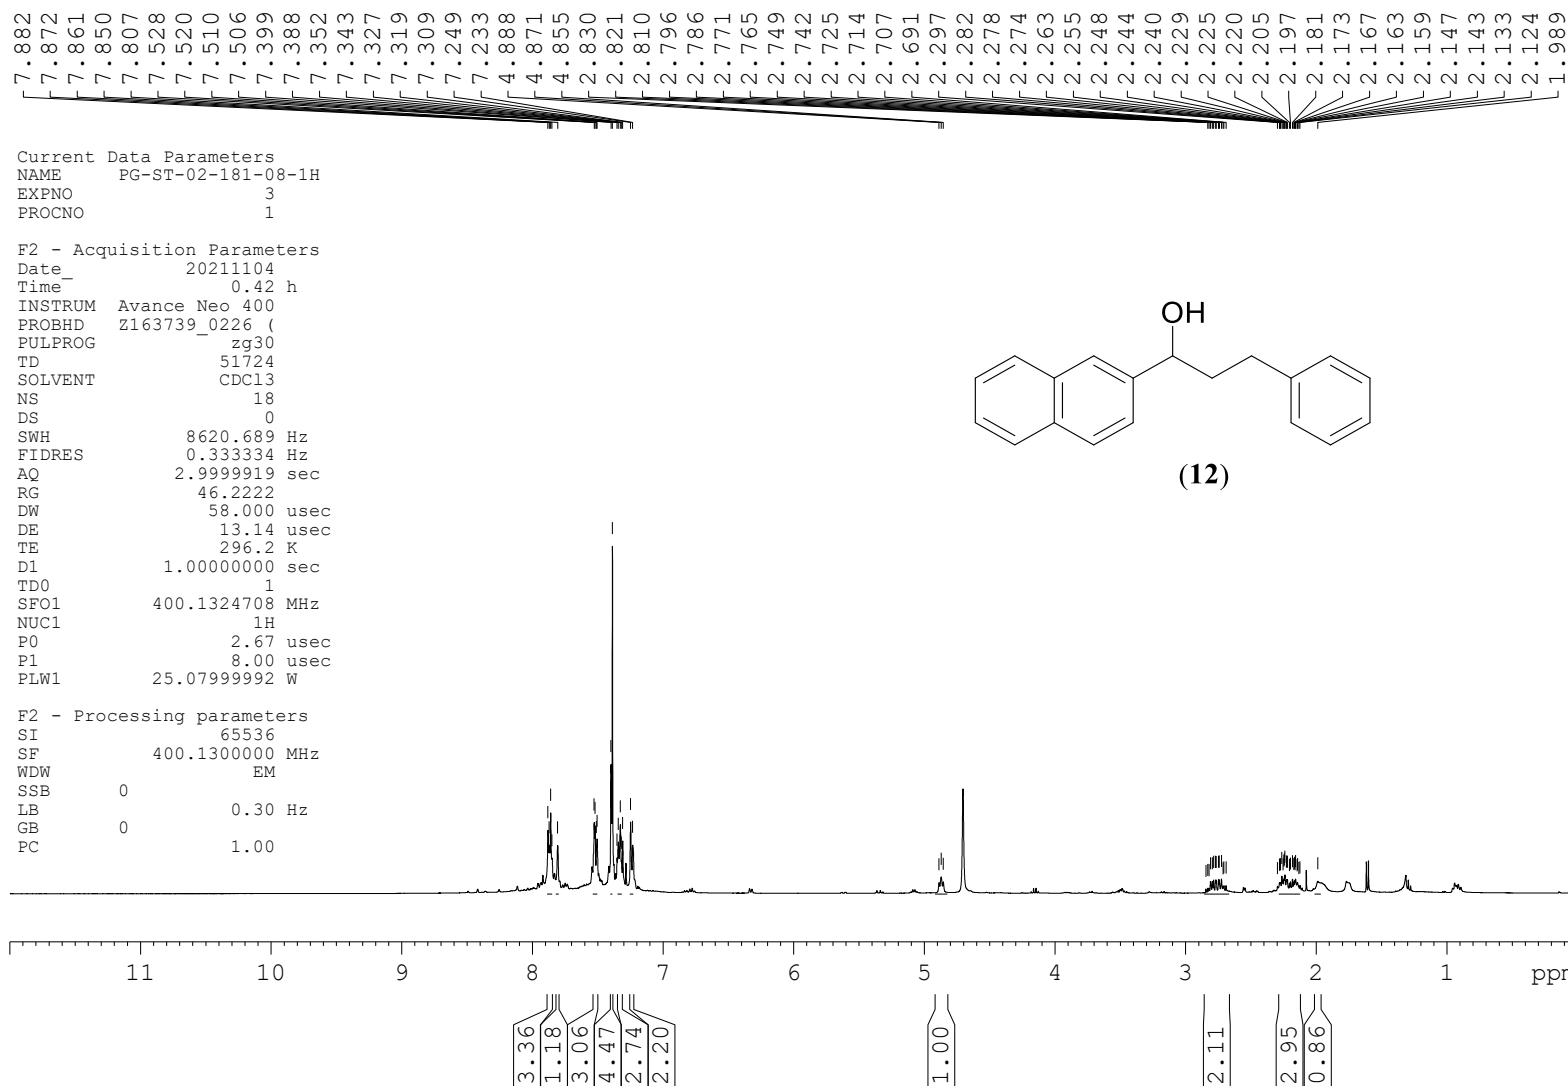

Figure S85. <sup>1</sup>H NMR spectrum of (12) in CDCl<sub>3</sub>.

PG-ST-02-181-08-1H

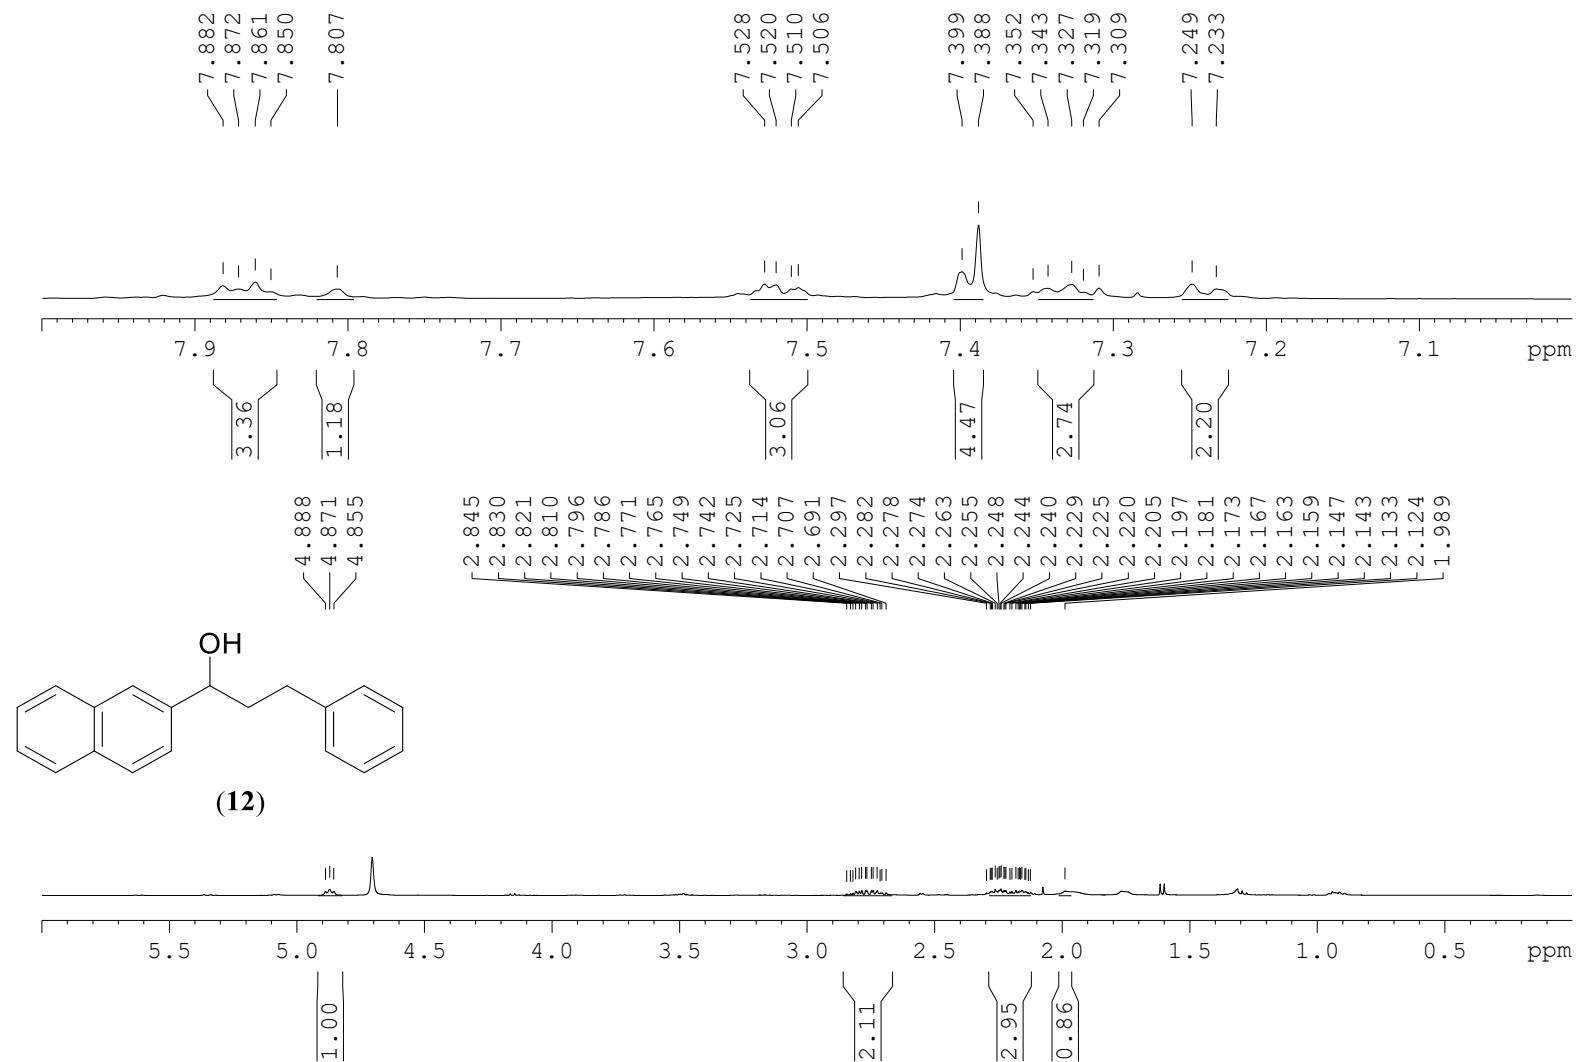

**Figure S86.** Expanded  $^1\text{H}$  NMR spectrum of (12) in  $\text{CDCl}_3$ .

PG-ST-02-181-08-13C

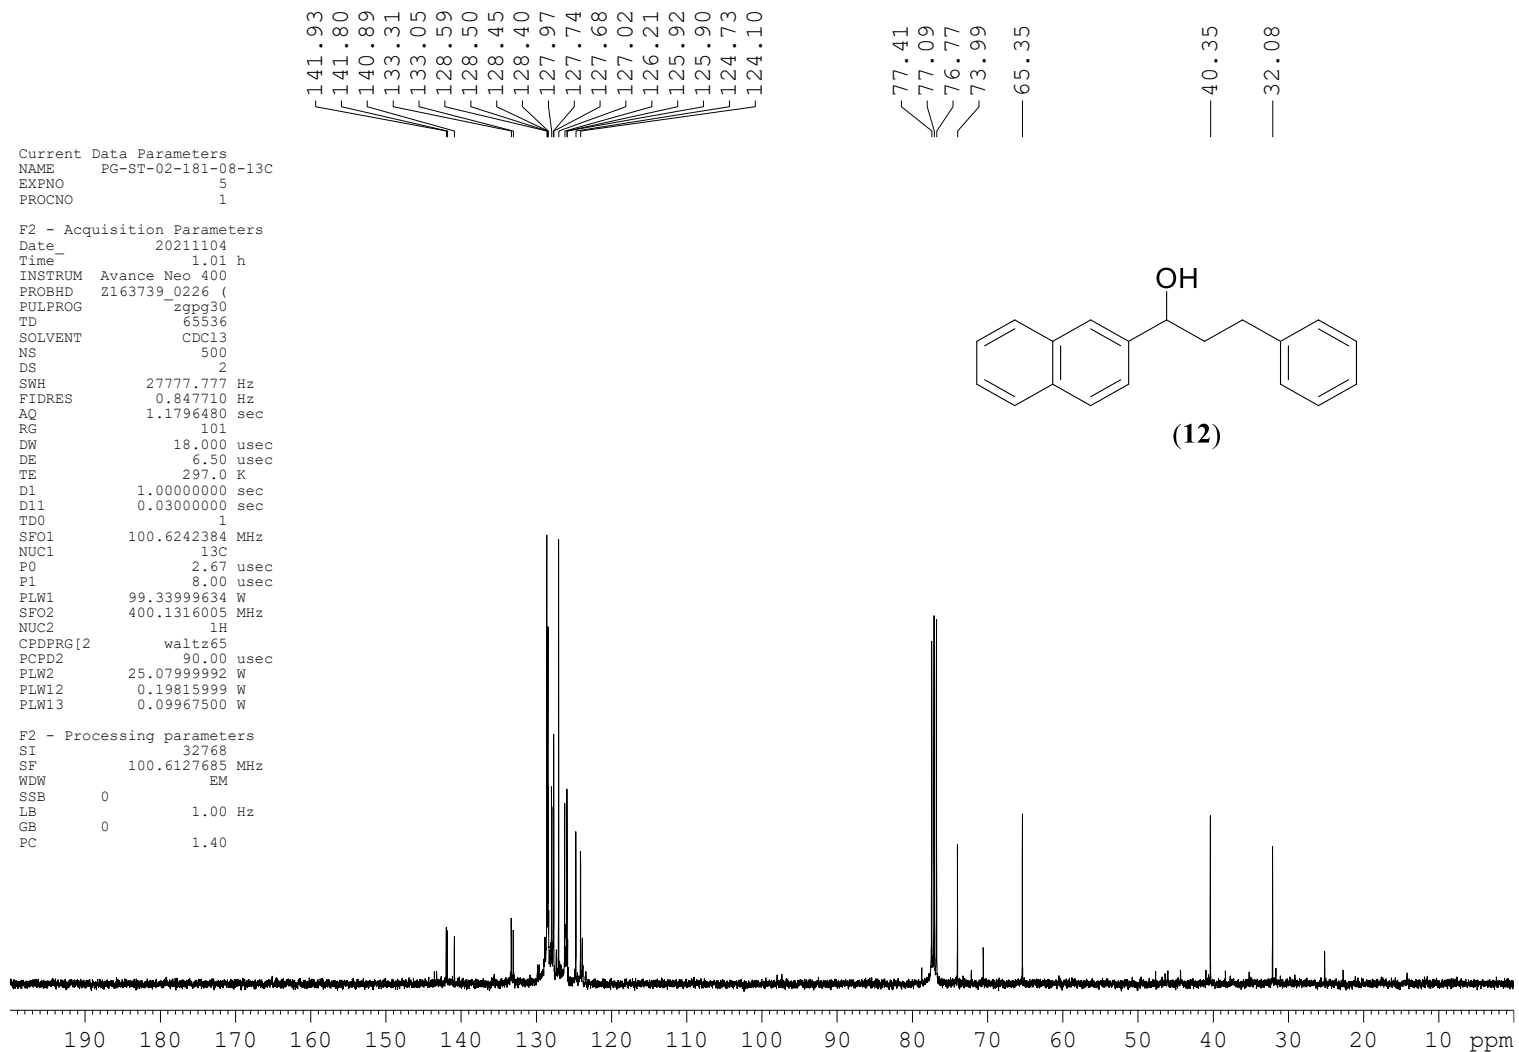

Figure S87.  $^{13}\text{C}\{^1\text{H}\}$  NMR spectrum of (12) in  $\text{CDCl}_3$ .

PG-ST-02-181-08-13C

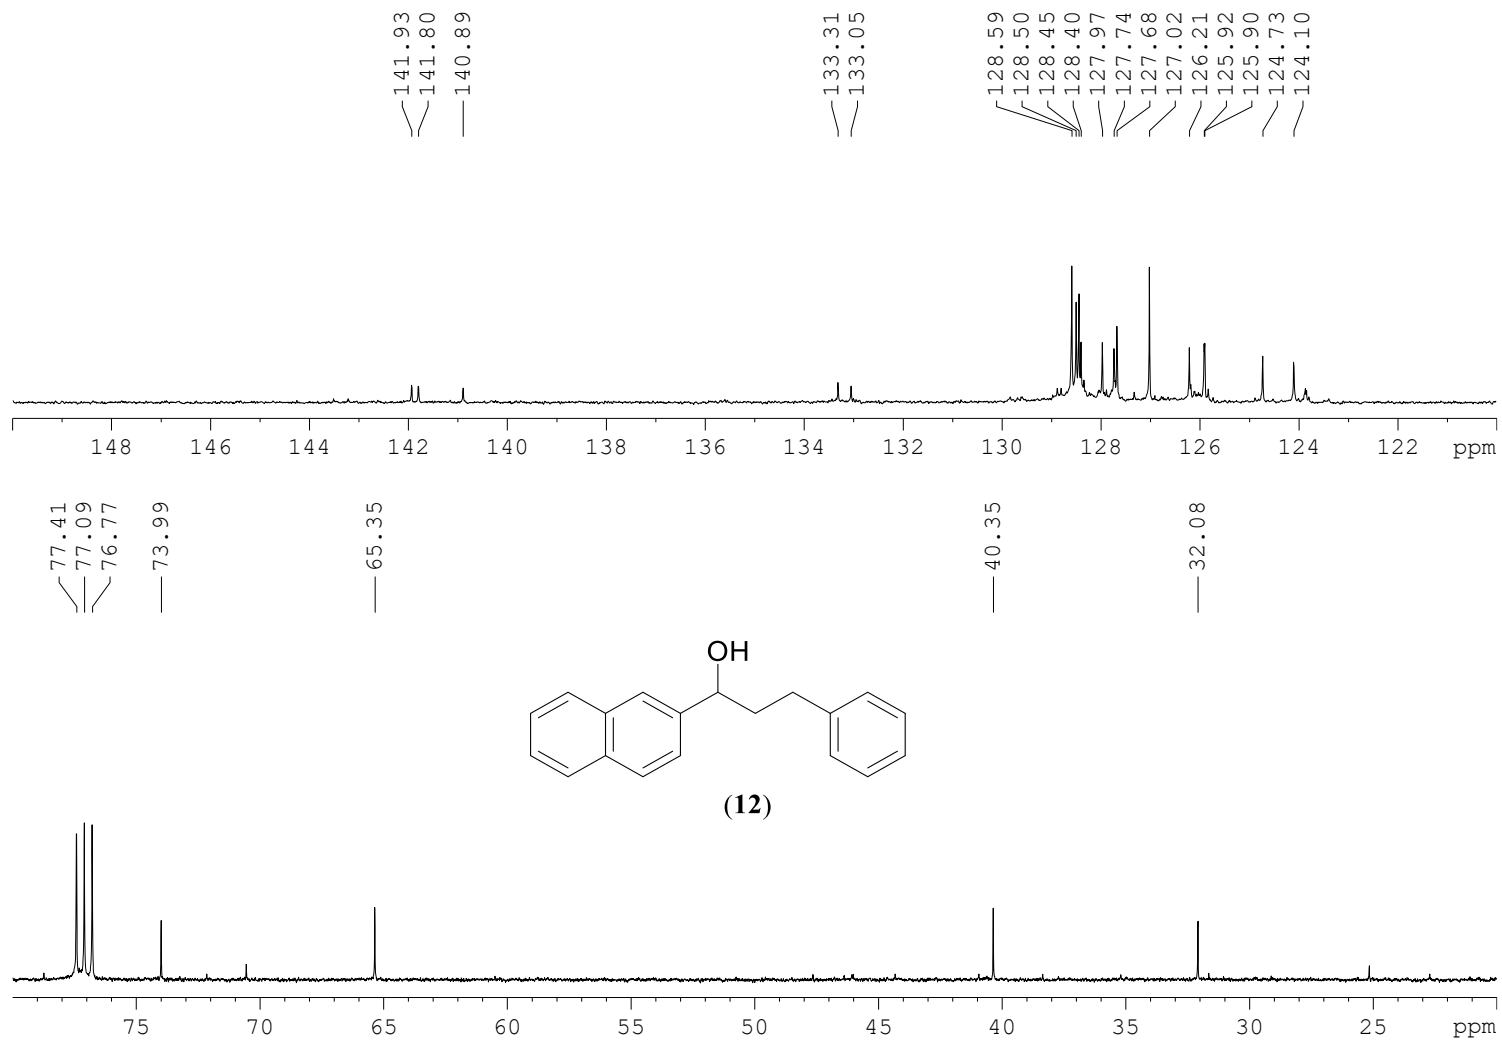

**Figure S88.** Expanded  $^{13}\text{C}\{^1\text{H}\}$  NMR spectrum of (12) in  $\text{CDCl}_3$ .

File : F:\GCMS-DATA-2021\NOV2021\PG-ST-02-181-08-11.D  
Operator : RM  
Acquired : 19 Nov 2021 15:26 using AcqMethod COMMONMETHOD-2010.M  
Instrument : GCMS  
Sample Name: PG-ST-02-181-08-11  
Misc Info :  
Vial Number: 1

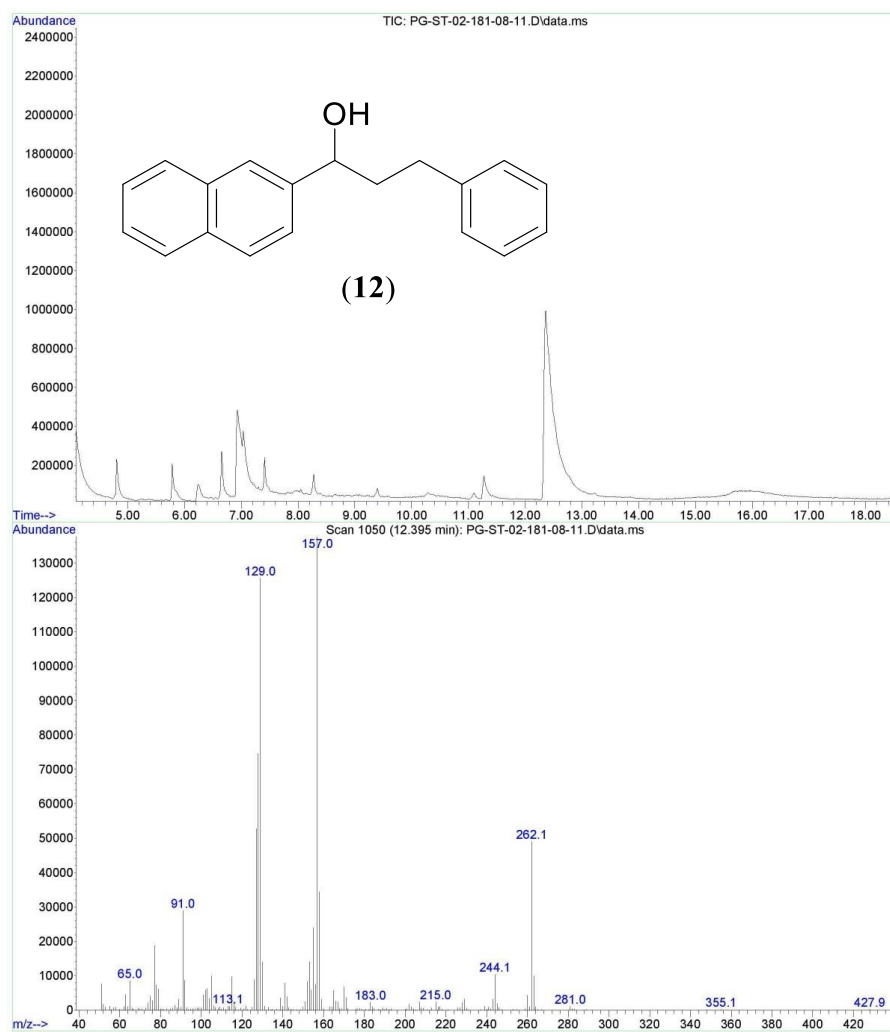

**Figure S89.** GCMS trace in EtOAc of (12) showing the  $M^+$  peak at  $m/z$  262.

Document: CHNS01022022 (varioMICRO) from: --- (modified)

SP18022016  
varioMICRO CHNS  
serial number: 15154051

Graphic report

| No. | Weight [mg] | Name           | Method     | N Area | C Area | H Area | N [%] | C [%] | H [%] | Date       | Time  | Info |
|-----|-------------|----------------|------------|--------|--------|--------|-------|-------|-------|------------|-------|------|
| 33  | 1.7210      | PG-ST-02-196-1 | 2mgChem80s | 2 834  | 41 889 | 11 567 | 0.00  | 87.33 | 7.023 | 01-02-2022 | 18:59 |      |

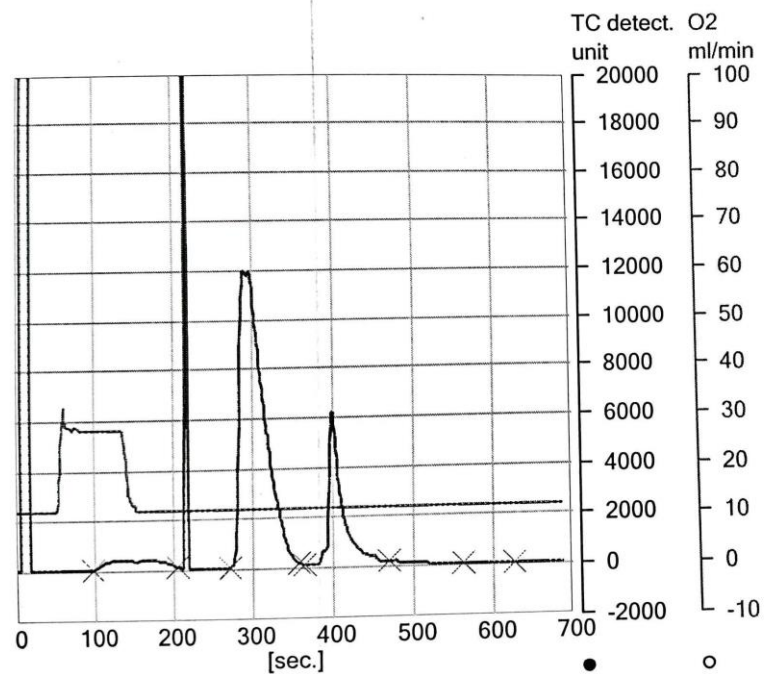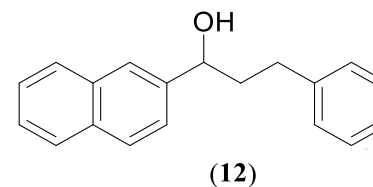

Figure S90. Elemental analysis data of (12).



PG-ST-02-183-03-1H

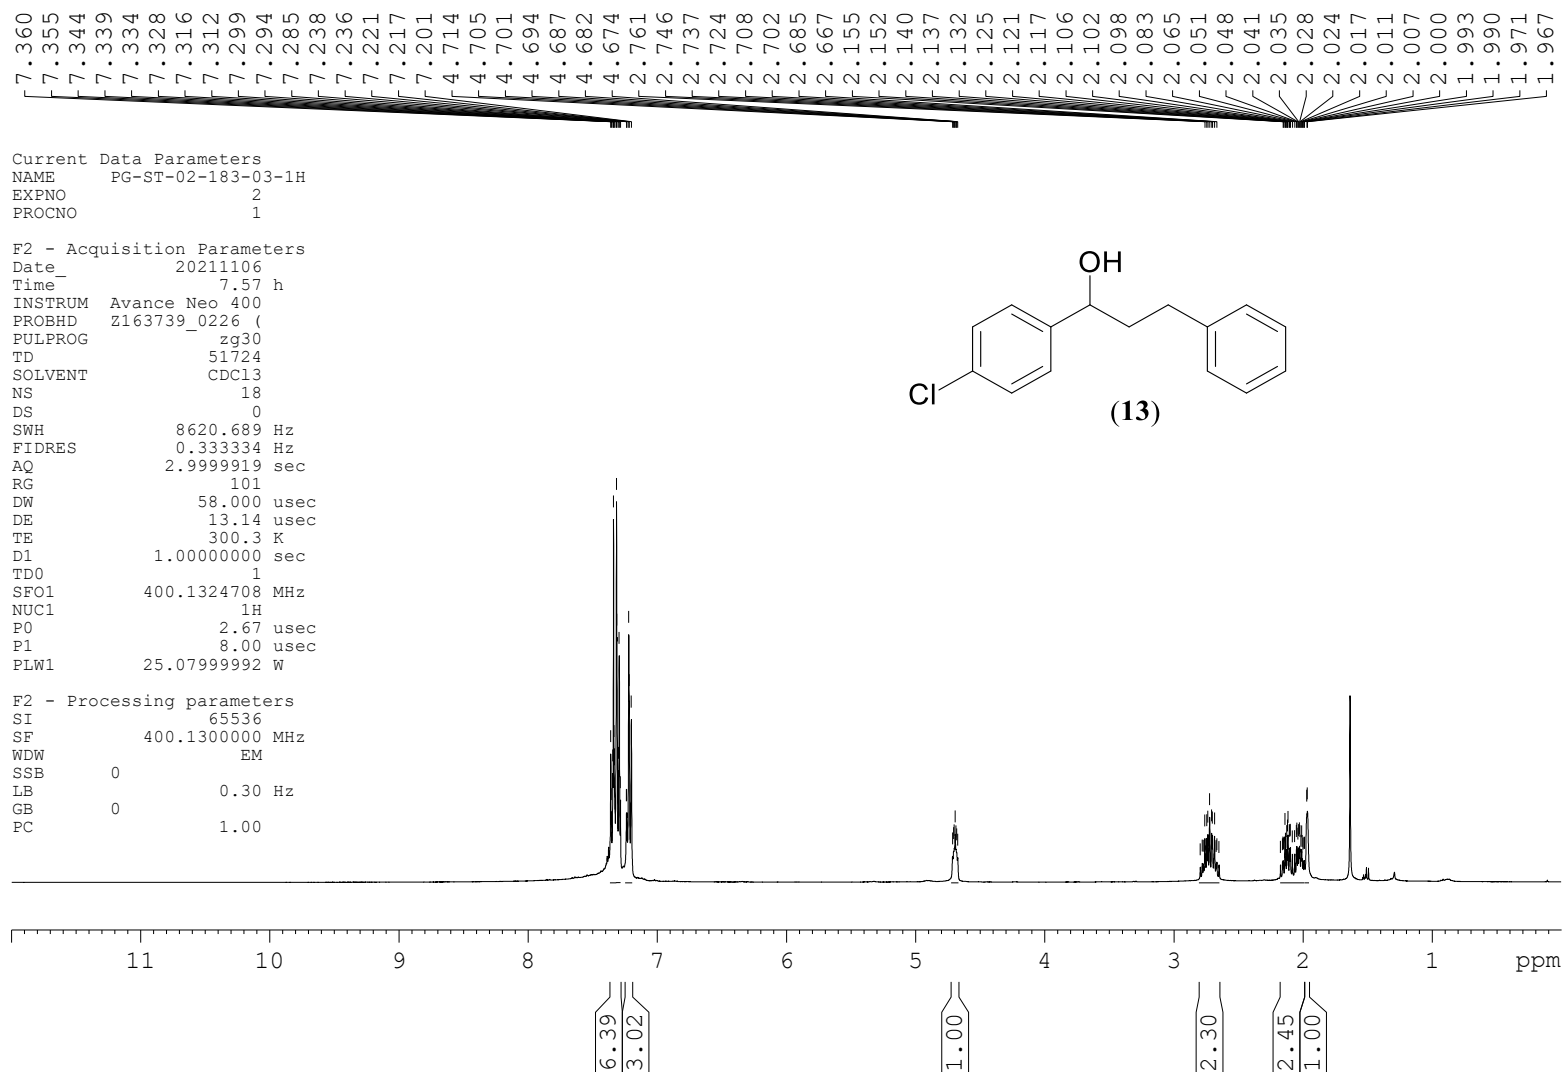

Figure S91. <sup>1</sup>H NMR spectrum of (13) in CDCl<sub>3</sub>.

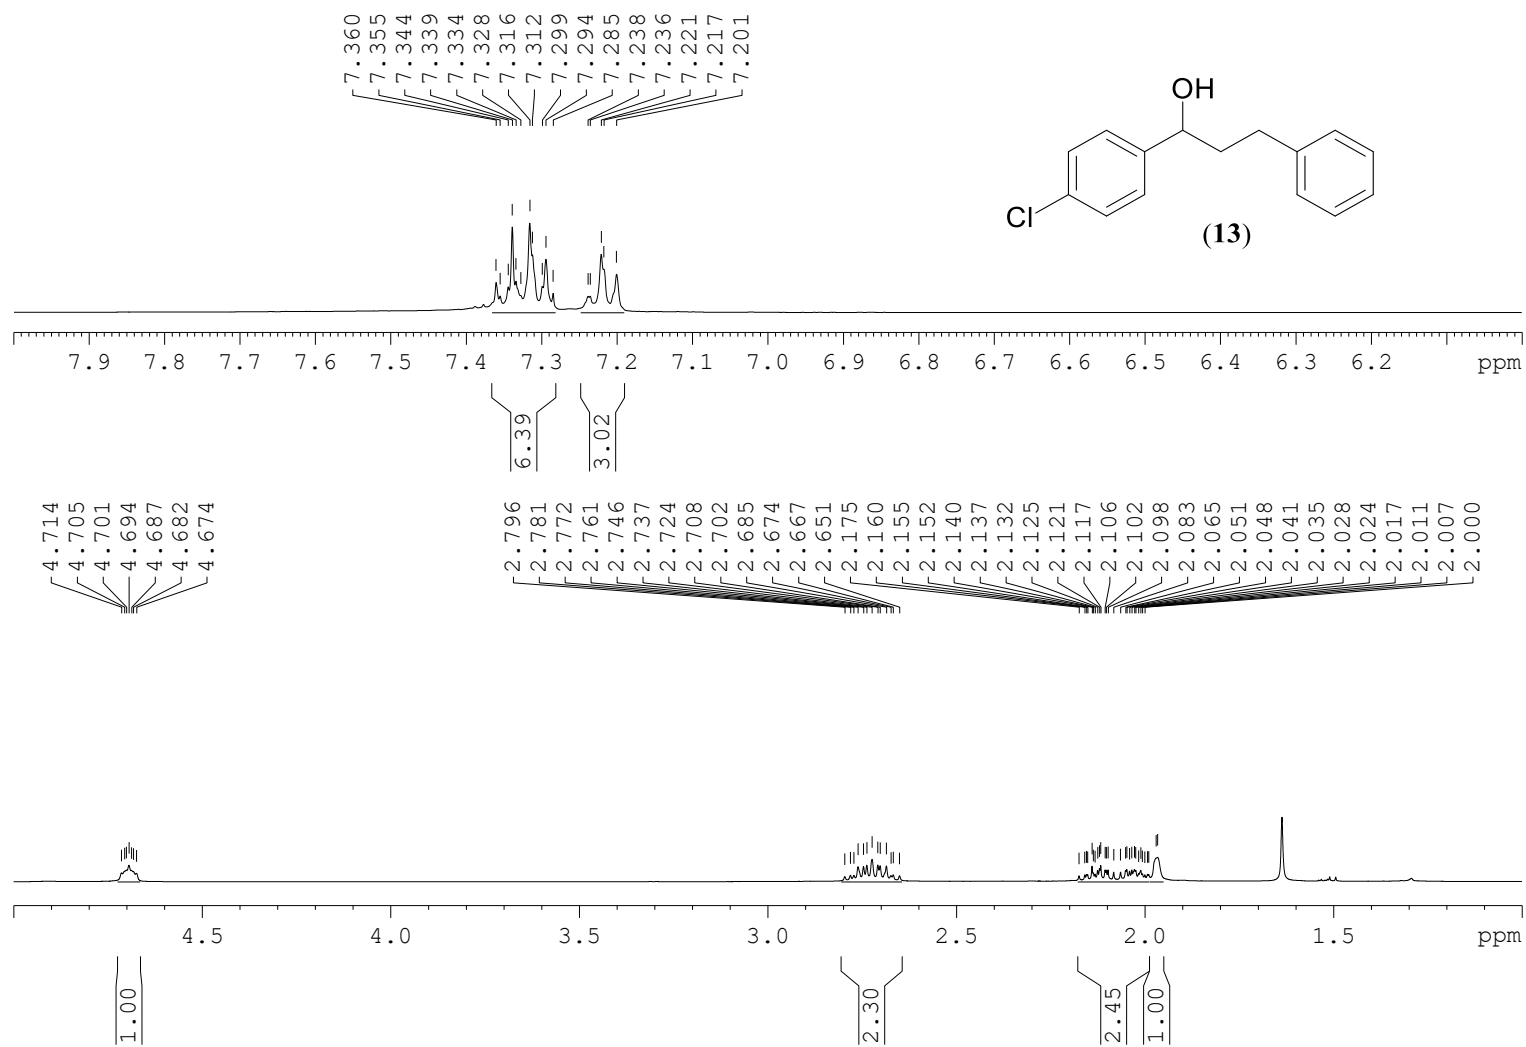

**Figure S92.** Expanded  $^1\text{H}$  NMR spectrum of (13) in  $\text{CDCl}_3$ .

PG-ST-02-183-03-13C

Current Data Parameters  
NAME PG-ST-02-183-03-13C  
EXPNO 13  
PROCNO 1

F2 - Acquisition Parameters  
Date\_ 20211107  
Time\_ 22.03 h  
INSTRUM Avance Neo 400  
PROBHD Z163739\_0226 (  
PULPROG zgpg30  
TD 65536  
SOLVENT CDCl3  
NS 1024  
DS 2  
SWH 27777.777 Hz  
FIDRES 0.847710 Hz  
AQ 1.1796480 sec  
RG 101  
DW 18.000 usec  
DE 6.50 usec  
TE 300.7 K  
D1 1.00000000 sec  
D11 0.03000000 sec  
TD0 1  
SFO1 100.6242384 MHz  
NUC1 13C  
P0 2.67 usec  
P1 8.00 usec  
PLW1 99.33999634 W  
SFO2 400.1316005 MHz  
NUC2 1H  
CPDPRG[2] waltz65  
PCPD2 90.00 usec  
PLW2 25.07999992 W  
PLW12 0.19815999 W  
PLW13 0.09967500 W

F2 - Processing parameters  
SI 32768  
SF 100.6127685 MHz  
WDW EM  
SSB 0  
LB 1.00 Hz  
GB 0  
PC 1.40

143.04  
141.50  
133.27  
128.65  
128.46  
128.42  
127.31  
125.98

77.34  
77.02  
76.70  
73.17

40.51  
31.93

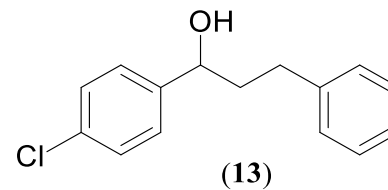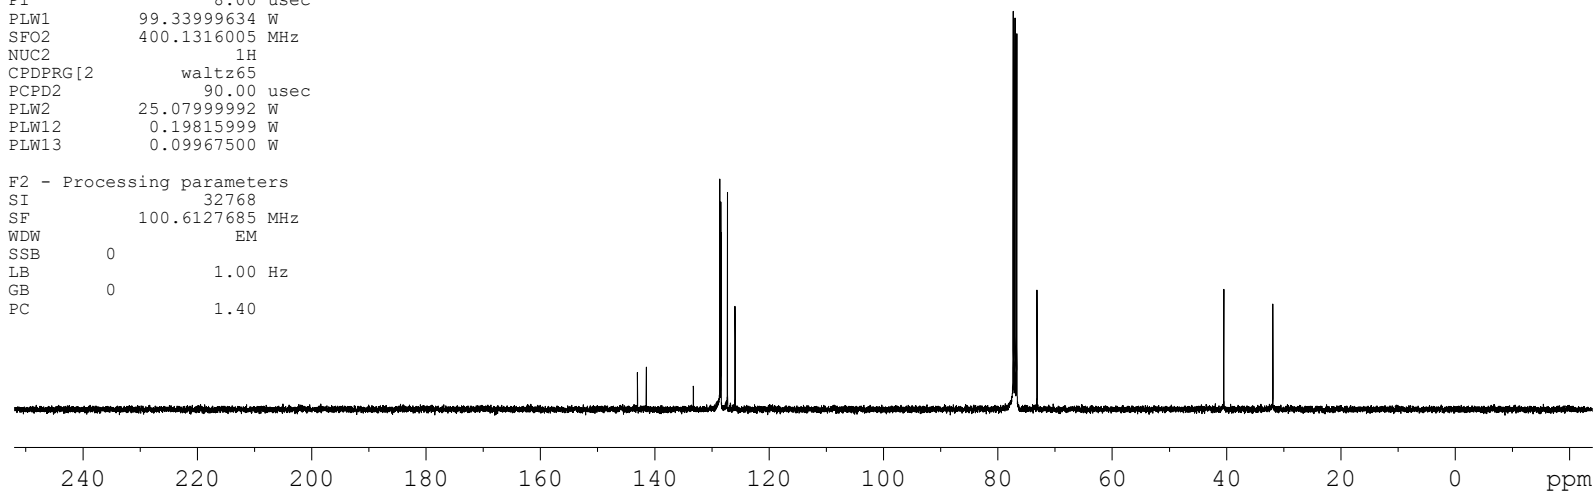

Figure S93.  $^{13}\text{C}\{^1\text{H}\}$  NMR spectrum of (13) in  $\text{CDCl}_3$ .

PG-ST-02-183-03-13C

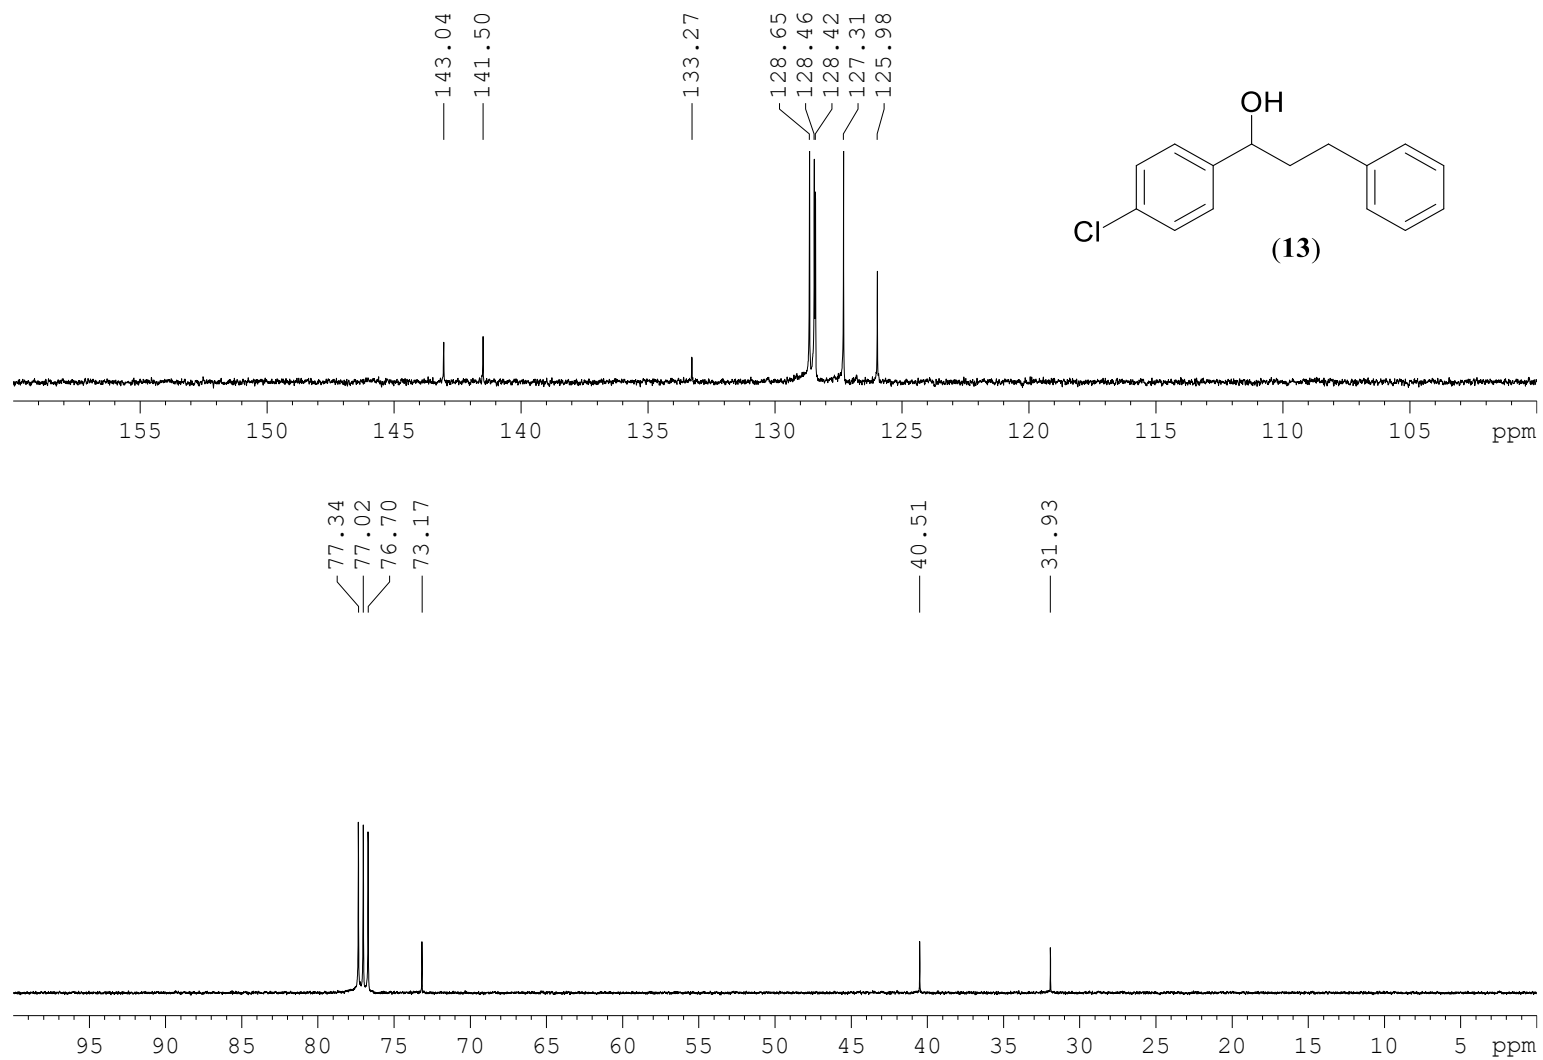

**Figure S94.** Expanded  $^{13}\text{C}\{^1\text{H}\}$  NMR spectrum of (13) in  $\text{CDCl}_3$ .

File : F:\GCMS-DATA-2021\NOV 2021\PG-ST-02-183-03.D  
Operator : AM  
Acquired : 7 Nov 2021 12:27 using AcqMethod COMMONMETHOD-2020.M  
Instrument : GCMS  
Sample Name: PG-ST-02-183-03  
Misc Info :  
Vial Number: 1

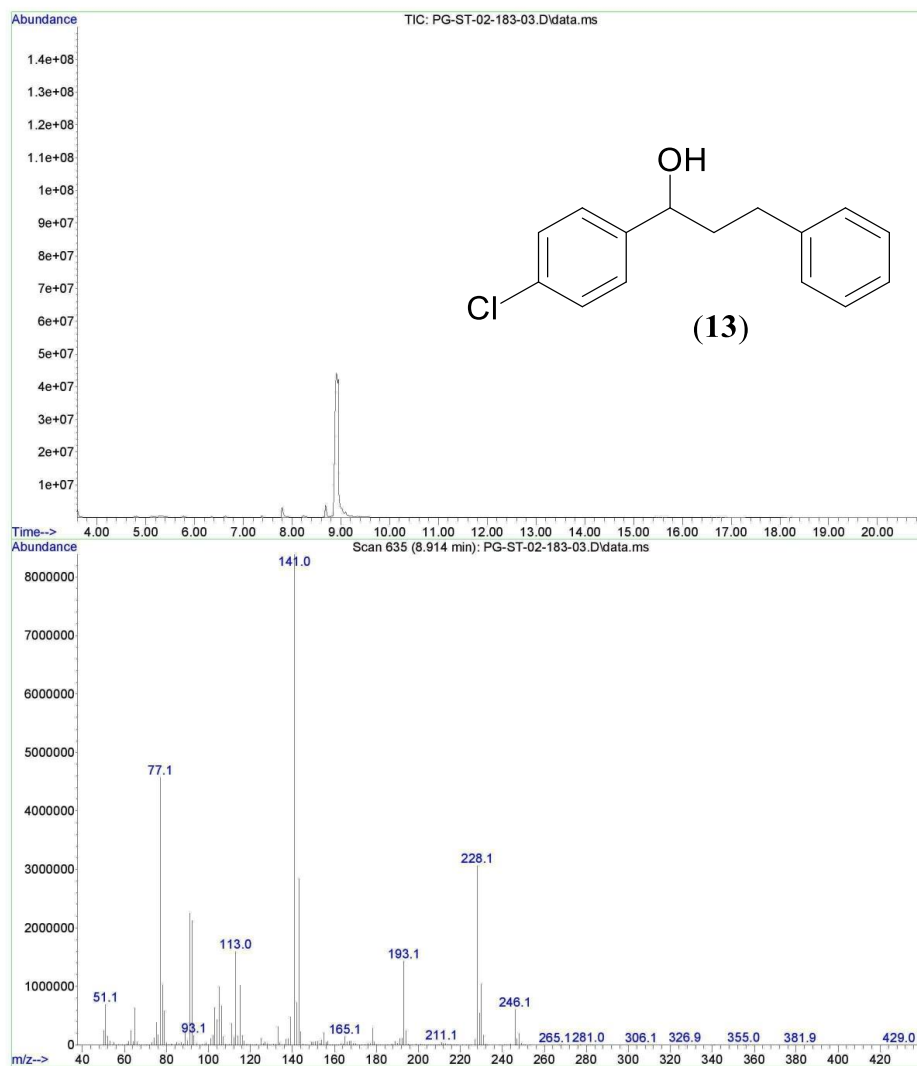

**Figure S95.** GCMS trace in EtOAc of (13) showing the  $M^+$  peak at  $m/z$  246.

Document: CHNS11112021 (varioMICRO) from: 12-11-2021 10:04:06

SP18022016  
varioMICRO CHNS  
serial number: 15154051

Graphic report

| No. | Weight [mg] | Name           | Method     | N Area | C Area | H Area | N [%] | C [%] | H [%] | Date       | Time  | Info |
|-----|-------------|----------------|------------|--------|--------|--------|-------|-------|-------|------------|-------|------|
| 55  | 1.3410      | PG-ST-02-183-1 | 2mgChem80s | 2 909  | 27 755 | 7 361  | 0.00  | 72.64 | 5.398 | 11-11-2021 | 20:30 |      |

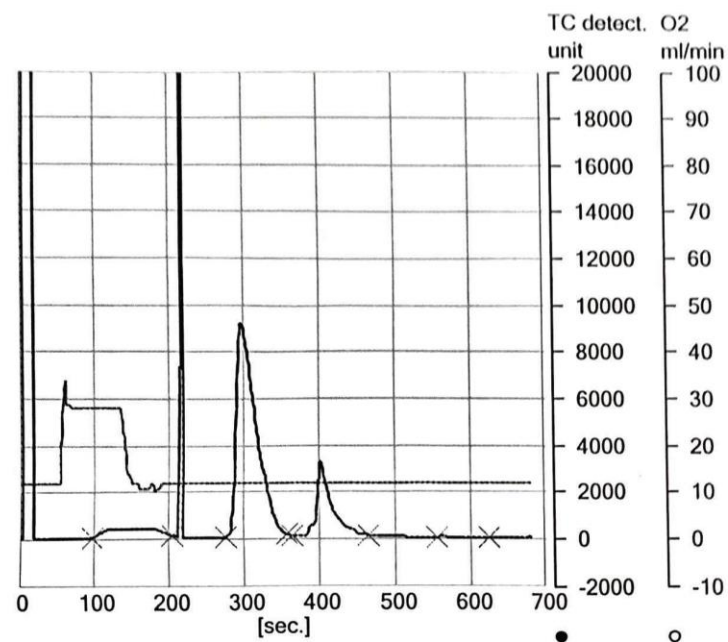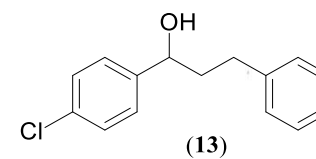

Figure S96. Elemental analysis data of (13).

PG-ST-03-171-01-1H-1

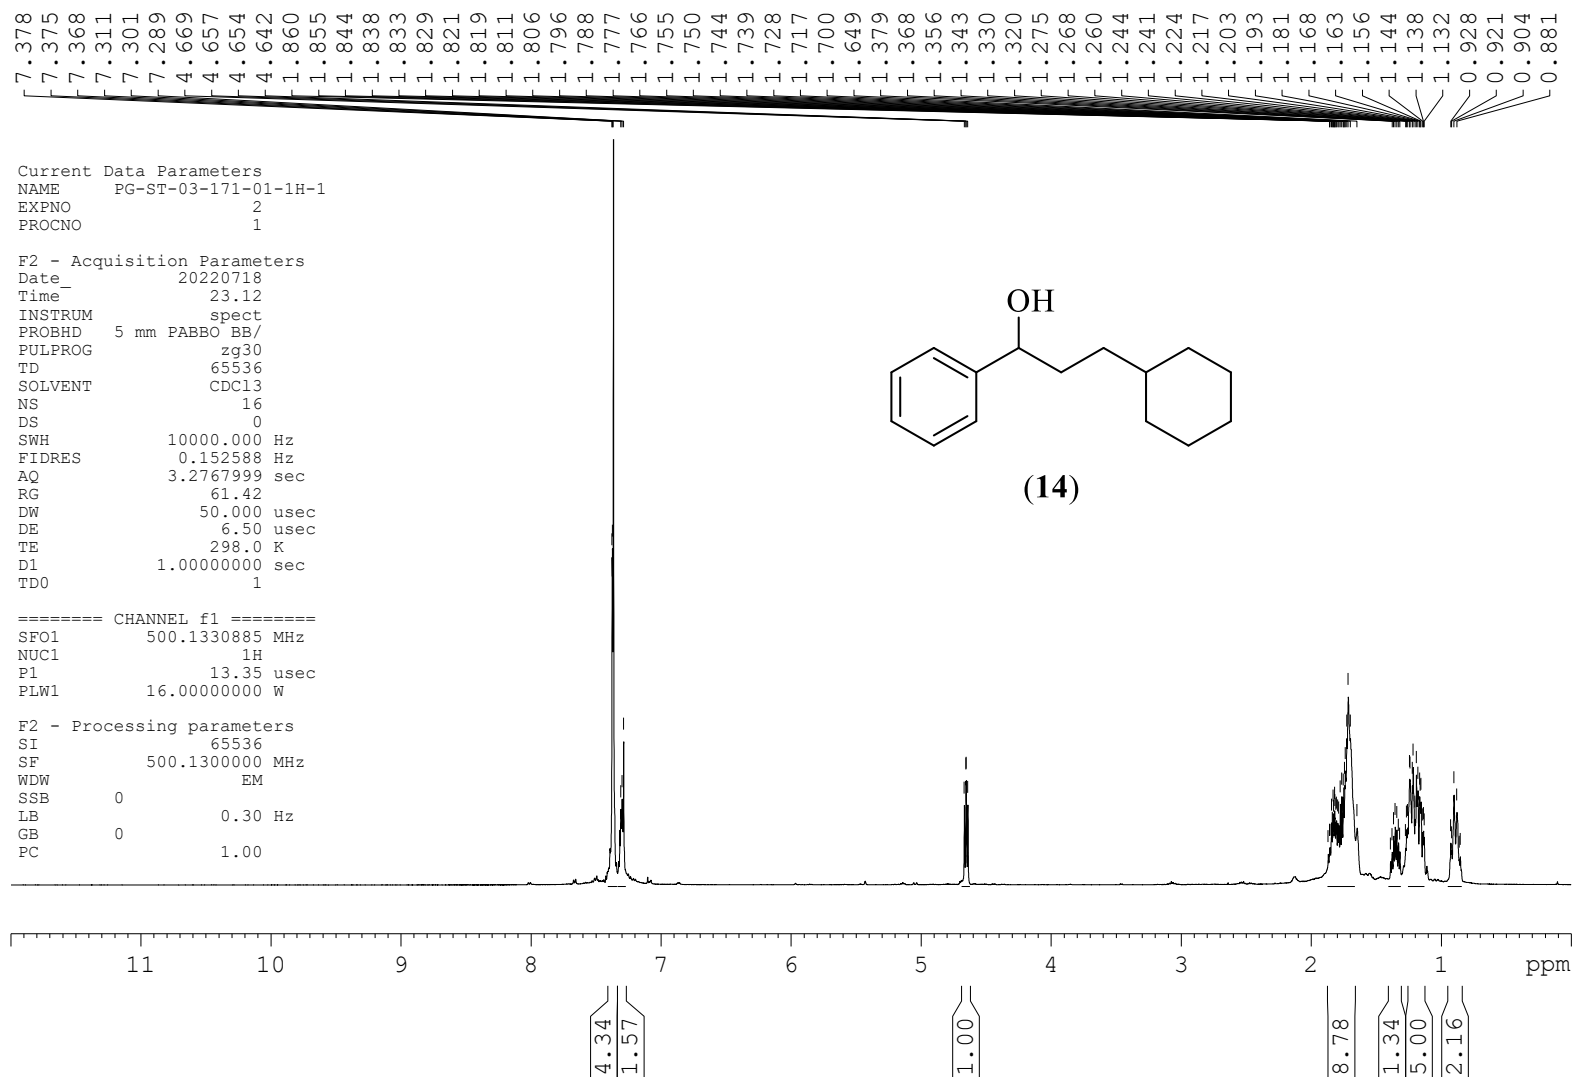

Figure S97.  $^1\text{H}$  NMR spectrum of (14) in  $\text{CDCl}_3$ .

PG-ST-03-171-01-1H-1

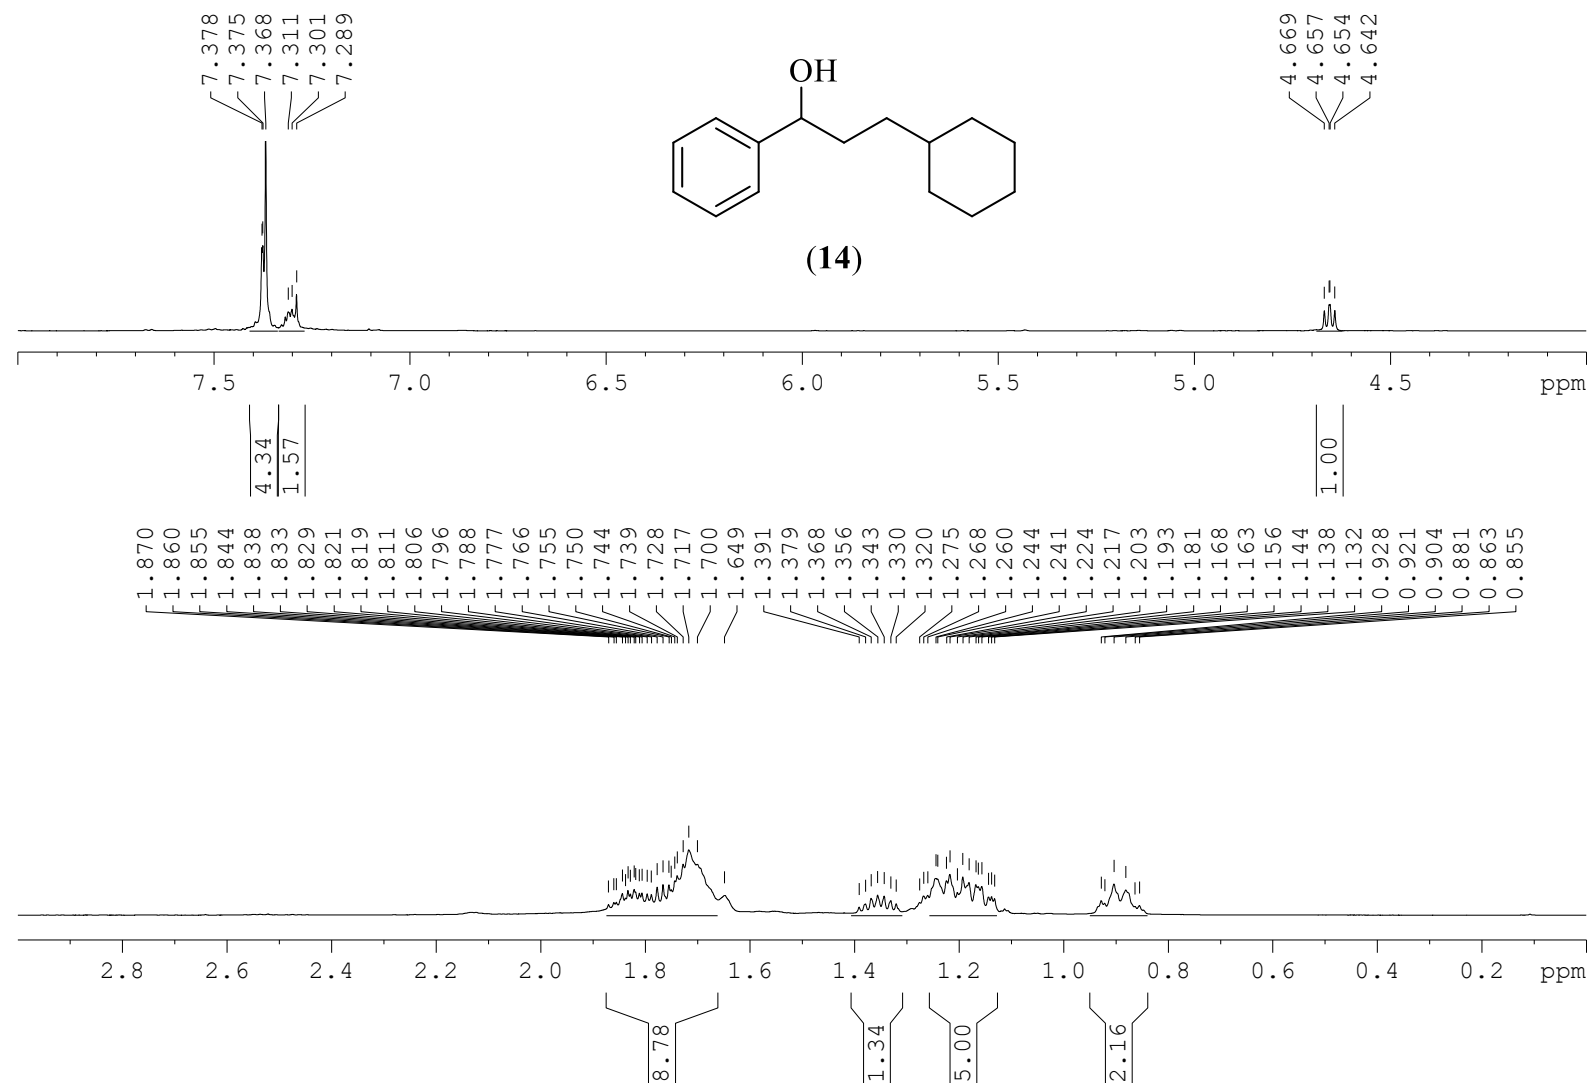

Figure S98. Expanded  $^1\text{H}$  NMR spectrum of (14) in  $\text{CDCl}_3$ .



PG-ST-03-171-01-13C-1

Current Data Parameters  
NAME PG-ST-03-171-01-13C-1  
EXPNO 4  
PROCNO 1

F2 - Acquisition Parameters  
Date\_ 20220718  
Time 23.15  
INSTRUM spect  
PROBHD 5 mm PABBO BB/  
PULPROG zgpg30  
TD 65536  
SOLVENT CDCl3  
NS 323  
DS 0  
SWH 29761.904 Hz  
FIDRES 0.454131 Hz  
AQ 1.1010048 sec  
RG 197.27  
DW 16.800 usec  
DE 6.50 usec  
TE 298.1 K  
D1 2.00000000 sec  
D11 0.03000000 sec  
TDO 1

=====  
CHANNEL f1  
SFO1 125.7703637 MHz  
NUC1 13C  
P1 8.90 usec  
PLW1 103.00000000 W

=====  
CHANNEL f2  
SFO2 500.1320005 MHz  
NUC2 1H  
CPDPRG[2] waltz16  
PCPD2 80.00 usec  
PLW2 16.00000000 W  
PLW12 0.44556001 W  
PLW13 0.22411001 W

F2 - Processing parameters  
SI 32768  
SF 125.7577890 MHz  
WDW EM  
SSB 0  
LB 1.00 Hz  
GB 0  
PC 1.40

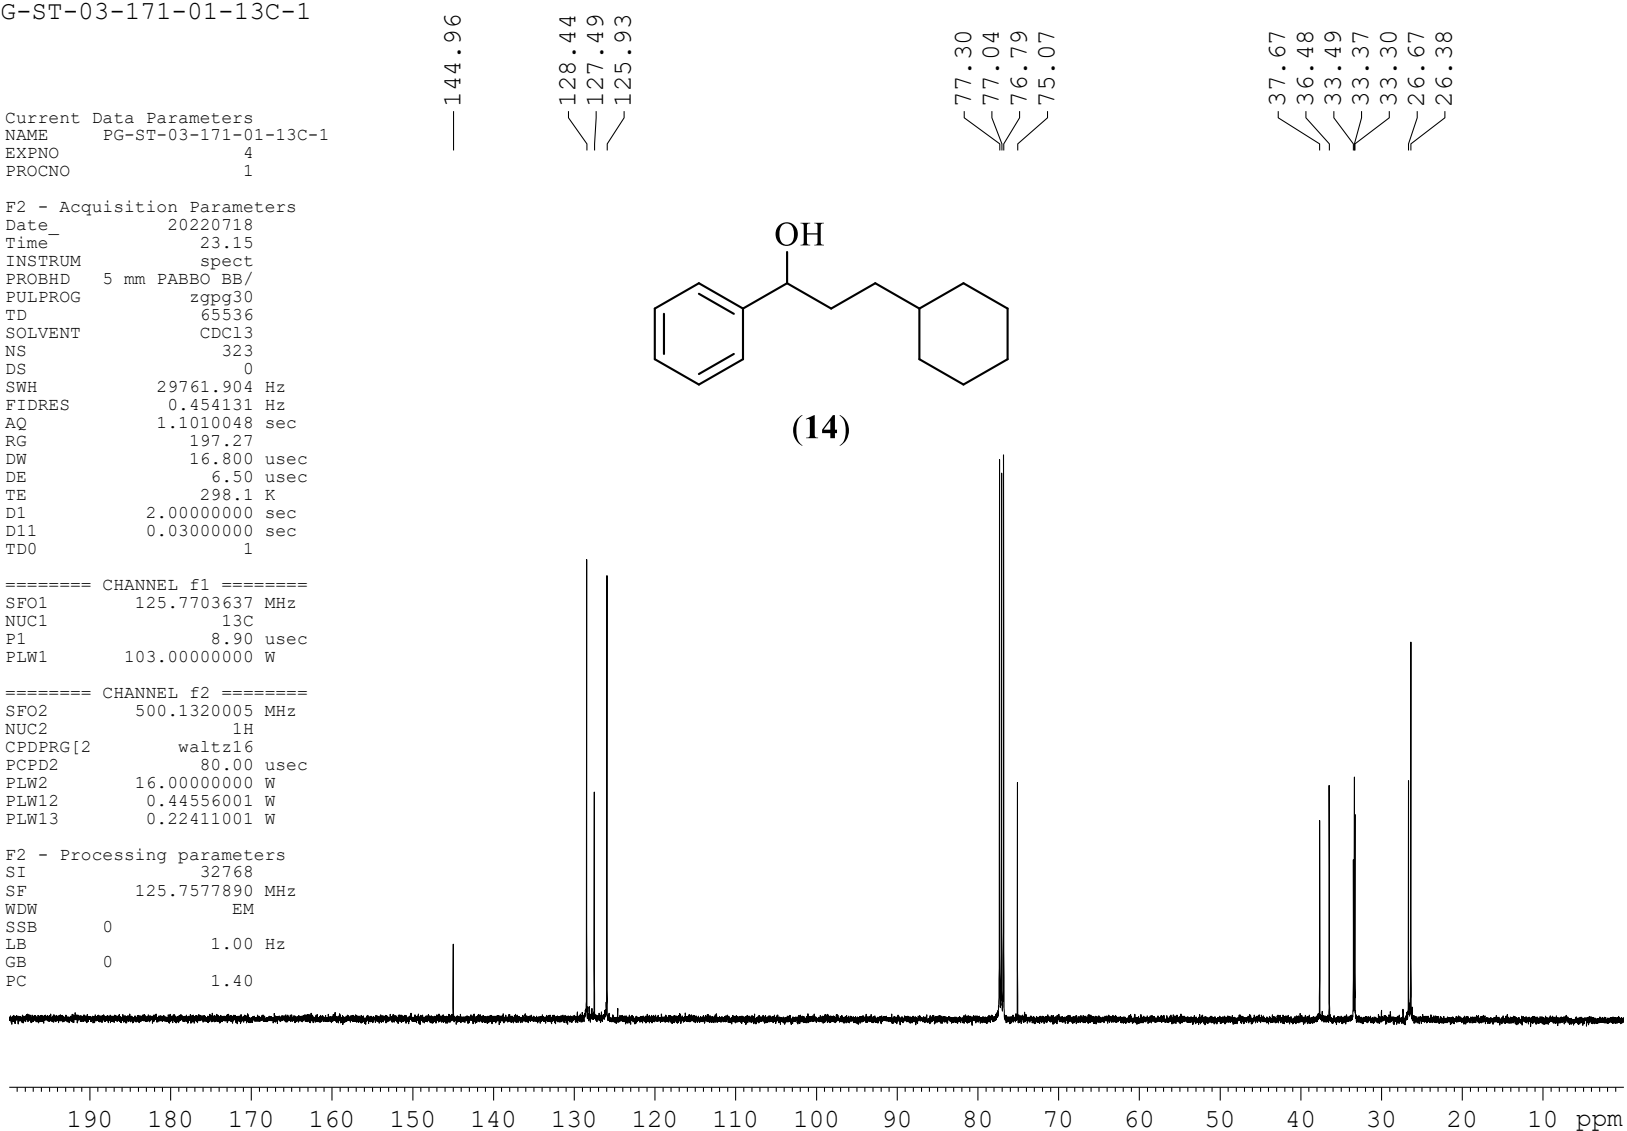

Figure S99.  $^{13}\text{C}\{^1\text{H}\}$  NMR spectrum of (14) in  $\text{CDCl}_3$ .

PG-ST-03-171-01-13C-1

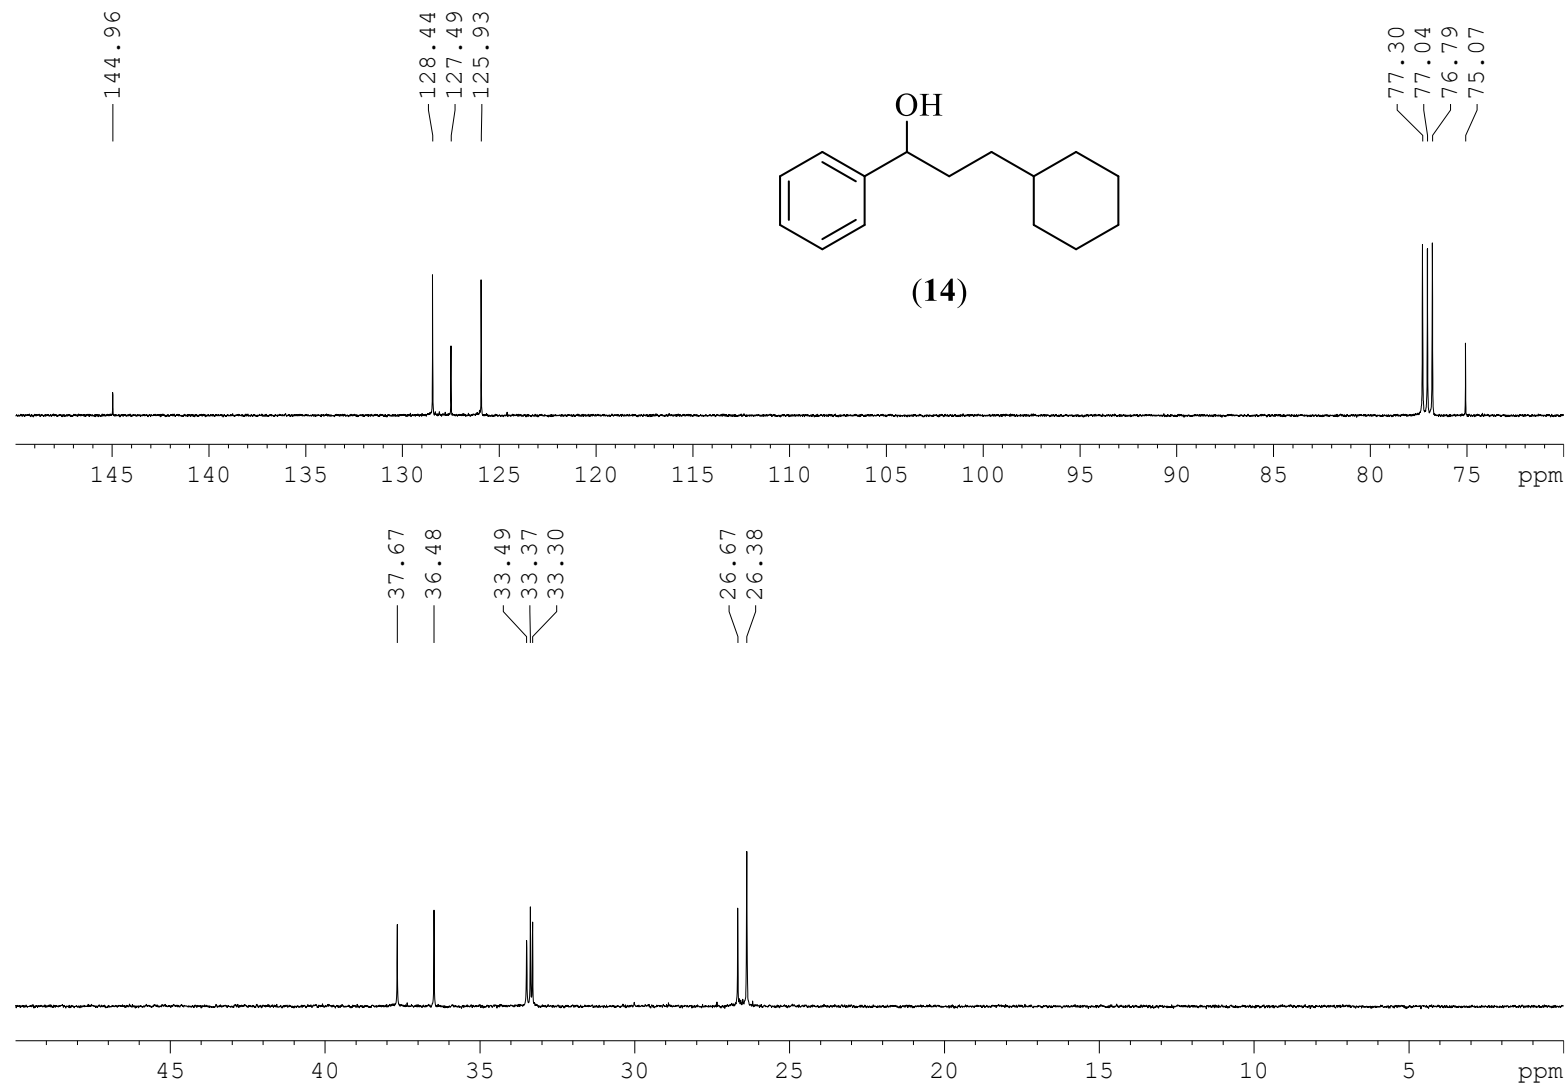

**Figure S100.** Expanded  $^{13}\text{C}\{^1\text{H}\}$  NMR spectrum of (14) in  $\text{CDCl}_3$ .

File :F:\GCMS-DATA-2022\july 2022\PG-ST-03-171.D  
Operator : HR  
Acquired : 19 Jul 2022 11:38 using AcqMethod NEWMETHOD-2022.M  
Instrument : GCMS  
Sample Name: PG-ST-03-171  
Misc Info :  
Vial Number: 5

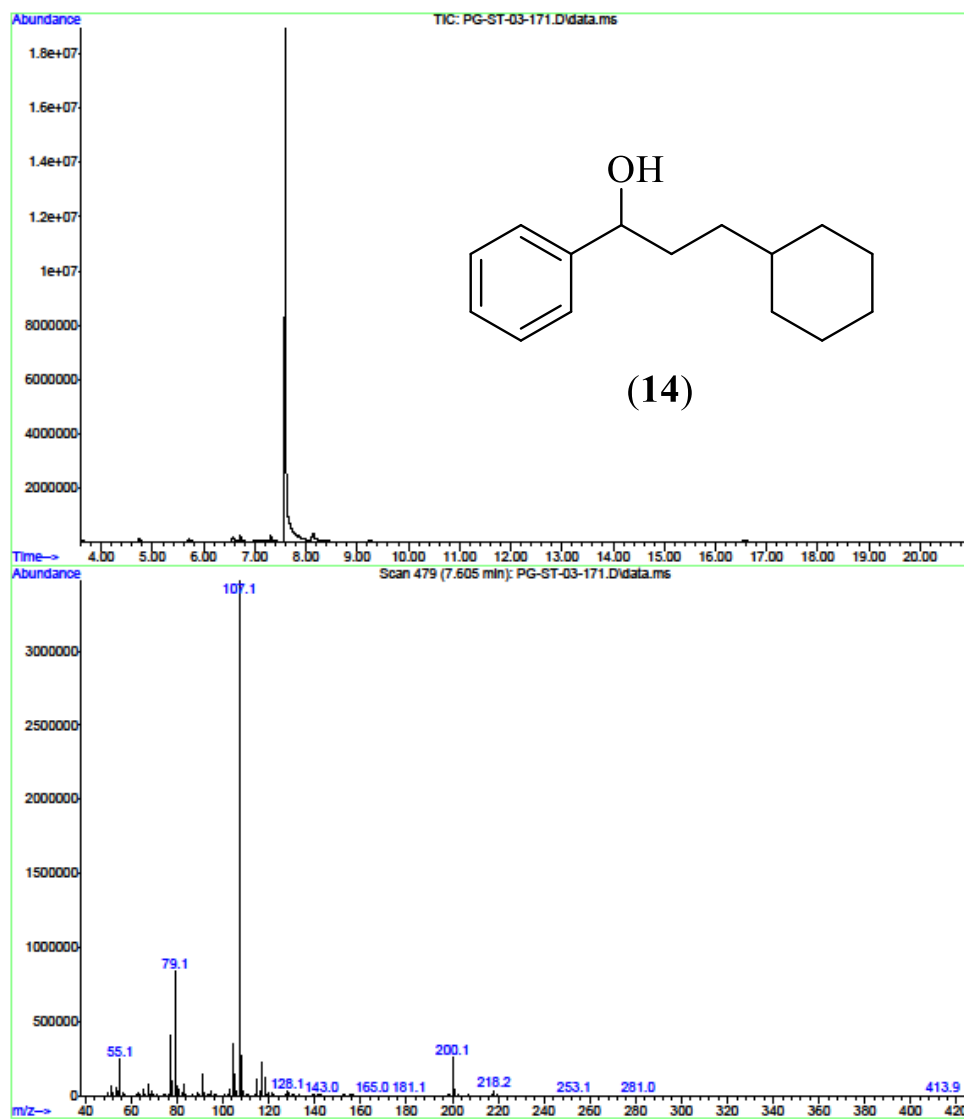

Figure S101. GCMS trace in EtOAc of (14) showing the  $M^+$  peak at  $m/z$  218.

Document: CHNS21072022 (varioMICRO) from: --,--,-- (modified)

SP18022016  
varioMICRO CHNS  
serial number: 15154051

Graphic report

| No. | Weight [mg] | Name         | Method     | N Area | C Area | H Area | N [%] | C [%] | H [%] | Info |
|-----|-------------|--------------|------------|--------|--------|--------|-------|-------|-------|------|
| 68  | 0.8540      | PG-ST-03-171 | 2mgChem80s | 1 685  | 19 977 | 7 744  | 0.00  | 81.96 | 9.703 | Snp  |

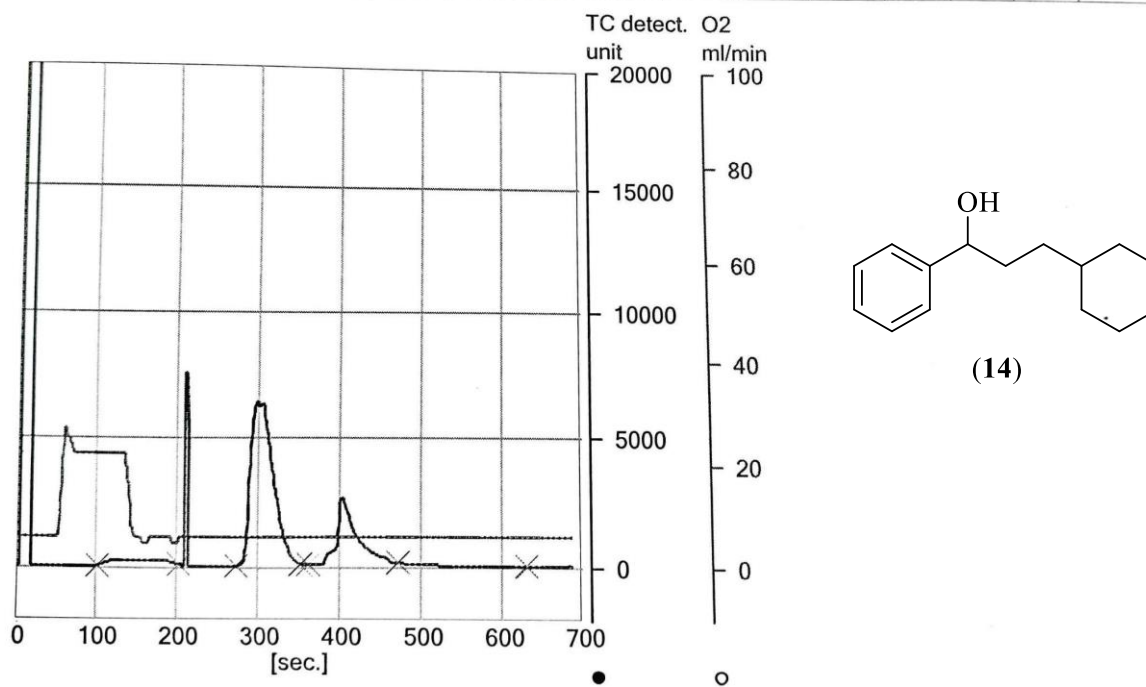

Figure S102. Elemental analysis data of (14).

PG-ST-03-170-3-1H-1

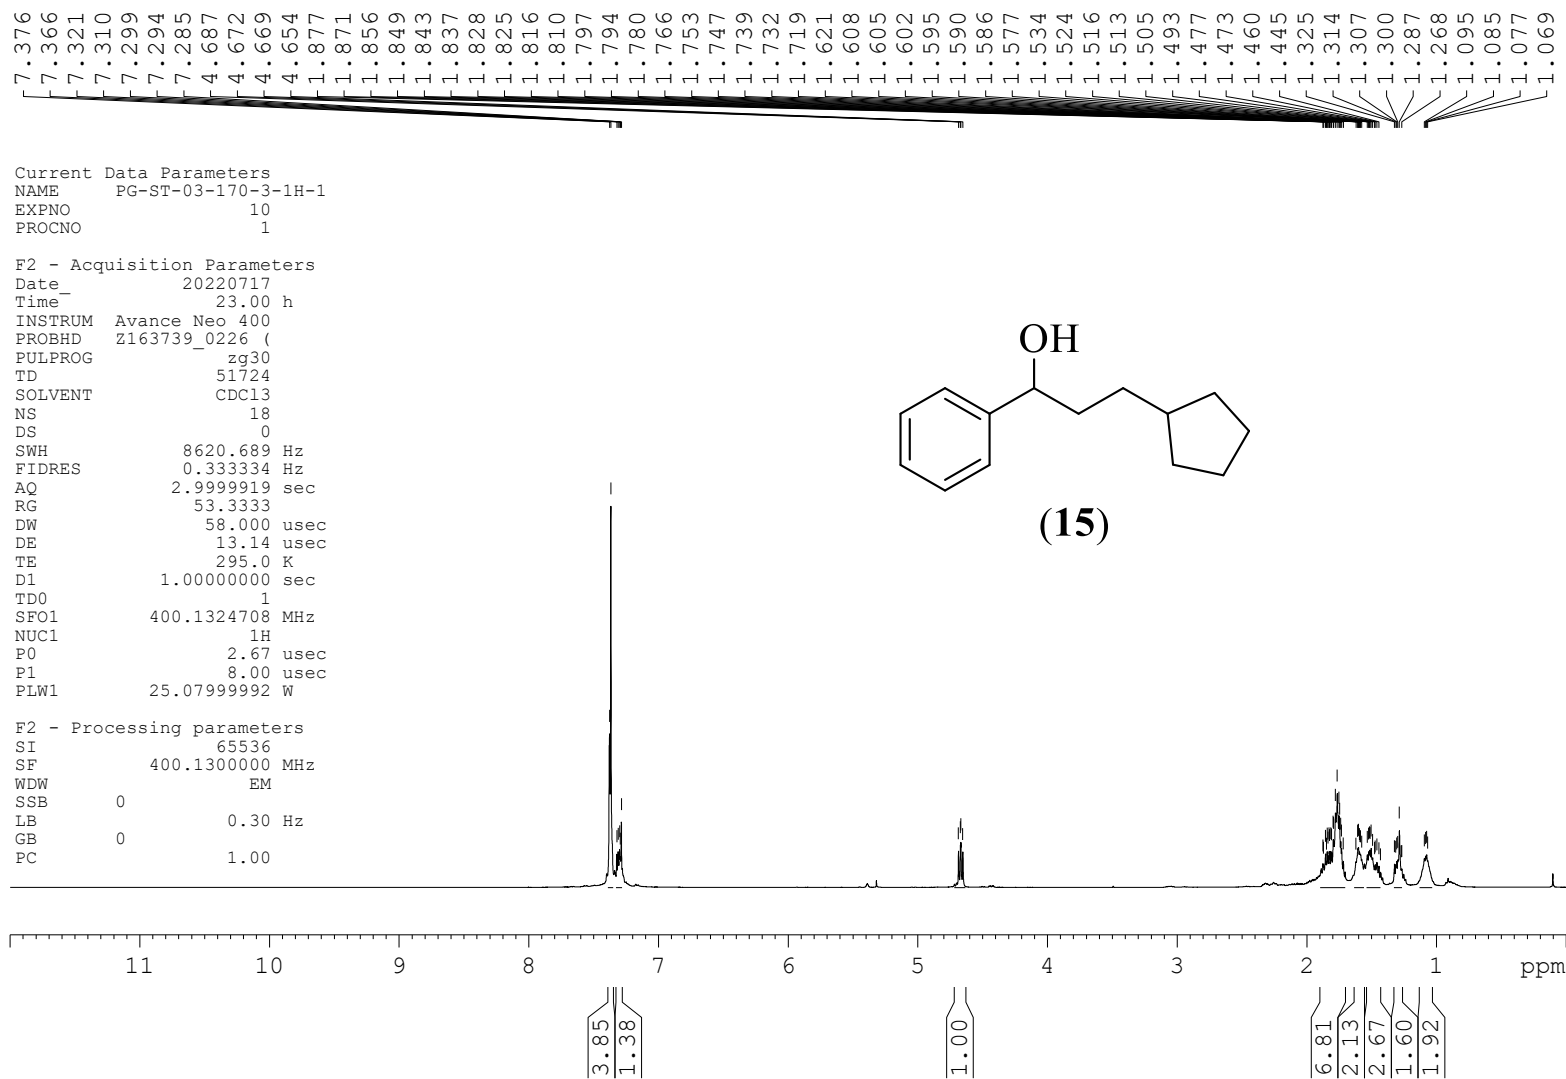

Figure S103. <sup>1</sup>H NMR spectrum of (15) in CDCl<sub>3</sub>.

PG-ST-03-170-3-1H-1

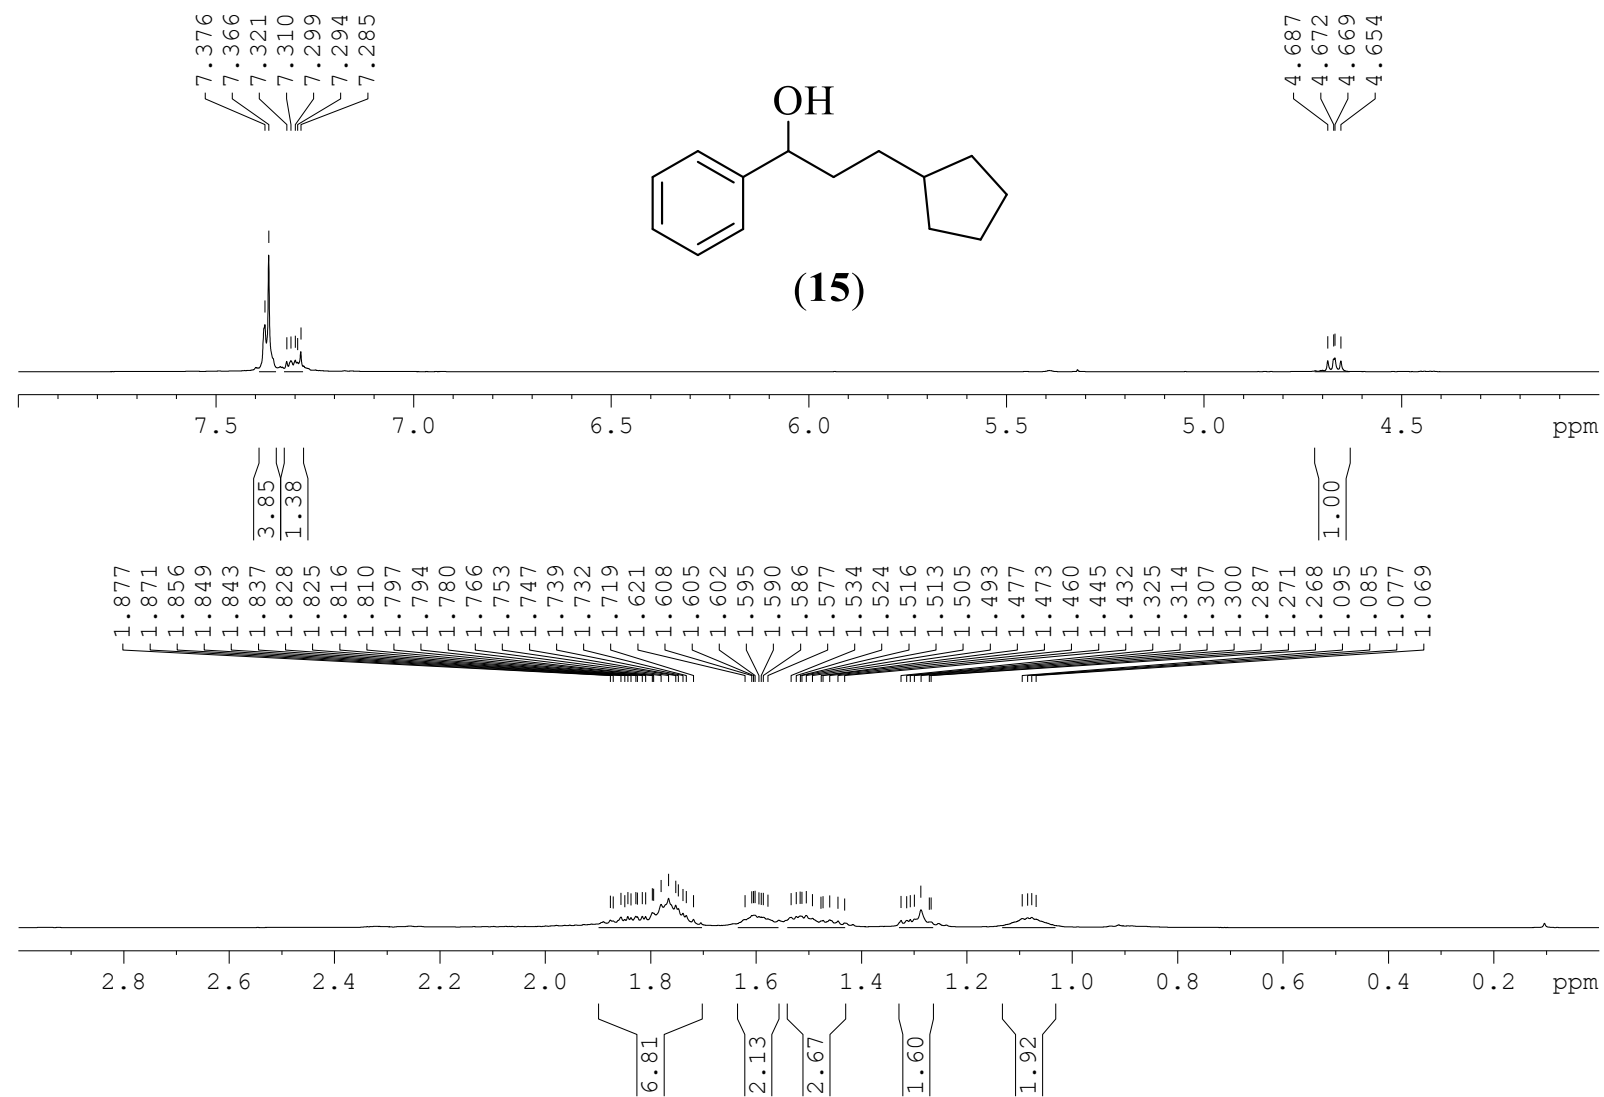

Figure S104. Expanded  $^1\text{H}$  NMR spectrum of (15) in  $\text{CDCl}_3$ .

PG-ST-03-170-3-13C-1

Current Data Parameters  
NAME PG-ST-03-170-3-13C-1  
EXPNO 12  
PROCNO 1

F2 - Acquisition Parameters  
Date\_ 20220717  
Time\_ 23.02 h  
INSTRUM Avance Neo 400  
PROBHD z163739\_0226 (  
PULPROG zgpg30  
TD 65536  
SOLVENT CDCl3  
NS 70  
DS 2  
SWH 27777.777 Hz  
FIDRES 0.847710 Hz  
AQ 1.1796480 sec  
RG 101  
DW 18.000 usec  
DE 6.50 usec  
TE 295.3 K  
D1 1.00000000 sec  
D11 0.03000000 sec  
TD0 1  
SFO1 100.6242384 MHz  
NUC1 13C  
P0 2.67 usec  
P1 8.00 usec  
PLW1 99.33999634 W  
SFO2 400.1316005 MHz  
NUC2 1H  
CPDPRG[2] waltz65  
PCPD2 90.00 usec  
PLW2 25.07999992 W  
PLW12 0.19815999 W  
PLW13 0.09967500 W

F2 - Processing parameters  
SI 32768  
SF 100.6127685 MHz  
WDW EM  
SSB 0  
LB 1.00 Hz  
GB 0  
PC 1.40

— 144.94

128.45  
127.51  
125.94

77.37  
77.06  
76.74  
74.97

40.07  
38.31  
32.72  
32.64  
32.24  
25.19

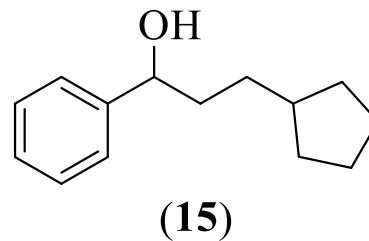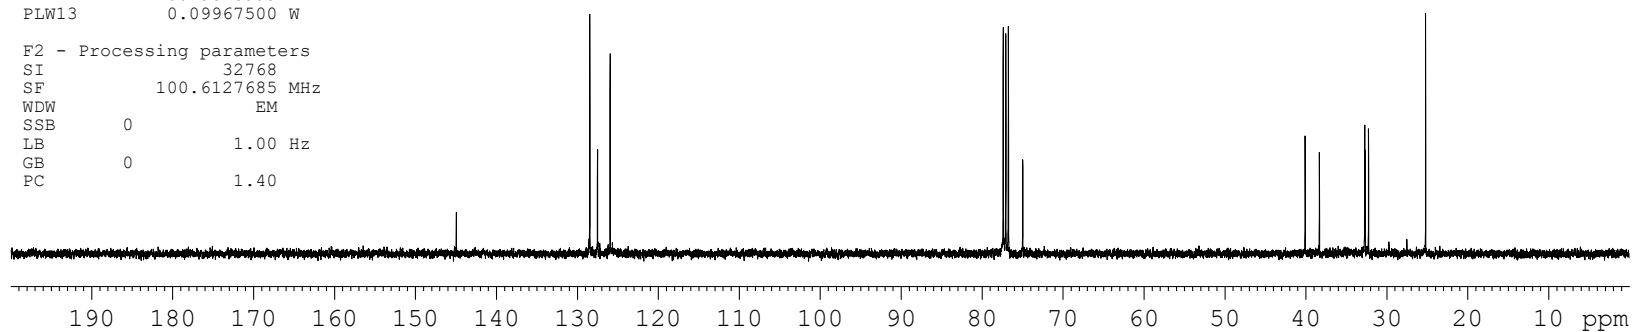

Figure S105.  $^{13}\text{C}\{^1\text{H}\}$  NMR spectrum of (15) in  $\text{CDCl}_3$ .

PG-ST-03-170-3-13C-1

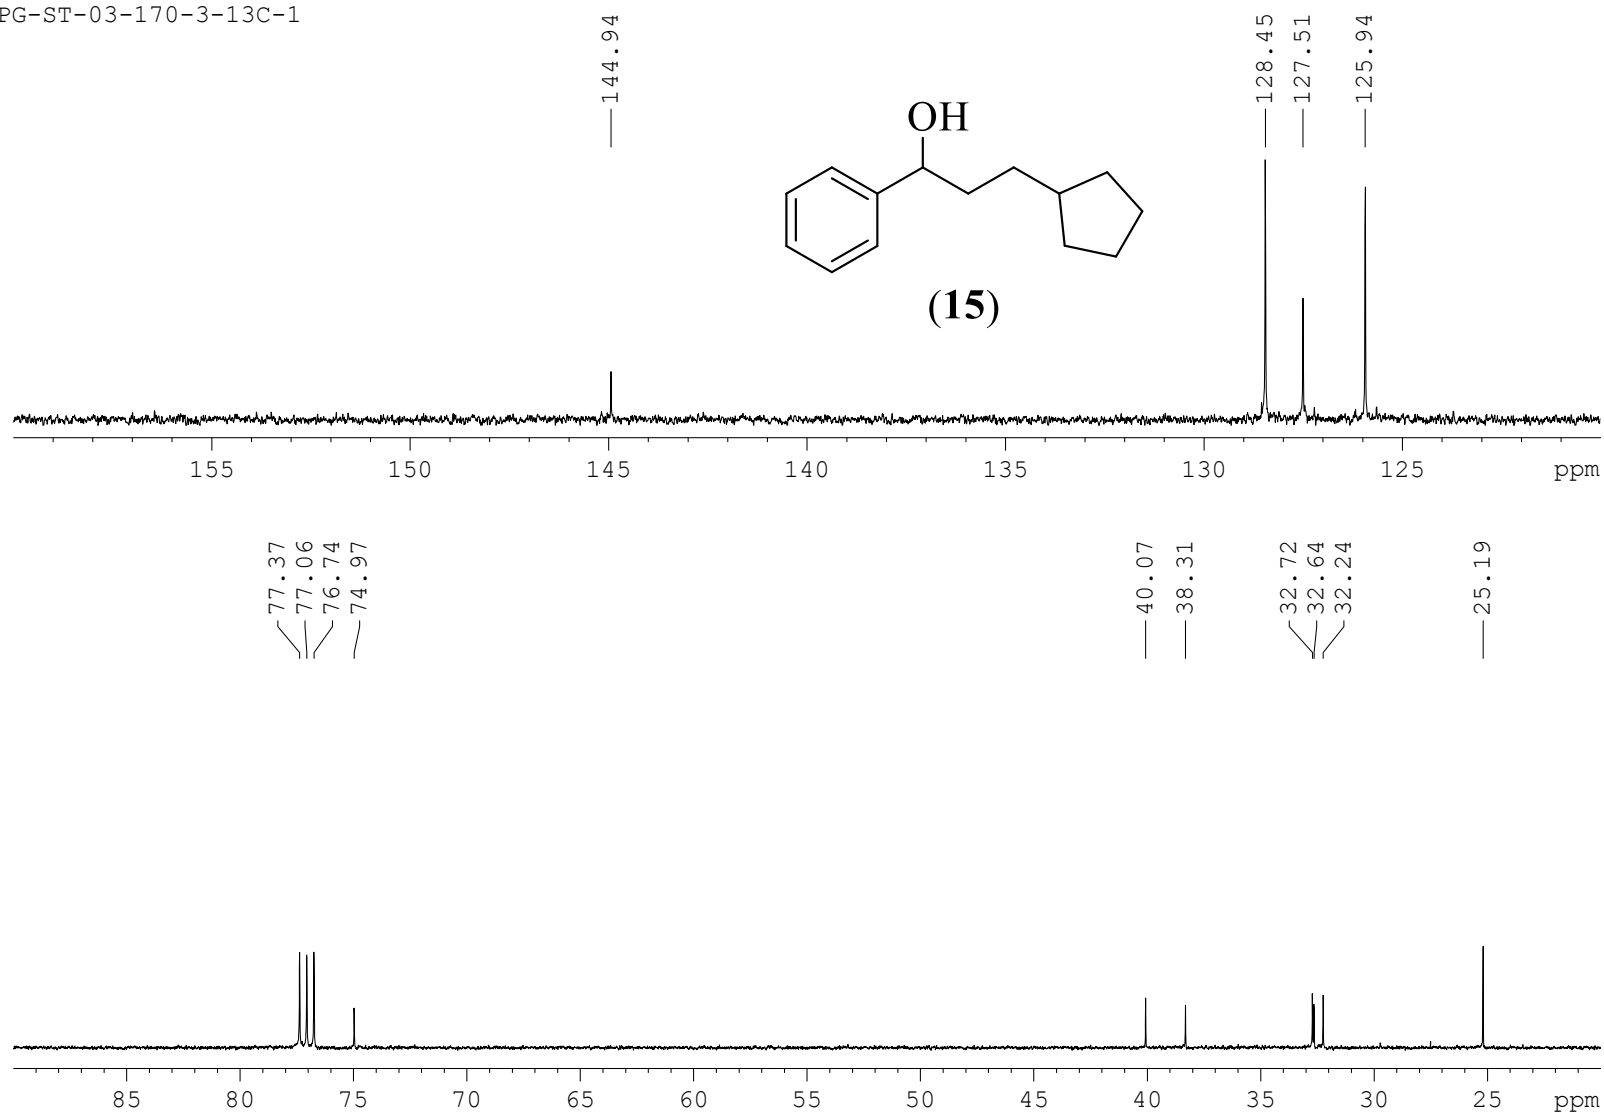

**Figure S106.** Expanded  $^{13}\text{C}\{^1\text{H}\}$  NMR spectrum of (15) in  $\text{CDCl}_3$ .



File : F:\GCMS-DATA-2022\july 2022\PG-ST-03-170-2.D  
Operator : SACHIN  
Acquired : 18 Jul 2022 15:53 using AcqMethod NEWMETHOD-2022.M  
Instrument : GCMS  
Sample Name: PG-ST-03-170-2  
Misc Info :  
Vial Number: 6

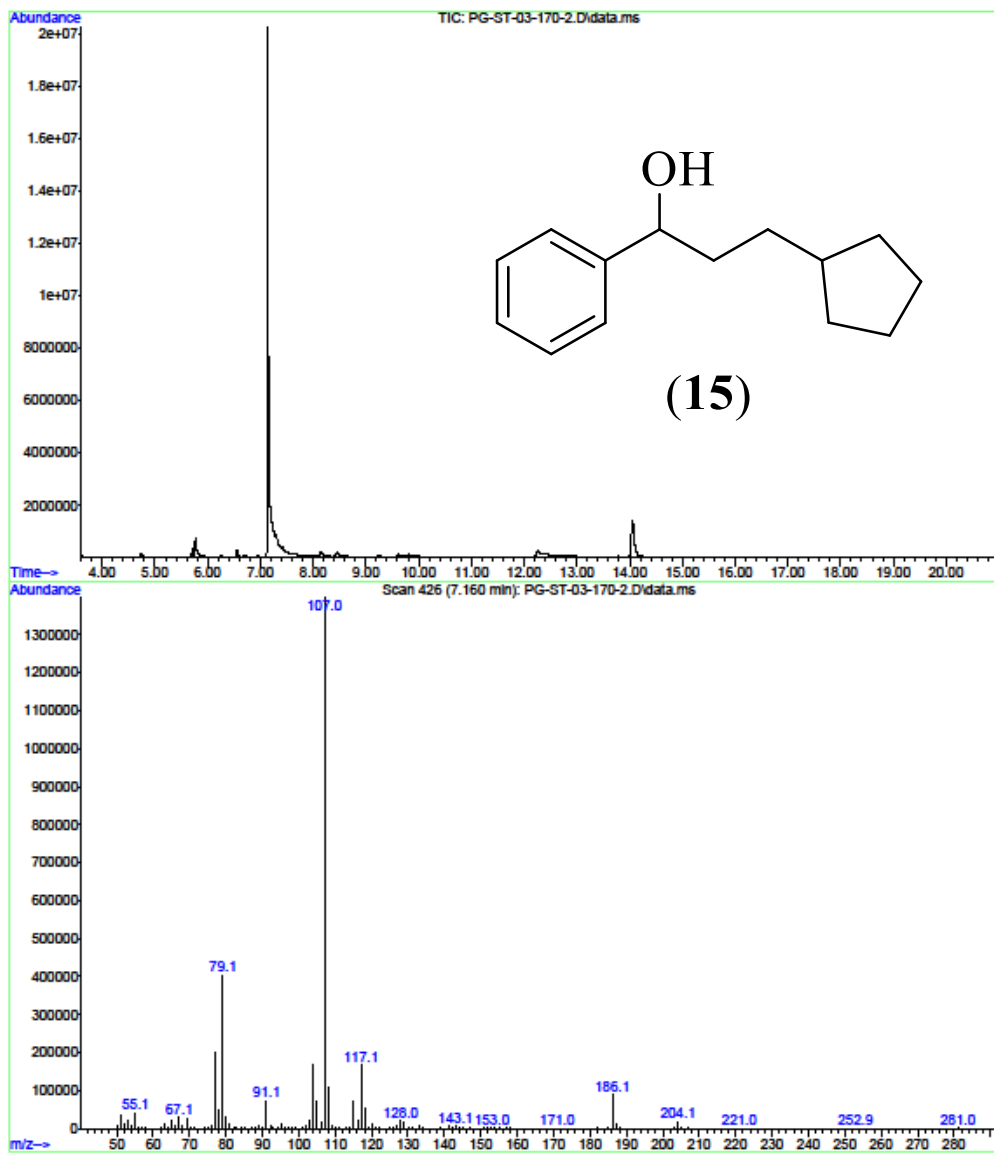

Figure S107. GCMS trace in EtOAc of (15) showing the  $M^+$  peak at  $m/z$  186.

Document: CHNS21072022 (varioMICRO) from: 22-07-2022 12:38:21

SP18022016  
varioMICRO CHNS  
serial number: 15154051

Graphic report

| No. | Weight [mg] | Name           | Method     | N Area | C Area | H Area | N [%] | C [%] | H [%] | Info |
|-----|-------------|----------------|------------|--------|--------|--------|-------|-------|-------|------|
| 64  | 0.9520      | PG-ST-03-170-2 | 2mgChem80s | 1 730  | 22 226 | 7 954  | 0.00  | 81.67 | 8.980 | Snp  |

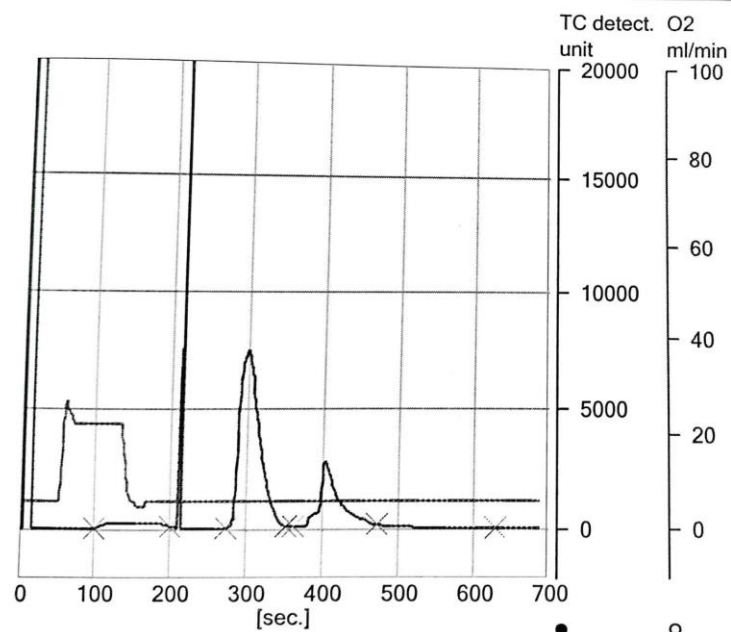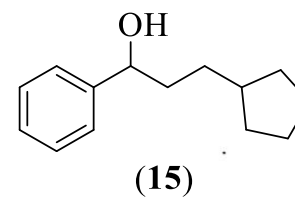

Scanned by TapScanner

Figure S108. Elemental analysis data of (15).

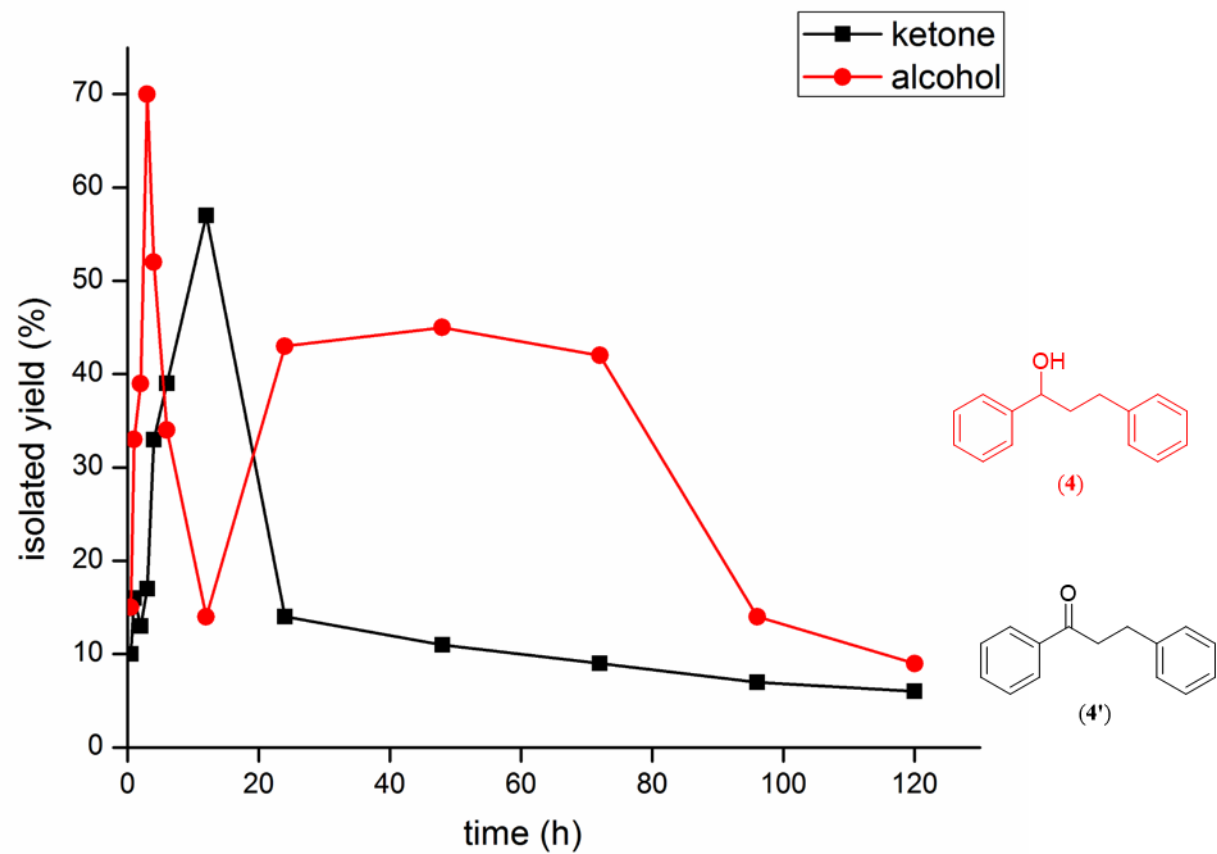

**Figure S109.** An overlay of the formation of (4) and (4') as a function of time in the reaction of 1-phenylethanol and benzyl alcohol as catalyzed by the Ru-NHC complex (1b).

PG-ST-02-187-01-1H

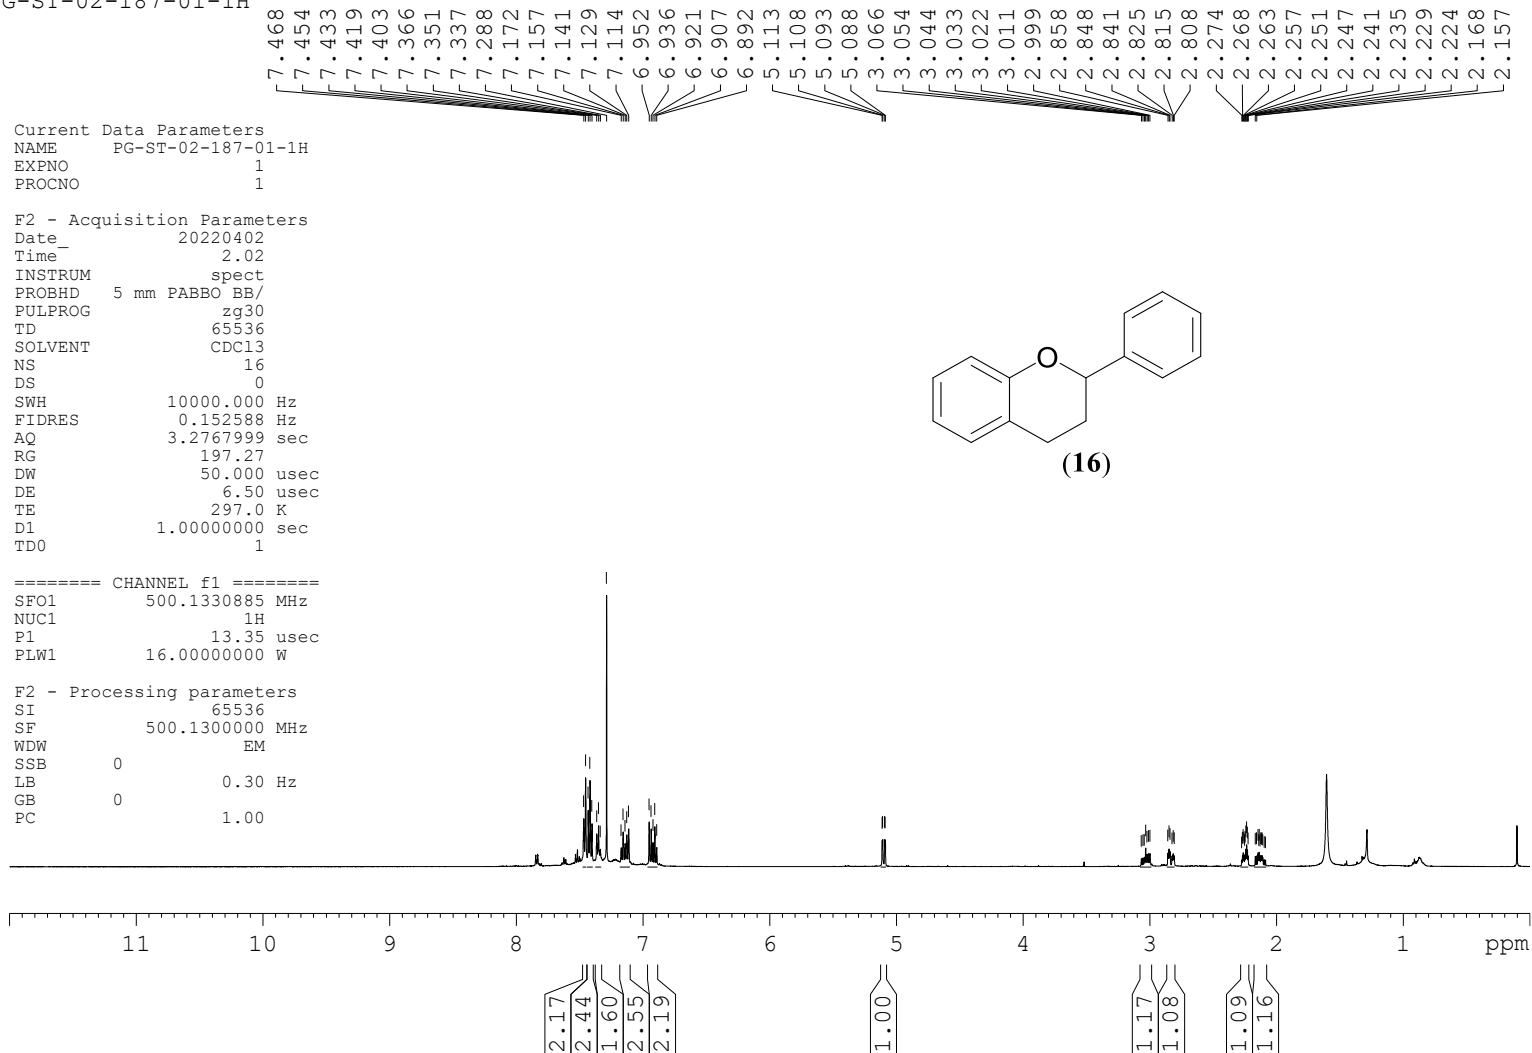

Figure S110. <sup>1</sup>H NMR spectrum of (16) in CDCl<sub>3</sub>.

PG-ST-02-187-01-1H

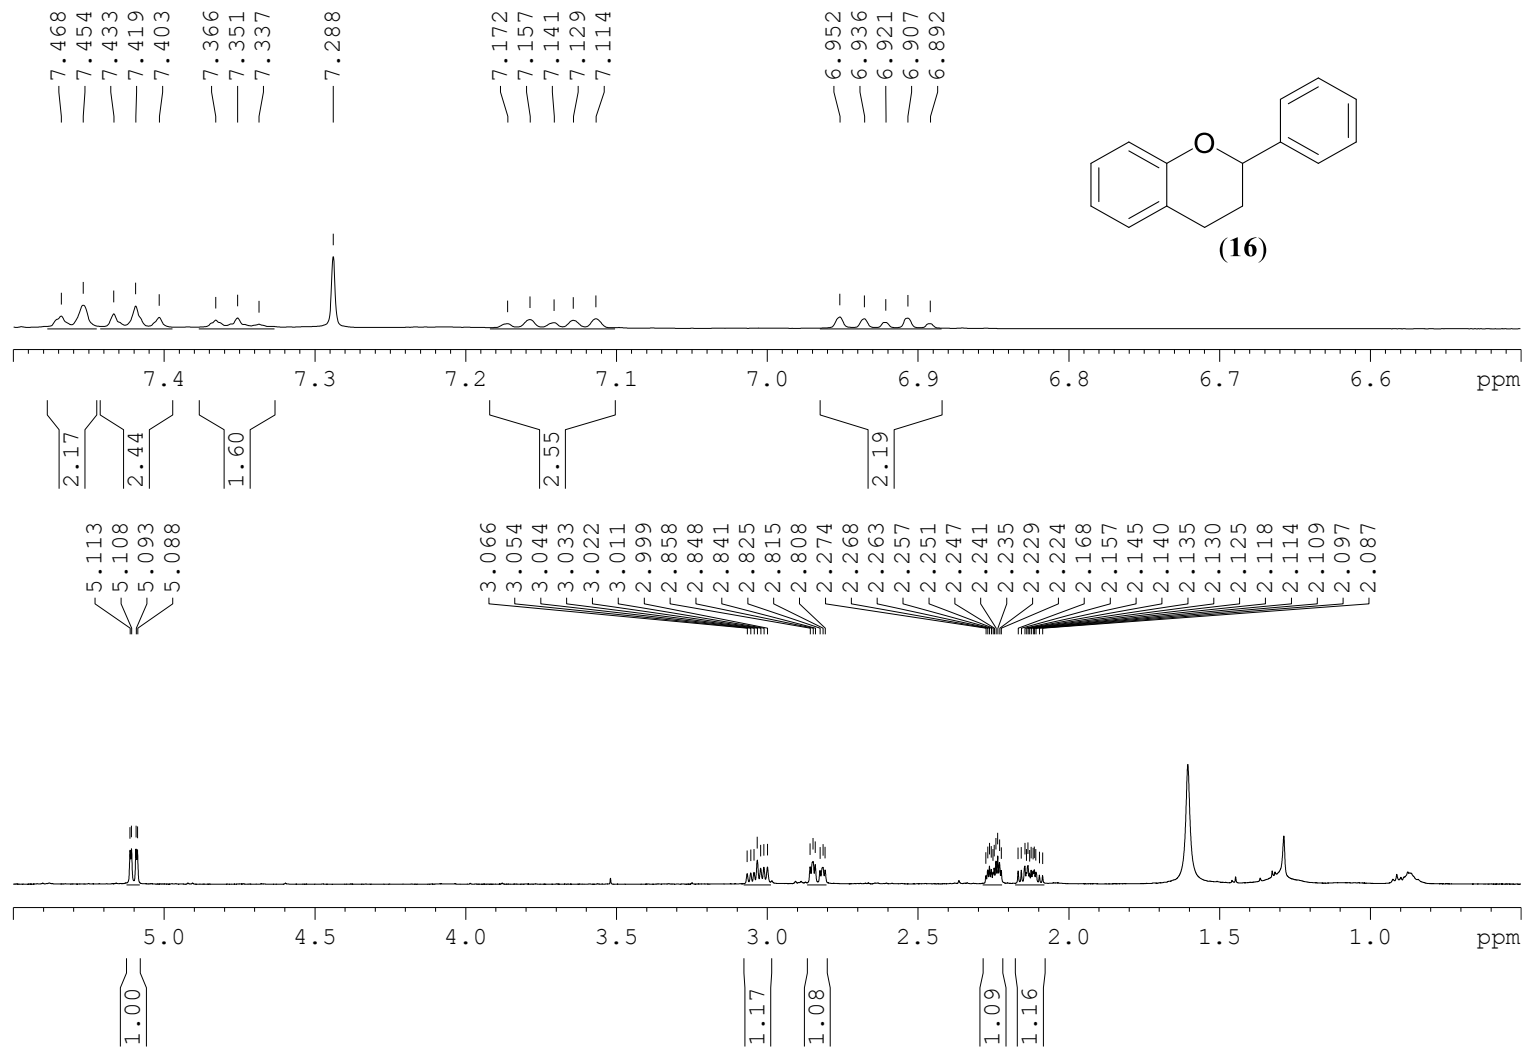

Figure S111. Expanded  $^1\text{H}$  NMR spectrum of (16) in  $\text{CDCl}_3$ .

PG-ST-02-187-01-13C

Current Data Parameters  
NAME PG-ST-02-187-01-13C  
EXPNO 1  
PROCNO 1

F2 - Acquisition Parameters  
Date\_ 20220402  
Time\_ 2.04  
INSTRUM spect  
PROBHD 5 mm PABBO BB/  
PULPROG zgpg30  
TD 65536  
SOLVENT CDCl3  
NS 1827  
DS 0  
SWH 29761.904 Hz  
FIDRES 0.454131 Hz  
AQ 1.1010048 sec  
RG 197.27  
DW 16.800 usec  
DE 6.50 usec  
TE 297.0 K  
D1 2.00000000 sec  
D11 0.03000000 sec  
TD0 1

=====  
CHANNEL f1  
SFO1 125.7703637 MHz  
NUC1 13C  
P1 8.90 usec  
PLW1 103.00000000 W

=====  
CHANNEL f2  
SFO2 500.1320005 MHz  
NUC2 1H  
CPDPRG[2] waltz16  
PCPD2 80.00 usec  
PLW2 16.00000000 W  
PLW12 0.44556001 W  
PLW13 0.22411001 W

F2 - Processing parameters  
SI 32768  
SF 125.7577890 MHz  
WDW EM  
SSB 0  
LB 1.00 Hz  
GB 0  
PC 1.40

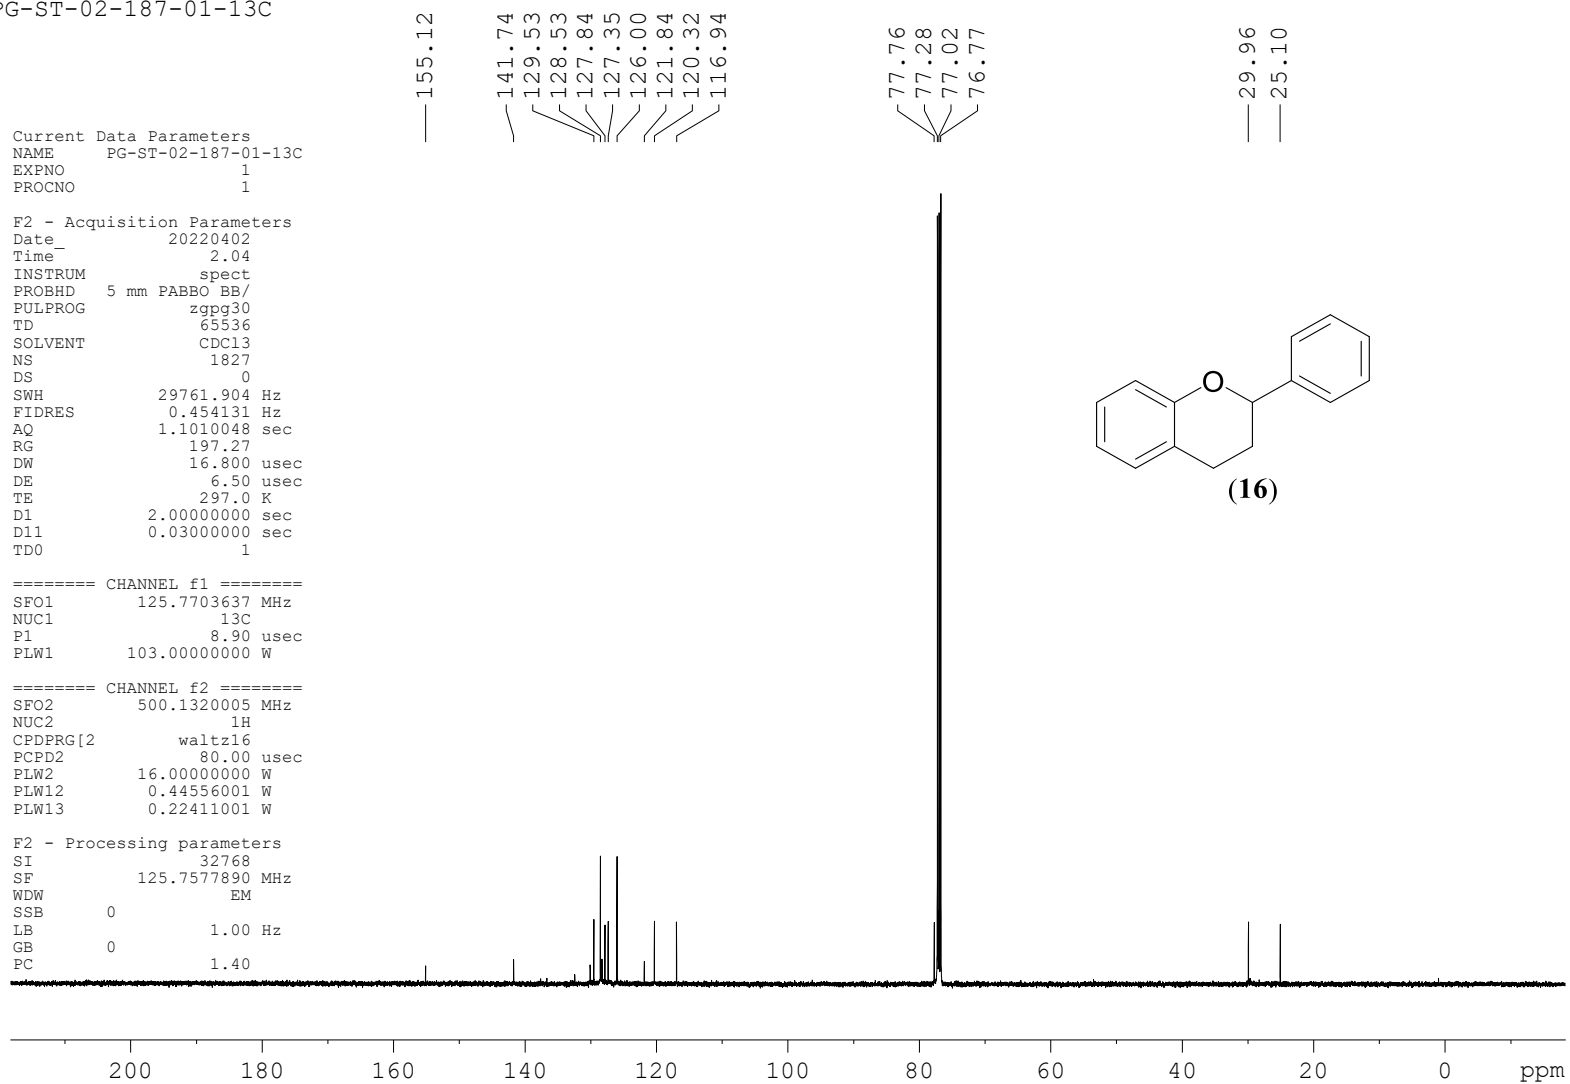

Figure S112.  $^{13}\text{C}\{^1\text{H}\}$  NMR spectrum of (16) in  $\text{CDCl}_3$ .

PG-ST-02-187-01-13C

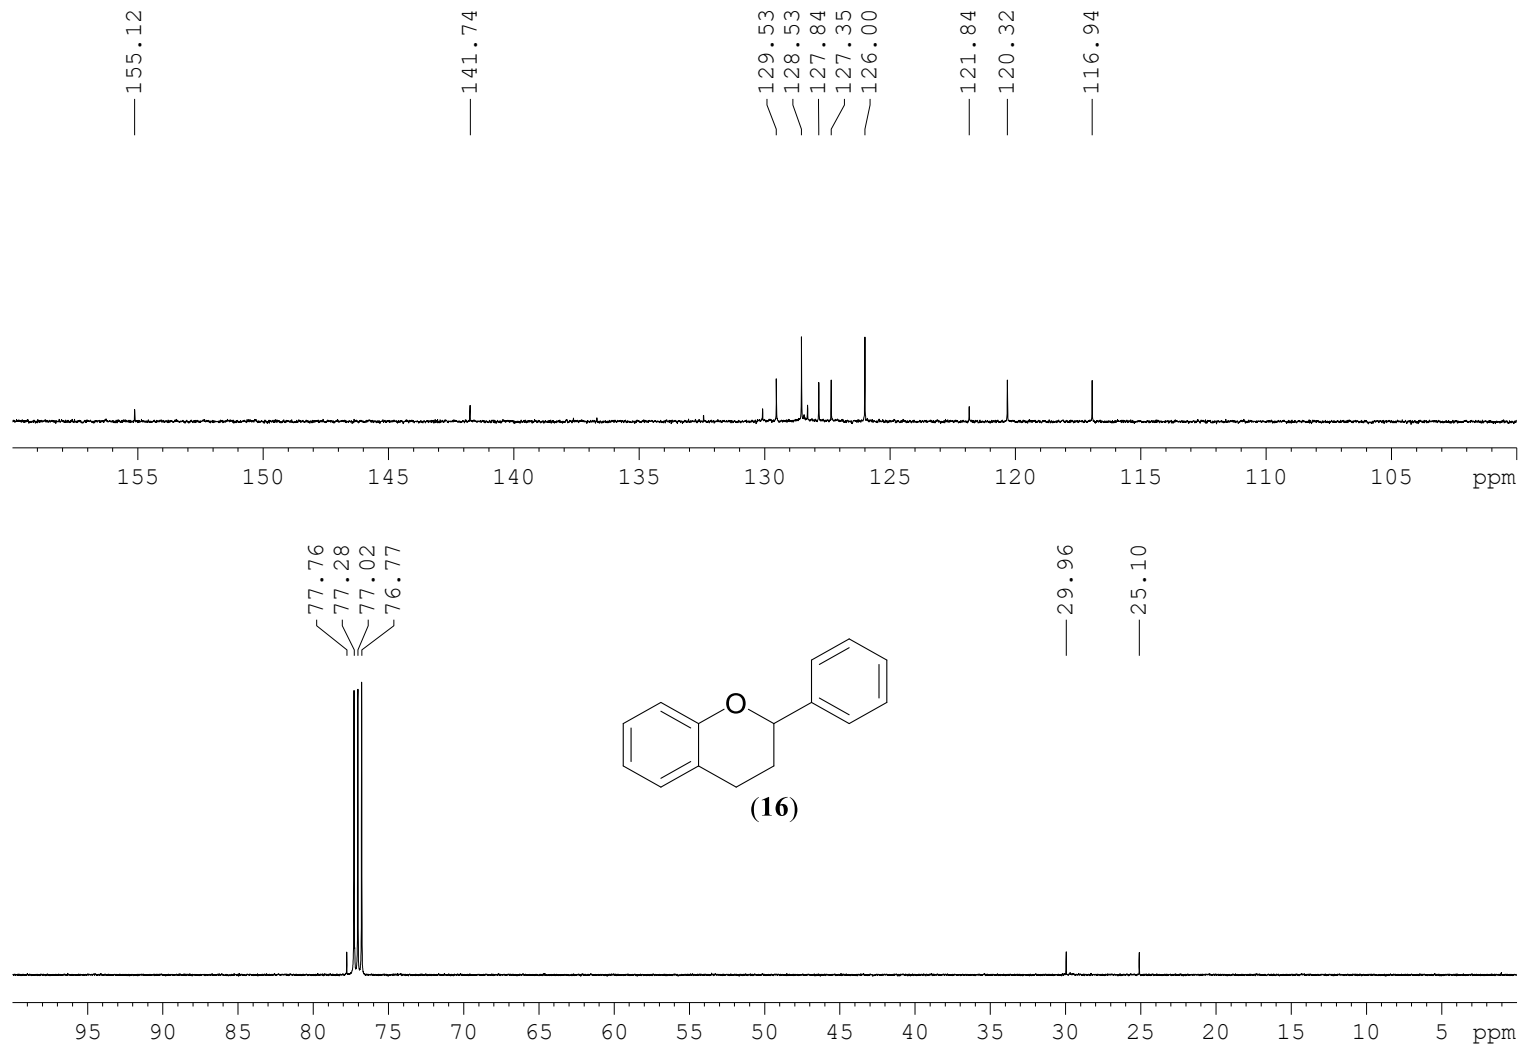

Figure S113. Expanded  $^{13}\text{C}\{^1\text{H}\}$  NMR spectrum of (16) in  $\text{CDCl}_3$ .

File : F:\GCMS-DATA-2021\OCT2021\PG-ST-02-187-01.D  
Operator : RM  
Acquired : 10 Nov 2021 18:08 using AcqMethod COMMONMETHOD-2010.M  
Instrument : GCMS  
Sample Name: PG-ST-02-187-01  
Misc Info :  
Vial Number: 1

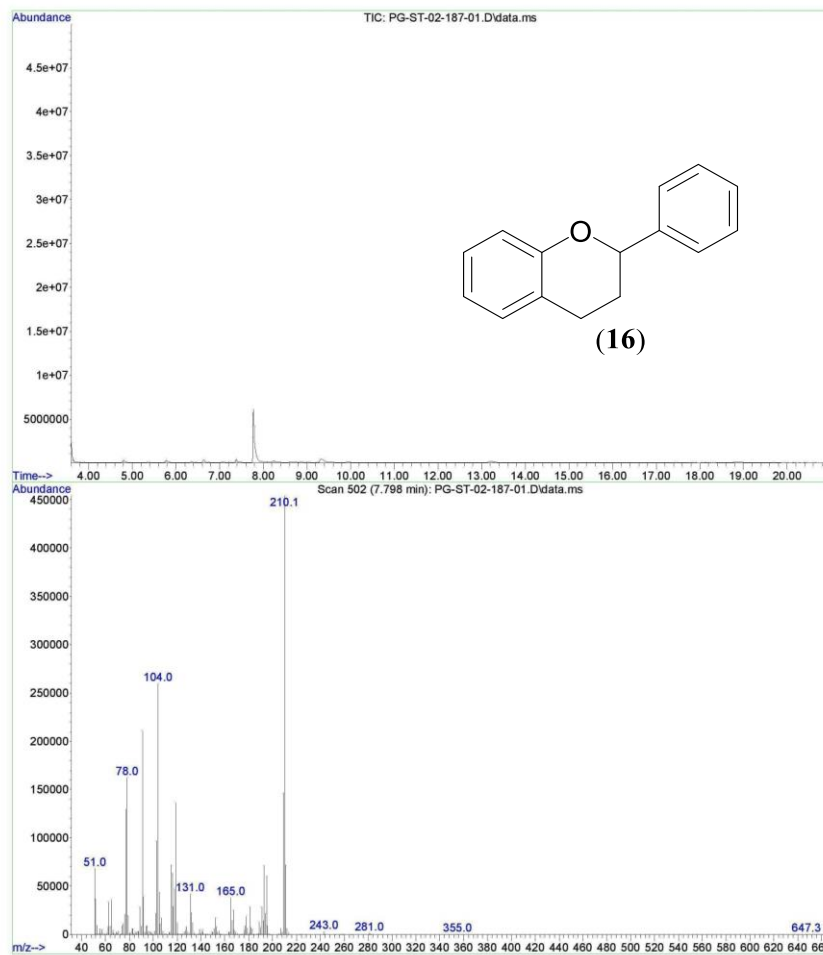

**Figure S114.** GCMS trace in EtOAc of (16) showing the  $M^+$  peak at  $m/z$  210.



| No. | Weight [mg] | Name           | Method     | N Area | C Area | H Area | N [%] | C [%] | H [%] | Date       | Time  | Info |
|-----|-------------|----------------|------------|--------|--------|--------|-------|-------|-------|------------|-------|------|
| 48  | 1.0410      | PG-ST-02-187-3 | 2mgChem80s | 2 878  | 24 605 | 7 023  | 0.00  | 84.82 | 6.096 | 21-01-2022 | 22:22 | Snp  |

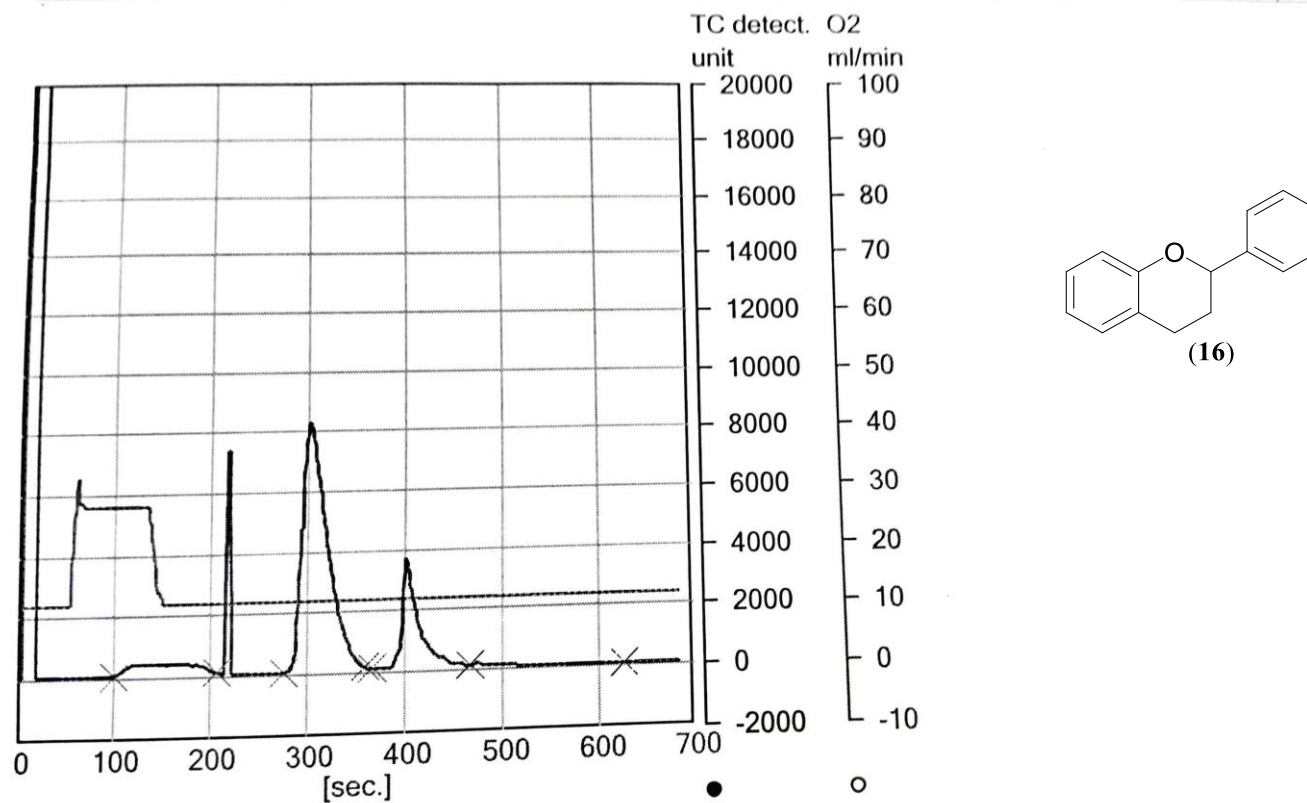

**Figure S115.** Elemental analysis data of (16).

PG-ST-02-196-01-1H

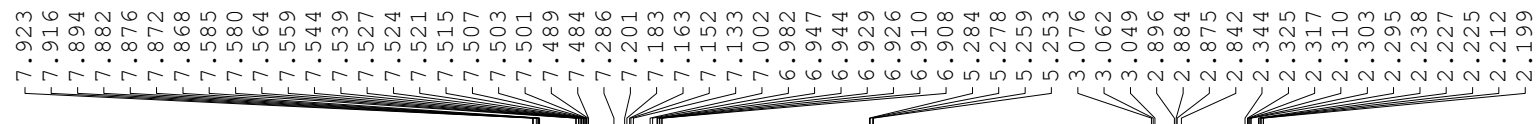

Current Data Parameters  
NAME PG-ST-02-196-01-1H  
EXPNO 10  
PROCNO 1

F2 - Acquisition Parameters  
Date\_ 20211114  
Time 22.35 h  
INSTRUM Avance Neo 400  
PROBHD z163739\_0226 (  
PULPROG zg30  
TD 51724  
SOLVENT CDCl3  
NS 18  
DS 0  
SWH 8620.689 Hz  
FIDRES 0.333334 Hz  
AQ 2.9999919 sec  
RG 101  
DW 58.000 usec  
DE 13.14 usec  
TE 296.4 K  
D1 1.0000000 sec  
TD0 1  
SFO1 400.1324708 MHz  
NUC1 1H  
P0 2.67 usec  
P1 8.00 usec  
PLW1 25.07999992 W

F2 - Processing parameters  
SI 65536  
SF 400.1300000 MHz  
WDW EM  
SSB 0  
LB 0.30 Hz  
GB 0  
PC 1.00

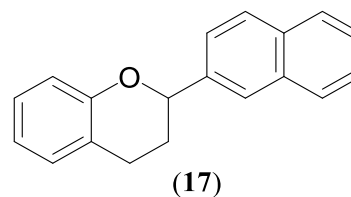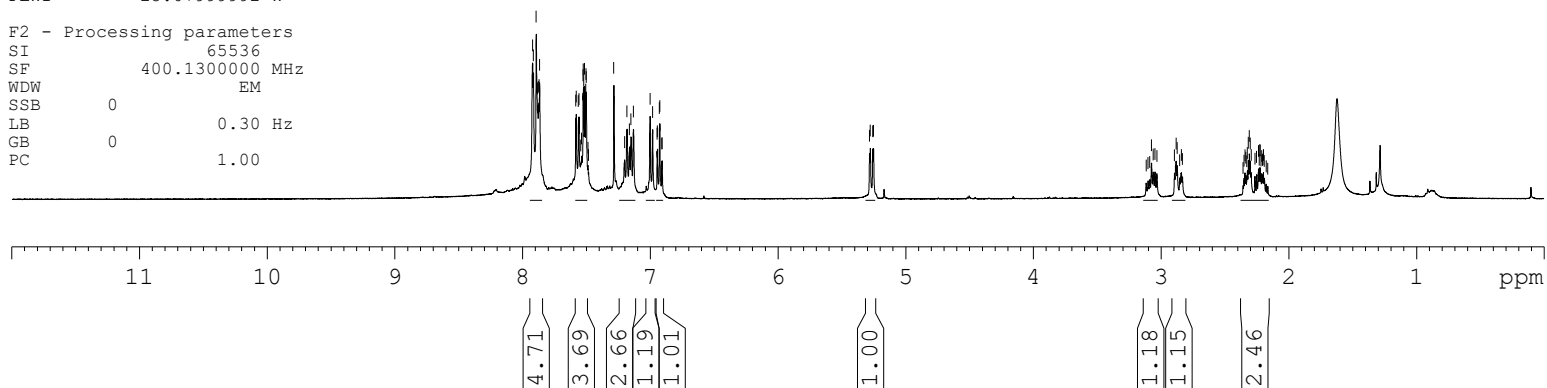

Figure S116.  $^1\text{H}$  NMR spectrum of (17) in  $\text{CDCl}_3$ .

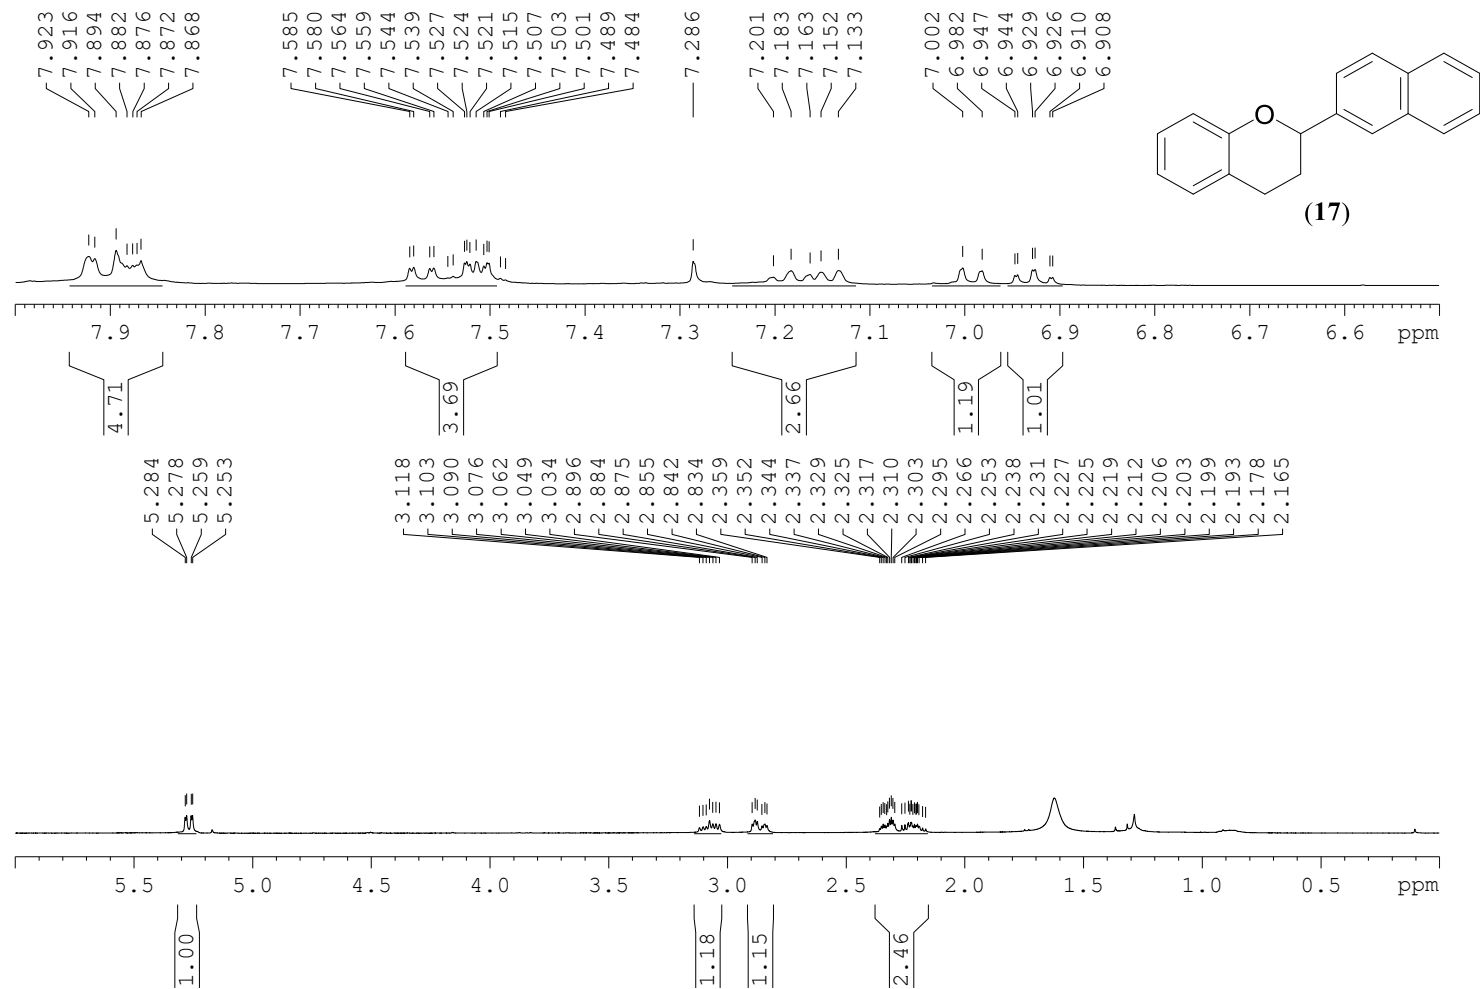

Figure S117. Expanded  $^1\text{H}$  NMR spectrum of (17) in  $\text{CDCl}_3$ .

PG-ST-02-196-01-13C

Current Data Parameters  
NAME PG-ST-02-196-01-13C  
EXPNO 12  
PROCNO 1

F2 - Acquisition Parameters  
Date\_ 20211114  
Time 22.54 h  
INSTRUM Avance Neo 400  
PROBHD Z163739\_0226 (  
PULPROG zgpg30  
TD 65536  
SOLVENT CDCl3  
NS 500  
DS 2  
SWH 27777.777 Hz  
FIDRES 0.847710 Hz  
AQ 1.1796480 sec  
RG 101  
DW 18.000 usec  
DE 6.50 usec  
TE 297.0 K  
D1 1.00000000 sec  
D11 0.03000000 sec  
TD0 1  
SFO1 100.6242384 MHz  
NUC1 13C  
P0 2.67 usec  
P1 8.00 usec  
PLW1 99.33999634 W  
SFO2 400.1316005 MHz  
NUC2 1H  
CPDPRG[2] waltz65  
PCPD2 90.00 usec  
PLW2 25.07999992 W  
PLW12 0.19815999 W  
PLW13 0.09967500 W

F2 - Processing parameters  
SI 32768  
SF 100.6127685 MHz  
WDW EM  
SSB 0  
LB 1.00 Hz  
GB 0  
PC 1.40

155.12  
139.13  
133.09  
129.58  
128.34  
128.07  
127.70  
127.41  
126.18  
125.97  
124.89  
124.03  
121.89  
120.40  
116.98

77.87  
77.35  
77.03  
76.72

29.98  
25.15

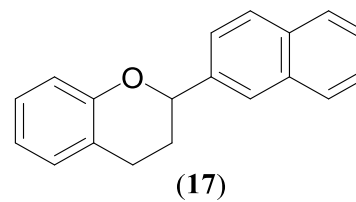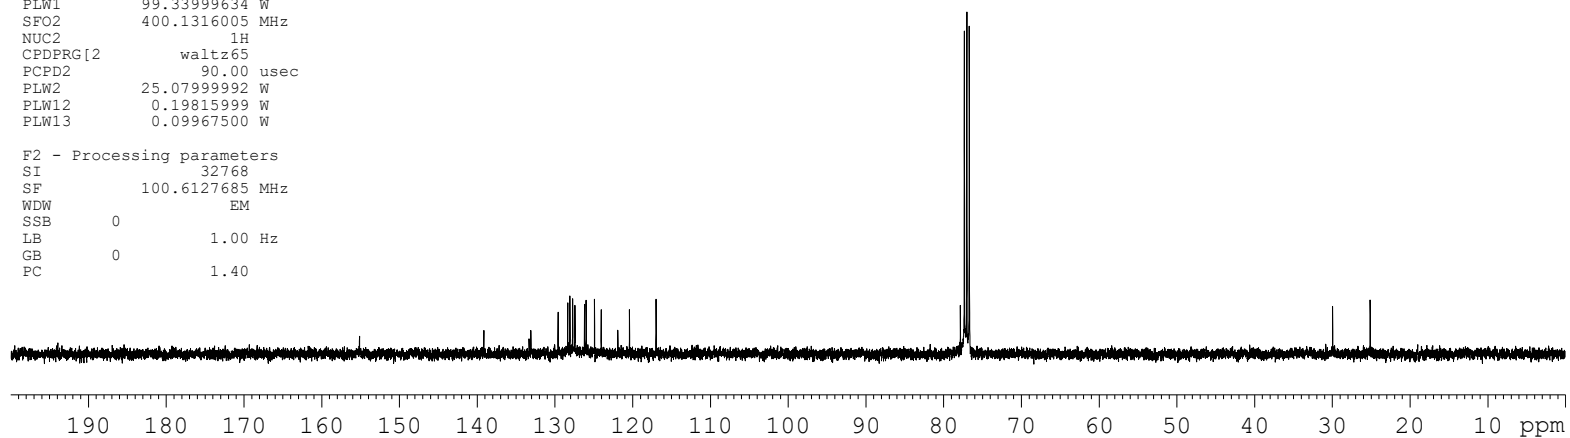

Figure S118.  $^{13}\text{C}\{^1\text{H}\}$  NMR spectrum of (17) in  $\text{CDCl}_3$ .

PG-ST-02-196-01-13C

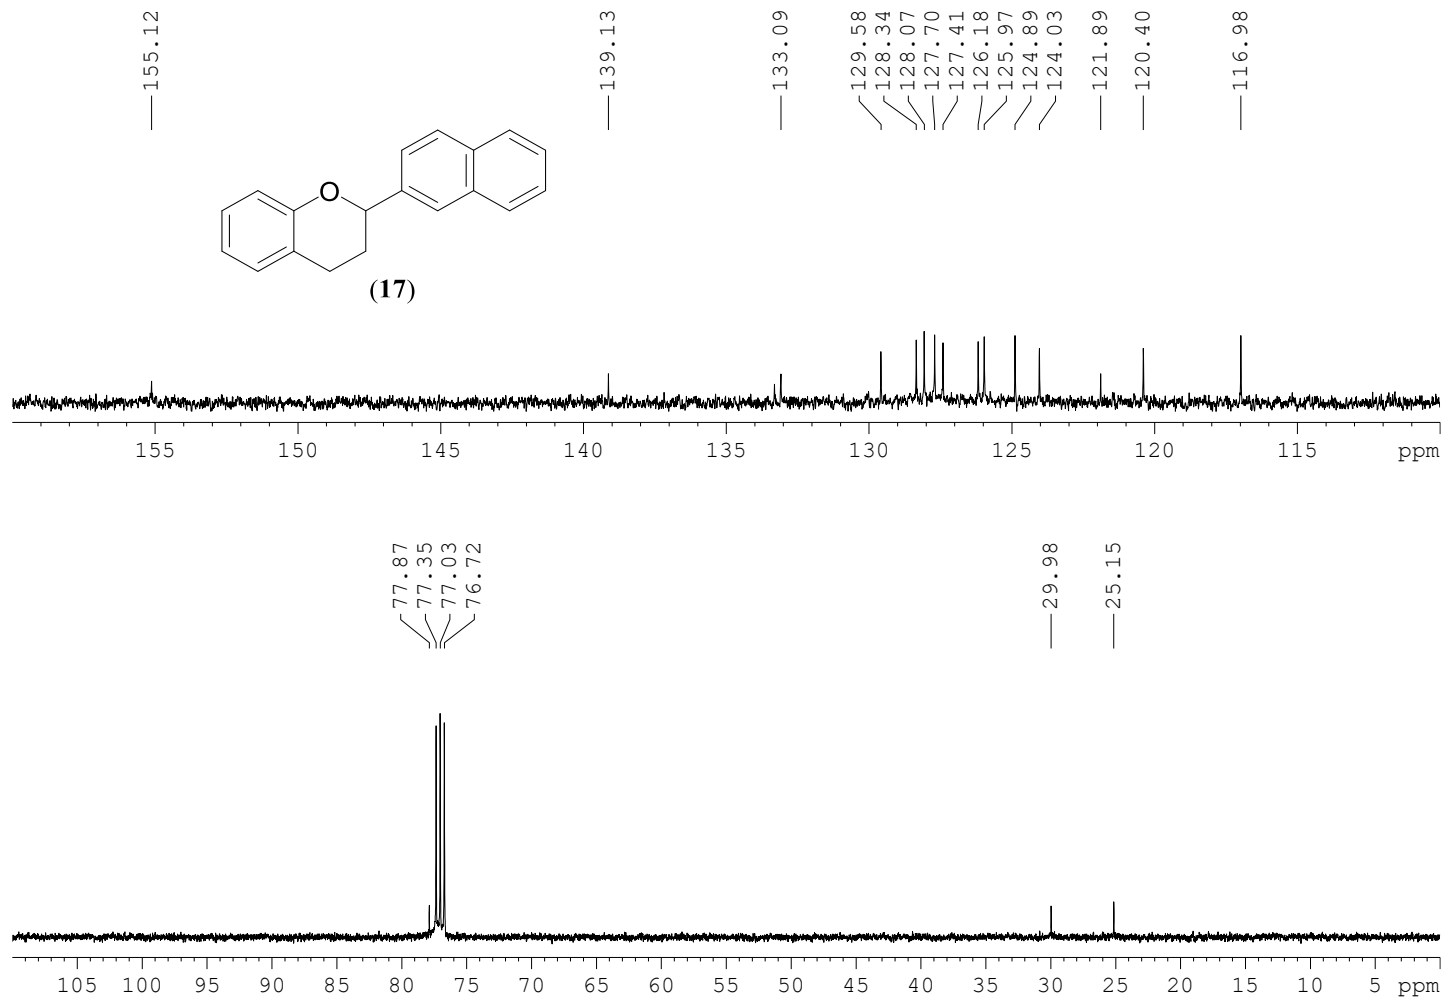

Figure S119. Expanded  $^{13}\text{C}\{^1\text{H}\}$  NMR spectrum of (17) in  $\text{CDCl}_3$ .

File : F:\GCMS-DATA-2021\NOV2021\PG-ST-02-196-2.D  
Operator : RM  
Acquired : 15 Nov 2021 16:46 using AcqMethod COMMONMETHOD-2010.M  
Instrument : GCMS  
Sample Name : PG-ST-02-196-2  
Misc Info :  
Vial Number: 4

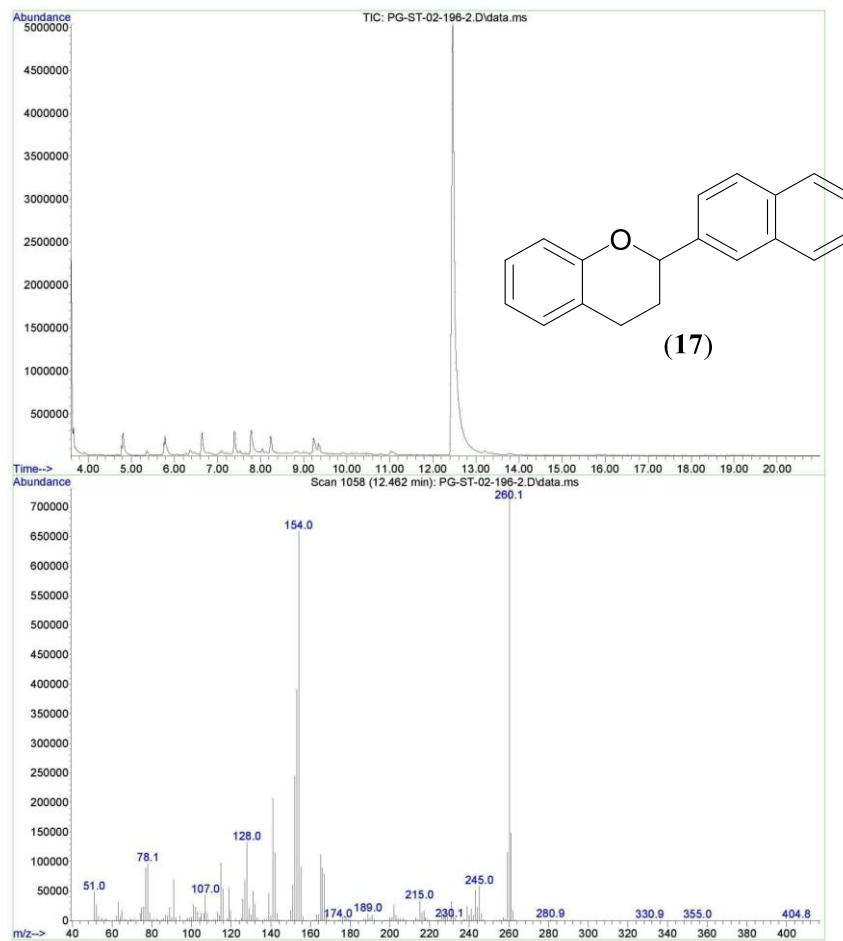

**Figure S120.** GCMS trace in EtOAc of (17) showing the  $M^+$  peak at  $m/z$  260.

Document: CHNS01022022 (varioMICRO) from: --- (modified)

SP18022016  
varioMICRO CHNS  
serial number: 15154051

Graphic report

| No. | Weight [mg] | Name           | Method     | N Area | C Area | H Area | N [%] | C [%] | H [%] | Date       | Time  | Info |
|-----|-------------|----------------|------------|--------|--------|--------|-------|-------|-------|------------|-------|------|
| 33  | 1.7210      | PG-ST-02-196-1 | 2mgChem80s | 2 834  | 41 889 | 11 567 | 0.00  | 87.33 | 7.023 | 01-02-2022 | 18:59 |      |

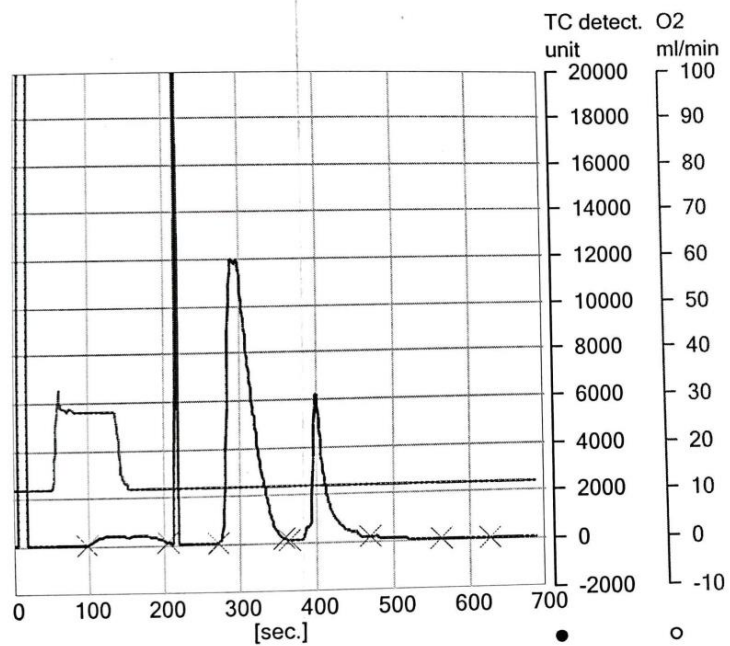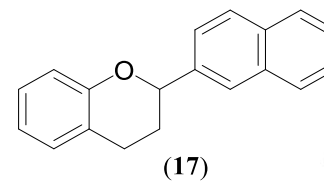

Figure S121. Elemental analysis data (17).

PG-ST-02-191-01-1H

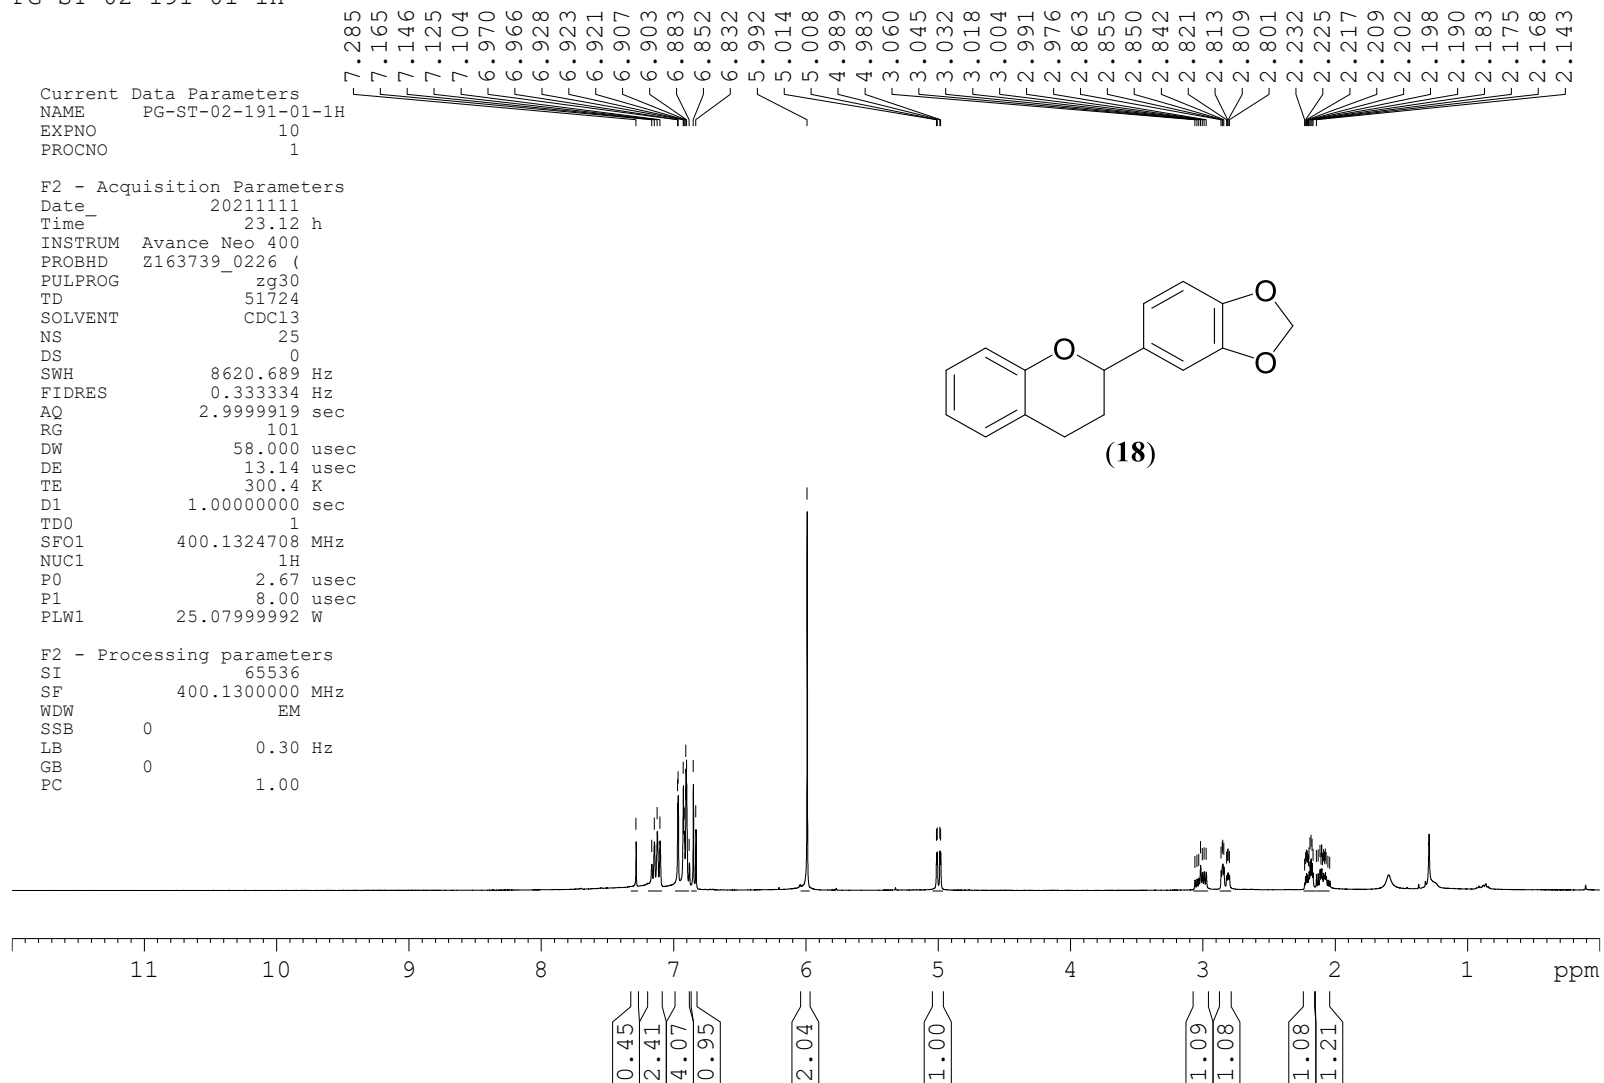

Figure S122. <sup>1</sup>H NMR spectrum of (18) in CDCl<sub>3</sub>.



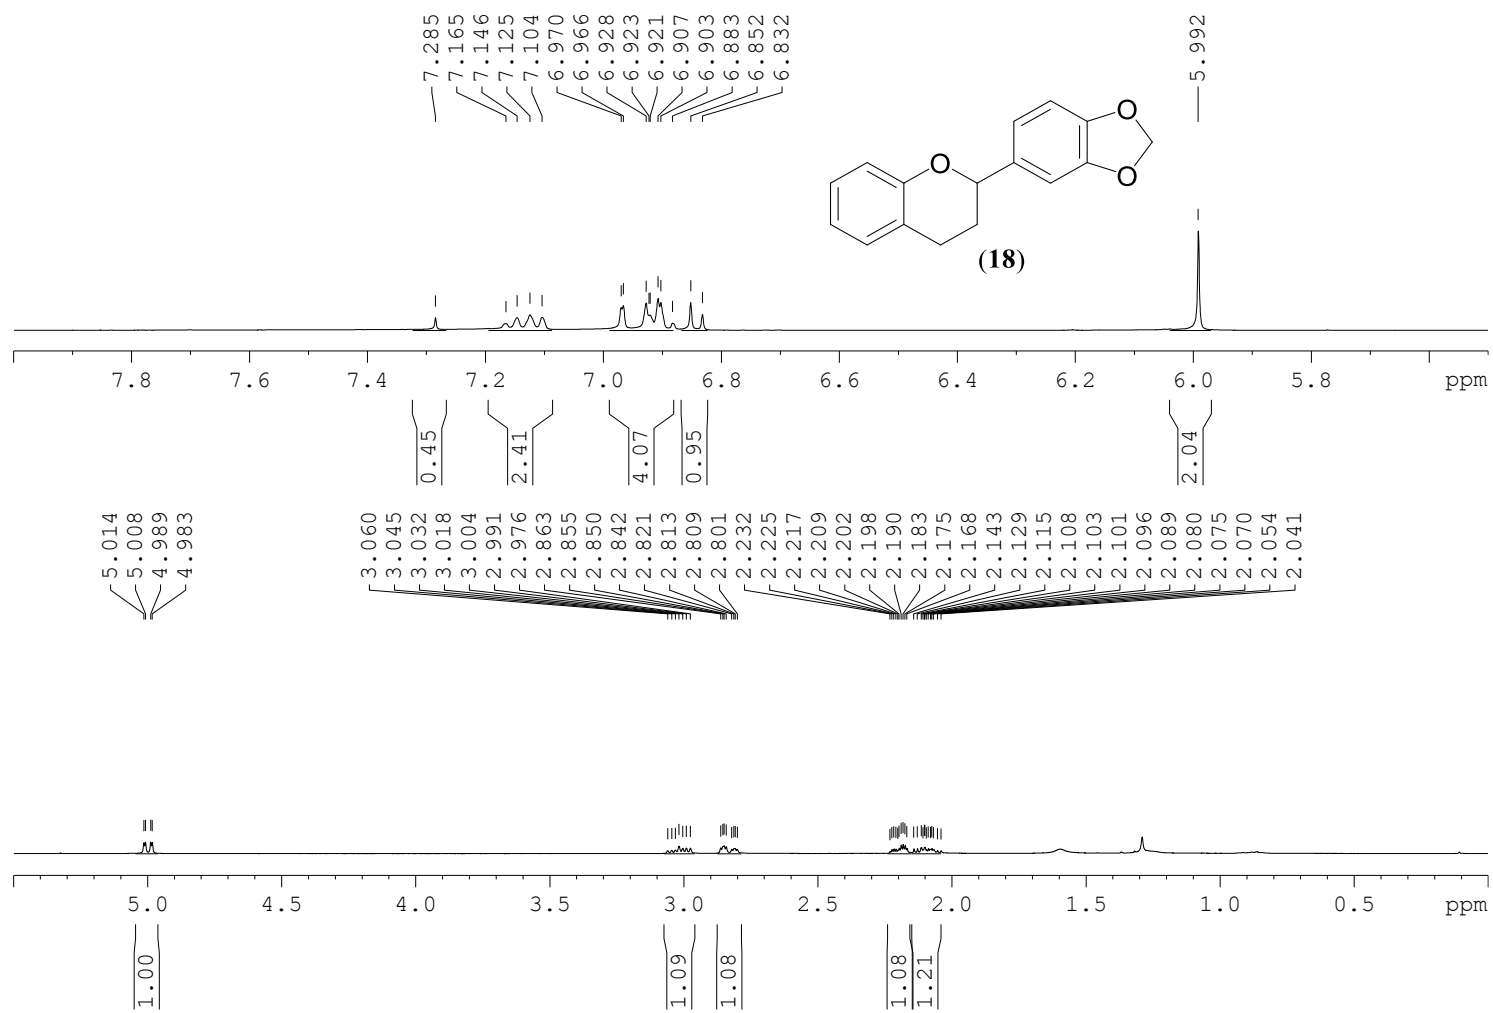

**Figure S123.** Expanded  $^1\text{H}$  NMR spectrum of **(18)** in  $\text{CDCl}_3$ .

PG-ST-02-191-01-13C

Current Data Parameters  
NAME PG-ST-02-191-01-13C  
EXPNO 12  
PROCNO 1

F2 - Acquisition Parameters

Date\_ 20211111  
Time 23.50 h  
INSTRUM Avance Neo 400  
PROBHD Z163739\_0226 (  
PULPROG zgpg30  
TD 65536  
SOLVENT CDCl3  
NS 1024  
DS 2  
SWH 27777.777 Hz  
FIDRES 0.847710 Hz  
AQ 1.1796480 sec  
RG 101  
DW 18.000 usec  
DE 6.50 usec  
TE 301.2 K  
D1 1.00000000 sec  
D11 0.03000000 sec  
TD0 1  
SFO1 100.6242384 MHz  
NUC1 13C  
P0 2.67 usec  
P1 8.00 usec  
PLW1 99.33999634 W  
SFO2 400.1316005 MHz  
NUC2 1H  
CPDPRG[2] waltz65  
PCPD2 90.00 usec  
PLW2 25.07999992 W  
PLW12 0.19815999 W  
PLW13 0.09967500 W

F2 - Processing parameters

SI 32768  
SF 100.6127685 MHz  
WDW EM  
SSB 0  
LB 1.00 Hz  
GB 0  
PC 1.40

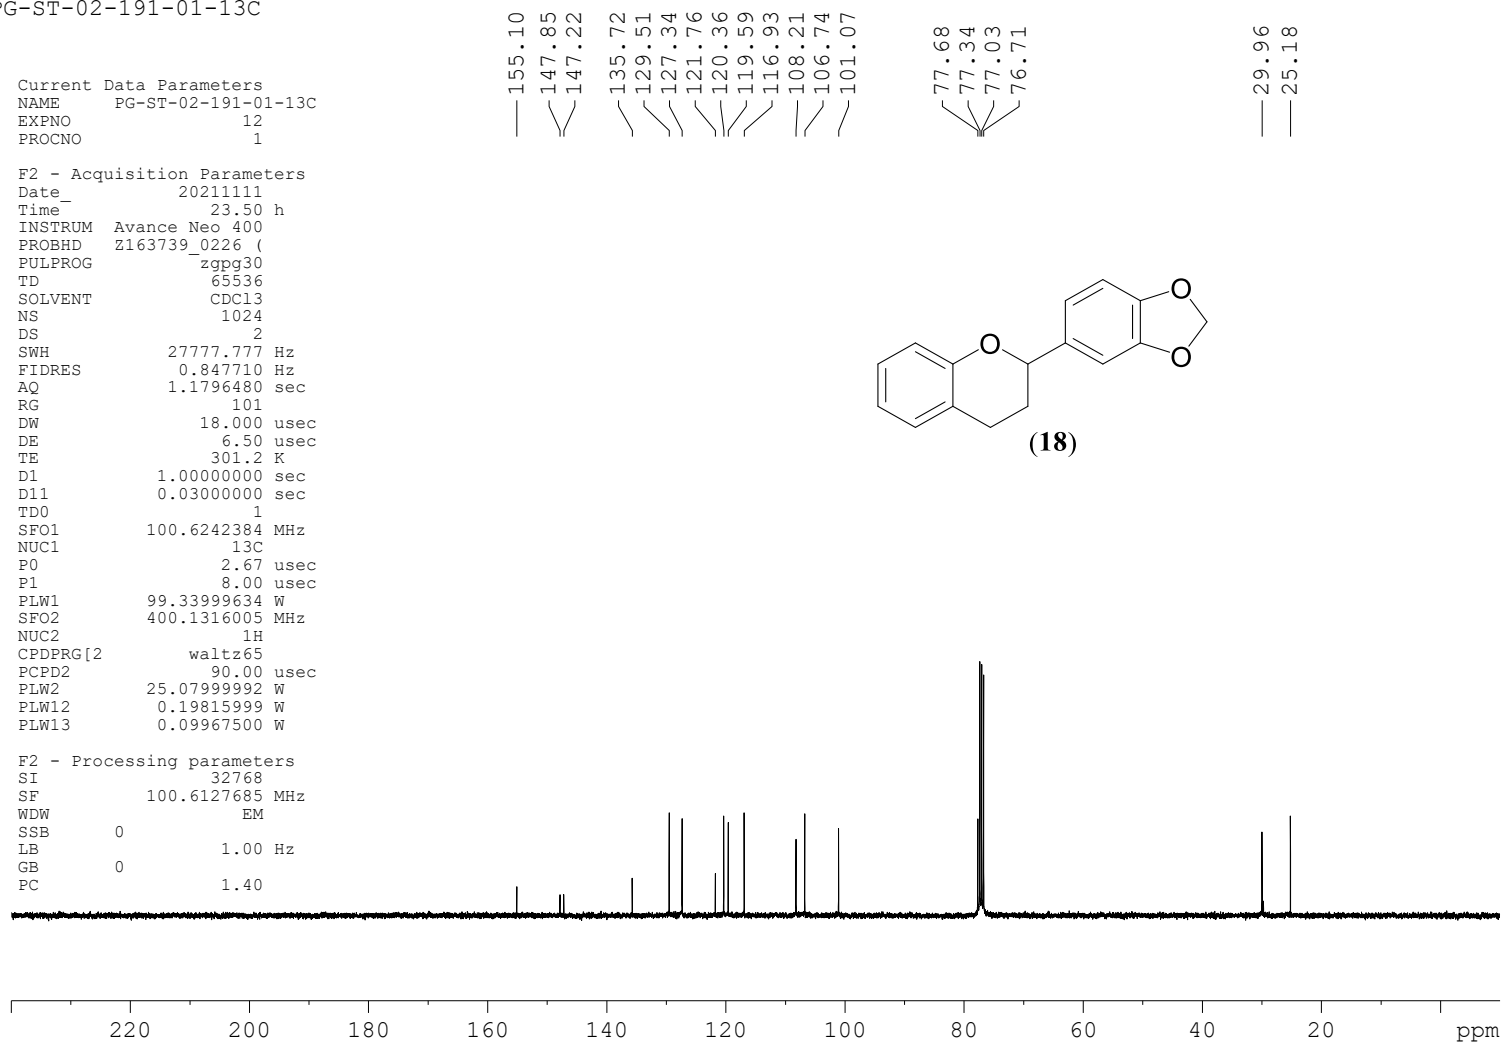

Figure S124.  $^{13}\text{C}\{^1\text{H}\}$  NMR spectrum of (18) in  $\text{CDCl}_3$ .

PG-ST-02-191-01-13C

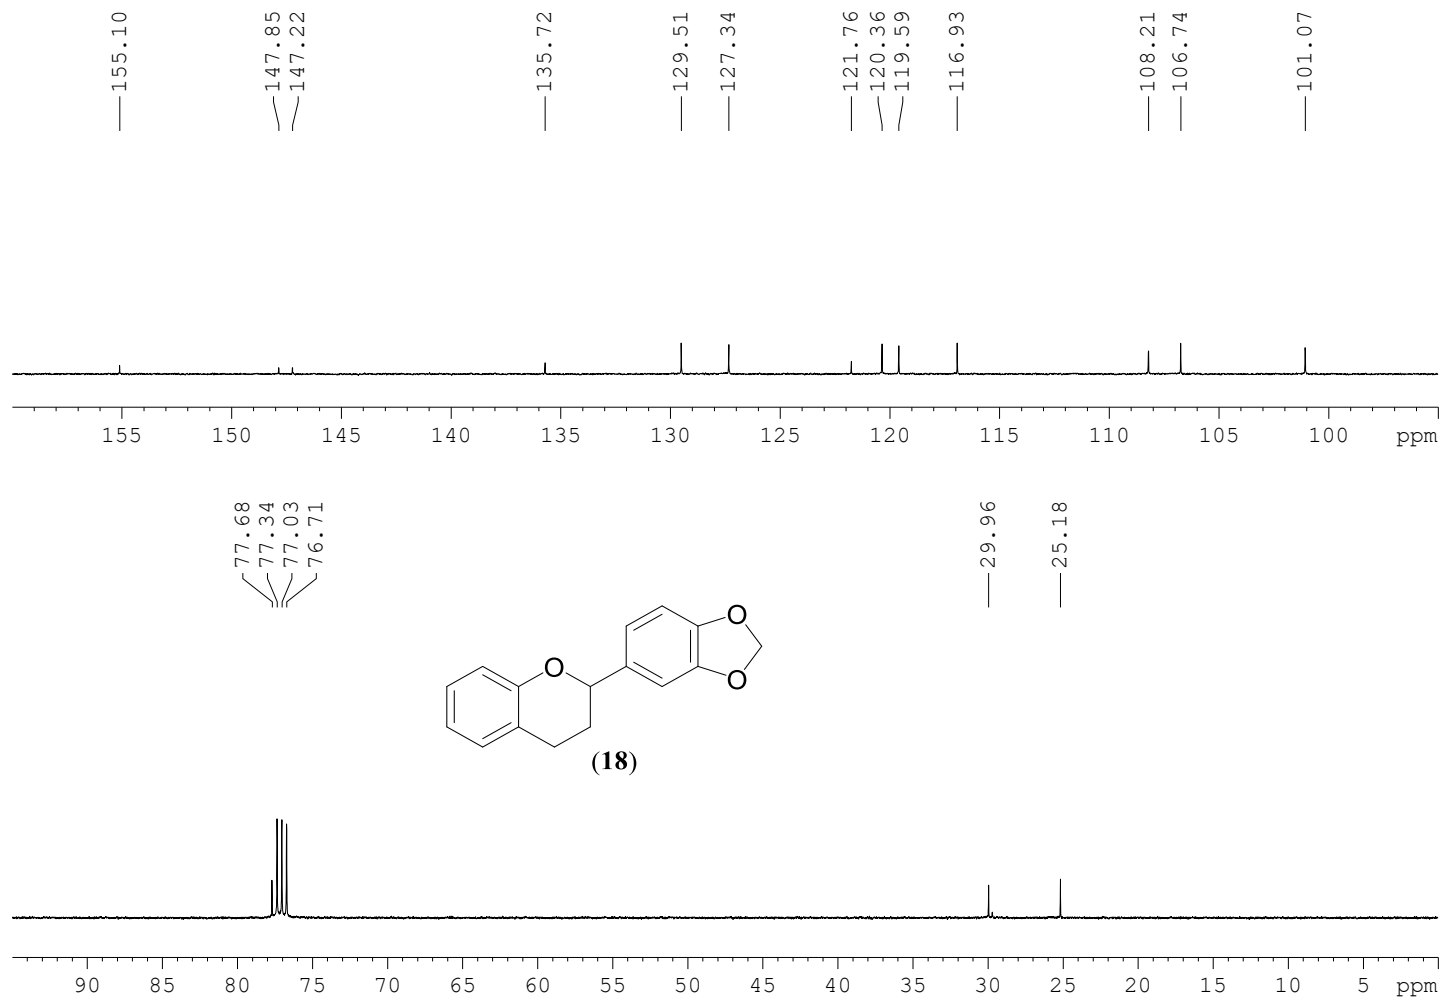

**Figure S125.** Expanded  $^{13}\text{C}\{^1\text{H}\}$  NMR spectrum of (18) in  $\text{CDCl}_3$ .

File : F:\GCMS-DATA-2021\NOV2021\PG-ST-02-191-01.D  
Operator : RM  
Acquired : 12 Nov 2021 12:45 using AcqMethod COMMONMETHOD-2010.M  
Instrument : GCMS  
Sample Name : PG-ST-02-191-01  
Misc Info :  
Vial Number: 1

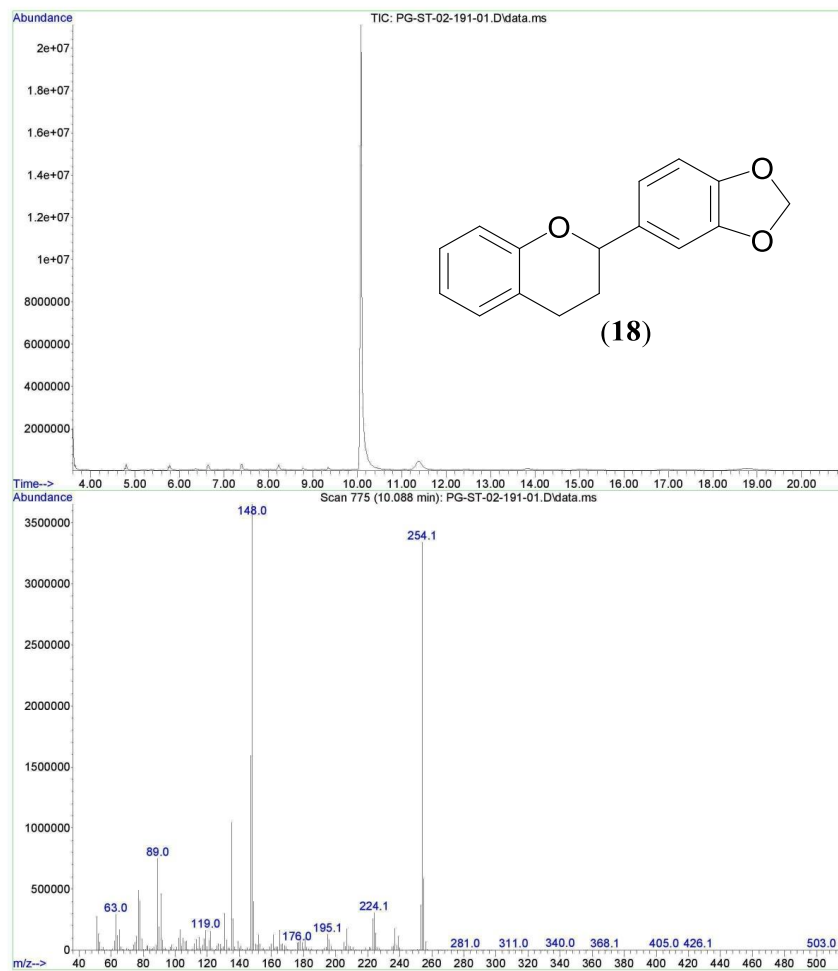

**Figure S126.** GCMS trace in EtOAc of (18) showing the M<sup>+</sup> peak at  $m/z$  254.

Document: CHNS16112021 (varioMICRO) from: --,--,-- (modified)

SP18022016  
varioMICRO CHNS  
serial number: 15154051

Graphic report

| No. | Weight [mg] | Name           | Method     | N Area | C Area | H Area | N [%] | C [%] | H [%] | Date       | Time  | Info |
|-----|-------------|----------------|------------|--------|--------|--------|-------|-------|-------|------------|-------|------|
| 62  | 0.7400      | PG-ST-02-191-1 | 2mgChem80s | 2 848  | 15 605 | 4 410  | 0.00  | 76.00 | 4.899 | 16-11-2021 | 21:45 |      |

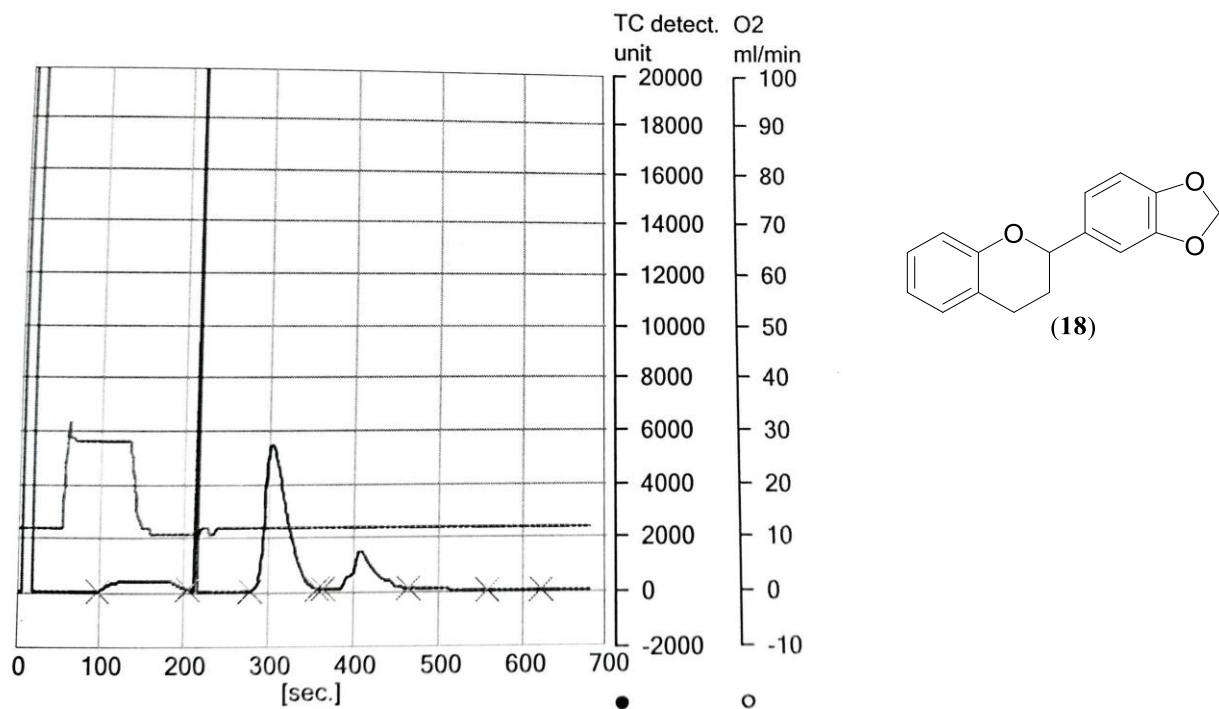

Figure S127. Elemental analysis data (18)..

PG-ST-02-199-02-1H-1

Current Data Parameters  
NAME PG-ST-02-199-02-1H-1  
EXPNO 1  
PROCNO 1

F2 - Acquisition Parameters  
Date\_ 20211115  
Time\_ 22.05 h  
INSTRUM Avance  
PROBHD Z163739\_0237 (  
PULPROG zg30  
TD 51724  
SOLVENT CDCl3  
NS 16  
DS 0  
SWH 8620.689 Hz  
FIDRES 0.333334 Hz  
AQ 2.9999919 sec  
RG 101  
DW 58.000 usec  
DE 13.14 usec  
TE 299.4 K  
D1 1.00000000 sec  
TD0 1  
SFO1 400.3024719 MHz  
NUC1 1H  
P0 2.67 usec  
P1 8.00 usec  
PLW1 21.61000061 W

F2 - Processing parameters  
SI 65536  
SF 400.3000000 MHz  
WDW EM  
SSB 0  
LB 0.30 Hz  
GB 0  
PC 1.00

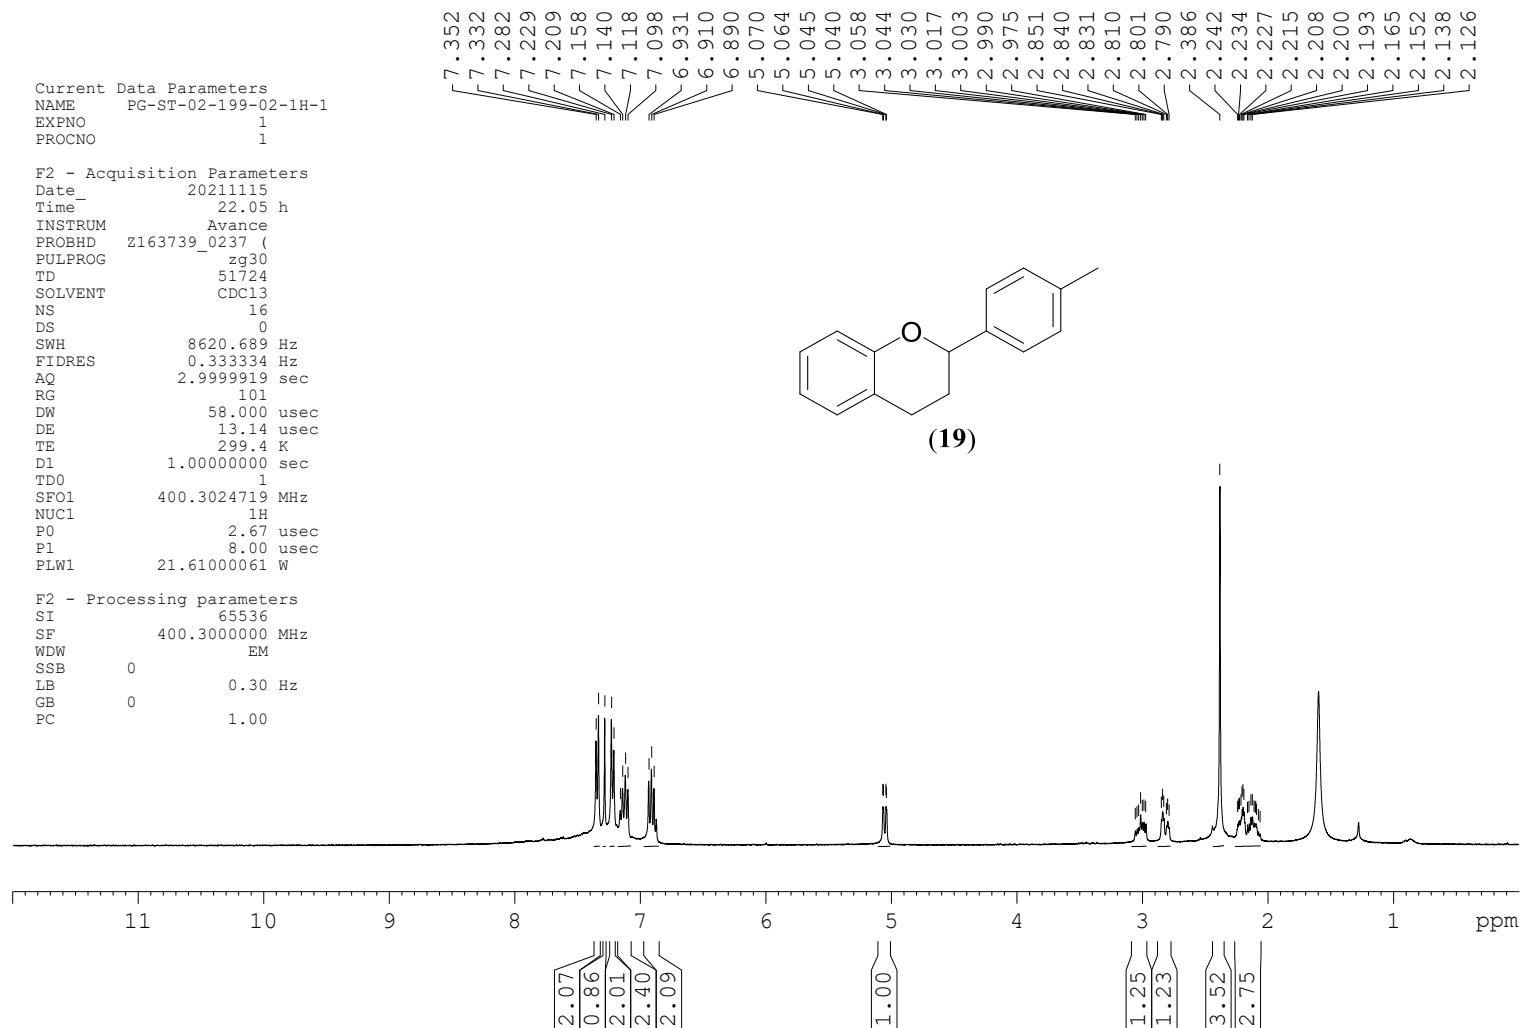

Figure S128.  $^1\text{H}$  NMR spectrum of (19) in  $\text{CDCl}_3$ .

PG-ST-02-199-02-1H-1

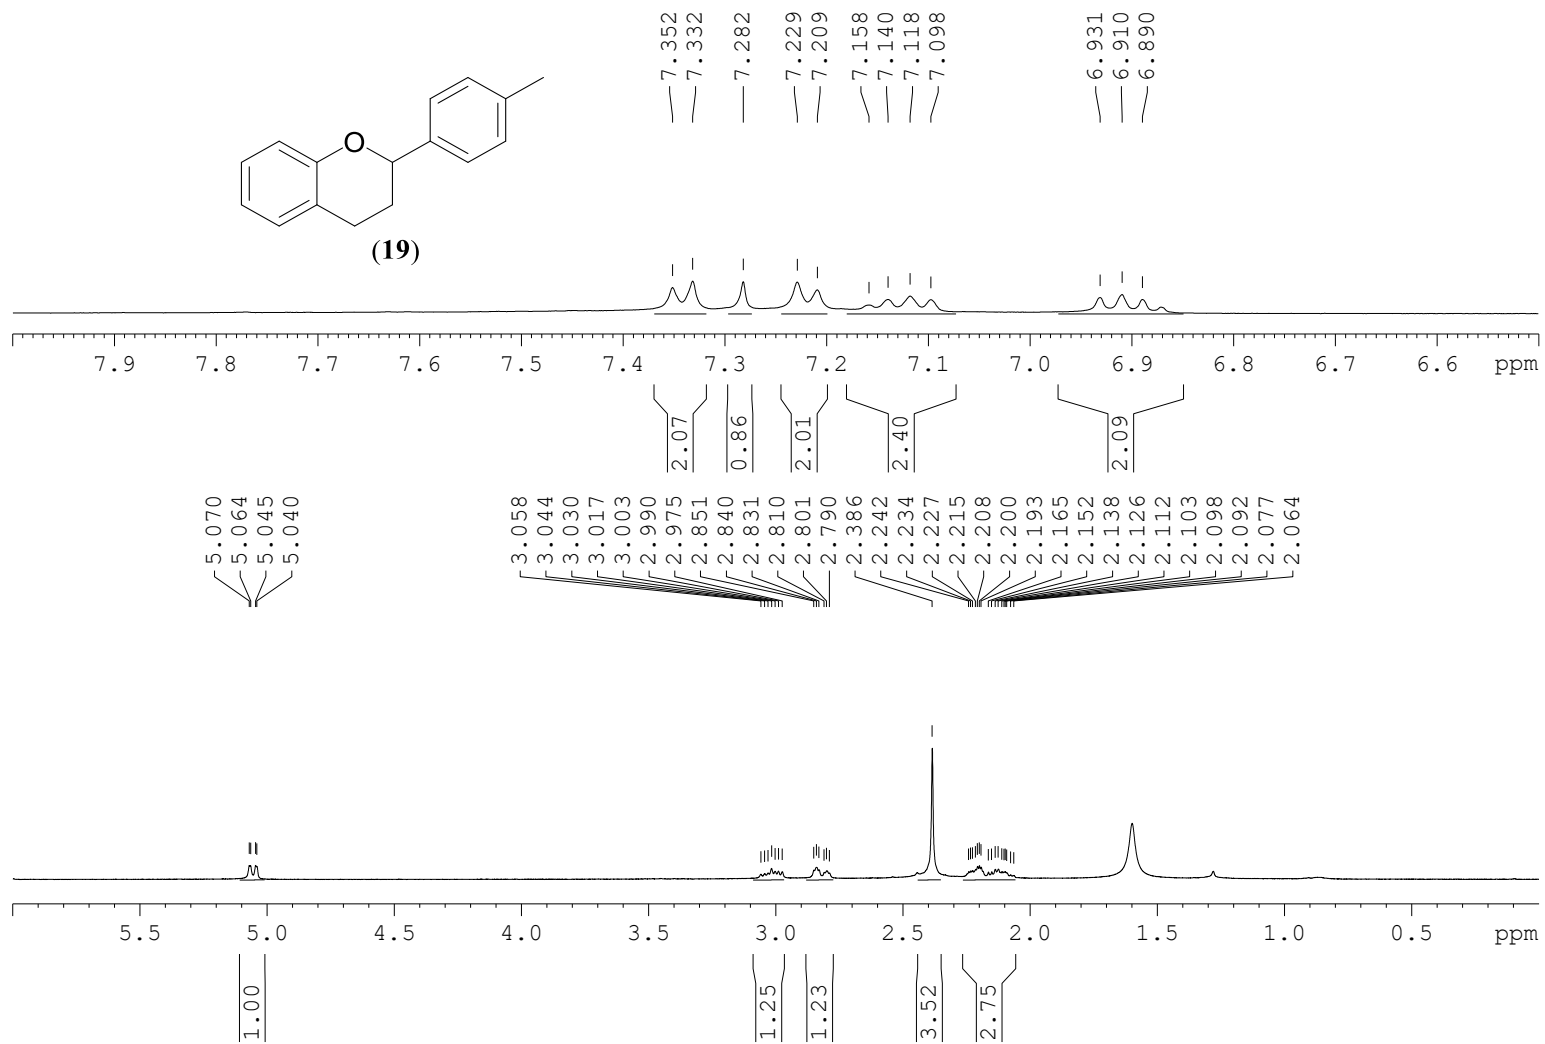

**Figure S129.** Expanded  $^1\text{H}$  NMR spectrum of (19) in  $\text{CDCl}_3$ .

PG-ST-02-199-02-13C-1

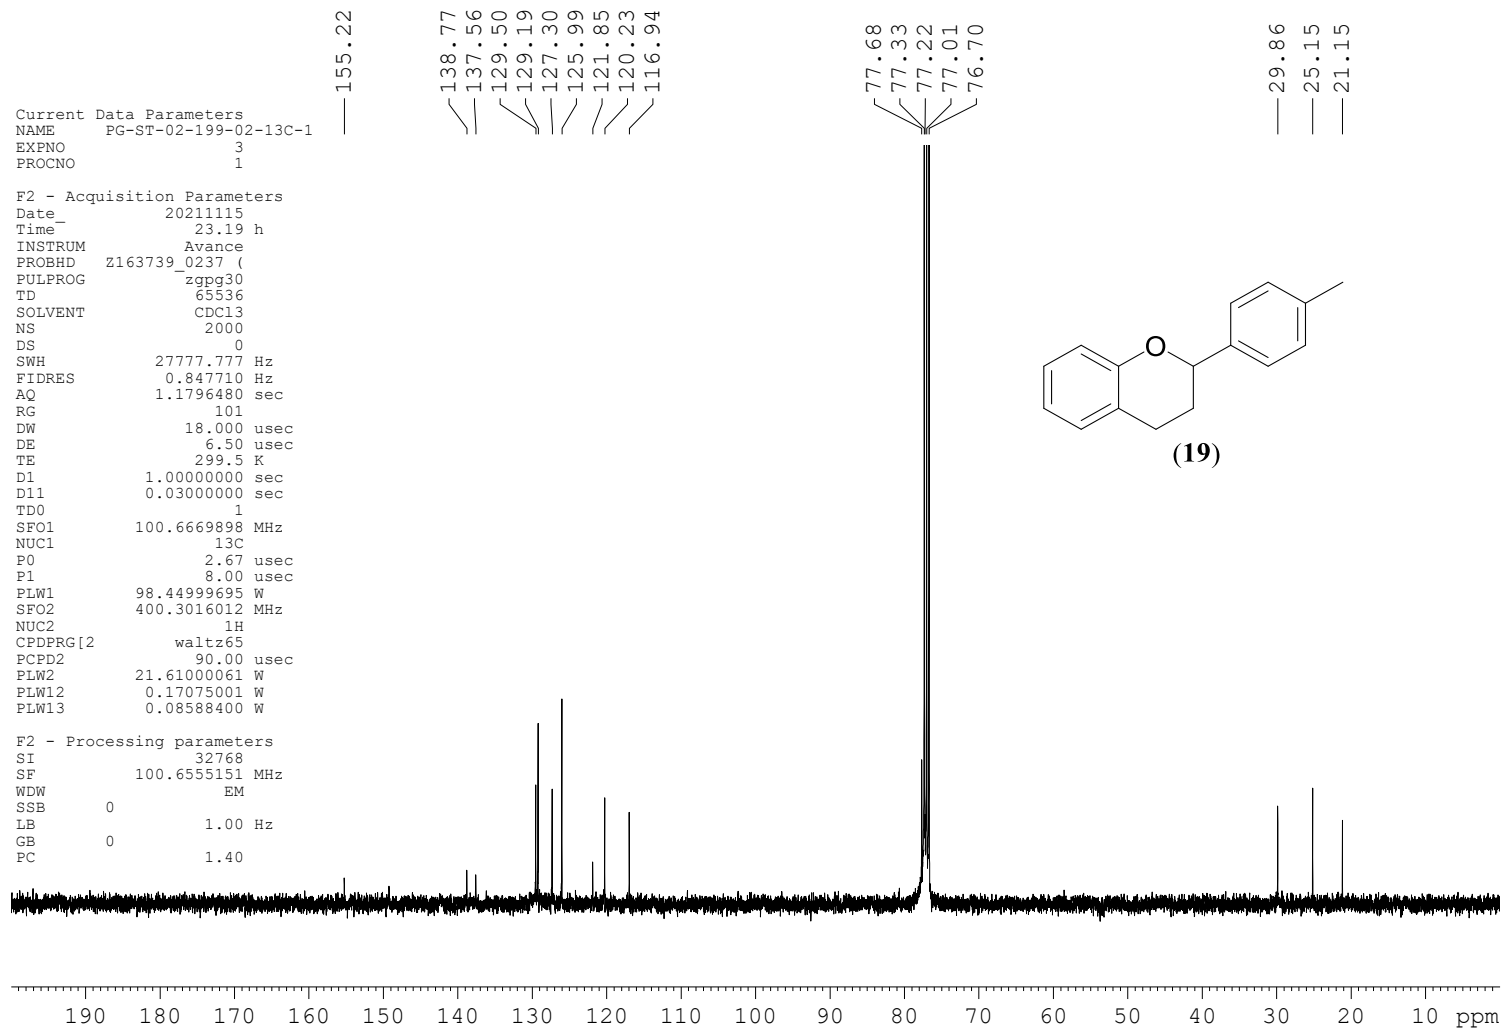

Figure S130.  $^{13}\text{C}\{^1\text{H}\}$  NMR spectrum of (19) in  $\text{CDCl}_3$ .



PG-ST-02-199-02-13C-1

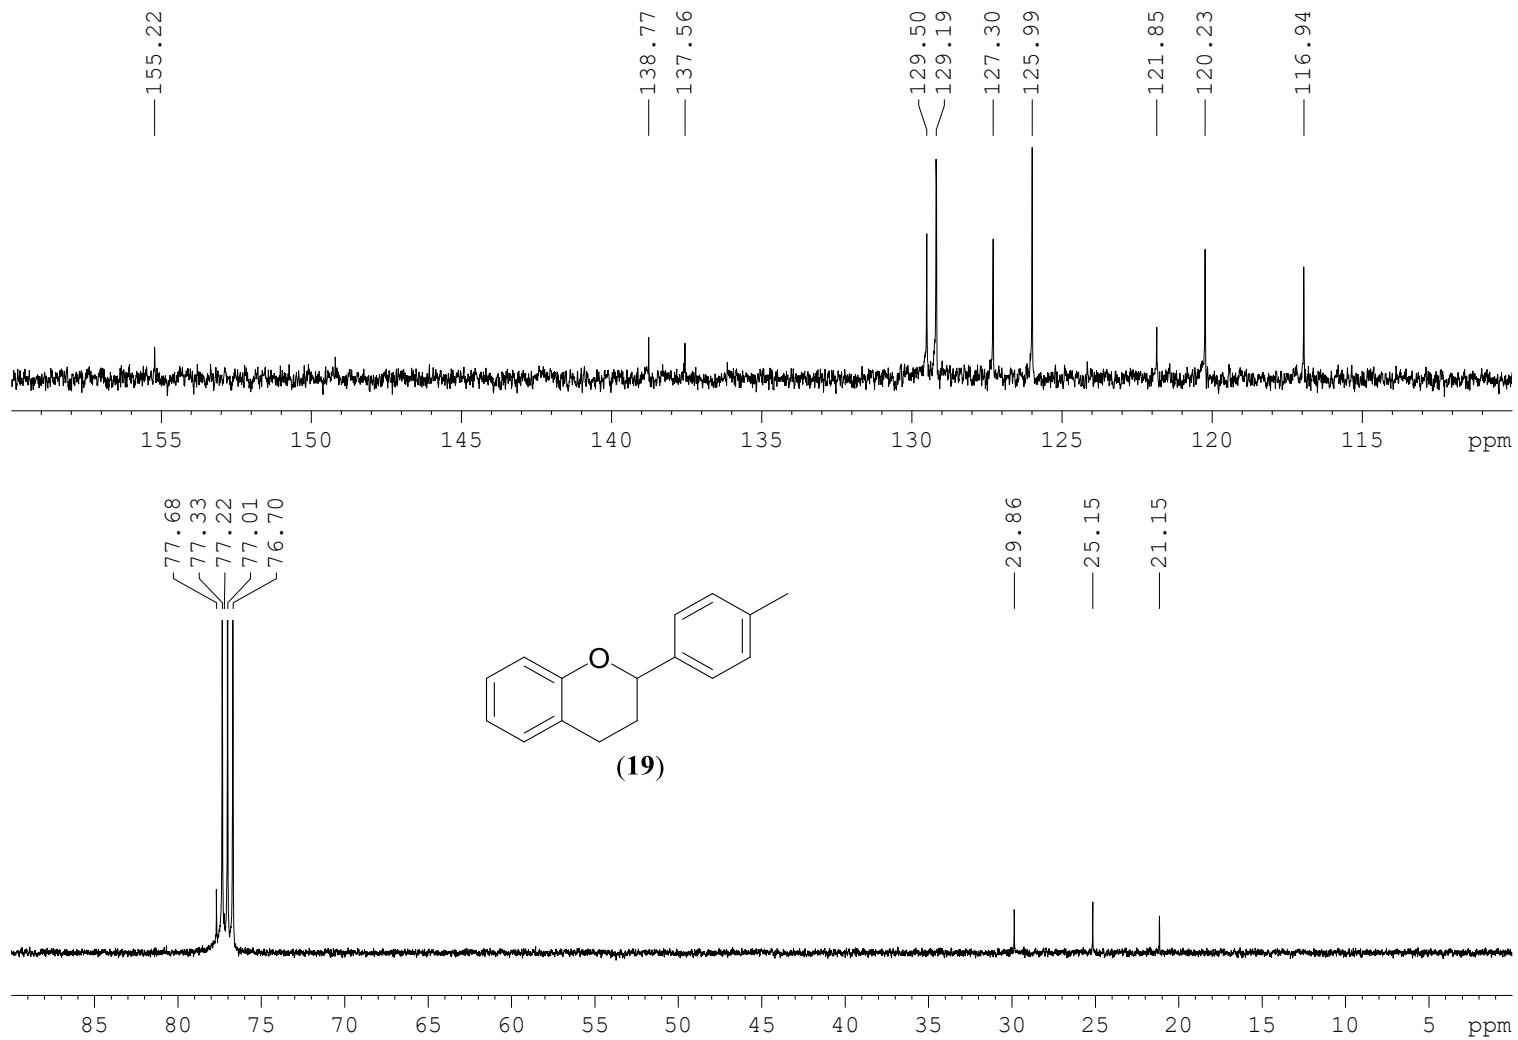

Figure S131. Expanded  $^{13}\text{C}\{^1\text{H}\}$  NMR spectrum of (19) in  $\text{CDCl}_3$ .

File : F:\GCMS-DATA-2021\NOV2021\PG-ST-02-199-3.D  
Operator : RM  
Acquired : 16 Nov 2021 12:35 using AcqMethod COMMONMETHOD-2010.M  
Instrument : GCMS  
Sample Name: PG-ST-02-199-3  
Misc Info :  
Vial Number: 1

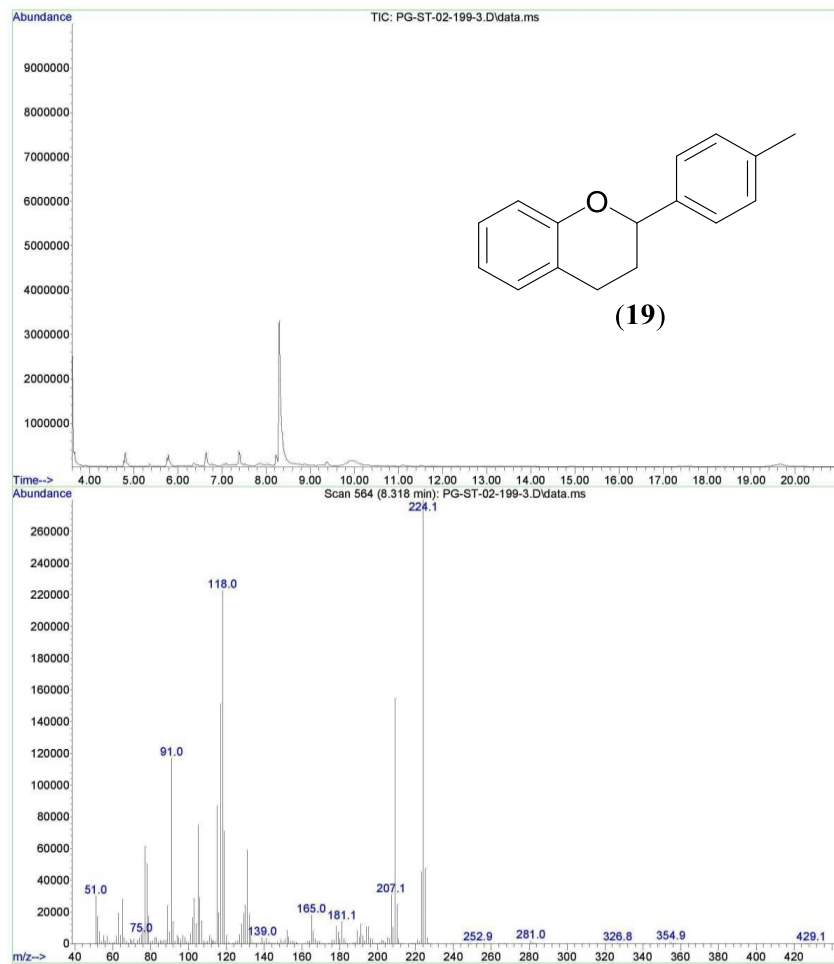

**Figure S132.** GCMS trace in EtOAc of (19) showing the  $M^+$  peak at  $m/z$  224.

| No. | Weight [mg] | Name           | Method     | N Area | C Area | H Area | N [%] | C [%] | H [%] | Date       | Time  | Info |
|-----|-------------|----------------|------------|--------|--------|--------|-------|-------|-------|------------|-------|------|
| 43  | 1.0200      | PG-ST-02-199-1 | 2mgChem80s | 2 855  | 24 714 | 8 632  | 0.00  | 84.86 | 8.161 | 24-01-2022 | 18:45 | Snp  |

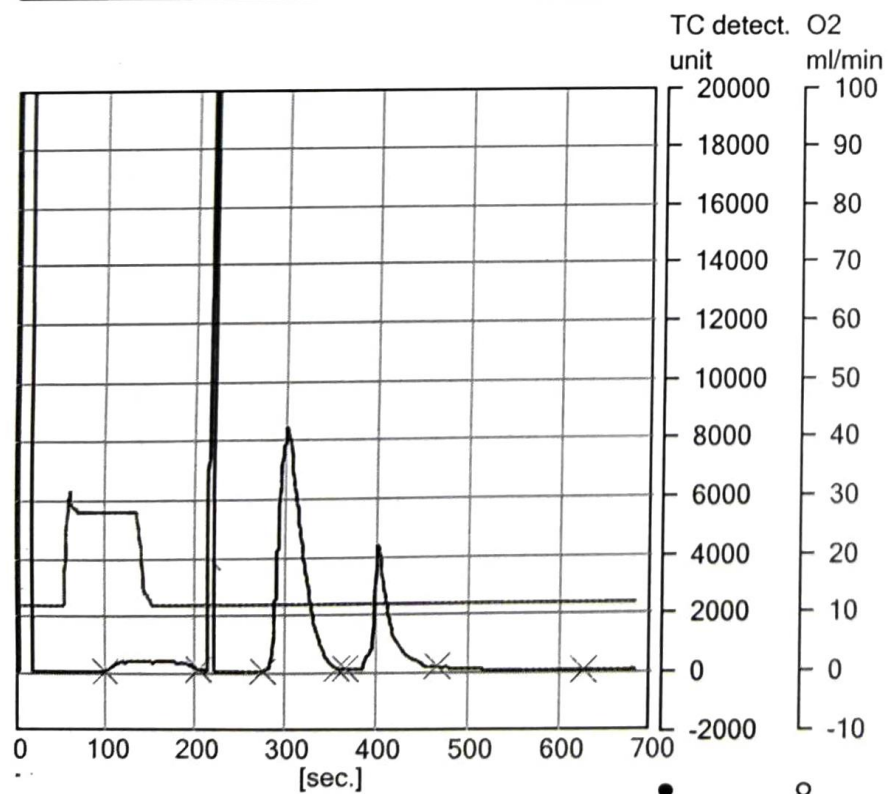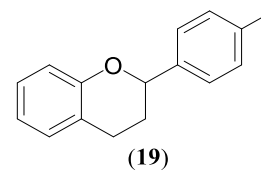

**Figure S133.** Elemental analysis data (19).

PG-ST-02-198-01-1H

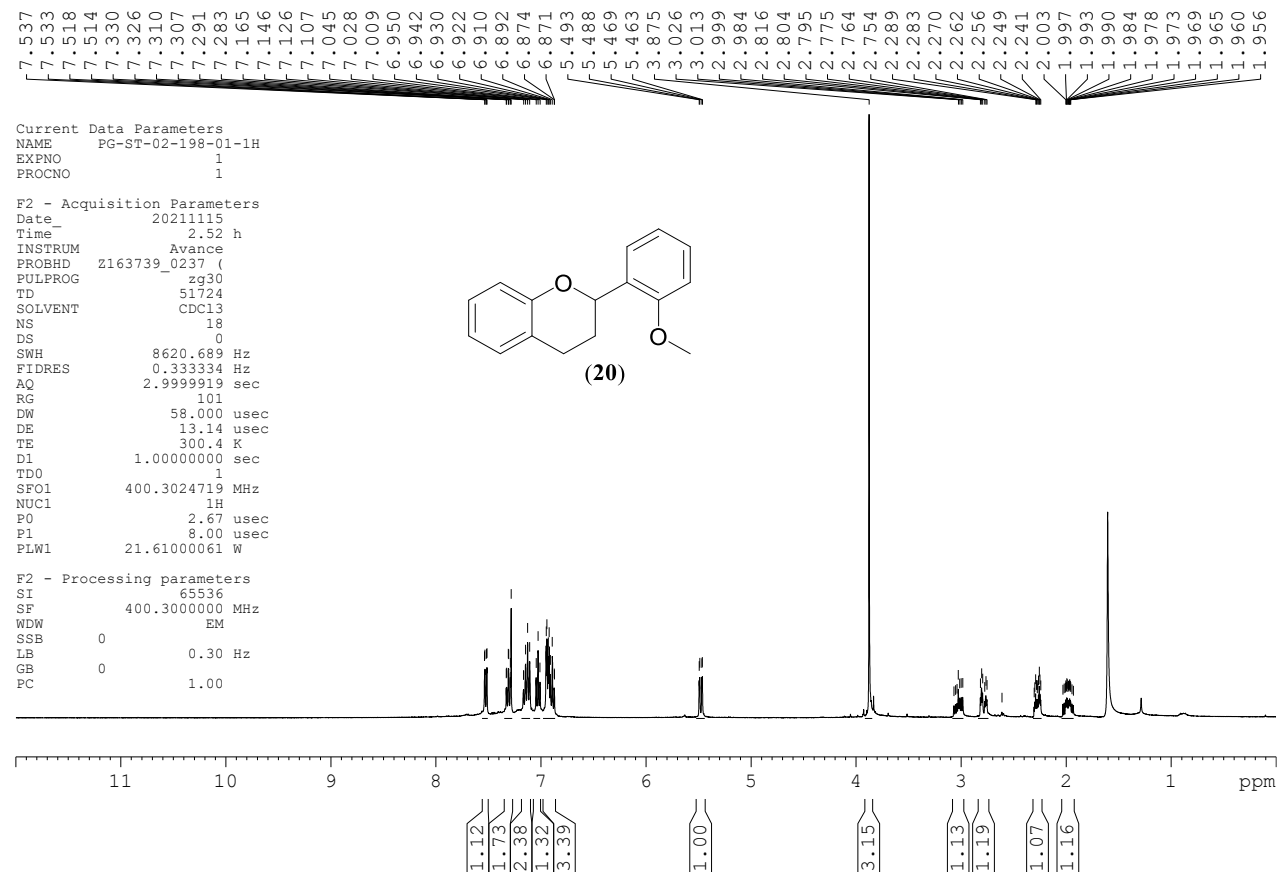

Figure S134. <sup>1</sup>H NMR spectrum of (20) in CDCl<sub>3</sub>.

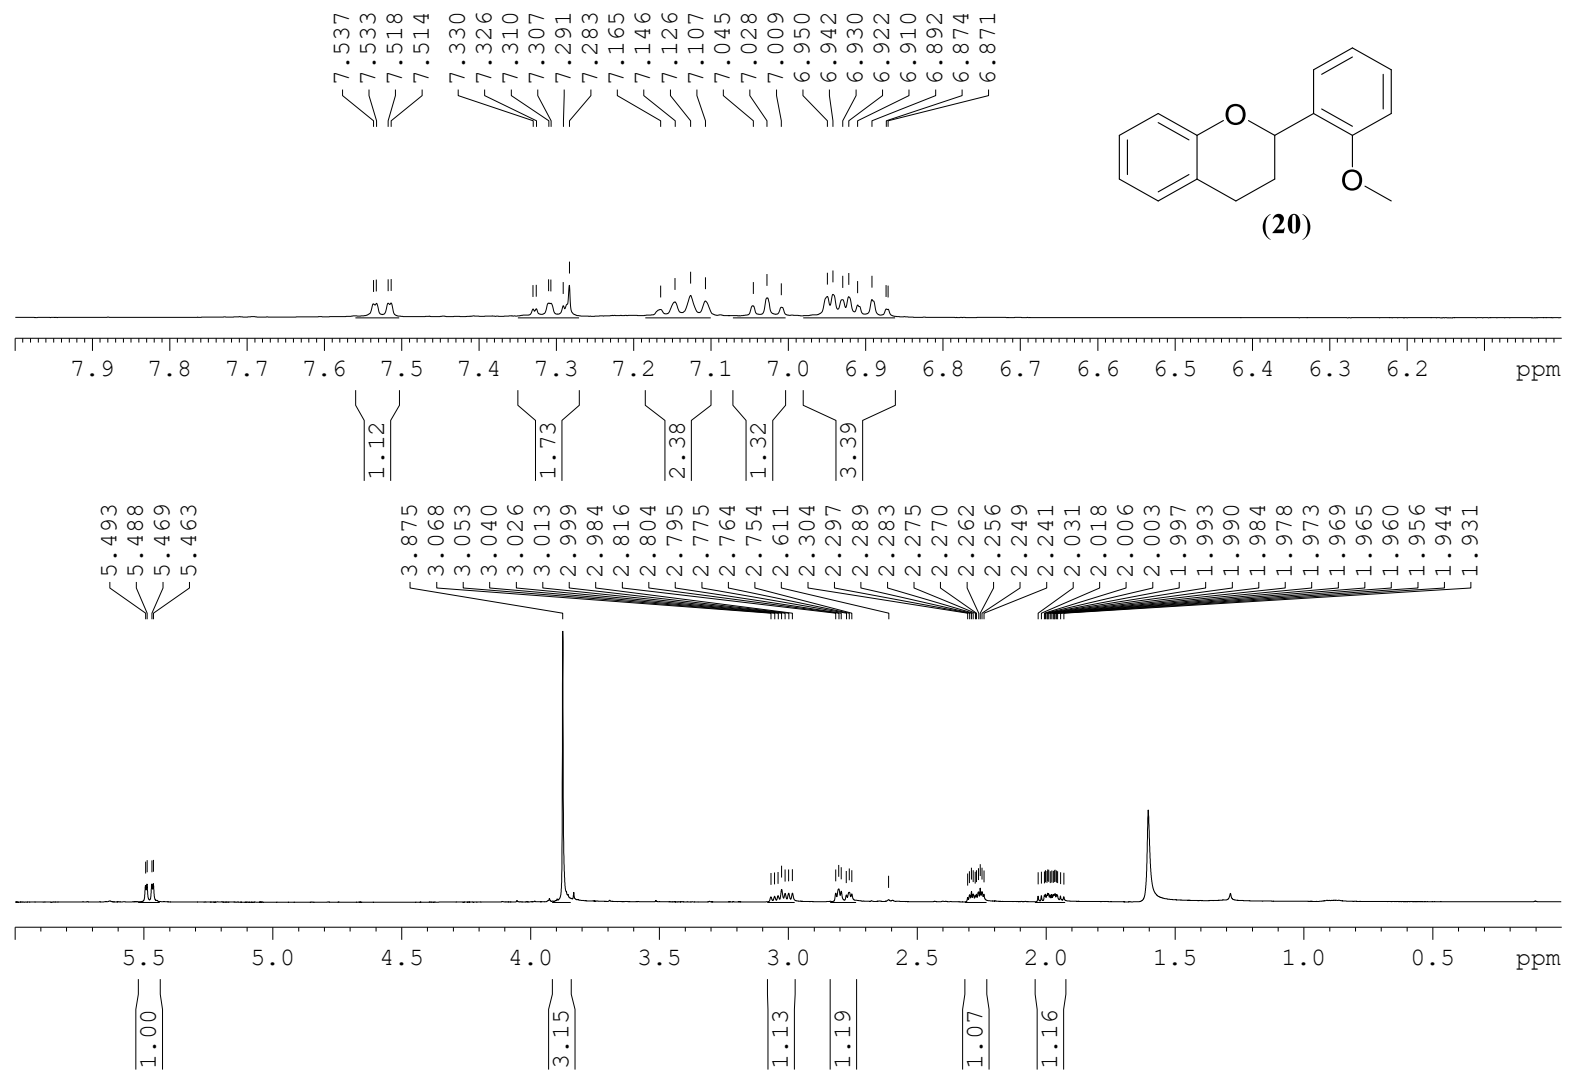

**Figure S135.** Expanded  $^1\text{H}$  NMR spectrum of (20) in  $\text{CDCl}_3$ .

PG-ST-02-198-01-13C

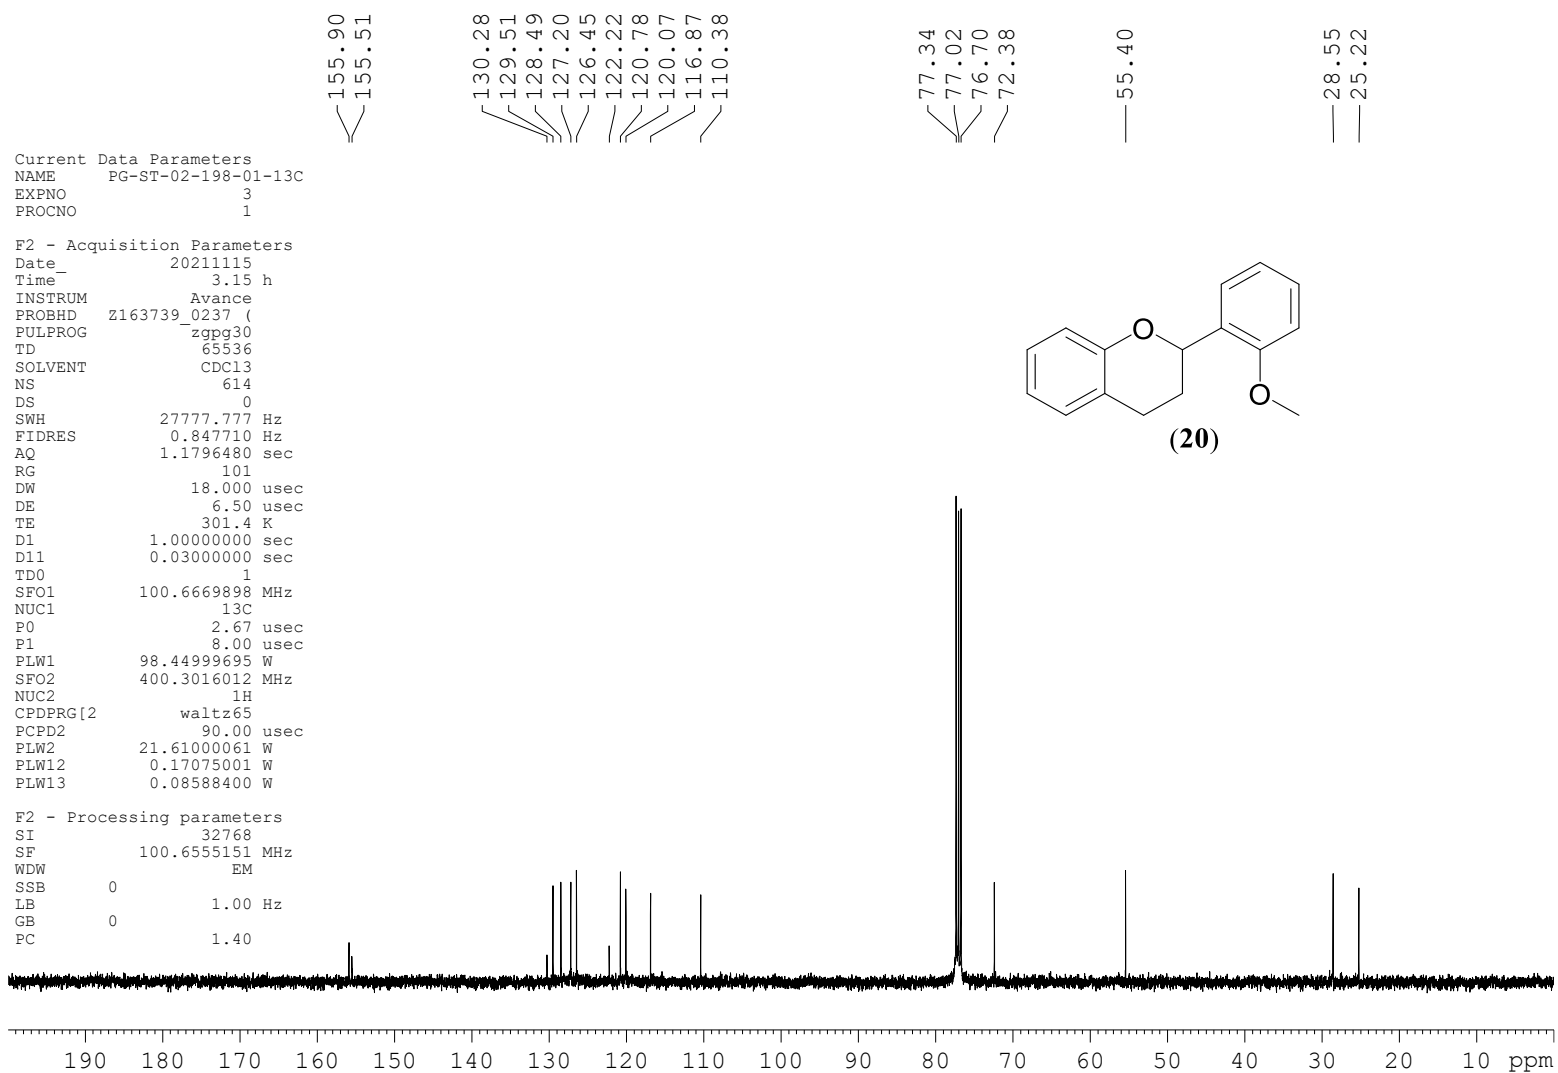

Figure S136.  $^{13}\text{C}\{^1\text{H}\}$  NMR spectrum of (20) in  $\text{CDCl}_3$ .

PG-ST-02-198-01-13C

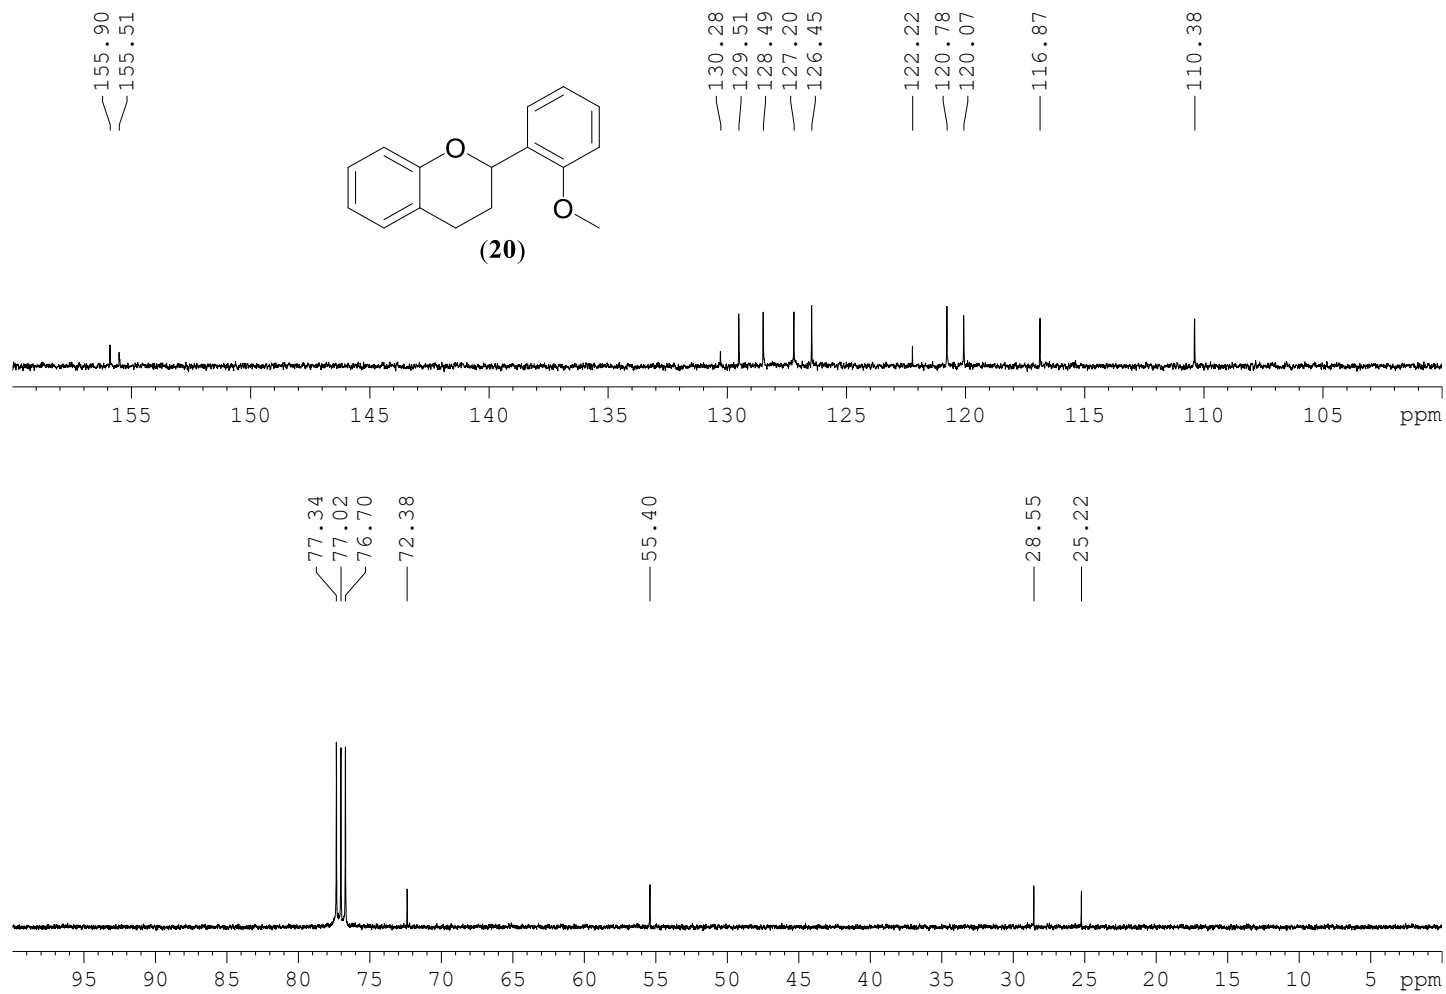

**Figure S137.** Expanded  $^{13}\text{C}\{^1\text{H}\}$  NMR spectrum of (20) in  $\text{CDCl}_3$ .

File : F:\GCMS-DATA-2021\NOV2021\PG-ST-02-198-1.D  
Operator : RM  
Acquired : 15 Nov 2021 15:57 using AcqMethod COMMONMETHOD-2010.M  
Instrument : GCMS  
Sample Name : PG-ST-02-198-1  
Misc Info :  
Vial Number : 2

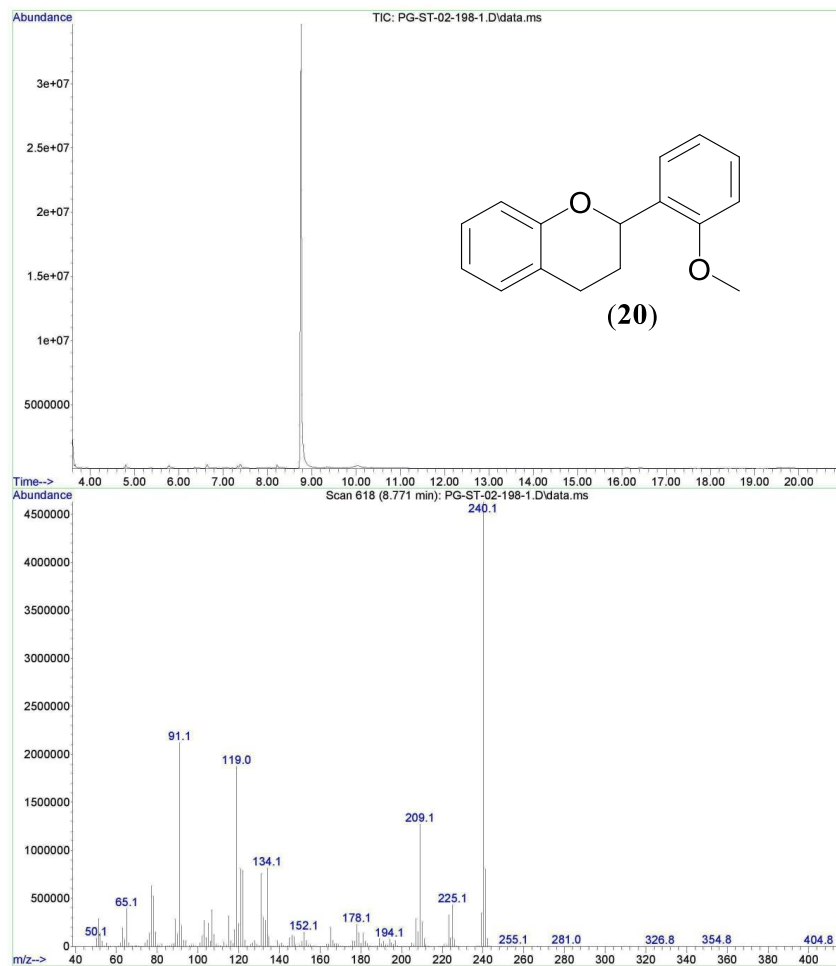

**Figure S138.** GCMS trace in EtOAc of (20) showing the  $M^+$  peak at  $m/z$  240.



| No. | Weight [mg] | Name         | Method     | N Area | C Area | H Area | N [%] | C [%] | H [%] | Date       | Time  | Info |
|-----|-------------|--------------|------------|--------|--------|--------|-------|-------|-------|------------|-------|------|
| 40  | 1.3260      | PG-ST-02-198 | 2mgChem80s | 2 863  | 30 109 | 9 561  | 0.00  | 79.77 | 7.156 | 24-01-2022 | 18:10 | Snp  |

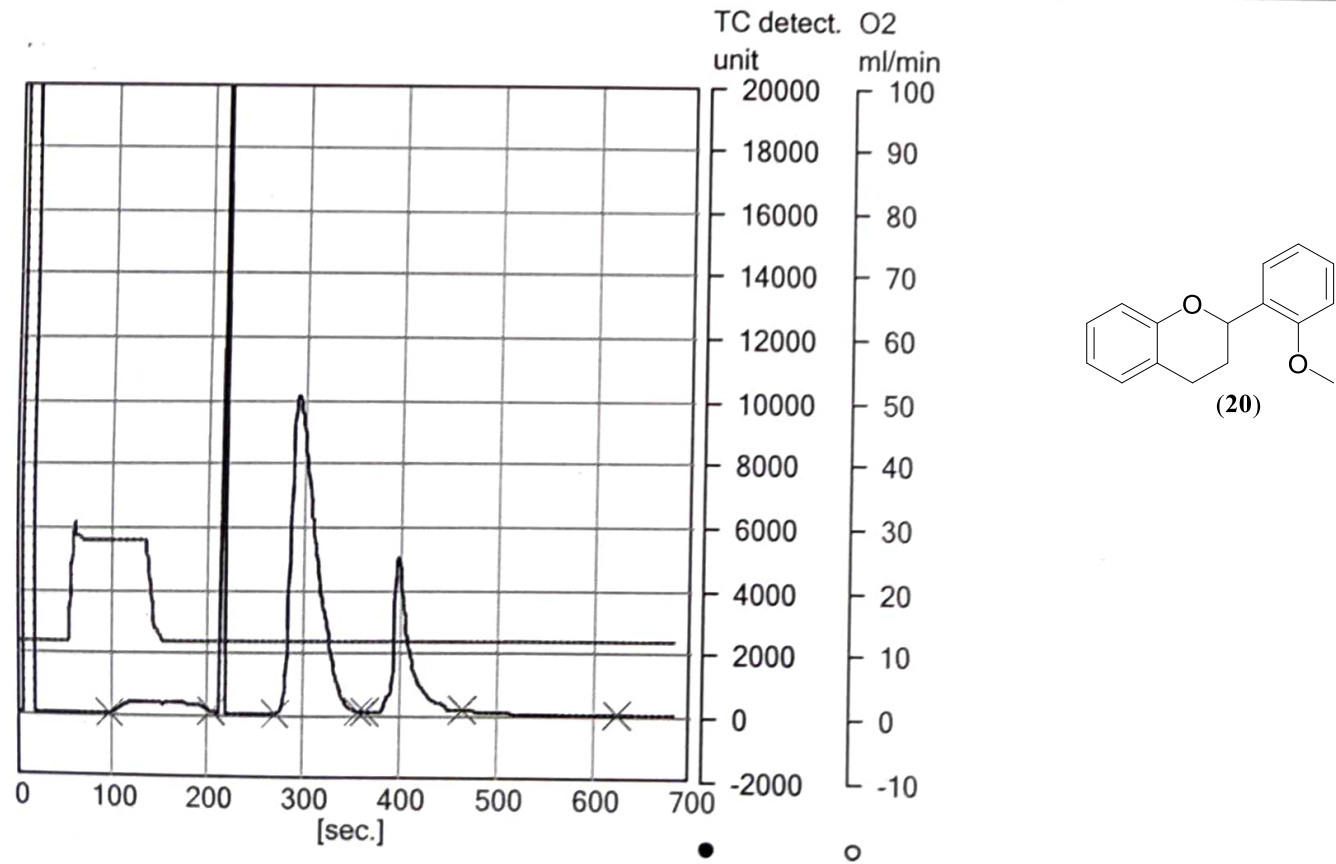

**Figure S139.** Elemental analysis data (20).

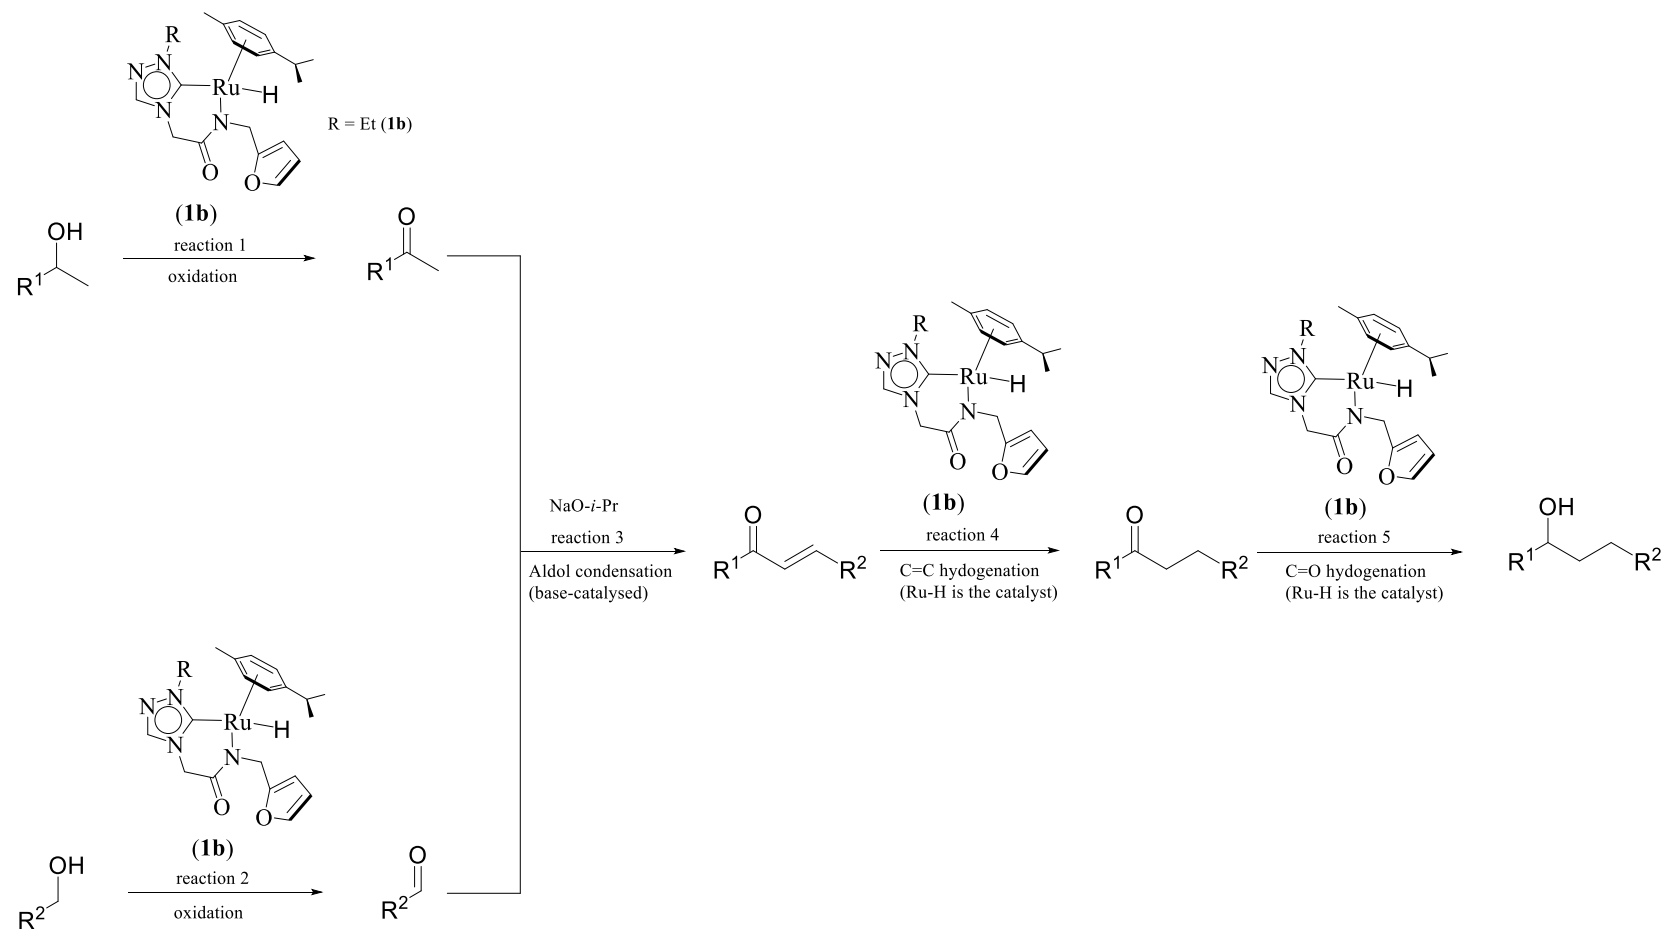

**Scheme S1.** One pot tandem  $\beta$ -alkylation reaction of secondary alcohol involving five sequential reactions.

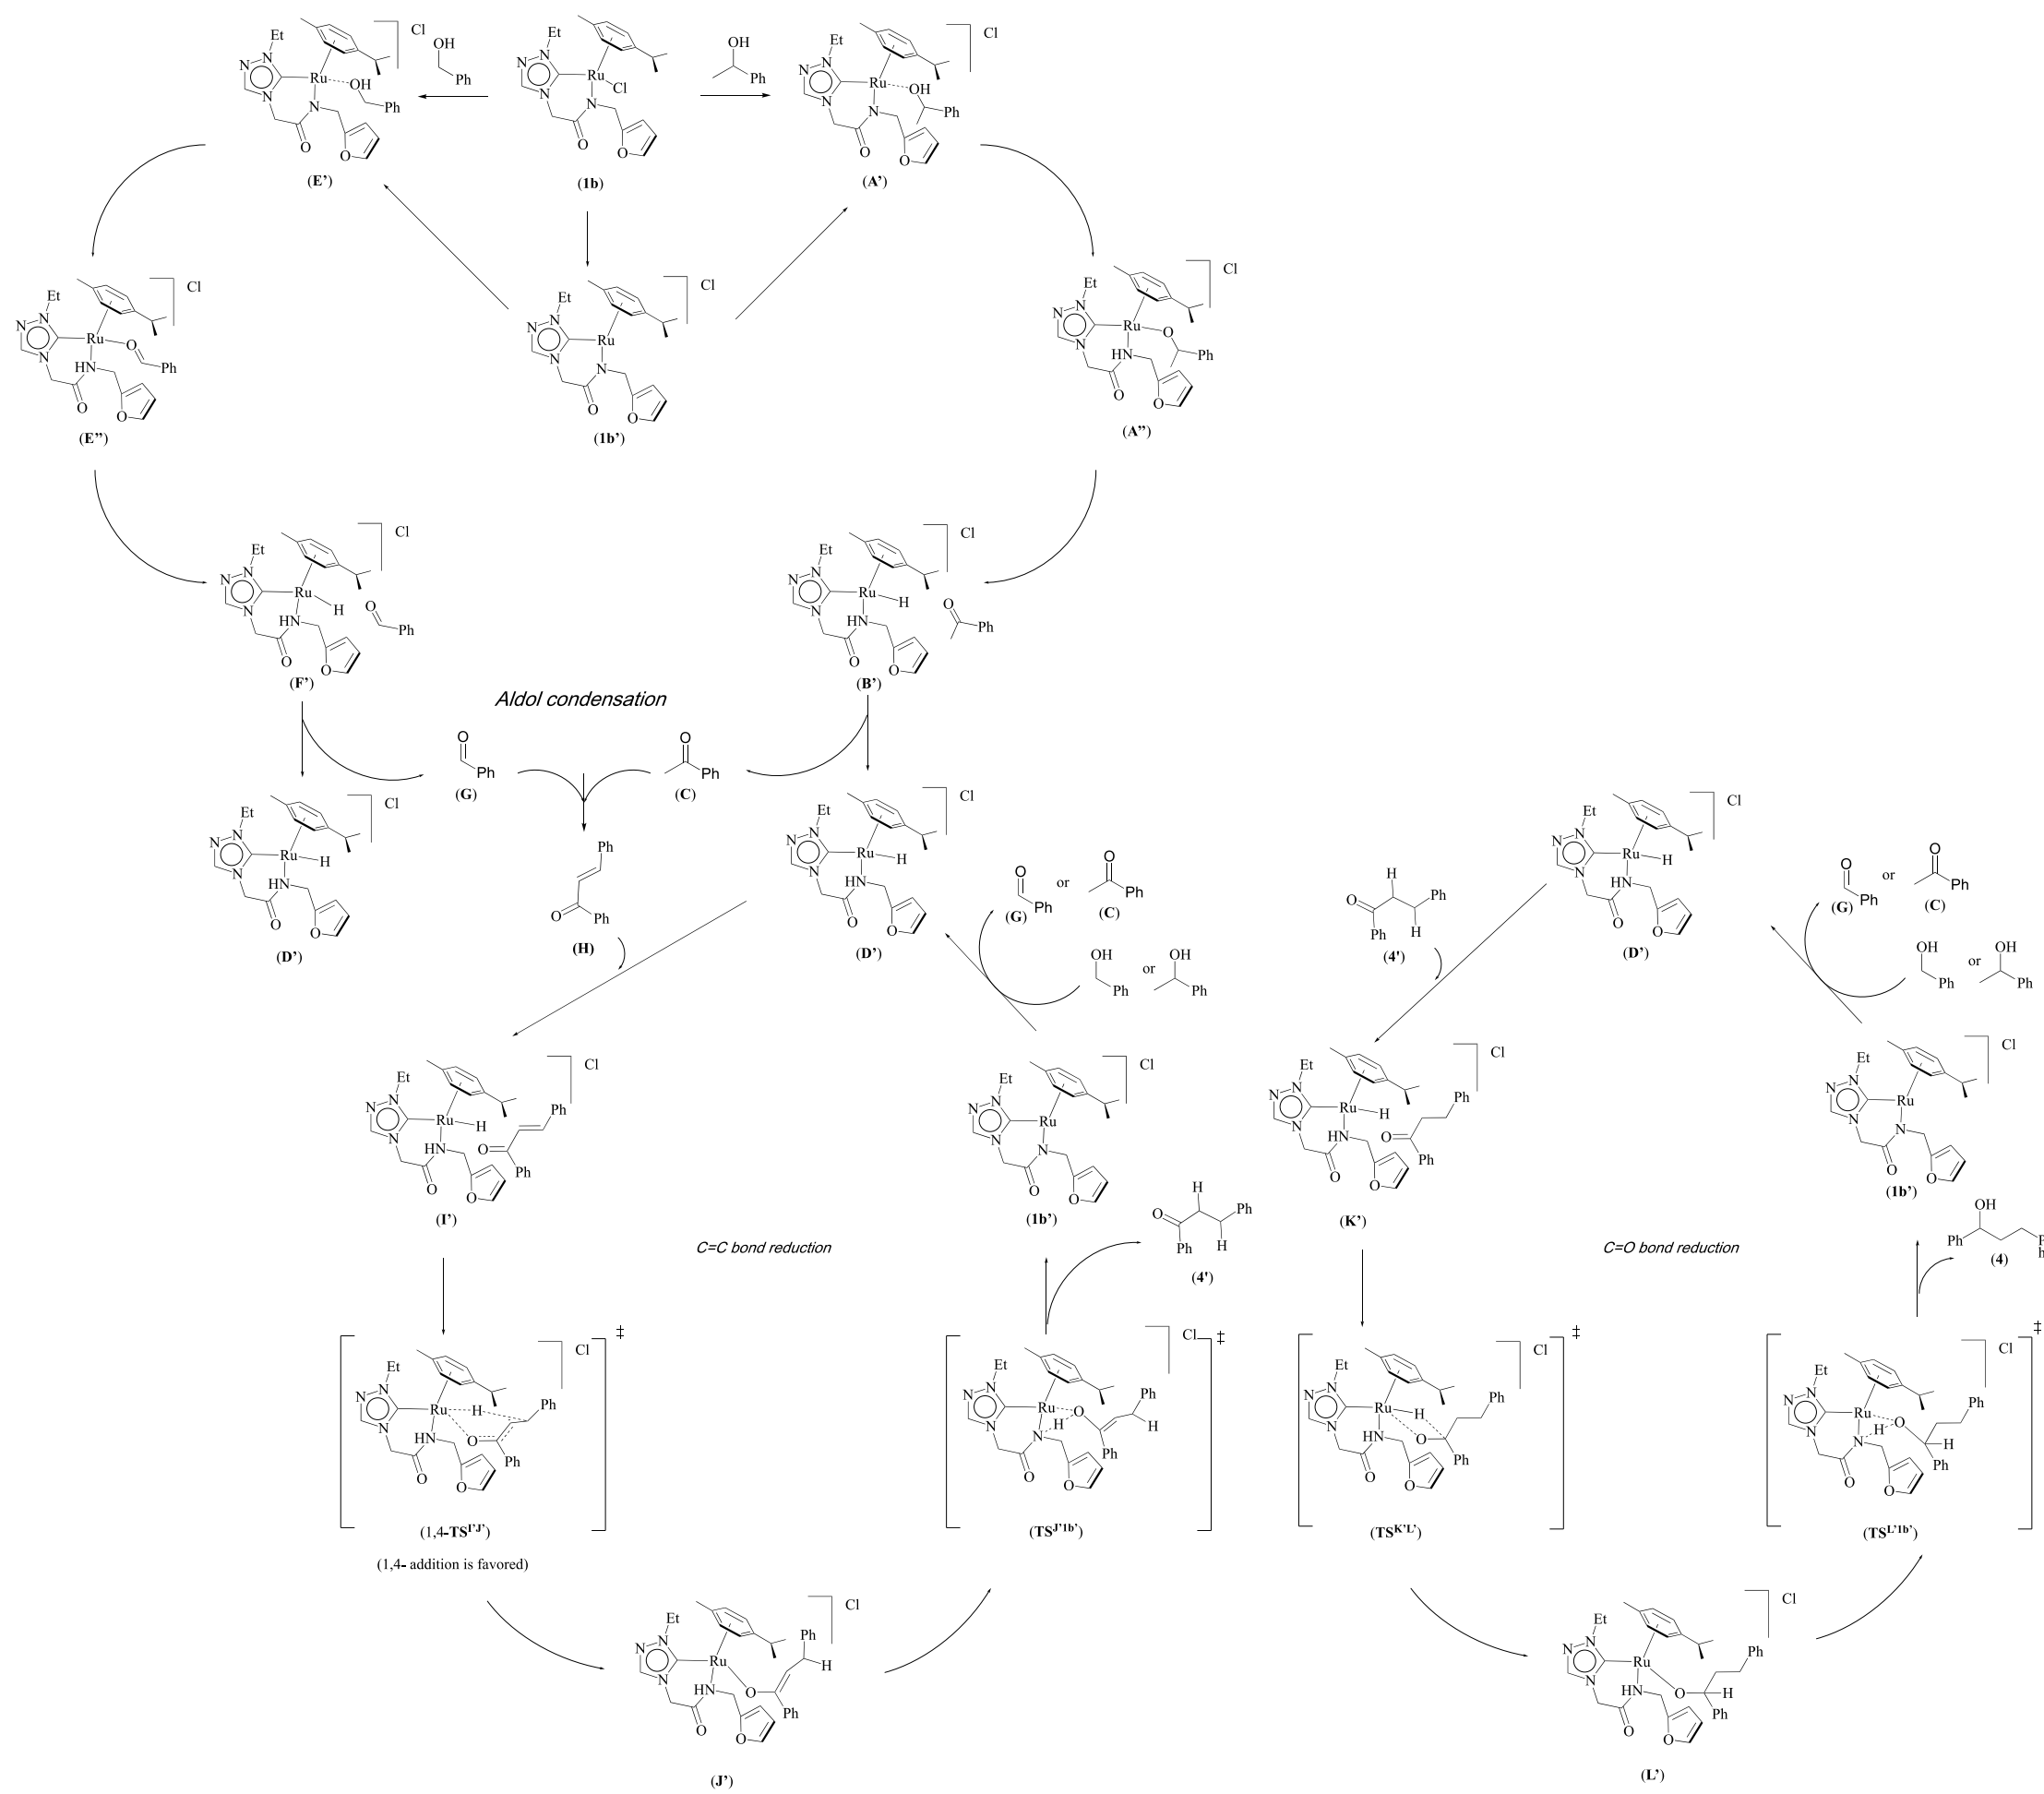

**Scheme S2.** A proposed ionic mechanistic pathway for the Ru-NHC (**1b**) catalyzed one pot tandem  $\beta$ -alkylation reaction for representative substrates namely 1-phenylethanol and benzyl alcohol is shown.

**Table S1.** X-ray crystallographic data for Ru–NHC complexes (**1–3b**).

| Compound                       | <b>1b</b>                                                         | <b>2b</b>                                                                                           | <b>3b</b>                                                         |
|--------------------------------|-------------------------------------------------------------------|-----------------------------------------------------------------------------------------------------|-------------------------------------------------------------------|
| Lattice                        | Monoclinic                                                        | Monoclinic                                                                                          | Triclinic                                                         |
| Formula                        | C <sub>21</sub> H <sub>27</sub> RuClN <sub>4</sub> O <sub>2</sub> | 2(C <sub>22</sub> H <sub>29</sub> ClN <sub>4</sub> O <sub>2</sub> Ru),C <sub>7</sub> H <sub>8</sub> | C <sub>26</sub> H <sub>29</sub> RuClN <sub>4</sub> O <sub>2</sub> |
| Formula weight                 | 503.99                                                            | 1128.16                                                                                             | 566.05                                                            |
| Space group                    | <i>P2</i> <sub>1</sub> / <i>n</i>                                 | <i>P2</i> <sub>1</sub> / <i>n</i>                                                                   | <i>P1</i>                                                         |
| a/Å                            | 12.9792(4)                                                        | 14.6902(9)                                                                                          | 9.7727(4)                                                         |
| b/Å                            | 13.3677(5)                                                        | 13.7174(9)                                                                                          | 10.5843(4)                                                        |
| c/Å                            | 13.2454(4)                                                        | 24.6811(15)                                                                                         | 11.9045(5)                                                        |
| α/°                            | 90                                                                | 90                                                                                                  | 92.434(10)                                                        |
| β/°                            | 113.95                                                            | 93.8260(10)                                                                                         | 93.6720(10)                                                       |
| γ/°                            | 90                                                                | 90                                                                                                  | 95.5490(10)                                                       |
| V/Å <sup>3</sup>               | 2100.19(12)                                                       | 4962.4(5)                                                                                           | 1221.61(9)                                                        |
| Z                              | 4                                                                 | 4                                                                                                   | 2                                                                 |
| Temperature (K)                | 125(2)                                                            | 125(2)                                                                                              | 125(2)                                                            |
| Radiation (λ,Å)                | 0.71073                                                           | 0.71073                                                                                             | 0.71073                                                           |
| ρ (calcd.), g cm <sup>-3</sup> | 1.594                                                             | 1.510                                                                                               | 1.539                                                             |
| θ max, deg.                    | 30.53                                                             | 30.03                                                                                               | 30.52                                                             |
| No. of data                    | 6410                                                              | 14511                                                                                               | 7604                                                              |
| No. of parameters              | 266                                                               | 645                                                                                                 | 311                                                               |
| R <sub>1</sub>                 | 0.0210                                                            | 0.0311                                                                                              | 0.0418                                                            |
| wR <sub>2</sub>                | 0.0530                                                            | 0.0698                                                                                              | 0.0937                                                            |
| GOF                            | 1.033                                                             | 1.036                                                                                               | 1.071                                                             |

**Table S2.** A comparison of the metrical data of the neutral (amido-N functionalized NHC)Ru(*p*-cymene)Cl type complexes known in the literature is shown.

| S. No. | complex | $d(\text{Ru}-\text{C}_{\text{carbene}})/$<br>(Å) | $d(\text{Ru}-\text{N})/$ (Å) | $d(\text{Ru}-\text{Cl})/$ (Å) | $d(\text{Ru}-\text{C}_{\text{centroid}})/$<br>(Å) | Reference    |
|--------|---------|--------------------------------------------------|------------------------------|-------------------------------|---------------------------------------------------|--------------|
| 1.     |         | 2.0172(19)                                       | 2.1074(16)                   | 2.4404(7)                     | 1.706                                             | [3]          |
| 2.     |         | 2.033(5)                                         | 2.125(5)                     | 2.4256(14)                    | 1.712                                             | [3]          |
| 3.     |         | 2.019(3)                                         | 2.1074(16)                   | 2.4325(8)                     | 1.719                                             | [3]          |
| 4.     |         | 2.087(5)                                         | 2.153(4)                     | 2.4299(14)                    | 1.736                                             | [4]          |
| 5.     |         | 2.0193(13)                                       | 2.1226(11)                   | 2.4095(3)                     | 1.716                                             | present work |
| 6.     |         | 2.0384(19)                                       | 2.1230(16)                   | 2.4319(5)                     | 1.724                                             | present work |
| 7.     |         | 2.016(3)                                         | 2.131(2)                     | 2.4347(7)                     | 1.714                                             | present work |

**Table S3.** Time variation study for the Ru–NHC (**1b**) catalyzed one pot tandem  $\beta$ -alkylation reaction for two representative substrates namely 1-phenylethanol and benzyl alcohol<sup>a</sup>.

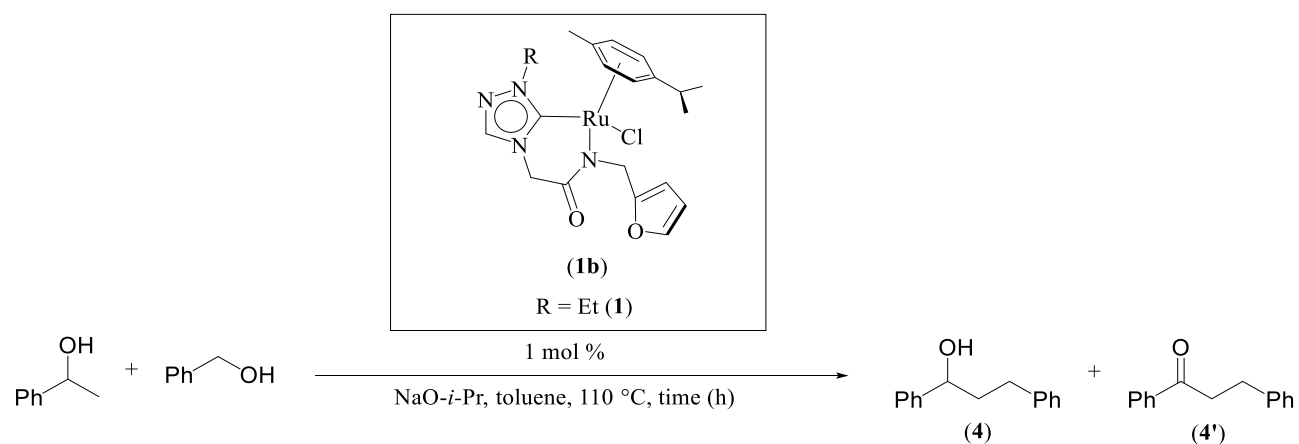

|      |          | yield <sup>b</sup> |          |
|------|----------|--------------------|----------|
| S.No | time (h) | <br>(4)            | <br>(4') |
| 1    | 0.5      | 15                 | 10       |
| 2    | 1        | 33                 | 16       |
| 3    | 2        | 39                 | 13       |
| 4    | 3        | 70                 | 17       |
| 5    | 4        | 52                 | 33       |
| 6    | 6        | 34                 | 39       |
| 7    | 12       | 14                 | 57       |
| 8    | 24       | 43                 | 14       |
| 9    | 48       | 45                 | 11       |
| 10   | 72       | 42                 | 9        |
| 11   | 96       | 14                 | 7        |
| 12   | 120      | 9                  | 6        |

(a). Reaction conditions: 1:1:1 ratio of 1°-alcohol:2°-alcohol:NaOiPr 1.00 mmol, 1 mol % of (**1b**), 2.0 mL of toluene at 110 °C for T hour. (b) Isolated yields (%).

**Table S4.** Selected results of blank, control and Hg drop experiments for the one pot tandem  $\beta$ -alkylation reaction for two representative substrates namely 1-phenylethanol and benzyl alcohol<sup>a</sup>.

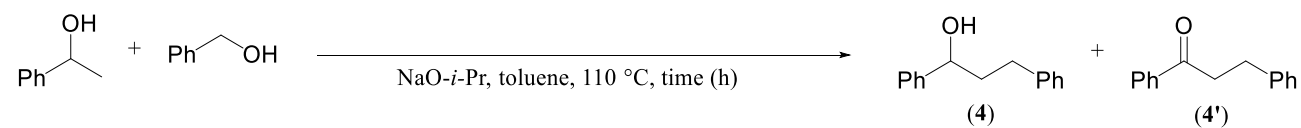

| S. No | metal complex                                        | Hg | yield <sup>b</sup> |    |
|-------|------------------------------------------------------|----|--------------------|----|
|       |                                                      |    |                    |    |
| 1     | -                                                    |    | ND                 | ND |
| 2     | [( <i>p</i> -cymene)RuCl <sub>2</sub> ] <sub>2</sub> |    | 23                 | 6  |
| 3     | <br><b>(1b)</b><br>R = Et <b>(1)</b>                 |    | 70                 | 17 |
| 4     | <br><b>(1b)</b><br>R = Et <b>(1)</b>                 | Hg | 61                 | 14 |

(a). Reaction conditions: 1:1:1 ratio of 1°-alcohol:2°-alcohol:NaOiPr 1.00 mmol, 1 mol % of **(1b)**, 2.0 mL of toluene at 110 °C for 3 hours. (b). Isolated yields (%).

**Table S5.** Selected results for the Ru–NHC (**1-3b**) catalyzed one pot synthesis of flavan derivatives (**16-20**).

| S. No. | 2° alcohol                                                                          | 1° alcohol                                                                          | product                                                                                                | Ru–NHC ( <b>1b</b> ) | Ru–NHC ( <b>2b</b> ) | Ru–NHC ( <b>3b</b> ) |
|--------|-------------------------------------------------------------------------------------|-------------------------------------------------------------------------------------|--------------------------------------------------------------------------------------------------------|----------------------|----------------------|----------------------|
|        |                                                                                     |                                                                                     |                                                                                                        | yield <sup>b</sup>   | yield <sup>b</sup>   | yield <sup>b</sup>   |
| 11     | 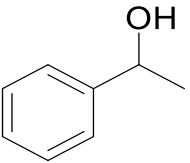   |    | <br>( <b>16</b> )   | 26                   | 28                   | 31                   |
| 12     |    |    | <br>( <b>17</b> )   | 40                   | 33                   | 37                   |
| 13     |   |   | <br>( <b>18</b> )  | 34                   | 33                   | 28                   |
| 14     |  |  | <br>( <b>19</b> ) | 30                   | 28                   | 32                   |
| 15     |  |  | <br>( <b>20</b> ) | 37                   | 29                   | 33                   |

Reaction conditions: (a). Reaction conditions: 1:1:1 ratio of 1°-alcohol:2°-alcohol:base 1.00 mmol, 1 mol % of (**1b/2b/3b**), 2.0 mL of toluene at 110 °C for 3 hours. (a). Reaction conditions: 20 mol % CuI, 20 mol % 2,2'-bipyridine, base 1.00 mmol, 1.0 mL of toluene at 110 °C for 24 hours. (c) Isolated yields (%).



## Density Functional Theory Data

Co-ordinates of Optimized Geometries and Transition States

*Dehydrogenation of alcohols*

Primary alcohols

**(1b)**

|    |              |              |              |
|----|--------------|--------------|--------------|
| Ru | 0.347238000  | 0.325521000  | 0.165767000  |
| Cl | 0.701533000  | 1.014693000  | -2.161698000 |
| O  | -0.276603000 | -3.861260000 | -0.458958000 |
| O  | -3.618149000 | -0.777095000 | -1.067733000 |
| N  | -0.231007000 | -1.558553000 | -0.592037000 |
| N  | 2.481149000  | -1.763430000 | 0.325545000  |
| N  | 3.412441000  | 0.072775000  | -0.215803000 |
| N  | 4.430954000  | -0.849313000 | -0.160996000 |
| C  | 2.201264000  | -0.449645000 | 0.074249000  |
| C  | 3.827952000  | -1.956382000 | 0.166573000  |
| H  | 4.318733000  | -2.909530000 | 0.299368000  |
| C  | 3.742623000  | 1.446703000  | -0.608060000 |
| H  | 4.412747000  | 1.853589000  | 0.158239000  |
| H  | 2.801452000  | 1.995428000  | -0.599138000 |
| C  | 4.387247000  | 1.509978000  | -1.990253000 |
| H  | 4.639174000  | 2.550433000  | -2.222761000 |
| H  | 3.685773000  | 1.145094000  | -2.745041000 |
| H  | 5.303568000  | 0.914064000  | -2.023975000 |
| C  | 1.481774000  | -2.766918000 | 0.688123000  |
| H  | 1.204205000  | -2.628872000 | 1.739931000  |
| H  | 1.935810000  | -3.752697000 | 0.582050000  |
| C  | 0.222717000  | -2.753548000 | -0.197643000 |
| C  | -1.361419000 | -1.617099000 | -1.534869000 |
| H  | -1.187409000 | -2.459024000 | -2.215172000 |
| H  | -1.361218000 | -0.697489000 | -2.122151000 |
| C  | -2.703680000 | -1.791356000 | -0.887807000 |
| C  | -3.263889000 | -2.771684000 | -0.118375000 |
| H  | -2.767731000 | -3.688839000 | 0.162754000  |
| C  | -4.594193000 | -2.341723000 | 0.200502000  |
| H  | -5.332532000 | -2.872165000 | 0.786739000  |
| C  | -4.758464000 | -1.131225000 | -0.401608000 |
| H  | -5.580520000 | -0.435262000 | -0.475213000 |
| C  | 0.463322000  | 0.715050000  | 2.416213000  |
| C  | -0.773521000 | 0.089558000  | 2.128533000  |
| H  | -1.013857000 | -0.864872000 | 2.585288000  |
| C  | -1.738479000 | 0.711888000  | 1.271829000  |

|   |              |              |              |
|---|--------------|--------------|--------------|
| H | -2.679798000 | 0.205033000  | 1.091486000  |
| C | -1.460227000 | 1.913344000  | 0.609950000  |
| C | -0.154323000 | 2.488377000  | 0.819637000  |
| H | 0.132175000  | 3.370302000  | 0.259518000  |
| C | 0.754526000  | 1.950506000  | 1.745058000  |
| H | 1.710380000  | 2.438212000  | 1.908714000  |
| C | 1.425690000  | 0.142185000  | 3.424542000  |
| H | 1.293089000  | 0.637148000  | 4.395354000  |
| H | 2.465621000  | 0.290322000  | 3.116858000  |
| H | 1.257853000  | -0.928536000 | 3.573789000  |
| C | -2.519022000 | 2.566504000  | -0.269137000 |
| H | -3.036172000 | 1.750277000  | -0.787210000 |
| C | -1.957976000 | 3.520020000  | -1.333635000 |
| H | -1.193885000 | 3.030311000  | -1.944273000 |
| H | -1.525655000 | 4.423471000  | -0.883830000 |
| H | -2.770115000 | 3.848006000  | -1.991749000 |
| C | -3.550726000 | 3.288578000  | 0.625806000  |
| H | -4.013091000 | 2.604133000  | 1.345779000  |
| H | -4.346760000 | 3.722207000  | 0.009608000  |
| H | -3.080285000 | 4.104361000  | 1.188964000  |

(E')

|    |              |              |              |
|----|--------------|--------------|--------------|
| Ru | 0.439394000  | -0.734381000 | -0.387611000 |
| O  | 0.985237000  | -0.514073000 | 3.824754000  |
| O  | 2.608150000  | 2.649874000  | 1.005597000  |
| N  | 0.458976000  | -0.088944000 | 1.623843000  |
| N  | -0.637649000 | -2.761269000 | 1.558380000  |
| N  | -1.829944000 | -2.838534000 | -0.203425000 |
| N  | -2.372953000 | -3.772158000 | 0.643557000  |
| C  | -0.762396000 | -2.203171000 | 0.320615000  |
| C  | -1.626203000 | -3.701450000 | 1.708130000  |
| H  | -1.760414000 | -4.300648000 | 2.597175000  |
| C  | -2.488777000 | -2.621517000 | -1.497455000 |
| H  | -2.440212000 | -3.565620000 | -2.049552000 |
| H  | -1.888945000 | -1.876421000 | -2.021267000 |
| C  | -3.935231000 | -2.161258000 | -1.332743000 |
| H  | -4.389079000 | -2.032863000 | -2.320936000 |
| H  | -3.979257000 | -1.207367000 | -0.798939000 |
| H  | -4.518300000 | -2.902844000 | -0.780975000 |
| C  | 0.381141000  | -2.395925000 | 2.541861000  |
| H  | 1.326534000  | -2.884780000 | 2.279440000  |
| H  | 0.068094000  | -2.776220000 | 3.514730000  |
| C  | 0.624971000  | -0.887609000 | 2.706657000  |
| C  | 0.763942000  | 1.334824000  | 1.902227000  |
| H  | 0.309146000  | 1.583011000  | 2.868144000  |
| H  | 0.285585000  | 1.949162000  | 1.134436000  |

|   |              |              |              |
|---|--------------|--------------|--------------|
| C | 2.213894000  | 1.709506000  | 1.931942000  |
| C | 3.285155000  | 1.347620000  | 2.697749000  |
| H | 3.255815000  | 0.649183000  | 3.520876000  |
| C | 4.408900000  | 2.096699000  | 2.216282000  |
| H | 5.420849000  | 2.073666000  | 2.596436000  |
| C | 3.945195000  | 2.872719000  | 1.198069000  |
| H | 4.394174000  | 3.619138000  | 0.560543000  |
| C | 1.872580000  | -2.275273000 | -1.257650000 |
| C | 2.601318000  | -1.311976000 | -0.514185000 |
| H | 3.188966000  | -1.626940000 | 0.341409000  |
| C | 2.654961000  | 0.057754000  | -0.926128000 |
| H | 3.283296000  | 0.744532000  | -0.371427000 |
| C | 1.882584000  | 0.526893000  | -1.995048000 |
| C | 1.018701000  | -0.428852000 | -2.642294000 |
| H | 0.354986000  | -0.093884000 | -3.431630000 |
| C | 1.070738000  | -1.800578000 | -2.346046000 |
| H | 0.465906000  | -2.500272000 | -2.913370000 |
| C | 1.966887000  | -3.745804000 | -0.948719000 |
| H | 2.724591000  | -4.205092000 | -1.595981000 |
| H | 1.020301000  | -4.262938000 | -1.130206000 |
| H | 2.270670000  | -3.921318000 | 0.086912000  |
| C | 2.029776000  | 1.970751000  | -2.466986000 |
| H | 1.978514000  | 2.603843000  | -1.572829000 |
| C | 0.955182000  | 2.433676000  | -3.460463000 |
| H | -0.060631000 | 2.309588000  | -3.072560000 |
| H | 1.026975000  | 1.897707000  | -4.414535000 |
| H | 1.094401000  | 3.496746000  | -3.679164000 |
| C | 3.434206000  | 2.156820000  | -3.089004000 |
| H | 4.230053000  | 1.912151000  | -2.378523000 |
| H | 3.568773000  | 3.197933000  | -3.400441000 |
| H | 3.559913000  | 1.521526000  | -3.973586000 |
| C | -1.789264000 | 1.685794000  | -0.888171000 |
| O | -1.465377000 | 0.398710000  | -0.261273000 |
| C | -3.022446000 | 2.284485000  | -0.275012000 |
| C | -4.297515000 | 1.912174000  | -0.726447000 |
| C | -2.910439000 | 3.201100000  | 0.780553000  |
| C | -5.439890000 | 2.441775000  | -0.128488000 |
| H | -4.392721000 | 1.215759000  | -1.556205000 |
| C | -4.053726000 | 3.730147000  | 1.380952000  |
| H | -1.926867000 | 3.514233000  | 1.124808000  |
| C | -5.318372000 | 3.349312000  | 0.927733000  |
| H | -6.423179000 | 2.154780000  | -0.489318000 |
| H | -3.957288000 | 4.443871000  | 2.193660000  |
| H | -6.208505000 | 3.765304000  | 1.390447000  |
| H | -0.926477000 | 2.352324000  | -0.788008000 |
| H | -1.506349000 | 0.501842000  | 0.711267000  |

|                       |              |              |              |
|-----------------------|--------------|--------------|--------------|
| H                     | -1.930961000 | 1.442127000  | -1.942628000 |
| (TS <sup>E'E'</sup> ) |              |              |              |
| Ru                    | -0.637222000 | -0.728745000 | -0.023848000 |
| O                     | -0.589400000 | 1.991492000  | -3.282444000 |
| O                     | -2.106231000 | 3.069906000  | 0.754421000  |
| N                     | -0.073324000 | 1.042613000  | -1.243181000 |
| N                     | 0.485832000  | -1.418688000 | -2.758119000 |
| N                     | 1.190290000  | -2.867021000 | -1.373196000 |
| N                     | 1.796733000  | -3.178959000 | -2.564526000 |
| C                     | 0.375108000  | -1.797739000 | -1.451451000 |
| C                     | 1.349982000  | -2.280961000 | -3.390872000 |
| H                     | 1.611385000  | -2.217191000 | -4.437378000 |
| C                     | 1.584762000  | -3.652198000 | -0.196654000 |
| H                     | 1.371144000  | -4.700663000 | -0.425337000 |
| H                     | 0.938910000  | -3.329437000 | 0.618020000  |
| C                     | 3.057792000  | -3.453424000 | 0.154208000  |
| H                     | 3.308946000  | -4.064835000 | 1.027005000  |
| H                     | 3.256342000  | -2.404109000 | 0.390197000  |
| H                     | 3.699881000  | -3.759863000 | -0.675697000 |
| C                     | -0.233823000 | -0.319313000 | -3.383353000 |
| H                     | -1.271944000 | -0.619800000 | -3.567759000 |
| H                     | 0.223929000  | -0.115764000 | -4.352954000 |
| C                     | -0.283789000 | 1.011525000  | -2.627802000 |
| C                     | -0.258798000 | 2.426861000  | -0.682843000 |
| H                     | 0.308224000  | 3.107118000  | -1.324902000 |
| H                     | 0.210450000  | 2.429034000  | 0.301232000  |
| C                     | -1.660184000 | 2.920180000  | -0.540643000 |
| C                     | -2.638716000 | 3.323439000  | -1.405505000 |
| H                     | -2.558066000 | 3.340939000  | -2.481888000 |
| C                     | -3.755160000 | 3.733941000  | -0.606311000 |
| H                     | -4.701189000 | 4.123186000  | -0.956047000 |
| C                     | -3.377769000 | 3.566005000  | 0.691398000  |
| H                     | -3.853061000 | 3.764013000  | 1.640192000  |
| C                     | -2.894839000 | -1.207753000 | -0.250423000 |
| C                     | -2.759345000 | -0.010897000 | 0.510352000  |
| H                     | -3.218092000 | 0.898134000  | 0.137535000  |
| C                     | -2.036321000 | 0.032996000  | 1.725696000  |
| H                     | -1.958139000 | 0.974512000  | 2.256259000  |
| C                     | -1.389120000 | -1.128031000 | 2.229733000  |
| C                     | -1.458757000 | -2.314327000 | 1.451853000  |
| H                     | -0.970365000 | -3.217467000 | 1.793991000  |
| C                     | -2.189592000 | -2.342086000 | 0.229716000  |
| H                     | -2.208767000 | -3.260592000 | -0.349436000 |
| C                     | -3.759206000 | -1.264639000 | -1.482705000 |
| H                     | -4.787821000 | -1.529860000 | -1.207377000 |

|   |              |              |              |
|---|--------------|--------------|--------------|
| H | -3.403885000 | -2.020877000 | -2.189520000 |
| H | -3.795481000 | -0.295915000 | -1.989652000 |
| C | -0.694575000 | -1.071802000 | 3.579718000  |
| H | -0.213899000 | -0.087246000 | 3.648607000  |
| C | 0.380203000  | -2.146065000 | 3.793651000  |
| H | 1.125825000  | -2.142998000 | 2.991490000  |
| H | -0.054386000 | -3.150148000 | 3.863235000  |
| H | 0.902874000  | -1.958513000 | 4.736535000  |
| C | -1.770146000 | -1.141650000 | 4.690560000  |
| H | -2.510072000 | -0.340679000 | 4.592537000  |
| H | -1.294197000 | -1.044751000 | 5.671648000  |
| H | -2.300122000 | -2.100586000 | 4.664715000  |
| C | 1.910272000  | 0.504033000  | 1.421434000  |
| O | 1.400931000  | -0.136360000 | 0.247472000  |
| C | 3.008653000  | 1.484545000  | 1.070497000  |
| C | 4.091370000  | 1.083659000  | 0.273332000  |
| C | 2.967964000  | 2.801057000  | 1.545305000  |
| C | 5.109151000  | 1.982657000  | -0.041317000 |
| H | 4.133034000  | 0.064356000  | -0.101412000 |
| C | 3.991307000  | 3.701193000  | 1.237684000  |
| H | 2.136829000  | 3.124803000  | 2.168940000  |
| C | 5.062179000  | 3.293986000  | 0.441715000  |
| H | 5.943673000  | 1.660453000  | -0.657969000 |
| H | 3.948759000  | 4.718225000  | 1.617007000  |
| H | 5.857843000  | 3.992480000  | 0.199190000  |
| H | 1.111062000  | 1.025066000  | 1.968828000  |
| H | 0.940753000  | 0.629055000  | -0.709366000 |
| H | 2.296647000  | -0.282389000 | 2.084563000  |

(E'')

|    |              |              |              |
|----|--------------|--------------|--------------|
| Ru | 0.947703000  | 0.059965000  | 0.031023000  |
| O  | 0.396096000  | -1.886951000 | -3.308881000 |
| O  | -1.329160000 | -3.168348000 | 0.525681000  |
| N  | -0.508834000 | -0.623496000 | -1.610570000 |
| N  | 1.039674000  | 1.610930000  | -2.588231000 |
| N  | 1.216336000  | 3.004677000  | -0.993607000 |
| N  | 1.177539000  | 3.763094000  | -2.138105000 |
| C  | 1.142492000  | 1.682039000  | -1.221628000 |
| C  | 1.071469000  | 2.891261000  | -3.094434000 |
| H  | 1.021459000  | 3.129425000  | -4.147380000 |
| C  | 1.252535000  | 3.722160000  | 0.288380000  |
| H  | 2.126378000  | 4.379881000  | 0.255359000  |
| H  | 1.403700000  | 2.964847000  | 1.054241000  |
| C  | -0.028647000 | 4.512361000  | 0.540314000  |
| H  | 0.061214000  | 5.051780000  | 1.488898000  |
| H  | -0.881938000 | 3.832373000  | 0.600151000  |

|   |              |              |              |
|---|--------------|--------------|--------------|
| H | -0.199285000 | 5.244556000  | -0.253735000 |
| C | 1.022048000  | 0.386014000  | -3.372788000 |
| H | 2.042108000  | 0.048258000  | -3.579680000 |
| H | 0.550600000  | 0.601686000  | -4.337324000 |
| C | 0.277875000  | -0.807397000 | -2.769895000 |
| C | -1.560381000 | -1.687864000 | -1.388617000 |
| H | -2.037950000 | -1.863600000 | -2.357024000 |
| H | -2.293114000 | -1.232349000 | -0.720908000 |
| C | -1.116143000 | -2.989251000 | -0.821650000 |
| C | -0.619552000 | -4.142487000 | -1.361482000 |
| H | -0.366496000 | -4.294117000 | -2.400399000 |
| C | -0.507524000 | -5.085640000 | -0.290405000 |
| H | -0.160227000 | -6.107534000 | -0.351081000 |
| C | -0.953655000 | -4.444533000 | 0.826702000  |
| H | -1.087793000 | -4.744396000 | 1.855192000  |
| C | 2.804365000  | -1.376702000 | -0.126635000 |
| C | 1.752459000  | -2.043024000 | 0.576415000  |
| H | 1.376102000  | -2.981939000 | 0.183778000  |
| C | 1.191438000  | -1.522224000 | 1.760485000  |
| H | 0.398848000  | -2.069030000 | 2.256328000  |
| C | 1.623462000  | -0.268762000 | 2.286164000  |
| C | 2.605067000  | 0.444235000  | 1.554526000  |
| H | 2.947226000  | 1.410949000  | 1.902316000  |
| C | 3.184849000  | -0.109570000 | 0.367798000  |
| H | 3.933115000  | 0.467712000  | -0.166734000 |
| C | 3.456822000  | -2.007809000 | -1.328978000 |
| H | 4.169561000  | -2.778719000 | -1.010419000 |
| H | 4.013162000  | -1.269674000 | -1.915067000 |
| H | 2.718561000  | -2.488592000 | -1.978792000 |
| C | 1.067752000  | 0.213678000  | 3.614380000  |
| H | 0.045147000  | -0.176540000 | 3.689993000  |
| C | 1.004073000  | 1.738472000  | 3.771813000  |
| H | 0.420519000  | 2.198141000  | 2.968401000  |
| H | 2.001840000  | 2.192954000  | 3.790896000  |
| H | 0.522721000  | 1.987711000  | 4.722643000  |
| C | 1.898501000  | -0.428694000 | 4.750858000  |
| H | 1.910097000  | -1.521461000 | 4.680046000  |
| H | 1.469547000  | -0.156859000 | 5.720756000  |
| H | 2.935621000  | -0.074905000 | 4.728301000  |
| C | -1.725888000 | 0.646339000  | 1.340577000  |
| O | -0.792046000 | 1.107572000  | 0.390003000  |
| C | -3.153984000 | 0.756619000  | 0.821461000  |
| C | -3.514784000 | 1.744442000  | -0.104902000 |
| C | -4.142719000 | -0.118596000 | 1.292861000  |
| C | -4.834862000 | 1.856162000  | -0.546581000 |
| H | -2.755122000 | 2.426337000  | -0.474829000 |

|   |              |              |              |
|---|--------------|--------------|--------------|
| C | -5.463961000 | -0.005275000 | 0.855716000  |
| H | -3.877530000 | -0.894454000 | 2.008640000  |
| C | -5.813677000 | 0.983099000  | -0.066830000 |
| H | -5.101314000 | 2.630010000  | -1.261816000 |
| H | -6.217754000 | -0.691997000 | 1.230974000  |
| H | -6.840722000 | 1.071716000  | -0.409307000 |
| H | -1.545631000 | -0.403611000 | 1.623271000  |
| H | -0.950038000 | 0.298084000  | -1.494484000 |
| H | -1.640263000 | 1.235959000  | 2.271196000  |

(TS<sup>E</sup>F')

|    |              |              |              |
|----|--------------|--------------|--------------|
| Ru | 0.347102000  | -0.618432000 | 0.473464000  |
| O  | -1.068324000 | -3.329358000 | -1.661252000 |
| O  | -3.581465000 | -0.078733000 | -0.253650000 |
| N  | -0.517207000 | -1.084058000 | -1.524372000 |
| N  | 2.253547000  | -1.924387000 | -1.487654000 |
| N  | 3.372454000  | -0.509848000 | -0.363623000 |
| N  | 4.266149000  | -1.060948000 | -1.249172000 |
| C  | 2.122871000  | -1.013398000 | -0.467583000 |
| C  | 3.556755000  | -1.912542000 | -1.924433000 |
| H  | 3.935051000  | -2.535477000 | -2.722312000 |
| C  | 3.880727000  | 0.495125000  | 0.580405000  |
| H  | 4.445969000  | -0.033215000 | 1.356889000  |
| H  | 3.000691000  | 0.942951000  | 1.041009000  |
| C  | 4.758178000  | 1.545794000  | -0.095293000 |
| H  | 5.100471000  | 2.261445000  | 0.659035000  |
| H  | 4.205319000  | 2.093036000  | -0.865598000 |
| H  | 5.633815000  | 1.087690000  | -0.559905000 |
| C  | 1.231504000  | -2.855124000 | -1.945992000 |
| H  | 1.381460000  | -3.839116000 | -1.492744000 |
| H  | 1.333443000  | -2.971691000 | -3.031733000 |
| C  | -0.220109000 | -2.462206000 | -1.675365000 |
| C  | -1.925682000 | -0.689646000 | -1.916030000 |
| H  | -2.085837000 | -1.092164000 | -2.921735000 |
| H  | -1.897679000 | 0.398046000  | -1.982354000 |
| C  | -3.065587000 | -1.081003000 | -1.043419000 |
| C  | -3.840487000 | -2.200214000 | -0.918714000 |
| H  | -3.679013000 | -3.138984000 | -1.426887000 |
| C  | -4.882505000 | -1.881801000 | 0.008993000  |
| H  | -5.683024000 | -2.527724000 | 0.341400000  |
| C  | -4.678794000 | -0.585174000 | 0.376792000  |
| H  | -5.207041000 | 0.098765000  | 1.023916000  |
| C  | -0.323824000 | -2.328564000 | 1.984376000  |
| C  | -1.419364000 | -1.438968000 | 1.757742000  |
| H  | -2.347465000 | -1.844427000 | 1.369722000  |
| C  | -1.330858000 | -0.056225000 | 2.011570000  |

|   |              |              |              |
|---|--------------|--------------|--------------|
| H | -2.188184000 | 0.575265000  | 1.814064000  |
| C | -0.118049000 | 0.525546000  | 2.488862000  |
| C | 0.996627000  | -0.335245000 | 2.656967000  |
| H | 1.942665000  | 0.062531000  | 3.001511000  |
| C | 0.891420000  | -1.735987000 | 2.397974000  |
| H | 1.770716000  | -2.359762000 | 2.528301000  |
| C | -0.474321000 | -3.813734000 | 1.789352000  |
| H | -1.019660000 | -4.252286000 | 2.634586000  |
| H | 0.500073000  | -4.308211000 | 1.732087000  |
| H | -1.036240000 | -4.041596000 | 0.877949000  |
| C | -0.108455000 | 1.999779000  | 2.862239000  |
| H | -0.669114000 | 2.526671000  | 2.079559000  |
| C | 1.283283000  | 2.635421000  | 2.960676000  |
| H | 1.847030000  | 2.533625000  | 2.027528000  |
| H | 1.876641000  | 2.203126000  | 3.774905000  |
| H | 1.183676000  | 3.704716000  | 3.172116000  |
| C | -0.876476000 | 2.175371000  | 4.194006000  |
| H | -1.897315000 | 1.785042000  | 4.131353000  |
| H | -0.937058000 | 3.238187000  | 4.450211000  |
| H | -0.364949000 | 1.658636000  | 5.014275000  |
| C | 0.922465000  | 1.759731000  | -1.740285000 |
| O | 0.871001000  | 0.927953000  | -2.679324000 |
| C | -0.063656000 | 2.873384000  | -1.604655000 |
| C | -1.115989000 | 2.996334000  | -2.523654000 |
| C | 0.099067000  | 3.843906000  | -0.605267000 |
| C | -2.007044000 | 4.063141000  | -2.427708000 |
| H | -1.196724000 | 2.270496000  | -3.326829000 |
| C | -0.792771000 | 4.910459000  | -0.508578000 |
| H | 0.934186000  | 3.766987000  | 0.087750000  |
| C | -1.851065000 | 5.017014000  | -1.416768000 |
| H | -2.814124000 | 4.162378000  | -3.147790000 |
| H | -0.659127000 | 5.664926000  | 0.261445000  |
| H | -2.543112000 | 5.851288000  | -1.346629000 |
| H | 0.573126000  | 0.961013000  | -0.449386000 |
| H | 0.111528000  | -0.471263000 | -2.092584000 |
| H | 1.895857000  | 1.968855000  | -1.255240000 |

(F')

|    |              |              |              |
|----|--------------|--------------|--------------|
| Ru | -1.259585000 | -0.593095000 | -0.113642000 |
| O  | -0.526325000 | 1.663033000  | -2.889495000 |
| O  | -1.947516000 | 3.249957000  | 1.059174000  |
| N  | 0.094506000  | 1.077132000  | -0.730942000 |
| N  | 1.104138000  | -1.370809000 | -1.780483000 |
| N  | 0.959783000  | -2.779254000 | -0.193095000 |
| N  | 2.076659000  | -3.147003000 | -0.907033000 |
| C  | 0.329745000  | -1.694592000 | -0.689486000 |



|   |              |              |              |
|---|--------------|--------------|--------------|
| C | 2.140358000  | -2.270275000 | -1.863907000 |
| H | 2.900243000  | -2.250965000 | -2.631779000 |
| C | 0.640558000  | -3.531969000 | 1.023841000  |
| H | 0.551686000  | -4.584764000 | 0.739538000  |
| H | -0.332678000 | -3.169637000 | 1.355174000  |
| C | 1.698761000  | -3.344945000 | 2.109089000  |
| H | 1.436616000  | -3.948848000 | 2.983709000  |
| H | 1.755063000  | -2.296119000 | 2.418729000  |
| H | 2.681950000  | -3.664135000 | 1.752478000  |
| C | 0.822014000  | -0.289453000 | -2.714962000 |
| H | 0.259825000  | -0.658424000 | -3.577119000 |
| H | 1.777143000  | 0.105534000  | -3.079151000 |
| C | 0.039874000  | 0.896904000  | -2.139605000 |
| C | -0.062458000 | 2.501045000  | -0.261684000 |
| H | 0.571550000  | 3.117497000  | -0.907607000 |
| H | 0.356004000  | 2.514142000  | 0.746435000  |
| C | -1.429654000 | 3.085382000  | -0.202784000 |
| C | -2.277929000 | 3.637433000  | -1.121216000 |
| H | -2.117859000 | 3.665267000  | -2.188865000 |
| C | -3.389315000 | 4.164487000  | -0.389124000 |
| H | -4.250899000 | 4.681138000  | -0.788509000 |
| C | -3.134091000 | 3.906467000  | 0.925603000  |
| H | -3.652978000 | 4.131473000  | 1.845143000  |
| C | -3.048934000 | -1.379805000 | -1.574426000 |
| C | -3.302160000 | -0.034789000 | -1.263789000 |
| H | -3.420444000 | 0.688249000  | -2.065152000 |
| C | -3.425472000 | 0.419398000  | 0.087360000  |
| H | -3.663378000 | 1.461580000  | 0.264947000  |
| C | -3.267645000 | -0.451248000 | 1.179403000  |
| C | -2.879899000 | -1.799583000 | 0.879500000  |
| H | -2.710198000 | -2.506929000 | 1.682370000  |
| C | -2.766284000 | -2.239867000 | -0.463518000 |
| H | -2.489292000 | -3.272721000 | -0.653975000 |
| C | -3.048307000 | -1.896629000 | -2.989595000 |
| H | -4.025093000 | -2.332407000 | -3.236047000 |
| H | -2.297903000 | -2.680976000 | -3.133214000 |
| H | -2.856680000 | -1.093171000 | -3.707154000 |
| C | -3.540816000 | 0.026944000  | 2.595794000  |
| H | -3.406226000 | 1.115207000  | 2.587299000  |
| C | -2.594486000 | -0.553216000 | 3.657287000  |
| H | -1.547088000 | -0.364812000 | 3.401782000  |
| H | -2.731678000 | -1.633795000 | 3.783895000  |
| H | -2.802028000 | -0.089454000 | 4.627165000  |
| C | -5.015943000 | -0.268200000 | 2.950366000  |
| H | -5.703726000 | 0.190284000  | 2.231883000  |
| H | -5.249353000 | 0.126934000  | 3.944701000  |

|   |              |              |              |
|---|--------------|--------------|--------------|
| H | -5.210622000 | -1.347256000 | 2.964458000  |
| C | 3.637714000  | 0.672674000  | 0.794575000  |
| O | 2.891520000  | 0.672342000  | -0.184374000 |
| C | 5.089609000  | 0.833699000  | 0.740994000  |
| C | 5.750697000  | 1.027925000  | -0.486127000 |
| C | 5.825483000  | 0.799097000  | 1.937642000  |
| C | 7.130727000  | 1.183446000  | -0.509922000 |
| H | 5.165389000  | 1.058300000  | -1.399688000 |
| C | 7.209199000  | 0.954232000  | 1.909937000  |
| H | 5.309254000  | 0.651472000  | 2.883562000  |
| C | 7.858853000  | 1.145828000  | 0.687256000  |
| H | 7.646618000  | 1.336204000  | -1.453112000 |
| H | 7.780313000  | 0.928052000  | 2.832767000  |
| H | 8.937937000  | 1.268613000  | 0.664382000  |
| H | -0.385720000 | -0.494255000 | 1.221462000  |
| H | 1.005355000  | 0.753450000  | -0.372784000 |
| H | 3.212394000  | 0.545967000  | 1.809914000  |

*Dehydrogenation of Seconadary alcohols*

(A')

|    |              |              |              |
|----|--------------|--------------|--------------|
| Ru | -0.400443000 | -0.889608000 | 0.266402000  |
| O  | -0.508850000 | -0.036468000 | -3.895925000 |
| O  | -2.636314000 | 2.564094000  | -0.846391000 |
| N  | -0.237775000 | 0.071921000  | -1.611120000 |
| N  | 1.037885000  | -2.515164000 | -1.818132000 |
| N  | 2.015962000  | -2.819111000 | 0.048297000  |
| N  | 2.713230000  | -3.581491000 | -0.855391000 |
| C  | 0.978778000  | -2.157447000 | -0.504016000 |
| C  | 2.095275000  | -3.374499000 | -1.982828000 |
| H  | 2.372953000  | -3.816585000 | -2.928842000 |
| C  | 2.484136000  | -2.797072000 | 1.440244000  |
| H  | 2.333726000  | -3.799645000 | 1.854944000  |
| H  | 1.832993000  | -2.097821000 | 1.965511000  |
| C  | 3.949776000  | -2.384605000 | 1.546695000  |
| H  | 4.251914000  | -2.390010000 | 2.598792000  |
| H  | 4.098707000  | -1.377080000 | 1.146445000  |
| H  | 4.591976000  | -3.078366000 | 0.999086000  |
| C  | 0.116069000  | -2.052538000 | -2.854915000 |
| H  | -0.810215000 | -2.636195000 | -2.798969000 |
| H  | 0.571613000  | -2.245413000 | -3.826778000 |
| C  | -0.231976000 | -0.556079000 | -2.813325000 |
| C  | -0.618391000 | 1.502972000  | -1.706572000 |
| H  | -0.086685000 | 1.922911000  | -2.567892000 |
| H  | -0.262855000 | 2.019225000  | -0.811273000 |
| C  | -2.081294000 | 1.793491000  | -1.844237000 |

|   |              |              |              |
|---|--------------|--------------|--------------|
| C | -3.039414000 | 1.486669000  | -2.768036000 |
| H | -2.874511000 | 0.919465000  | -3.672013000 |
| C | -4.258383000 | 2.091141000  | -2.316072000 |
| H | -5.221487000 | 2.066205000  | -2.806924000 |
| C | -3.959222000 | 2.735516000  | -1.154431000 |
| H | -4.524475000 | 3.353773000  | -0.473703000 |
| C | -1.787596000 | -2.637207000 | 0.711635000  |
| C | -2.502292000 | -1.625180000 | 0.020836000  |
| H | -2.950110000 | -1.847801000 | -0.941780000 |
| C | -2.723210000 | -0.339843000 | 0.609808000  |
| H | -3.333979000 | 0.378870000  | 0.076234000  |
| C | -2.134115000 | 0.012932000  | 1.829892000  |
| C | -1.279160000 | -0.970099000 | 2.446624000  |
| H | -0.752099000 | -0.715468000 | 3.359130000  |
| C | -1.172061000 | -2.281202000 | 1.954571000  |
| H | -0.584587000 | -3.016213000 | 2.494694000  |
| C | -1.714382000 | -4.046462000 | 0.186442000  |
| H | -2.509583000 | -4.646744000 | 0.646155000  |
| H | -0.759843000 | -4.523287000 | 0.427089000  |
| H | -1.861931000 | -4.081383000 | -0.896473000 |
| C | -2.464686000 | 1.356183000  | 2.474164000  |
| H | -2.366635000 | 2.115532000  | 1.689154000  |
| C | -1.556899000 | 1.745407000  | 3.648474000  |
| H | -0.497134000 | 1.761586000  | 3.375017000  |
| H | -1.680689000 | 1.067217000  | 4.501450000  |
| H | -1.821345000 | 2.748593000  | 3.996545000  |
| C | -3.942834000 | 1.346600000  | 2.930405000  |
| H | -4.624138000 | 1.148240000  | 2.096963000  |
| H | -4.207357000 | 2.319690000  | 3.357330000  |
| H | -4.113846000 | 0.583958000  | 3.699200000  |
| C | 1.668793000  | 1.584549000  | 1.307367000  |
| O | 1.434687000  | 0.358154000  | 0.516977000  |
| C | 2.566864000  | 2.515484000  | 0.522897000  |
| C | 3.839397000  | 2.102411000  | 0.096663000  |
| C | 2.131541000  | 3.809971000  | 0.210668000  |
| C | 4.656439000  | 2.969291000  | -0.627709000 |
| H | 4.194749000  | 1.102287000  | 0.332069000  |
| C | 2.953863000  | 4.681288000  | -0.506028000 |
| H | 1.147988000  | 4.142083000  | 0.535487000  |
| C | 4.216111000  | 4.261298000  | -0.927916000 |
| H | 5.638786000  | 2.639573000  | -0.953198000 |
| H | 2.606258000  | 5.683798000  | -0.737235000 |
| H | 4.855464000  | 4.936872000  | -1.488437000 |
| H | 0.696646000  | 2.068370000  | 1.452530000  |
| C | 2.239790000  | 1.149210000  | 2.650711000  |
| H | 3.221375000  | 0.683144000  | 2.526238000  |

|   |             |             |              |
|---|-------------|-------------|--------------|
| H | 2.356429000 | 2.020926000 | 3.302091000  |
| H | 1.573843000 | 0.435660000 | 3.147818000  |
| H | 1.510819000 | 0.584389000 | -0.433070000 |

(TS<sup>A'A</sup>)

|    |              |              |              |
|----|--------------|--------------|--------------|
| Ru | -0.793620000 | -0.564605000 | -0.063325000 |
| O  | 1.672423000  | -0.477372000 | 3.460752000  |
| O  | 3.039516000  | -2.216532000 | -0.364160000 |
| N  | 0.859338000  | -0.083196000 | 1.335783000  |
| N  | -1.757967000 | 0.320811000  | 2.672733000  |
| N  | -3.160016000 | 0.989505000  | 1.222764000  |
| N  | -3.620306000 | 1.471658000  | 2.422117000  |
| C  | -2.025302000 | 0.270447000  | 1.334320000  |
| C  | -2.746650000 | 1.051955000  | 3.287365000  |
| H  | -2.785959000 | 1.243767000  | 4.350045000  |
| C  | -3.915714000 | 1.348624000  | 0.013983000  |
| H  | -4.870162000 | 0.812090000  | 0.050351000  |
| H  | -3.333514000 | 0.975425000  | -0.827530000 |
| C  | -4.144374000 | 2.854234000  | -0.095201000 |
| H  | -4.707004000 | 3.065191000  | -1.010302000 |
| H  | -3.192037000 | 3.389585000  | -0.140988000 |
| H  | -4.718913000 | 3.225533000  | 0.756353000  |
| C  | -0.661697000 | -0.353182000 | 3.353143000  |
| H  | -0.899579000 | -1.418955000 | 3.456328000  |
| H  | -0.575691000 | 0.061092000  | 4.358836000  |
| C  | 0.729132000  | -0.274638000 | 2.719550000  |
| C  | 2.283488000  | -0.269159000 | 0.881021000  |
| H  | 2.908097000  | 0.361042000  | 1.520244000  |
| H  | 2.338195000  | 0.130620000  | -0.131567000 |
| C  | 2.807452000  | -1.667972000 | 0.879511000  |
| C  | 3.183375000  | -2.562983000 | 1.841837000  |
| H  | 3.141336000  | -2.395986000 | 2.907356000  |
| C  | 3.660227000  | -3.730875000 | 1.162201000  |
| H  | 4.047764000  | -4.635057000 | 1.610455000  |
| C  | 3.556656000  | -3.466060000 | -0.168707000 |
| H  | 3.814112000  | -4.013576000 | -1.062736000 |
| C  | -1.480089000 | -2.769957000 | -0.036467000 |
| C  | -0.135213000 | -2.698422000 | -0.481243000 |
| H  | 0.635417000  | -3.210885000 | 0.084851000  |
| C  | 0.233898000  | -2.009755000 | -1.674292000 |
| H  | 1.273060000  | -2.021393000 | -1.979029000 |
| C  | -0.721619000 | -1.299605000 | -2.426029000 |
| C  | -2.049827000 | -1.229234000 | -1.903597000 |
| H  | -2.805380000 | -0.652749000 | -2.422174000 |
| C  | -2.417767000 | -1.969285000 | -0.750954000 |
| H  | -3.443898000 | -1.918724000 | -0.398676000 |

|   |              |              |              |
|---|--------------|--------------|--------------|
| C | -1.891437000 | -3.633261000 | 1.127069000  |
| H | -2.194721000 | -4.625518000 | 0.770098000  |
| H | -2.741119000 | -3.204523000 | 1.667210000  |
| H | -1.063830000 | -3.776193000 | 1.828194000  |
| C | -0.326059000 | -0.678128000 | -3.756474000 |
| H | 0.655618000  | -0.207310000 | -3.611380000 |
| C | -1.299449000 | 0.382269000  | -4.286922000 |
| H | -1.479177000 | 1.180299000  | -3.560598000 |
| H | -2.263850000 | -0.058107000 | -4.566437000 |
| H | -0.883964000 | 0.841641000  | -5.188950000 |
| C | -0.146441000 | -1.813200000 | -4.794091000 |
| H | 0.599597000  | -2.546575000 | -4.472349000 |
| H | 0.182196000  | -1.391082000 | -5.749195000 |
| H | -1.092031000 | -2.340267000 | -4.965201000 |
| C | 0.426099000  | 2.193285000  | -1.185190000 |
| O | -0.237632000 | 1.506730000  | -0.110625000 |
| C | 1.737924000  | 2.801391000  | -0.710105000 |
| C | 1.797280000  | 3.535648000  | 0.483928000  |
| C | 2.902493000  | 2.663881000  | -1.475629000 |
| C | 2.997771000  | 4.107771000  | 0.905819000  |
| H | 0.899060000  | 3.658946000  | 1.083638000  |
| C | 4.103546000  | 3.243860000  | -1.059953000 |
| H | 2.871076000  | 2.103915000  | -2.408573000 |
| C | 4.154461000  | 3.963851000  | 0.134511000  |
| H | 3.030144000  | 4.672656000  | 1.833406000  |
| H | 4.997408000  | 3.129198000  | -1.666657000 |
| H | 5.087789000  | 4.412459000  | 0.462094000  |
| H | 0.657328000  | 1.477858000  | -1.986988000 |
| C | -0.519019000 | 3.267036000  | -1.735450000 |
| H | -0.731011000 | 4.014537000  | -0.963956000 |
| H | -0.067584000 | 3.780261000  | -2.591468000 |
| H | -1.467879000 | 2.822901000  | -2.055548000 |
| H | 0.497743000  | 0.955217000  | 0.841915000  |

(A'')

|    |              |              |              |
|----|--------------|--------------|--------------|
| Ru | -0.746106000 | -0.624164000 | -0.144445000 |
| O  | -0.228059000 | -1.033666000 | 3.694931000  |
| O  | 3.231002000  | -0.878081000 | 0.844836000  |
| N  | 0.074966000  | 0.258374000  | 1.815660000  |
| N  | -2.806873000 | 0.588250000  | 1.725134000  |
| N  | -3.334148000 | 1.071128000  | -0.278746000 |
| N  | -4.270999000 | 1.696857000  | 0.505353000  |
| C  | -2.428479000 | 0.370655000  | 0.425020000  |
| C  | -3.927300000 | 1.389294000  | 1.719477000  |
| H  | -4.447322000 | 1.711483000  | 2.610393000  |
| C  | -3.388224000 | 1.280868000  | -1.734421000 |

|   |              |              |              |
|---|--------------|--------------|--------------|
| H | -4.237727000 | 0.706734000  | -2.120870000 |
| H | -2.460199000 | 0.864764000  | -2.123665000 |
| C | -3.520054000 | 2.757532000  | -2.094906000 |
| H | -3.537356000 | 2.857079000  | -3.184803000 |
| H | -2.667532000 | 3.322830000  | -1.709191000 |
| H | -4.442606000 | 3.183495000  | -1.694014000 |
| C | -2.205548000 | -0.020118000 | 2.904215000  |
| H | -2.699013000 | -0.968594000 | 3.136417000  |
| H | -2.368014000 | 0.648541000  | 3.756453000  |
| C | -0.703785000 | -0.311983000 | 2.845084000  |
| C | 1.553475000  | 0.327514000  | 2.106179000  |
| H | 1.655235000  | 0.667017000  | 3.141717000  |
| H | 1.940584000  | 1.102672000  | 1.444496000  |
| C | 2.356333000  | -0.911105000 | 1.905254000  |
| C | 2.539358000  | -2.068195000 | 2.610729000  |
| H | 2.005867000  | -2.351077000 | 3.506104000  |
| C | 3.576659000  | -2.796876000 | 1.945532000  |
| H | 3.991824000  | -3.753209000 | 2.231704000  |
| C | 3.962942000  | -2.026842000 | 0.888240000  |
| H | 4.721417000  | -2.130645000 | 0.126955000  |
| C | -1.697105000 | -2.746593000 | -0.109823000 |
| C | -0.357683000 | -2.826153000 | 0.327707000  |
| H | -0.137742000 | -3.207503000 | 1.319655000  |
| C | 0.736976000  | -2.504883000 | -0.542441000 |
| H | 1.745909000  | -2.685237000 | -0.189467000 |
| C | 0.528018000  | -1.971250000 | -1.817671000 |
| C | -0.832352000 | -1.652847000 | -2.166731000 |
| H | -1.047154000 | -1.154869000 | -3.104091000 |
| C | -1.913337000 | -2.092408000 | -1.362604000 |
| H | -2.929761000 | -1.908185000 | -1.696641000 |
| C | -2.842889000 | -3.280754000 | 0.708400000  |
| H | -3.101838000 | -4.291723000 | 0.369535000  |
| H | -3.740591000 | -2.662795000 | 0.605699000  |
| H | -2.579676000 | -3.350362000 | 1.768117000  |
| C | 1.706207000  | -1.773294000 | -2.765326000 |
| H | 2.470663000  | -1.211996000 | -2.211461000 |
| C | 1.371100000  | -1.003415000 | -4.049478000 |
| H | 0.954883000  | -0.012681000 | -3.849174000 |
| H | 0.662552000  | -1.558209000 | -4.676460000 |
| H | 2.282257000  | -0.864765000 | -4.639497000 |
| C | 2.305932000  | -3.154899000 | -3.119980000 |
| H | 2.629646000  | -3.703317000 | -2.229888000 |
| H | 3.175961000  | -3.024490000 | -3.771829000 |
| H | 1.575643000  | -3.773788000 | -3.653990000 |
| C | 0.808761000  | 1.746734000  | -1.367943000 |
| O | -0.304154000 | 1.346331000  | -0.586180000 |

|   |              |             |              |
|---|--------------|-------------|--------------|
| C | 1.699037000  | 2.702139000 | -0.575433000 |
| C | 1.132141000  | 3.742040000 | 0.177768000  |
| C | 3.094065000  | 2.580912000 | -0.607224000 |
| C | 1.941263000  | 4.634850000 | 0.881577000  |
| H | 0.051006000  | 3.849776000 | 0.204259000  |
| C | 3.907327000  | 3.475778000 | 0.093745000  |
| H | 3.550116000  | 1.778760000 | -1.183675000 |
| C | 3.332524000  | 4.504665000 | 0.841227000  |
| H | 1.487941000  | 5.438227000 | 1.456415000  |
| H | 4.987765000  | 3.366348000 | 0.057060000  |
| H | 3.962490000  | 5.201496000 | 1.386707000  |
| H | 1.425744000  | 0.876885000 | -1.641879000 |
| C | 0.323900000  | 2.422610000 | -2.662438000 |
| H | -0.245052000 | 3.327586000 | -2.425218000 |
| H | 1.166455000  | 2.712359000 | -3.300808000 |
| H | -0.327432000 | 1.748828000 | -3.231796000 |
| H | -0.232767000 | 1.169008000 | 1.449402000  |

(TS<sup>A</sup>B<sup>\*</sup>)

|    |              |              |              |
|----|--------------|--------------|--------------|
| Ru | 0.420917000  | -0.502406000 | 0.430453000  |
| O  | -0.667026000 | -3.313127000 | -1.733645000 |
| O  | -3.703511000 | -0.724753000 | 0.037012000  |
| N  | -0.570831000 | -1.007446000 | -1.502867000 |
| N  | 2.383840000  | -1.538918000 | -1.672782000 |
| N  | 3.452082000  | -0.338651000 | -0.283202000 |
| N  | 4.392186000  | -0.782965000 | -1.178703000 |
| C  | 2.197741000  | -0.784087000 | -0.542346000 |
| C  | 3.712760000  | -1.503612000 | -2.017614000 |
| H  | 4.130440000  | -2.013641000 | -2.873790000 |
| C  | 3.901594000  | 0.512890000  | 0.831068000  |
| H  | 4.091078000  | -0.131424000 | 1.697814000  |
| H  | 3.062230000  | 1.167328000  | 1.068950000  |
| C  | 5.150548000  | 1.320854000  | 0.493145000  |
| H  | 5.398867000  | 1.951015000  | 1.353194000  |
| H  | 4.985639000  | 1.968745000  | -0.372485000 |
| H  | 6.002681000  | 0.673312000  | 0.279525000  |
| C  | 1.377838000  | -2.301014000 | -2.402818000 |
| H  | 1.680983000  | -3.348716000 | -2.455576000 |
| H  | 1.311016000  | -1.903715000 | -3.424026000 |
| C  | -0.031569000 | -2.283324000 | -1.811174000 |
| C  | -2.062919000 | -0.880808000 | -1.738637000 |
| H  | -2.233752000 | -1.233815000 | -2.761853000 |
| H  | -2.259975000 | 0.191239000  | -1.714019000 |
| C  | -3.025219000 | -1.556458000 | -0.825806000 |
| C  | -3.521883000 | -2.825154000 | -0.714164000 |
| H  | -3.184368000 | -3.685425000 | -1.271904000 |

|   |              |              |              |
|---|--------------|--------------|--------------|
| C | -4.548039000 | -2.783065000 | 0.282336000  |
| H | -5.160348000 | -3.604783000 | 0.626497000  |
| C | -4.617493000 | -1.487614000 | 0.700725000  |
| H | -5.242211000 | -0.963977000 | 1.408557000  |
| C | 0.065830000  | -2.301714000 | 1.976842000  |
| C | -1.157047000 | -1.602211000 | 1.791123000  |
| H | -2.023068000 | -2.158467000 | 1.452501000  |
| C | -1.290226000 | -0.217000000 | 2.046828000  |
| H | -2.250536000 | 0.258724000  | 1.889990000  |
| C | -0.183191000 | 0.547784000  | 2.498705000  |
| C | 1.066809000  | -0.117424000 | 2.610567000  |
| H | 1.940371000  | 0.428252000  | 2.940686000  |
| C | 1.186218000  | -1.510448000 | 2.334983000  |
| H | 2.159116000  | -1.983210000 | 2.435677000  |
| C | 0.161142000  | -3.797274000 | 1.787038000  |
| H | -0.829755000 | -4.256623000 | 1.831837000  |
| H | 0.778939000  | -4.248192000 | 2.570482000  |
| H | 0.598542000  | -4.061819000 | 0.818646000  |
| C | -0.390931000 | 1.996538000  | 2.907353000  |
| H | -1.078567000 | 2.434970000  | 2.173278000  |
| C | 0.887414000  | 2.844215000  | 2.936260000  |
| H | 1.425473000  | 2.805428000  | 1.982826000  |
| H | 1.571321000  | 2.525833000  | 3.731929000  |
| H | 0.632460000  | 3.889800000  | 3.136056000  |
| C | -1.090972000 | 2.028436000  | 4.286704000  |
| H | -2.040273000 | 1.483363000  | 4.274370000  |
| H | -1.299824000 | 3.064115000  | 4.574370000  |
| H | -0.454346000 | 1.584907000  | 5.061004000  |
| C | 0.629781000  | 1.945521000  | -1.784495000 |
| O | 0.680487000  | 1.075410000  | -2.694874000 |
| C | -0.655123000 | 2.718096000  | -1.577744000 |
| C | -1.658226000 | 2.604098000  | -2.553261000 |
| C | -0.847839000 | 3.607040000  | -0.508603000 |
| C | -2.835027000 | 3.345665000  | -2.451997000 |
| H | -1.483610000 | 1.954781000  | -3.404985000 |
| C | -2.026084000 | 4.345375000  | -0.404826000 |
| H | -0.077751000 | 3.726648000  | 0.246449000  |
| C | -3.024787000 | 4.213589000  | -1.374124000 |
| H | -3.596548000 | 3.259145000  | -3.221839000 |
| H | -2.162036000 | 5.032936000  | 0.425338000  |
| H | -3.938417000 | 4.795828000  | -1.296745000 |
| H | 0.555407000  | 1.067773000  | -0.468511000 |
| C | 1.924809000  | 2.669543000  | -1.421547000 |
| H | 2.044673000  | 3.490863000  | -2.139893000 |
| H | 1.923828000  | 3.102166000  | -0.418885000 |
| H | 2.769811000  | 1.990077000  | -1.537788000 |



H -0.123855000 -0.262579000 -2.089795000

(B')

Ru -1.398480000 -0.465507000 -0.033891000  
O -0.485801000 0.993495000 -3.208378000  
O -0.657161000 3.489260000 0.539668000  
N 0.300345000 0.566632000 -1.067970000  
N 0.349672000 -2.199204000 -1.731426000  
N 0.046706000 -3.224070000 0.107577000  
N 0.891796000 -4.026481000 -0.623595000  
C -0.310777000 -2.090582000 -0.529025000  
C 1.060991000 -3.374184000 -1.735423000  
H 1.671405000 -3.711939000 -2.560574000  
C -0.313006000 -3.649339000 1.464066000  
H -0.776563000 -4.637317000 1.382421000  
H -1.058840000 -2.934984000 1.812720000  
C 0.893128000 -3.687230000 2.399548000  
H 0.574126000 -4.025936000 3.390503000  
H 1.337317000 -2.691818000 2.500732000  
H 1.652606000 -4.380734000 2.028287000  
C 0.248642000 -1.239154000 -2.822204000  
H -0.534611000 -1.532483000 -3.526798000  
H 1.201483000 -1.231518000 -3.364010000  
C -0.044468000 0.204890000 -2.398725000  
C 0.655253000 2.017807000 -0.867206000  
H 1.295093000 2.304121000 -1.708662000  
H 1.253118000 2.038618000 0.045643000  
C -0.444094000 3.010380000 -0.729490000  
C -1.237253000 3.686922000 -1.613564000  
H -1.266320000 3.528795000 -2.681755000  
C -1.993697000 4.630367000 -0.847638000  
H -2.718812000 5.342422000 -1.216315000  
C -1.598540000 4.469704000 0.448031000  
H -1.856229000 4.961845000 1.373715000  
C -3.515218000 -0.731690000 -1.212090000  
C -3.276810000 0.640864000 -1.020016000  
H -3.246648000 1.304065000 -1.878918000  
C -3.085758000 1.204412000 0.278949000  
H -2.955335000 2.276471000 0.367580000  
C -3.072705000 0.403698000 1.435605000  
C -3.173341000 -1.013003000 1.243335000  
H -3.134998000 -1.681728000 2.094735000  
C -3.380378000 -1.556850000 -0.051936000  
H -3.469289000 -2.634448000 -0.156934000  
C -3.860405000 -1.308768000 -2.560239000  
H -4.949506000 -1.363304000 -2.684931000

|   |              |              |              |
|---|--------------|--------------|--------------|
| H | -3.469498000 | -2.324894000 | -2.676201000 |
| H | -3.468097000 | -0.687577000 | -3.371192000 |
| C | -2.998828000 | 1.039351000  | 2.813554000  |
| H | -2.533129000 | 2.023350000  | 2.678845000  |
| C | -2.156893000 | 0.256677000  | 3.831871000  |
| H | -1.142271000 | 0.083761000  | 3.459696000  |
| H | -2.607209000 | -0.712519000 | 4.077901000  |
| H | -2.089477000 | 0.823754000  | 4.766004000  |
| C | -4.435947000 | 1.261278000  | 3.337875000  |
| H | -5.030234000 | 1.866014000  | 2.644609000  |
| H | -4.407955000 | 1.778712000  | 4.302631000  |
| H | -4.954325000 | 0.306179000  | 3.484441000  |
| C | 3.937378000  | -0.838745000 | 0.134470000  |
| O | 2.865210000  | -0.687915000 | -0.458474000 |
| C | 4.864264000  | 0.303598000  | 0.351856000  |
| C | 4.611973000  | 1.523387000  | -0.301026000 |
| C | 5.986557000  | 0.199729000  | 1.192448000  |
| C | 5.456237000  | 2.612726000  | -0.116329000 |
| H | 3.757526000  | 1.592922000  | -0.965462000 |
| C | 6.826226000  | 1.295109000  | 1.385497000  |
| H | 6.204297000  | -0.730791000 | 1.706403000  |
| C | 6.563322000  | 2.501102000  | 0.731668000  |
| H | 5.258895000  | 3.547937000  | -0.632143000 |
| H | 7.686016000  | 1.207647000  | 2.042812000  |
| H | 7.222125000  | 3.352159000  | 0.878507000  |
| H | -0.356232000 | -0.464642000 | 1.178308000  |
| C | 4.323403000  | -2.212649000 | 0.644446000  |
| H | 5.309510000  | -2.510268000 | 0.270957000  |
| H | 4.379094000  | -2.216370000 | 1.739789000  |
| H | 3.575315000  | -2.940232000 | 0.325773000  |
| H | 1.107622000  | 0.021350000  | -0.742380000 |

(D')

|    |              |              |              |
|----|--------------|--------------|--------------|
| Ru | 0.305984000  | 0.220333000  | 0.113556000  |
| O  | -0.351486000 | -3.388095000 | 0.521028000  |
| O  | -3.220584000 | -0.742360000 | -1.680213000 |
| N  | 0.042050000  | -1.711155000 | -1.026328000 |
| N  | 2.713948000  | -1.554872000 | -0.089801000 |
| N  | 3.363609000  | 0.434947000  | -0.477745000 |
| N  | 4.486629000  | -0.348751000 | -0.605747000 |
| C  | 2.251790000  | -0.255247000 | -0.152808000 |
| C  | 4.065088000  | -1.552436000 | -0.361244000 |
| H  | 4.686686000  | -2.436679000 | -0.364488000 |
| C  | 3.486602000  | 1.866476000  | -0.782188000 |
| H  | 4.283481000  | 2.261912000  | -0.145593000 |
| H  | 2.539332000  | 2.319354000  | -0.489155000 |

|   |              |              |              |
|---|--------------|--------------|--------------|
| C | 3.787840000  | 2.114441000  | -2.258868000 |
| H | 3.899050000  | 3.189571000  | -2.431398000 |
| H | 2.973121000  | 1.746932000  | -2.891361000 |
| H | 4.717732000  | 1.621394000  | -2.554916000 |
| C | 1.918289000  | -2.691516000 | 0.355517000  |
| H | 1.973234000  | -2.801390000 | 1.442486000  |
| H | 2.333467000  | -3.603674000 | -0.088426000 |
| C | 0.432019000  | -2.636949000 | -0.013713000 |
| C | -1.207994000 | -2.078597000 | -1.793959000 |
| H | -1.130873000 | -3.144306000 | -2.032648000 |
| H | -1.151923000 | -1.504773000 | -2.720953000 |
| C | -2.521404000 | -1.801207000 | -1.154921000 |
| C | -3.290199000 | -2.443073000 | -0.224485000 |
| H | -3.001094000 | -3.318399000 | 0.338218000  |
| C | -4.532182000 | -1.735330000 | -0.161123000 |
| H | -5.386300000 | -1.966241000 | 0.460000000  |
| C | -4.436610000 | -0.719860000 | -1.067051000 |
| H | -5.115912000 | 0.050897000  | -1.398619000 |
| C | 0.105053000  | 0.358609000  | 2.541915000  |
| C | -1.126987000 | -0.075980000 | 2.030242000  |
| H | -1.559874000 | -1.006006000 | 2.386474000  |
| C | -1.850288000 | 0.682263000  | 1.054583000  |
| H | -2.816521000 | 0.315461000  | 0.727157000  |
| C | -1.355918000 | 1.891137000  | 0.536333000  |
| C | -0.036054000 | 2.275152000  | 0.950159000  |
| H | 0.416721000  | 3.174614000  | 0.550438000  |
| C | 0.671247000  | 1.519922000  | 1.919455000  |
| H | 1.658797000  | 1.853955000  | 2.224133000  |
| C | 0.815570000  | -0.354995000 | 3.662203000  |
| H | 0.615012000  | 0.145627000  | 4.618040000  |
| H | 1.901032000  | -0.354041000 | 3.517955000  |
| H | 0.474831000  | -1.390321000 | 3.756448000  |
| C | -2.207398000 | 2.753698000  | -0.379523000 |
| H | -2.945353000 | 2.086251000  | -0.840271000 |
| C | -1.428612000 | 3.443693000  | -1.509589000 |
| H | -0.878370000 | 2.717924000  | -2.116535000 |
| H | -0.717407000 | 4.185198000  | -1.126288000 |
| H | -2.126414000 | 3.978589000  | -2.161861000 |
| C | -2.970097000 | 3.789302000  | 0.478326000  |
| H | -3.572914000 | 3.306849000  | 1.255056000  |
| H | -3.640661000 | 4.379281000  | -0.155083000 |
| H | -2.276685000 | 4.482727000  | 0.969032000  |
| H | 0.505140000  | 0.786448000  | -1.369697000 |
| H | 0.793758000  | -1.566361000 | -1.699348000 |

Hydrogenation of olefine

(I')

|    |              |              |              |
|----|--------------|--------------|--------------|
| Ru | 2.035887000  | -0.753180000 | -0.249594000 |
| O  | 0.640376000  | -1.540545000 | 2.960248000  |
| O  | 2.625616000  | 2.436526000  | 2.182840000  |
| N  | 0.453363000  | -0.068488000 | 1.173128000  |
| N  | -0.552939000 | -2.244328000 | -0.375281000 |
| N  | 0.021794000  | -1.818689000 | -2.378574000 |
| N  | -1.182171000 | -2.476383000 | -2.475667000 |
| C  | 0.448335000  | -1.653541000 | -1.109397000 |
| C  | -1.509796000 | -2.714937000 | -1.241303000 |
| H  | -2.410968000 | -3.223519000 | -0.931559000 |
| C  | 0.648538000  | -1.339639000 | -3.615047000 |
| H  | 0.842736000  | -2.214429000 | -4.243836000 |
| H  | 1.600575000  | -0.899953000 | -3.316605000 |
| C  | -0.225921000 | -0.324834000 | -4.348713000 |
| H  | 0.274154000  | -0.015118000 | -5.272052000 |
| H  | -0.396282000 | 0.564307000  | -3.733097000 |
| H  | -1.193343000 | -0.761379000 | -4.610370000 |
| C  | -0.567755000 | -2.362021000 | 1.076977000  |
| H  | -0.206457000 | -3.345144000 | 1.390493000  |
| H  | -1.603655000 | -2.250770000 | 1.415371000  |
| C  | 0.259997000  | -1.313378000 | 1.830042000  |
| C  | 0.591308000  | 1.126753000  | 2.081348000  |
| H  | -0.171909000 | 1.020927000  | 2.859196000  |
| H  | 0.331550000  | 1.984742000  | 1.458227000  |
| C  | 1.910337000  | 1.392085000  | 2.715508000  |
| C  | 2.551817000  | 0.916622000  | 3.824714000  |
| H  | 2.207732000  | 0.106863000  | 4.451505000  |
| C  | 3.737915000  | 1.702552000  | 3.982047000  |
| H  | 4.484160000  | 1.614685000  | 4.759362000  |
| C  | 3.728793000  | 2.609708000  | 2.963425000  |
| H  | 4.383107000  | 3.420154000  | 2.679624000  |
| C  | 3.476534000  | -2.589763000 | 0.432884000  |
| C  | 3.716076000  | -1.492006000 | 1.280017000  |
| H  | 3.587107000  | -1.605994000 | 2.351764000  |
| C  | 4.136886000  | -0.222504000 | 0.779768000  |
| H  | 4.357778000  | 0.569012000  | 1.486473000  |
| C  | 4.275532000  | 0.014870000  | -0.600059000 |
| C  | 3.904472000  | -1.050687000 | -1.483234000 |
| H  | 3.963275000  | -0.913567000 | -2.556231000 |
| C  | 3.509970000  | -2.314310000 | -0.969485000 |
| H  | 3.250520000  | -3.104022000 | -1.668869000 |
| C  | 3.166855000  | -3.963679000 | 0.967618000  |
| H  | 2.678748000  | -3.906847000 | 1.945609000  |
| H  | 4.090048000  | -4.543825000 | 1.093179000  |

|   |               |              |              |
|---|---------------|--------------|--------------|
| H | 2.520741000   | -4.524718000 | 0.284587000  |
| C | 4.841499000   | 1.333381000  | -1.100259000 |
| H | 4.642013000   | 2.075857000  | -0.317772000 |
| C | 4.209976000   | 1.844089000  | -2.403688000 |
| H | 3.121588000   | 1.919607000  | -2.314697000 |
| H | 4.444172000   | 1.194595000  | -3.255673000 |
| H | 4.607389000   | 2.836535000  | -2.640202000 |
| C | 6.374220000   | 1.196878000  | -1.246222000 |
| H | 6.843508000   | 0.888290000  | -0.306062000 |
| H | 6.810304000   | 2.155955000  | -1.545261000 |
| H | 6.632921000   | 0.456847000  | -2.012869000 |
| C | -2.965185000  | 1.204887000  | -0.169639000 |
| O | -2.177103000  | 0.280470000  | 0.112964000  |
| C | -2.439814000  | 2.532627000  | -0.604093000 |
| C | -1.154471000  | 2.606470000  | -1.170183000 |
| C | -3.178081000  | 3.717345000  | -0.439808000 |
| C | -0.626776000  | 3.830590000  | -1.571793000 |
| H | -0.582280000  | 1.694584000  | -1.309168000 |
| C | -2.641256000  | 4.944505000  | -0.827281000 |
| H | -4.160292000  | 3.691369000  | 0.021059000  |
| C | -1.368731000  | 5.003446000  | -1.399162000 |
| H | 0.361387000   | 3.872297000  | -2.021227000 |
| H | -3.216129000  | 5.854222000  | -0.681720000 |
| H | -0.956273000  | 5.959174000  | -1.709538000 |
| H | 1.485727000   | 0.481601000  | -1.104479000 |
| C | -4.418683000  | 1.015437000  | -0.103944000 |
| H | -0.357681000  | 0.127848000  | 0.564803000  |
| C | -4.961384000  | -0.111555000 | 0.415122000  |
| C | -6.370000000  | -0.458985000 | 0.534462000  |
| C | -6.712619000  | -1.664009000 | 1.179939000  |
| C | -7.410321000  | 0.352162000  | 0.033962000  |
| C | -8.043194000  | -2.046690000 | 1.326916000  |
| H | -5.921322000  | -2.298528000 | 1.572216000  |
| C | -8.738088000  | -0.030845000 | 0.179541000  |
| H | -7.177808000  | 1.282816000  | -0.474642000 |
| C | -9.059535000  | -1.230223000 | 0.826677000  |
| H | -8.288031000  | -2.977642000 | 1.829587000  |
| H | -9.528318000  | 0.602881000  | -0.212050000 |
| H | -10.098949000 | -1.524921000 | 0.938086000  |
| H | -4.260170000  | -0.850603000 | 0.800699000  |
| H | -5.046534000  | 1.804546000  | -0.501344000 |

#### 1,4-TS<sup>FJ</sup>

|    |              |              |              |
|----|--------------|--------------|--------------|
| Ru | -0.923307000 | -0.593067000 | 0.642185000  |
| O  | -1.029812000 | -3.717439000 | -1.373781000 |
| O  | -3.191748000 | -0.089603000 | -2.693502000 |

|   |              |              |              |
|---|--------------|--------------|--------------|
| N | -0.329975000 | -1.506107000 | -1.316037000 |
| N | 1.503505000  | -2.370349000 | 0.797612000  |
| N | 1.793864000  | -0.742553000 | 2.137161000  |
| N | 2.903020000  | -1.538411000 | 2.284097000  |
| C | 0.899905000  | -1.216814000 | 1.238626000  |
| C | 2.704449000  | -2.512541000 | 1.448629000  |
| H | 3.389041000  | -3.332068000 | 1.283859000  |
| C | 1.684696000  | 0.451824000  | 2.986869000  |
| H | 1.315988000  | 0.134313000  | 3.969445000  |
| H | 0.922964000  | 1.079170000  | 2.521913000  |
| C | 3.013201000  | 1.186557000  | 3.142051000  |
| H | 2.853140000  | 2.083520000  | 3.749115000  |
| H | 3.415332000  | 1.487420000  | 2.171174000  |
| H | 3.754275000  | 0.559162000  | 3.641320000  |
| C | 0.977471000  | -3.322196000 | -0.174846000 |
| H | 0.712000000  | -4.259301000 | 0.320594000  |
| H | 1.766995000  | -3.529710000 | -0.907106000 |
| C | -0.247704000 | -2.880168000 | -0.977220000 |
| C | -1.060891000 | -1.237816000 | -2.606500000 |
| H | -0.660449000 | -1.941401000 | -3.343798000 |
| H | -0.761052000 | -0.232683000 | -2.908519000 |
| C | -2.548628000 | -1.302744000 | -2.622249000 |
| C | -3.464058000 | -2.311573000 | -2.732991000 |
| H | -3.241585000 | -3.367977000 | -2.721232000 |
| C | -4.746416000 | -1.690817000 | -2.870934000 |
| H | -5.701737000 | -2.181878000 | -2.993424000 |
| C | -4.521474000 | -0.346076000 | -2.845408000 |
| H | -5.158835000 | 0.519376000  | -2.945188000 |
| C | -1.986463000 | -1.715527000 | 2.459707000  |
| C | -2.760693000 | -1.956862000 | 1.310146000  |
| H | -2.950790000 | -2.976142000 | 0.988568000  |
| C | -3.370772000 | -0.880677000 | 0.594350000  |
| H | -4.026040000 | -1.119407000 | -0.236550000 |
| C | -3.190098000 | 0.458841000  | 0.963789000  |
| C | -2.224547000 | 0.712012000  | 1.995804000  |
| H | -1.984218000 | 1.734148000  | 2.268238000  |
| C | -1.684402000 | -0.348168000 | 2.761713000  |
| H | -1.051425000 | -0.121817000 | 3.612271000  |
| C | -1.462705000 | -2.840989000 | 3.320906000  |
| H | -2.196797000 | -3.649165000 | 3.390191000  |
| H | -1.249249000 | -2.490411000 | 4.335009000  |
| H | -0.538695000 | -3.268618000 | 2.917085000  |
| C | -4.065877000 | 1.555485000  | 0.382049000  |
| H | -4.671964000 | 1.085347000  | -0.400465000 |
| C | -3.289855000 | 2.712575000  | -0.255891000 |
| H | -2.677589000 | 2.358450000  | -1.087985000 |

|   |              |              |              |
|---|--------------|--------------|--------------|
| H | -2.631905000 | 3.215776000  | 0.460412000  |
| H | -3.989696000 | 3.462149000  | -0.641330000 |
| C | -5.030348000 | 2.060879000  | 1.478445000  |
| H | -5.611127000 | 1.242265000  | 1.917303000  |
| H | -5.733439000 | 2.783948000  | 1.051636000  |
| H | -4.486783000 | 2.563993000  | 2.287084000  |
| C | 2.905413000  | 0.260531000  | -1.188979000 |
| O | 2.260172000  | -0.719410000 | -1.658862000 |
| C | 4.397149000  | 0.208298000  | -1.216742000 |
| C | 5.208796000  | 1.308808000  | -0.887305000 |
| C | 5.015759000  | -0.990170000 | -1.614205000 |
| C | 6.597616000  | 1.204863000  | -0.937553000 |
| H | 4.764887000  | 2.260744000  | -0.615491000 |
| C | 6.402519000  | -1.094146000 | -1.662386000 |
| H | 4.386274000  | -1.827717000 | -1.894386000 |
| C | 7.198291000  | 0.003206000  | -1.320007000 |
| H | 7.211599000  | 2.064753000  | -0.686106000 |
| H | 6.866252000  | -2.026458000 | -1.972141000 |
| H | 8.281024000  | -0.075169000 | -1.359398000 |
| C | 2.230652000  | 1.397952000  | -0.632620000 |
| C | 0.860879000  | 1.622759000  | -0.843143000 |
| C | 0.319704000  | 2.989317000  | -0.569749000 |
| C | -0.286751000 | 3.705052000  | -1.612328000 |
| C | 0.475100000  | 3.615919000  | 0.675797000  |
| C | -0.713632000 | 5.019549000  | -1.420035000 |
| H | -0.406039000 | 3.237147000  | -2.586576000 |
| C | 0.036463000  | 4.925089000  | 0.874219000  |
| H | 0.953057000  | 3.080043000  | 1.491672000  |
| C | -0.557864000 | 5.632092000  | -0.174979000 |
| H | -1.166457000 | 5.564568000  | -2.243299000 |
| H | 0.165303000  | 5.397540000  | 1.844181000  |
| H | -0.893180000 | 6.653841000  | -0.022931000 |
| H | 0.464692000  | 1.167764000  | -1.750380000 |
| H | 2.785318000  | 2.114559000  | -0.040236000 |
| H | 0.077714000  | 0.761690000  | -0.011512000 |
| H | 0.637614000  | -1.109196000 | -1.421999000 |

(J')

|    |              |              |              |
|----|--------------|--------------|--------------|
| Ru | -1.033285000 | 0.904437000  | -0.415526000 |
| O  | -3.989889000 | 1.105890000  | 2.222308000  |
| O  | -2.964595000 | -2.710341000 | 0.166819000  |
| N  | -1.914051000 | 0.307201000  | 1.620012000  |
| N  | -0.943038000 | 3.031364000  | 1.749750000  |
| N  | 0.847206000  | 3.166608000  | 0.607444000  |
| N  | 0.974452000  | 4.107479000  | 1.599410000  |
| C  | -0.314736000 | 2.490801000  | 0.654506000  |

|   |              |              |              |
|---|--------------|--------------|--------------|
| C | -0.126124000 | 4.005440000  | 2.279467000  |
| H | -0.378226000 | 4.604309000  | 3.143113000  |
| C | 1.997163000  | 2.978787000  | -0.292777000 |
| H | 2.136517000  | 3.921244000  | -0.832366000 |
| H | 1.703083000  | 2.204221000  | -0.998996000 |
| C | 3.260124000  | 2.584634000  | 0.467277000  |
| H | 4.084746000  | 2.460702000  | -0.241139000 |
| H | 3.115346000  | 1.633557000  | 0.985134000  |
| H | 3.535285000  | 3.357253000  | 1.189810000  |
| C | -2.299630000 | 2.748506000  | 2.198161000  |
| H | -3.013378000 | 3.402316000  | 1.687396000  |
| H | -2.360951000 | 2.978818000  | 3.266925000  |
| C | -2.814555000 | 1.318064000  | 2.022391000  |
| C | -2.380032000 | -1.104572000 | 1.875432000  |
| H | -2.750602000 | -1.131232000 | 2.905599000  |
| H | -1.478220000 | -1.714547000 | 1.812640000  |
| C | -3.405094000 | -1.673227000 | 0.955198000  |
| C | -4.750372000 | -1.505047000 | 0.774704000  |
| H | -5.368763000 | -0.779304000 | 1.280679000  |
| C | -5.162884000 | -2.482293000 | -0.186392000 |
| H | -6.162703000 | -2.648144000 | -0.562731000 |
| C | -4.043449000 | -3.188563000 | -0.514368000 |
| H | -3.855065000 | -4.032217000 | -1.160912000 |
| C | -2.134058000 | 2.240282000  | -1.935975000 |
| C | -2.968833000 | 1.154434000  | -1.592574000 |
| H | -3.940815000 | 1.343299000  | -1.147916000 |
| C | -2.597558000 | -0.197790000 | -1.888914000 |
| H | -3.311406000 | -0.983769000 | -1.672505000 |
| C | -1.347134000 | -0.521055000 | -2.426971000 |
| C | -0.420794000 | 0.570959000  | -2.583903000 |
| H | 0.594070000  | 0.367108000  | -2.901526000 |
| C | -0.822025000 | 1.915021000  | -2.412011000 |
| H | -0.116333000 | 2.713610000  | -2.616318000 |
| C | -2.584488000 | 3.670455000  | -1.800168000 |
| H | -2.949825000 | 4.036711000  | -2.767779000 |
| H | -1.766261000 | 4.326898000  | -1.488493000 |
| H | -3.405684000 | 3.765679000  | -1.083493000 |
| C | -1.032022000 | -1.958960000 | -2.830129000 |
| H | -1.223169000 | -2.582848000 | -1.947972000 |
| C | 0.418255000  | -2.185583000 | -3.273400000 |
| H | 1.128720000  | -1.907879000 | -2.489943000 |
| H | 0.655625000  | -1.621820000 | -4.184506000 |
| H | 0.566950000  | -3.245415000 | -3.503542000 |
| C | -2.005680000 | -2.402681000 | -3.946691000 |
| H | -3.053282000 | -2.327720000 | -3.637945000 |
| H | -1.808818000 | -3.445723000 | -4.215839000 |



|   |              |              |              |
|---|--------------|--------------|--------------|
| H | -1.872763000 | -1.793734000 | -4.848575000 |
| C | 1.398543000  | -0.954204000 | 0.416981000  |
| O | 0.508541000  | 0.027649000  | 0.701473000  |
| C | 1.295987000  | -2.117431000 | 1.355212000  |
| C | 1.254587000  | -1.889836000 | 2.742826000  |
| C | 1.205102000  | -3.439377000 | 0.892639000  |
| C | 1.140399000  | -2.952377000 | 3.638736000  |
| H | 1.337603000  | -0.871791000 | 3.114404000  |
| C | 1.085731000  | -4.503971000 | 1.789409000  |
| H | 1.221793000  | -3.632420000 | -0.176231000 |
| C | 1.053987000  | -4.264333000 | 3.163963000  |
| H | 1.128237000  | -2.759530000 | 4.708231000  |
| H | 1.015716000  | -5.520582000 | 1.412364000  |
| H | 0.965657000  | -5.092629000 | 3.861117000  |
| C | 2.346079000  | -0.842117000 | -0.542545000 |
| H | 2.316134000  | 0.056305000  | -1.157974000 |
| H | -0.954220000 | 0.389533000  | 1.979374000  |
| C | 3.537942000  | -1.739967000 | -0.788208000 |
| H | 3.532988000  | -2.579000000 | -0.086091000 |
| H | 3.494099000  | -2.174747000 | -1.797771000 |
| C | 4.837349000  | -0.958573000 | -0.649287000 |
| C | 5.486790000  | -0.430625000 | -1.771851000 |
| C | 5.385227000  | -0.713863000 | 0.618234000  |
| C | 6.653009000  | 0.327413000  | -1.635178000 |
| H | 5.083792000  | -0.624468000 | -2.764221000 |
| C | 6.551893000  | 0.037915000  | 0.759418000  |
| H | 4.893712000  | -1.121718000 | 1.498896000  |
| C | 7.188521000  | 0.564552000  | -0.368065000 |
| H | 7.148154000  | 0.721845000  | -2.518662000 |
| H | 6.969202000  | 0.207531000  | 1.748540000  |
| H | 8.099840000  | 1.146021000  | -0.259598000 |

**TS<sup>J1b'</sup>**

|    |              |              |              |
|----|--------------|--------------|--------------|
| Ru | -0.941333000 | 0.766814000  | -0.686675000 |
| O  | -3.600306000 | -1.878672000 | 1.562782000  |
| O  | -1.738343000 | -3.209418000 | -1.779857000 |
| N  | -1.790129000 | -0.887127000 | 0.515035000  |
| N  | -3.464011000 | 1.549280000  | 0.822848000  |
| N  | -2.092676000 | 3.169863000  | 0.917141000  |
| N  | -3.175175000 | 3.564990000  | 1.663504000  |
| C  | -2.234995000 | 1.941737000  | 0.379130000  |
| C  | -3.993559000 | 2.557191000  | 1.592397000  |
| H  | -4.964274000 | 2.511786000  | 2.064736000  |
| C  | -0.917670000 | 4.053196000  | 0.920165000  |
| H  | -1.252963000 | 5.031995000  | 0.564605000  |
| H  | -0.217706000 | 3.633469000  | 0.198838000  |

|   |              |              |              |
|---|--------------|--------------|--------------|
| C | -0.286124000 | 4.156633000  | 2.306969000  |
| H | 0.557460000  | 4.853435000  | 2.267242000  |
| H | 0.081520000  | 3.180780000  | 2.635393000  |
| H | -1.008885000 | 4.535453000  | 3.034456000  |
| C | -4.047349000 | 0.234642000  | 0.593263000  |
| H | -4.320556000 | 0.132811000  | -0.463482000 |
| H | -4.951930000 | 0.146428000  | 1.195394000  |
| C | -3.125673000 | -0.931506000 | 0.969299000  |
| C | -1.192339000 | -2.274798000 | 0.435135000  |
| H | -1.146240000 | -2.677715000 | 1.449973000  |
| H | -0.166688000 | -2.138864000 | 0.086536000  |
| C | -1.918859000 | -3.261707000 | -0.413470000 |
| C | -2.733784000 | -4.312355000 | -0.108525000 |
| H | -3.057748000 | -4.588793000 | 0.884217000  |
| C | -3.078878000 | -4.950314000 | -1.343517000 |
| H | -3.707612000 | -5.818986000 | -1.478543000 |
| C | -2.452756000 | -4.244106000 | -2.321472000 |
| H | -2.401621000 | -4.337674000 | -3.395643000 |
| C | -1.045899000 | 2.220711000  | -2.537927000 |
| C | -1.713061000 | 0.993612000  | -2.822157000 |
| H | -2.754737000 | 1.002014000  | -3.124586000 |
| C | -1.017751000 | -0.237536000 | -2.723250000 |
| H | -1.556205000 | -1.161442000 | -2.902189000 |
| C | 0.380932000  | -0.305791000 | -2.424376000 |
| C | 0.988172000  | 0.902880000  | -2.031847000 |
| H | 2.011685000  | 0.899046000  | -1.672054000 |
| C | 0.292940000  | 2.148260000  | -2.079208000 |
| H | 0.820200000  | 3.058821000  | -1.815169000 |
| C | -1.752920000 | 3.544814000  | -2.700560000 |
| H | -2.564898000 | 3.461961000  | -3.428450000 |
| H | -1.056627000 | 4.311500000  | -3.053286000 |
| H | -2.186169000 | 3.895983000  | -1.759093000 |
| C | 1.141988000  | -1.612028000 | -2.584225000 |
| H | 0.464306000  | -2.417423000 | -2.283262000 |
| C | 2.419622000  | -1.703597000 | -1.739679000 |
| H | 2.226399000  | -1.498690000 | -0.681724000 |
| H | 3.194609000  | -1.007643000 | -2.079837000 |
| H | 2.837464000  | -2.712309000 | -1.818226000 |
| C | 1.460307000  | -1.819047000 | -4.083669000 |
| H | 0.552930000  | -1.813312000 | -4.697828000 |
| H | 1.959009000  | -2.783118000 | -4.228457000 |
| H | 2.128379000  | -1.033937000 | -4.456780000 |
| C | 1.172228000  | 0.374085000  | 1.717148000  |
| O | -0.120321000 | 0.671556000  | 1.320745000  |
| C | 1.254109000  | -0.797369000 | 2.632708000  |
| C | 0.332543000  | -0.921962000 | 3.688507000  |

|   |              |              |              |
|---|--------------|--------------|--------------|
| C | 2.212209000  | -1.809084000 | 2.455054000  |
| C | 0.377923000  | -2.019132000 | 4.547642000  |
| H | -0.407936000 | -0.142651000 | 3.845601000  |
| C | 2.255535000  | -2.907403000 | 3.315810000  |
| H | 2.915035000  | -1.743314000 | 1.630514000  |
| C | 1.340284000  | -3.015793000 | 4.364104000  |
| H | -0.333646000 | -2.093086000 | 5.365170000  |
| H | 3.000965000  | -3.682586000 | 3.161546000  |
| H | 1.375225000  | -3.870419000 | 5.033462000  |
| C | 2.187481000  | 1.175649000  | 1.343607000  |
| H | 1.931063000  | 1.991208000  | 0.669015000  |
| H | -0.996533000 | -0.262316000 | 1.260249000  |
| C | 3.635550000  | 1.116804000  | 1.767569000  |
| H | 3.909232000  | 2.095286000  | 2.189732000  |
| H | 3.774978000  | 0.385271000  | 2.567693000  |
| C | 4.575903000  | 0.805444000  | 0.608548000  |
| C | 5.314915000  | -0.383341000 | 0.574808000  |
| C | 4.716960000  | 1.706202000  | -0.459057000 |
| C | 6.161087000  | -0.674280000 | -0.499134000 |
| H | 5.242671000  | -1.081983000 | 1.405054000  |
| C | 5.558325000  | 1.419271000  | -1.535544000 |
| H | 4.183587000  | 2.655270000  | -0.435450000 |
| C | 6.281003000  | 0.222968000  | -1.561264000 |
| H | 6.732313000  | -1.598653000 | -0.499709000 |
| H | 5.664747000  | 2.136399000  | -2.345447000 |
| H | 6.943159000  | 0.001714000  | -2.393455000 |

**(1b')**

|    |              |              |              |
|----|--------------|--------------|--------------|
| Ru | 0.290536000  | 0.177983000  | 0.285251000  |
| O  | -1.703593000 | -2.995625000 | -1.599223000 |
| O  | -3.720167000 | 0.474472000  | 0.133659000  |
| N  | -0.924983000 | -0.983585000 | -0.789293000 |
| N  | 1.411493000  | -2.649559000 | 0.016517000  |
| N  | 3.089732000  | -1.356651000 | 0.112679000  |
| N  | 3.610097000  | -2.616714000 | -0.021041000 |
| C  | 1.737042000  | -1.329770000 | 0.142477000  |
| C  | 2.562240000  | -3.387185000 | -0.072666000 |
| H  | 2.588438000  | -4.462867000 | -0.171032000 |
| C  | 4.059513000  | -0.254530000 | 0.079341000  |
| H  | 4.847359000  | -0.513771000 | 0.791356000  |
| H  | 3.546151000  | 0.633315000  | 0.439261000  |
| C  | 4.634574000  | -0.041769000 | -1.320292000 |
| H  | 5.374648000  | 0.764411000  | -1.292588000 |
| H  | 3.848855000  | 0.231312000  | -2.032444000 |
| H  | 5.130265000  | -0.949317000 | -1.674935000 |
| C  | 0.052420000  | -3.172373000 | -0.039553000 |

|   |              |              |              |
|---|--------------|--------------|--------------|
| H | -0.361054000 | -3.226048000 | 0.974714000  |
| H | 0.088617000  | -4.181837000 | -0.449269000 |
| C | -0.908717000 | -2.365849000 | -0.915229000 |
| C | -2.107196000 | -0.392860000 | -1.490629000 |
| H | -2.200634000 | -0.892047000 | -2.457640000 |
| H | -1.889212000 | 0.659432000  | -1.673881000 |
| C | -3.397139000 | -0.531884000 | -0.751912000 |
| C | -4.385220000 | -1.472037000 | -0.752993000 |
| H | -4.395979000 | -2.372442000 | -1.349676000 |
| C | -5.380466000 | -1.029375000 | 0.178771000  |
| H | -6.309620000 | -1.522816000 | 0.426778000  |
| C | -4.931133000 | 0.150054000  | 0.684192000  |
| H | -5.332156000 | 0.862287000  | 1.389347000  |
| C | 0.221691000  | 1.030245000  | 2.387623000  |
| C | -1.005745000 | 1.336783000  | 1.714661000  |
| H | -1.940046000 | 0.948934000  | 2.106378000  |
| C | -1.025892000 | 2.077028000  | 0.515973000  |
| H | -1.978653000 | 2.255468000  | 0.032237000  |
| C | 0.185711000  | 2.451272000  | -0.127857000 |
| C | 1.414002000  | 2.168170000  | 0.552389000  |
| H | 2.351528000  | 2.456110000  | 0.092205000  |
| C | 1.422054000  | 1.513185000  | 1.801505000  |
| H | 2.367325000  | 1.279418000  | 2.279920000  |
| C | 0.223140000  | 0.284069000  | 3.694049000  |
| H | 0.087621000  | 0.991242000  | 4.522820000  |
| H | 1.167029000  | -0.243523000 | 3.856078000  |
| H | -0.594712000 | -0.440572000 | 3.739882000  |
| C | 0.146593000  | 3.207731000  | -1.443229000 |
| H | -0.813122000 | 2.967081000  | -1.918556000 |
| C | 1.266697000  | 2.830089000  | -2.424860000 |
| H | 1.283130000  | 1.753551000  | -2.626251000 |
| H | 2.254796000  | 3.131331000  | -2.058209000 |
| H | 1.107606000  | 3.348190000  | -3.375570000 |
| C | 0.150946000  | 4.725370000  | -1.144350000 |
| H | -0.676938000 | 5.012646000  | -0.487839000 |
| H | 0.051583000  | 5.284740000  | -2.080071000 |
| H | 1.088608000  | 5.031109000  | -0.666042000 |

### 1,2-TS<sup>1,2</sup>

|    |              |              |              |
|----|--------------|--------------|--------------|
| Ru | -0.837006000 | -0.785219000 | 0.470418000  |
| O  | -2.856918000 | -2.346093000 | -2.243330000 |
| O  | -4.263821000 | 1.348783000  | -0.467803000 |
| N  | -1.553206000 | -0.530441000 | -1.632109000 |
| N  | 0.654125000  | -2.483944000 | -1.573295000 |
| N  | 1.967379000  | -2.123499000 | 0.058461000  |
| N  | 2.709465000  | -2.820092000 | -0.861207000 |

|   |              |              |              |
|---|--------------|--------------|--------------|
| C | 0.698786000  | -1.874198000 | -0.343766000 |
| C | 1.885129000  | -3.027287000 | -1.842424000 |
| H | 2.125413000  | -3.565466000 | -2.748052000 |
| C | 2.624157000  | -1.707085000 | 1.311840000  |
| H | 1.864855000  | -1.766107000 | 2.088753000  |
| H | 2.919647000  | -0.660727000 | 1.203441000  |
| C | 3.826353000  | -2.576857000 | 1.662634000  |
| H | 4.224174000  | -2.239983000 | 2.625354000  |
| H | 4.615263000  | -2.489000000 | 0.913864000  |
| H | 3.549120000  | -3.631510000 | 1.752857000  |
| C | -0.519371000 | -2.682729000 | -2.412453000 |
| H | -0.820428000 | -3.733109000 | -2.391090000 |
| H | -0.253651000 | -2.425796000 | -3.445910000 |
| C | -1.758094000 | -1.865988000 | -2.055410000 |
| C | -2.657145000 | 0.427152000  | -2.035079000 |
| H | -2.784450000 | 0.295416000  | -3.115311000 |
| H | -2.242317000 | 1.420162000  | -1.863920000 |
| C | -3.993040000 | 0.353211000  | -1.380533000 |
| C | -5.115746000 | -0.404703000 | -1.566263000 |
| H | -5.200697000 | -1.253156000 | -2.228119000 |
| C | -6.128867000 | 0.135401000  | -0.712247000 |
| H | -7.146497000 | -0.212462000 | -0.602885000 |
| C | -5.559591000 | 1.195921000  | -0.073168000 |
| H | -5.923126000 | 1.921420000  | 0.638845000  |
| C | -2.330613000 | -2.240801000 | 1.609349000  |
| C | -2.975534000 | -0.994954000 | 1.374502000  |
| H | -3.895470000 | -0.987500000 | 0.800885000  |
| C | -2.462196000 | 0.231650000  | 1.861382000  |
| H | -2.999512000 | 1.148250000  | 1.652775000  |
| C | -1.249936000 | 0.271360000  | 2.596416000  |
| C | -0.545277000 | -0.950268000 | 2.760098000  |
| H | 0.388987000  | -0.959352000 | 3.305523000  |
| C | -1.073691000 | -2.176370000 | 2.263192000  |
| H | -0.504128000 | -3.089950000 | 2.407916000  |
| C | -2.950380000 | -3.541107000 | 1.170942000  |
| H | -3.723577000 | -3.852664000 | 1.884631000  |
| H | -2.205362000 | -4.340844000 | 1.120389000  |
| H | -3.423664000 | -3.443491000 | 0.189005000  |
| C | -0.796418000 | 1.574673000  | 3.229814000  |
| H | -1.047839000 | 2.372040000  | 2.520051000  |
| C | 0.706600000  | 1.648501000  | 3.531144000  |
| H | 1.311734000  | 1.408961000  | 2.650136000  |
| H | 0.993720000  | 0.966238000  | 4.339984000  |
| H | 0.968481000  | 2.659058000  | 3.860802000  |
| C | -1.621830000 | 1.815710000  | 4.515849000  |
| H | -2.697151000 | 1.831591000  | 4.310859000  |

|   |              |              |              |
|---|--------------|--------------|--------------|
| H | -1.347238000 | 2.778635000  | 4.959059000  |
| H | -1.428718000 | 1.034215000  | 5.259818000  |
| C | 0.978461000  | 1.342819000  | -1.250624000 |
| O | 0.794945000  | 0.626915000  | -2.282228000 |
| C | 0.192342000  | 2.639045000  | -1.120922000 |
| C | -0.399477000 | 3.155255000  | -2.283584000 |
| C | 0.116345000  | 3.384591000  | 0.064971000  |
| C | -1.067154000 | 4.380395000  | -2.257074000 |
| H | -0.303718000 | 2.594471000  | -3.207537000 |
| C | -0.556259000 | 4.605288000  | 0.093563000  |
| H | 0.579731000  | 3.011580000  | 0.972532000  |
| C | -1.152628000 | 5.106273000  | -1.067499000 |
| H | -1.508793000 | 4.773768000  | -3.168334000 |
| H | -0.607625000 | 5.172903000  | 1.018713000  |
| H | -1.668960000 | 6.061585000  | -1.046103000 |
| H | 0.264397000  | 0.538592000  | -0.146652000 |
| C | 2.316765000  | 1.358255000  | -0.592556000 |
| H | 2.423156000  | 1.963801000  | 0.301701000  |
| H | -0.662644000 | -0.129677000 | -2.028046000 |
| C | 3.374296000  | 0.739173000  | -1.156243000 |
| H | 3.177752000  | 0.178758000  | -2.068580000 |
| C | 4.761196000  | 0.735006000  | -0.691458000 |
| C | 5.693158000  | -0.076290000 | -1.367785000 |
| C | 5.214493000  | 1.499730000  | 0.403380000  |
| C | 7.024812000  | -0.133862000 | -0.961152000 |
| H | 5.361358000  | -0.666215000 | -2.218418000 |
| C | 6.544415000  | 1.444727000  | 0.806807000  |
| H | 4.527128000  | 2.155869000  | 0.929841000  |
| C | 7.454657000  | 0.626353000  | 0.128148000  |
| H | 7.727090000  | -0.765943000 | -1.496820000 |
| H | 6.878258000  | 2.046969000  | 1.647030000  |
| H | 8.493246000  | 0.589327000  | 0.443822000  |

**(1,2-J')**

|    |              |              |              |
|----|--------------|--------------|--------------|
| Ru | -1.243438000 | -0.407513000 | -0.755181000 |
| O  | -4.289590000 | -0.394994000 | 1.412662000  |
| O  | -0.520638000 | -2.105824000 | 2.766451000  |
| N  | -2.145247000 | 0.419976000  | 1.163420000  |
| N  | -3.140675000 | 1.936327000  | -1.093398000 |
| N  | -1.502644000 | 2.213958000  | -2.420126000 |
| N  | -2.293227000 | 3.326623000  | -2.576739000 |
| C  | -1.988499000 | 1.331446000  | -1.529547000 |
| C  | -3.283448000 | 3.133520000  | -1.758862000 |
| H  | -4.112599000 | 3.812233000  | -1.618347000 |
| C  | -0.250999000 | 2.147827000  | -3.189385000 |
| H  | -0.528021000 | 2.134260000  | -4.248646000 |

|   |              |              |              |
|---|--------------|--------------|--------------|
| H | 0.212161000  | 1.201447000  | -2.921408000 |
| C | 0.679465000  | 3.316115000  | -2.878364000 |
| H | 1.575634000  | 3.233955000  | -3.501978000 |
| H | 0.982110000  | 3.287265000  | -1.828574000 |
| H | 0.198775000  | 4.273935000  | -3.094135000 |
| C | -4.102844000 | 1.336857000  | -0.183208000 |
| H | -4.872163000 | 0.791193000  | -0.737139000 |
| H | -4.604453000 | 2.138348000  | 0.371763000  |
| C | -3.531518000 | 0.364392000  | 0.848412000  |
| C | -1.829826000 | -0.064794000 | 2.567473000  |
| H | -2.592138000 | 0.366726000  | 3.222305000  |
| H | -0.870920000 | 0.388676000  | 2.816955000  |
| C | -1.768559000 | -1.529359000 | 2.806166000  |
| C | -2.688269000 | -2.461630000 | 3.197439000  |
| H | -3.746972000 | -2.288724000 | 3.323877000  |
| C | -1.976040000 | -3.686676000 | 3.398507000  |
| H | -2.381637000 | -4.635553000 | 3.720385000  |
| C | -0.668808000 | -3.412862000 | 3.125352000  |
| H | 0.238631000  | -3.996790000 | 3.160287000  |
| C | -2.600415000 | -2.271355000 | -1.334604000 |
| C | -1.669901000 | -2.662018000 | -0.322300000 |
| H | -2.053422000 | -3.058693000 | 0.611798000  |
| C | -0.275224000 | -2.563597000 | -0.503375000 |
| H | 0.388579000  | -2.887367000 | 0.289099000  |
| C | 0.270563000  | -2.029248000 | -1.706147000 |
| C | -0.639031000 | -1.532695000 | -2.670679000 |
| H | -0.269599000 | -1.083503000 | -3.584045000 |
| C | -2.051887000 | -1.655426000 | -2.480951000 |
| H | -2.718258000 | -1.277522000 | -3.250872000 |
| C | -4.075747000 | -2.530752000 | -1.182888000 |
| H | -4.293584000 | -3.584114000 | -1.399798000 |
| H | -4.661848000 | -1.924977000 | -1.881201000 |
| H | -4.419667000 | -2.323272000 | -0.165275000 |
| C | 1.771506000  | -2.054908000 | -1.923674000 |
| H | 2.237125000  | -1.936247000 | -0.939307000 |
| C | 2.310753000  | -0.937643000 | -2.823872000 |
| H | 2.034391000  | 0.043236000  | -2.428214000 |
| H | 1.954969000  | -1.029136000 | -3.857469000 |
| H | 3.403339000  | -0.991098000 | -2.852206000 |
| C | 2.156859000  | -3.450938000 | -2.468877000 |
| H | 1.824889000  | -4.256075000 | -1.804336000 |
| H | 3.245391000  | -3.518477000 | -2.564747000 |
| H | 1.718654000  | -3.624850000 | -3.458635000 |
| C | 1.116021000  | 0.791149000  | 0.800396000  |
| O | 0.296628000  | 0.920043000  | -0.341995000 |
| C | 0.854268000  | 1.925565000  | 1.808731000  |

|   |              |              |              |
|---|--------------|--------------|--------------|
| C | 0.142540000  | 3.075013000  | 1.440015000  |
| C | 1.348008000  | 1.834873000  | 3.119991000  |
| C | -0.083594000 | 4.103207000  | 2.362494000  |
| H | -0.208302000 | 3.166743000  | 0.416690000  |
| C | 1.118845000  | 2.856045000  | 4.041965000  |
| H | 1.924109000  | 0.960743000  | 3.415521000  |
| C | 0.398953000  | 3.994886000  | 3.666595000  |
| H | -0.625640000 | 4.994474000  | 2.056097000  |
| H | 1.505664000  | 2.766459000  | 5.053396000  |
| H | 0.225696000  | 4.792413000  | 4.383353000  |
| C | 2.570992000  | 0.819407000  | 0.381653000  |
| H | 2.847155000  | 1.674195000  | -0.233714000 |
| H | -1.735103000 | 1.353939000  | 1.052258000  |
| C | 3.477587000  | -0.104129000 | 0.741885000  |
| H | 3.138081000  | -0.926495000 | 1.375608000  |
| C | 4.905384000  | -0.158981000 | 0.392396000  |
| C | 5.678114000  | -1.232341000 | 0.870836000  |
| C | 5.542773000  | 0.809262000  | -0.407312000 |
| C | 7.034123000  | -1.340498000 | 0.564603000  |
| H | 5.206293000  | -1.987987000 | 1.495555000  |
| C | 6.895942000  | 0.701704000  | -0.714959000 |
| H | 4.978382000  | 1.656321000  | -0.786618000 |
| C | 7.648954000  | -0.373429000 | -0.231580000 |
| H | 7.609734000  | -2.177721000 | 0.949539000  |
| H | 7.368716000  | 1.461521000  | -1.331301000 |
| H | 8.705327000  | -0.452245000 | -0.471702000 |
| H | 0.940906000  | -0.166564000 | 1.318154000  |

Ketone hydrogenation  
(K')

|    |              |              |              |
|----|--------------|--------------|--------------|
| Ru | 2.044637000  | -0.620931000 | -0.472374000 |
| O  | 0.751406000  | -2.417429000 | 2.441721000  |
| O  | 2.850055000  | 1.523727000  | 2.873920000  |
| N  | 0.555800000  | -0.469625000 | 1.197274000  |
| N  | -0.555203000 | -2.039597000 | -0.912346000 |
| N  | -0.106340000 | -0.977376000 | -2.699930000 |
| N  | -1.311650000 | -1.596020000 | -2.935414000 |
| C  | 0.398421000  | -1.222005000 | -1.473072000 |
| C  | -1.560955000 | -2.230445000 | -1.829016000 |
| H  | -2.436146000 | -2.838318000 | -1.650525000 |
| C  | 0.440133000  | -0.104639000 | -3.744500000 |
| H  | 0.583941000  | -0.716975000 | -4.640310000 |
| H  | 1.413448000  | 0.222982000  | -3.378428000 |
| C  | -0.472149000 | 1.084979000  | -4.036268000 |
| H  | -0.030929000 | 1.693993000  | -4.831860000 |
| H  | -0.594720000 | 1.712199000  | -3.147452000 |



|   |              |              |              |
|---|--------------|--------------|--------------|
| H | -1.457441000 | 0.747082000  | -4.368365000 |
| C | -0.475970000 | -2.632243000 | 0.416110000  |
| H | -0.059414000 | -3.642097000 | 0.365894000  |
| H | -1.492561000 | -2.705026000 | 0.818217000  |
| C | 0.355146000  | -1.855266000 | 1.443347000  |
| C | 0.766158000  | 0.373182000  | 2.429058000  |
| H | 0.019809000  | 0.052049000  | 3.163056000  |
| H | 0.528749000  | 1.392630000  | 2.119151000  |
| C | 2.113211000  | 0.379274000  | 3.061002000  |
| C | 2.771688000  | -0.453871000 | 3.921196000  |
| H | 2.418690000  | -1.417291000 | 4.258171000  |
| C | 3.990151000  | 0.205986000  | 4.280188000  |
| H | 4.756272000  | -0.153672000 | 4.952887000  |
| C | 3.982757000  | 1.400219000  | 3.621458000  |
| H | 4.657093000  | 2.242857000  | 3.595795000  |
| C | 3.518871000  | -2.549540000 | -0.671475000 |
| C | 3.818620000  | -1.899831000 | 0.536526000  |
| H | 3.770134000  | -2.452150000 | 1.470075000  |
| C | 4.201732000  | -0.522400000 | 0.579894000  |
| H | 4.461660000  | -0.087017000 | 1.537923000  |
| C | 4.265930000  | 0.266553000  | -0.581471000 |
| C | 3.839120000  | -0.348948000 | -1.804870000 |
| H | 3.832273000  | 0.220678000  | -2.726230000 |
| C | 3.469335000  | -1.717699000 | -1.837382000 |
| H | 3.167388000  | -2.154428000 | -2.785086000 |
| C | 3.237470000  | -4.027606000 | -0.746750000 |
| H | 2.909901000  | -4.419517000 | 0.220869000  |
| H | 4.144065000  | -4.575004000 | -1.034777000 |
| H | 2.470213000  | -4.254148000 | -1.494467000 |
| C | 4.801261000  | 1.687516000  | -0.518766000 |
| H | 4.598081000  | 2.051025000  | 0.495735000  |
| C | 4.141775000  | 2.659602000  | -1.507779000 |
| H | 3.052444000  | 2.661959000  | -1.398848000 |
| H | 4.386268000  | 2.414373000  | -2.548349000 |
| H | 4.508928000  | 3.674794000  | -1.324987000 |
| C | 6.333931000  | 1.657307000  | -0.716783000 |
| H | 6.824287000  | 1.015899000  | 0.023171000  |
| H | 6.746130000  | 2.667180000  | -0.618117000 |
| H | 6.595085000  | 1.284417000  | -1.714342000 |
| C | -2.909763000 | 1.274150000  | 0.213061000  |
| O | -2.058095000 | 0.387899000  | 0.333786000  |
| C | -2.517770000 | 2.690366000  | -0.033516000 |
| C | -1.167875000 | 2.991864000  | -0.292224000 |
| C | -3.457476000 | 3.736246000  | -0.018092000 |
| C | -0.768618000 | 4.303844000  | -0.527233000 |
| H | -0.440829000 | 2.186649000  | -0.320662000 |

|   |              |              |              |
|---|--------------|--------------|--------------|
| C | -3.054322000 | 5.050795000  | -0.247043000 |
| H | -4.504725000 | 3.533146000  | 0.178862000  |
| C | -1.711456000 | 5.336803000  | -0.502530000 |
| H | 0.275446000  | 4.524455000  | -0.730509000 |
| H | -3.787901000 | 5.851031000  | -0.226870000 |
| H | -1.400077000 | 6.361561000  | -0.683764000 |
| H | 1.440627000  | 0.818005000  | -0.824484000 |
| C | -4.384856000 | 0.919769000  | 0.312413000  |
| H | -4.905486000 | 1.314791000  | -0.569956000 |
| H | -0.258872000 | -0.074286000 | 0.707648000  |
| C | -4.662195000 | -0.585037000 | 0.462100000  |
| H | -4.139770000 | -0.956218000 | 1.351140000  |
| C | -6.144013000 | -0.883973000 | 0.561674000  |
| C | -6.913626000 | -1.080570000 | -0.593119000 |
| C | -6.780950000 | -0.939648000 | 1.808469000  |
| C | -8.285234000 | -1.323490000 | -0.505884000 |
| H | -6.434383000 | -1.049279000 | -1.570066000 |
| C | -8.152616000 | -1.181958000 | 1.900507000  |
| H | -6.197380000 | -0.798875000 | 2.716290000  |
| C | -8.908803000 | -1.373845000 | 0.742589000  |
| H | -8.865243000 | -1.478455000 | -1.411548000 |
| H | -8.628931000 | -1.226595000 | 2.876055000  |
| H | -9.975537000 | -1.566514000 | 0.812626000  |
| H | -4.229010000 | -1.108823000 | -0.398757000 |
| H | -4.813183000 | 1.463975000  | 1.166199000  |

### TS<sup>K'L'</sup>

|    |              |              |              |
|----|--------------|--------------|--------------|
| Ru | -0.989817000 | -0.731634000 | 0.444080000  |
| O  | -3.169980000 | -2.030950000 | -2.293081000 |
| O  | -4.121744000 | 1.831707000  | -0.491543000 |
| N  | -1.669303000 | -0.383844000 | -1.649013000 |
| N  | 0.169139000  | -2.786917000 | -1.504898000 |
| N  | 1.416414000  | -2.708744000 | 0.213526000  |
| N  | 1.964620000  | -3.675216000 | -0.590601000 |
| C  | 0.300791000  | -2.137072000 | -0.304584000 |
| C  | 1.190535000  | -3.695529000 | -1.632451000 |
| H  | 1.323225000  | -4.341014000 | -2.488815000 |
| C  | 2.064455000  | -2.439760000 | 1.509536000  |
| H  | 1.598649000  | -3.087266000 | 2.262311000  |
| H  | 1.827112000  | -1.404443000 | 1.754519000  |
| C  | 3.572867000  | -2.666203000 | 1.478901000  |
| H  | 3.977449000  | -2.422900000 | 2.466700000  |
| H  | 4.063548000  | -2.024229000 | 0.741709000  |
| H  | 3.815736000  | -3.705852000 | 1.251847000  |
| C  | -0.863755000 | -2.586768000 | -2.515277000 |
| H  | -1.299901000 | -3.551832000 | -2.779712000 |

|   |              |              |              |
|---|--------------|--------------|--------------|
| H | -0.398771000 | -2.149549000 | -3.408271000 |
| C | -2.024421000 | -1.677946000 | -2.107745000 |
| C | -2.639621000 | 0.710747000  | -2.048555000 |
| H | -2.777442000 | 0.603748000  | -3.130348000 |
| H | -2.100773000 | 1.641620000  | -1.869917000 |
| C | -3.975560000 | 0.806015000  | -1.399246000 |
| C | -5.180883000 | 0.185943000  | -1.577491000 |
| H | -5.369262000 | -0.648942000 | -2.235278000 |
| C | -6.119095000 | 0.847989000  | -0.723436000 |
| H | -7.170718000 | 0.625169000  | -0.609485000 |
| C | -5.425225000 | 1.836739000  | -0.092152000 |
| H | -5.697502000 | 2.605568000  | 0.615125000  |
| C | -2.704819000 | -1.901176000 | 1.602008000  |
| C | -3.137986000 | -0.565478000 | 1.375629000  |
| H | -4.056859000 | -0.407630000 | 0.823049000  |
| C | -2.417205000 | 0.557115000  | 1.845378000  |
| H | -2.794084000 | 1.550919000  | 1.636926000  |
| C | -1.209326000 | 0.394235000  | 2.573227000  |
| C | -0.721583000 | -0.928525000 | 2.740246000  |
| H | 0.200693000  | -1.098746000 | 3.278771000  |
| C | -1.452121000 | -2.047764000 | 2.249171000  |
| H | -1.046178000 | -3.044636000 | 2.393340000  |
| C | -3.536998000 | -3.079603000 | 1.170175000  |
| H | -4.343539000 | -3.258727000 | 1.892397000  |
| H | -2.936385000 | -3.992160000 | 1.111192000  |
| H | -3.997271000 | -2.902977000 | 0.193150000  |
| C | -0.543484000 | 1.605731000  | 3.202779000  |
| H | -0.607111000 | 2.418709000  | 2.469148000  |
| C | 0.930399000  | 1.403022000  | 3.577997000  |
| H | 1.526202000  | 1.044714000  | 2.731404000  |
| H | 1.045829000  | 0.692240000  | 4.404778000  |
| H | 1.360541000  | 2.352216000  | 3.912659000  |
| C | -1.363297000 | 2.030129000  | 4.444908000  |
| H | -2.405854000 | 2.246234000  | 4.190313000  |
| H | -0.928823000 | 2.933306000  | 4.885914000  |
| H | -1.355157000 | 1.243942000  | 5.208636000  |
| C | 1.102570000  | 0.962373000  | -1.199591000 |
| O | 0.804929000  | 0.349071000  | -2.276929000 |
| C | 0.644832000  | 2.407547000  | -1.058461000 |
| C | 0.093133000  | 3.041557000  | -2.182043000 |
| C | 0.829723000  | 3.154784000  | 0.114964000  |
| C | -0.287553000 | 4.382857000  | -2.127307000 |
| H | -0.000198000 | 2.474489000  | -3.102428000 |
| C | 0.448981000  | 4.495418000  | 0.171183000  |
| H | 1.278883000  | 2.693109000  | 0.988195000  |
| C | -0.116974000 | 5.111935000  | -0.948438000 |

|   |              |              |              |
|---|--------------|--------------|--------------|
| H | -0.702194000 | 4.863137000  | -3.009154000 |
| H | 0.603110000  | 5.063767000  | 1.084407000  |
| H | -0.407776000 | 6.157575000  | -0.905848000 |
| H | 0.269721000  | 0.344306000  | -0.181559000 |
| C | 2.462290000  | 0.622591000  | -0.570410000 |
| H | 2.530412000  | 0.966487000  | 0.466560000  |
| H | -0.732611000 | -0.095764000 | -2.047863000 |
| C | 3.616316000  | 1.245121000  | -1.399241000 |
| H | 3.513758000  | 2.336107000  | -1.401441000 |
| C | 4.969359000  | 0.849493000  | -0.848963000 |
| C | 5.592030000  | -0.336564000 | -1.265395000 |
| C | 5.615424000  | 1.641522000  | 0.110450000  |
| C | 6.825281000  | -0.722426000 | -0.736208000 |
| H | 5.113553000  | -0.953620000 | -2.023570000 |
| C | 6.848678000  | 1.259804000  | 0.641651000  |
| H | 5.154689000  | 2.572985000  | 0.433583000  |
| C | 7.456510000  | 0.075038000  | 0.221160000  |
| H | 7.298190000  | -1.638436000 | -1.080003000 |
| H | 7.339335000  | 1.892279000  | 1.376574000  |
| H | 8.419626000  | -0.219359000 | 0.628390000  |
| H | 3.510810000  | 0.908102000  | -2.436328000 |
| H | 2.571965000  | -0.463682000 | -0.576014000 |

(L')

|    |              |              |              |
|----|--------------|--------------|--------------|
| Ru | -1.257884000 | 0.725450000  | -0.517980000 |
| O  | -4.398882000 | 0.201374000  | 1.703325000  |
| O  | -2.058960000 | -3.244129000 | 0.046020000  |
| N  | -2.126720000 | -0.059483000 | 1.458035000  |
| N  | -1.911165000 | 2.836631000  | 1.565433000  |
| N  | -0.107286000 | 3.383889000  | 0.577777000  |
| N  | -0.308783000 | 4.350601000  | 1.531144000  |
| C  | -1.070558000 | 2.447143000  | 0.554620000  |
| C  | -1.410427000 | 3.993985000  | 2.119391000  |
| H  | -1.879009000 | 4.529851000  | 2.932544000  |
| C  | 1.116362000  | 3.444674000  | -0.239531000 |
| H  | 0.973079000  | 4.224185000  | -0.996556000 |
| H  | 1.188975000  | 2.473124000  | -0.726088000 |
| C  | 2.355803000  | 3.728117000  | 0.603202000  |
| H  | 3.234187000  | 3.734067000  | -0.049561000 |
| H  | 2.493771000  | 2.948833000  | 1.357698000  |
| H  | 2.285547000  | 4.697618000  | 1.101267000  |
| C  | -3.177738000 | 2.208739000  | 1.916929000  |
| H  | -3.999779000 | 2.674879000  | 1.366222000  |
| H  | -3.361954000 | 2.380087000  | 2.983197000  |
| C  | -3.294332000 | 0.700367000  | 1.681533000  |
| C  | -2.266884000 | -1.533381000 | 1.747779000  |

|   |              |              |              |
|---|--------------|--------------|--------------|
| H | -2.825954000 | -1.617441000 | 2.684824000  |
| H | -1.250594000 | -1.891419000 | 1.914220000  |
| C | -2.906750000 | -2.387440000 | 0.708834000  |
| C | -4.195057000 | -2.631842000 | 0.321694000  |
| H | -5.071645000 | -2.123194000 | 0.694738000  |
| C | -4.142923000 | -3.690859000 | -0.640196000 |
| H | -4.976166000 | -4.152485000 | -1.151487000 |
| C | -2.826923000 | -4.026937000 | -0.763406000 |
| H | -2.298133000 | -4.777299000 | -1.331677000 |
| C | -2.667032000 | 1.630191000  | -2.125741000 |
| C | -3.060574000 | 0.302079000  | -1.856527000 |
| H | -4.062968000 | 0.101410000  | -1.492618000 |
| C | -2.198041000 | -0.808433000 | -2.139818000 |
| H | -2.588426000 | -1.810163000 | -2.002305000 |
| C | -0.881092000 | -0.625208000 | -2.573306000 |
| C | -0.403148000 | 0.733230000  | -2.617849000 |
| H | 0.633001000  | 0.933878000  | -2.860105000 |
| C | -1.290920000 | 1.826175000  | -2.465366000 |
| H | -0.911810000 | 2.836300000  | -2.584522000 |
| C | -3.626047000 | 2.787041000  | -2.027939000 |
| H | -4.032513000 | 3.017294000  | -3.020768000 |
| H | -3.135486000 | 3.692888000  | -1.657896000 |
| H | -4.472520000 | 2.551749000  | -1.375724000 |
| C | -0.032161000 | -1.826324000 | -2.977003000 |
| H | -0.056682000 | -2.530676000 | -2.134795000 |
| C | 1.432086000  | -1.489701000 | -3.287379000 |
| H | 1.935667000  | -0.998639000 | -2.450238000 |
| H | 1.516977000  | -0.844545000 | -4.170391000 |
| H | 1.979759000  | -2.411361000 | -3.507271000 |
| C | -0.680866000 | -2.527771000 | -4.193367000 |
| H | -1.704281000 | -2.853889000 | -3.983185000 |
| H | -0.095487000 | -3.411670000 | -4.467411000 |
| H | -0.708145000 | -1.860246000 | -5.062369000 |
| C | 1.282711000  | -0.724521000 | 0.568040000  |
| O | 0.388874000  | 0.370722000  | 0.688273000  |
| C | 1.321422000  | -1.497152000 | 1.884327000  |
| C | 1.434217000  | -0.807615000 | 3.102462000  |
| C | 1.261108000  | -2.896823000 | 1.911323000  |
| C | 1.482826000  | -1.500069000 | 4.312696000  |
| H | 1.485486000  | 0.277810000  | 3.093882000  |
| C | 1.312031000  | -3.593712000 | 3.122547000  |
| H | 1.170380000  | -3.447845000 | 0.977829000  |
| C | 1.421748000  | -2.896864000 | 4.326515000  |
| H | 1.575230000  | -0.951632000 | 5.246568000  |
| H | 1.264679000  | -4.679250000 | 3.123184000  |
| H | 1.462085000  | -3.436232000 | 5.268560000  |

|   |              |              |              |
|---|--------------|--------------|--------------|
| C | 2.680051000  | -0.182509000 | 0.190071000  |
| H | 2.986274000  | 0.527449000  | 0.968495000  |
| H | -1.258154000 | 0.282164000  | 1.891299000  |
| C | 3.785940000  | -1.241846000 | 0.008362000  |
| H | 3.890470000  | -1.814678000 | 0.936881000  |
| H | 3.485053000  | -1.959039000 | -0.767290000 |
| C | 5.115740000  | -0.617214000 | -0.362789000 |
| C | 5.495780000  | -0.466815000 | -1.703236000 |
| C | 5.981790000  | -0.140554000 | 0.631639000  |
| C | 6.704078000  | 0.144548000  | -2.043777000 |
| H | 4.844668000  | -0.844755000 | -2.489602000 |
| C | 7.190426000  | 0.471640000  | 0.297015000  |
| H | 5.709696000  | -0.259209000 | 1.678575000  |
| C | 7.555110000  | 0.617559000  | -1.043317000 |
| H | 6.984595000  | 0.243206000  | -3.089180000 |
| H | 7.851427000  | 0.827252000  | 1.082945000  |
| H | 8.498660000  | 1.088100000  | -1.305191000 |
| H | 0.950659000  | -1.422750000 | -0.217453000 |
| H | 2.579156000  | 0.399887000  | -0.736362000 |

**TS<sup>L'1b'</sup>**

|    |              |              |              |
|----|--------------|--------------|--------------|
| Ru | 1.156925000  | -0.777034000 | -0.547523000 |
| O  | 3.845772000  | -0.075645000 | 2.638710000  |
| O  | 2.889966000  | 3.113542000  | -0.373329000 |
| N  | 1.973475000  | 0.110152000  | 1.300653000  |
| N  | 1.683718000  | -2.796536000 | 1.629946000  |
| N  | -0.104851000 | -3.358829000 | 0.624110000  |
| N  | 0.058347000  | -4.285736000 | 1.622786000  |
| C  | 0.877190000  | -2.437537000 | 0.588442000  |
| C  | 1.152186000  | -3.917850000 | 2.221318000  |
| H  | 1.592729000  | -4.421866000 | 3.069547000  |
| C  | -1.314120000 | -3.449324000 | -0.209527000 |
| H  | -1.188088000 | -4.300196000 | -0.888404000 |
| H  | -1.343896000 | -2.530812000 | -0.795035000 |
| C  | -2.579423000 | -3.610251000 | 0.628461000  |
| H  | -3.446450000 | -3.645693000 | -0.038468000 |
| H  | -2.703256000 | -2.763961000 | 1.310004000  |
| H  | -2.550938000 | -4.532729000 | 1.212420000  |
| C  | 2.921718000  | -2.130454000 | 2.014409000  |
| H  | 3.730152000  | -2.449712000 | 1.346087000  |
| H  | 3.186170000  | -2.455159000 | 3.022273000  |
| C  | 2.929897000  | -0.597465000 | 2.025203000  |
| C  | 2.201308000  | 1.590496000  | 1.376635000  |
| H  | 2.383711000  | 1.827783000  | 2.429594000  |
| H  | 1.266312000  | 2.072964000  | 1.089379000  |
| C  | 3.294373000  | 2.159253000  | 0.532683000  |

|   |              |              |              |
|---|--------------|--------------|--------------|
| C | 4.651689000  | 2.015477000  | 0.464580000  |
| H | 5.247625000  | 1.364925000  | 1.086957000  |
| C | 5.113160000  | 2.920021000  | -0.546881000 |
| H | 6.134830000  | 3.082897000  | -0.860946000 |
| C | 4.009025000  | 3.565358000  | -1.015617000 |
| H | 3.851312000  | 4.350182000  | -1.739761000 |
| C | 2.224595000  | -1.976307000 | -2.209307000 |
| C | 2.954455000  | -0.795418000 | -1.944011000 |
| H | 3.989693000  | -0.861880000 | -1.626140000 |
| C | 2.385794000  | 0.496761000  | -2.179359000 |
| H | 3.011868000  | 1.369510000  | -2.036981000 |
| C | 1.049079000  | 0.655812000  | -2.567130000 |
| C | 0.259455000  | -0.544008000 | -2.657116000 |
| H | -0.798930000 | -0.473407000 | -2.879387000 |
| C | 0.843580000  | -1.823246000 | -2.554722000 |
| H | 0.233528000  | -2.705125000 | -2.717914000 |
| C | 2.863881000  | -3.343499000 | -2.120963000 |
| H | 2.322614000  | -4.064194000 | -2.740869000 |
| H | 2.870830000  | -3.729121000 | -1.096345000 |
| H | 3.899374000  | -3.308546000 | -2.471875000 |
| C | 0.515110000  | 2.040155000  | -2.919487000 |
| H | 0.831864000  | 2.717075000  | -2.116334000 |
| C | -1.011448000 | 2.116075000  | -3.050224000 |
| H | -1.525535000 | 1.762678000  | -2.151489000 |
| H | -1.373835000 | 1.533822000  | -3.906238000 |
| H | -1.313220000 | 3.154658000  | -3.217144000 |
| C | 1.184692000  | 2.523808000  | -4.227290000 |
| H | 2.275790000  | 2.550089000  | -4.141366000 |
| H | 0.841282000  | 3.534932000  | -4.469678000 |
| H | 0.925568000  | 1.869652000  | -5.068002000 |
| C | -1.298613000 | 0.919603000  | 0.772913000  |
| O | -0.375850000 | -0.187140000 | 0.859312000  |
| C | -1.438700000 | 1.562870000  | 2.142028000  |
| C | -1.712739000 | 0.780846000  | 3.274853000  |
| C | -1.315712000 | 2.949877000  | 2.292923000  |
| C | -1.858405000 | 1.375633000  | 4.527728000  |
| H | -1.806511000 | -0.297016000 | 3.173307000  |
| C | -1.467913000 | 3.547974000  | 3.546373000  |
| H | -1.106500000 | 3.570161000  | 1.423660000  |
| C | -1.738054000 | 2.761437000  | 4.666630000  |
| H | -2.069773000 | 0.759014000  | 5.397036000  |
| H | -1.373020000 | 4.625567000  | 3.645539000  |
| H | -1.854466000 | 3.223556000  | 5.642649000  |
| C | -2.629239000 | 0.381448000  | 0.222022000  |
| H | -2.996840000 | -0.394208000 | 0.904358000  |
| H | 0.700020000  | 0.001494000  | 1.459365000  |

|   |              |              |              |
|---|--------------|--------------|--------------|
| C | -3.725260000 | 1.448961000  | 0.027456000  |
| H | -3.945768000 | 1.915052000  | 0.994527000  |
| H | -3.349011000 | 2.248677000  | -0.624462000 |
| C | -4.989280000 | 0.860504000  | -0.565913000 |
| C | -5.223790000 | 0.898076000  | -1.946884000 |
| C | -5.937745000 | 0.233392000  | 0.254584000  |
| C | -6.371202000 | 0.322590000  | -2.496522000 |
| H | -4.507901000 | 1.396908000  | -2.597933000 |
| C | -7.085622000 | -0.344089000 | -0.289740000 |
| H | -5.780681000 | 0.207886000  | 1.331099000  |
| C | -7.305252000 | -0.302558000 | -1.668528000 |
| H | -6.540209000 | 0.371297000  | -3.569000000 |
| H | -7.813598000 | -0.817680000 | 0.363450000  |
| H | -8.202173000 | -0.745072000 | -2.092635000 |
| H | -2.432068000 | -0.113567000 | -0.738843000 |
| H | -0.903246000 | 1.672700000  | 0.074888000  |

*Deprotonated alcohol pathway or neutral Pathway*

Dehydrogenation of alcohols

(E)

|    |              |              |              |
|----|--------------|--------------|--------------|
| Ru | -0.438175000 | 0.467512000  | -0.603191000 |
| O  | -1.679398000 | 1.756406000  | 3.294406000  |
| O  | -3.294881000 | -2.080422000 | 1.432884000  |
| N  | -1.017312000 | 0.585886000  | 1.420726000  |
| N  | 0.482413000  | 2.972176000  | 0.749200000  |
| N  | 2.024109000  | 2.319205000  | -0.568065000 |
| N  | 2.503440000  | 3.472325000  | 0.008731000  |
| C  | 0.784658000  | 1.984734000  | -0.146342000 |
| C  | 1.542320000  | 3.838927000  | 0.808661000  |
| H  | 1.570404000  | 4.712545000  | 1.443625000  |
| C  | 2.872296000  | 1.568148000  | -1.503832000 |
| H  | 2.820742000  | 2.060256000  | -2.483236000 |
| H  | 2.419300000  | 0.577524000  | -1.567711000 |
| C  | 4.319648000  | 1.473294000  | -1.027605000 |
| H  | 4.897402000  | 0.906782000  | -1.765426000 |
| H  | 4.383041000  | 0.943834000  | -0.072885000 |
| H  | 4.768411000  | 2.463521000  | -0.916942000 |
| C  | -0.759403000 | 3.030621000  | 1.520611000  |
| H  | -1.562751000 | 3.401782000  | 0.872897000  |
| H  | -0.619649000 | 3.741701000  | 2.335454000  |
| C  | -1.183343000 | 1.691058000  | 2.156543000  |
| C  | -1.408752000 | -0.662882000 | 2.094540000  |
| H  | -1.058310000 | -0.617682000 | 3.133141000  |



|   |              |              |              |
|---|--------------|--------------|--------------|
| H | -0.898419000 | -1.487885000 | 1.592966000  |
| C | -2.882776000 | -0.947040000 | 2.099413000  |
| C | -3.968744000 | -0.325669000 | 2.646964000  |
| H | -3.926611000 | 0.579446000  | 3.234216000  |
| C | -5.116951000 | -1.110608000 | 2.297707000  |
| H | -6.147165000 | -0.921660000 | 2.567934000  |
| C | -4.653390000 | -2.161564000 | 1.567117000  |
| H | -5.119873000 | -3.019785000 | 1.107391000  |
| C | -1.500460000 | 1.639741000  | -2.272356000 |
| C | -2.491444000 | 1.008778000  | -1.487004000 |
| H | -3.244192000 | 1.606730000  | -0.984145000 |
| C | -2.536568000 | -0.417716000 | -1.364187000 |
| H | -3.312821000 | -0.864417000 | -0.752966000 |
| C | -1.563768000 | -1.237701000 | -1.946453000 |
| C | -0.506228000 | -0.582065000 | -2.674986000 |
| H | 0.310147000  | -1.174255000 | -3.072395000 |
| C | -0.504263000 | 0.803995000  | -2.887472000 |
| H | 0.288907000  | 1.259632000  | -3.472051000 |
| C | -1.512861000 | 3.126537000  | -2.519347000 |
| H | -1.989779000 | 3.347480000  | -3.483340000 |
| H | -0.498973000 | 3.538417000  | -2.551729000 |
| H | -2.075305000 | 3.654703000  | -1.743497000 |
| C | -1.638478000 | -2.750536000 | -1.807372000 |
| H | -2.196008000 | -2.947016000 | -0.883754000 |
| C | -0.261798000 | -3.422436000 | -1.674655000 |
| H | 0.345947000  | -2.924665000 | -0.912902000 |
| H | 0.289947000  | -3.403432000 | -2.623696000 |
| H | -0.390057000 | -4.475558000 | -1.400356000 |
| C | -2.441802000 | -3.348405000 | -2.981899000 |
| H | -3.450842000 | -2.924305000 | -3.039689000 |
| H | -2.534819000 | -4.434441000 | -2.864349000 |
| H | -1.940462000 | -3.157393000 | -3.939143000 |
| C | 1.801728000  | -0.706029000 | 1.151086000  |
| O | 1.093910000  | -0.807578000 | -0.042188000 |
| C | 3.111999000  | -1.488507000 | 1.100463000  |
| C | 3.486246000  | -2.226418000 | -0.026713000 |
| C | 3.972074000  | -1.475213000 | 2.208935000  |
| C | 4.690430000  | -2.936878000 | -0.047176000 |
| H | 2.818311000  | -2.235717000 | -0.881099000 |
| C | 5.174761000  | -2.180714000 | 2.191198000  |
| H | 3.693132000  | -0.907243000 | 3.095451000  |
| C | 5.539530000  | -2.916889000 | 1.059543000  |
| H | 4.964109000  | -3.508882000 | -0.931085000 |
| H | 5.828360000  | -2.157595000 | 3.060029000  |
| H | 6.475838000  | -3.469052000 | 1.044314000  |
| H | 2.051993000  | 0.340092000  | 1.409591000  |

|     |              |              |              |
|-----|--------------|--------------|--------------|
| H   | 1.226205000  | -1.079761000 | 2.018515000  |
| (A) |              |              |              |
| Ru  | -0.600928000 | -0.539998000 | -0.407119000 |
| O   | 1.215067000  | -1.850799000 | 3.263445000  |
| O   | 3.617565000  | -1.240870000 | -0.511338000 |
| N   | 0.653636000  | -0.825856000 | 1.275120000  |
| N   | -2.119235000 | -1.282120000 | 2.086914000  |
| N   | -3.338358000 | -0.021046000 | 0.882157000  |
| N   | -4.100526000 | -0.308921000 | 1.988842000  |
| C   | -2.120200000 | -0.606915000 | 0.901299000  |
| C   | -3.325700000 | -1.074675000 | 2.704140000  |
| H   | -3.589919000 | -1.491834000 | 3.664916000  |
| C   | -3.868986000 | 0.838478000  | -0.187088000 |
| H   | -4.245646000 | 0.191801000  | -0.989776000 |
| H   | -3.006095000 | 1.396503000  | -0.557159000 |
| C   | -4.976720000 | 1.766781000  | 0.298073000  |
| H   | -5.302442000 | 2.388659000  | -0.542615000 |
| H   | -4.622256000 | 2.427055000  | 1.094758000  |
| H   | -5.837709000 | 1.209193000  | 0.674163000  |
| C   | -1.017991000 | -2.113779000 | 2.567628000  |
| H   | -1.070962000 | -3.089054000 | 2.068877000  |
| H   | -1.154745000 | -2.271851000 | 3.638041000  |
| C   | 0.398049000  | -1.541093000 | 2.378148000  |
| C   | 2.060543000  | -0.383722000 | 1.174660000  |
| H   | 2.379341000  | -0.023728000 | 2.158767000  |
| H   | 2.108666000  | 0.453898000  | 0.479141000  |
| C   | 3.021047000  | -1.442105000 | 0.715072000  |
| C   | 3.466426000  | -2.621721000 | 1.242127000  |
| H   | 3.165307000  | -3.018221000 | 2.200026000  |
| C   | 4.381305000  | -3.184456000 | 0.291497000  |
| H   | 4.931589000  | -4.111526000 | 0.380161000  |
| C   | 4.437975000  | -2.307312000 | -0.748257000 |
| H   | 4.991703000  | -2.277122000 | -1.674583000 |
| C   | -0.677299000 | -2.625632000 | -1.468191000 |
| C   | 0.632168000  | -2.098562000 | -1.575253000 |
| H   | 1.459043000  | -2.654935000 | -1.146821000 |
| C   | 0.907336000  | -0.870914000 | -2.246645000 |
| H   | 1.931354000  | -0.521526000 | -2.299247000 |
| C   | -0.144635000 | -0.083770000 | -2.760419000 |
| C   | -1.480701000 | -0.543158000 | -2.582750000 |
| H   | -2.314078000 | 0.051006000  | -2.934594000 |
| C   | -1.730162000 | -1.775020000 | -1.919789000 |
| H   | -2.759074000 | -2.098084000 | -1.783338000 |
| C   | -0.943654000 | -3.996206000 | -0.900963000 |
| H   | -0.943102000 | -4.752573000 | -1.697430000 |

|   |              |              |              |
|---|--------------|--------------|--------------|
| H | -1.919724000 | -4.043520000 | -0.405822000 |
| H | -0.173345000 | -4.280800000 | -0.177377000 |
| C | 0.171662000  | 1.212767000  | -3.487705000 |
| H | 1.101822000  | 1.594931000  | -3.048625000 |
| C | -0.901663000 | 2.299097000  | -3.321980000 |
| H | -1.113693000 | 2.463813000  | -2.261607000 |
| H | -1.832478000 | 2.033629000  | -3.839348000 |
| H | -0.547380000 | 3.237548000  | -3.763510000 |
| C | 0.442702000  | 0.910907000  | -4.977479000 |
| H | 1.249198000  | 0.179975000  | -5.102584000 |
| H | 0.730474000  | 1.829246000  | -5.502094000 |
| H | -0.454555000 | 0.511475000  | -5.466003000 |
| C | -0.342545000 | 2.173669000  | 1.100292000  |
| O | -0.674228000 | 1.516313000  | -0.093544000 |
| C | 1.034373000  | 2.845758000  | 1.053642000  |
| C | 1.580527000  | 3.290255000  | -0.156021000 |
| C | 1.755050000  | 3.075849000  | 2.233529000  |
| C | 2.814833000  | 3.943558000  | -0.187913000 |
| H | 1.027148000  | 3.109828000  | -1.071764000 |
| C | 2.989358000  | 3.727311000  | 2.207850000  |
| H | 1.348665000  | 2.730726000  | 3.182850000  |
| C | 3.525300000  | 4.163990000  | 0.993944000  |
| H | 3.224268000  | 4.280261000  | -1.137878000 |
| H | 3.536454000  | 3.886680000  | 3.134002000  |
| H | 4.488536000  | 4.667272000  | 0.969748000  |
| H | -0.332056000 | 1.473261000  | 1.949265000  |
| C | -1.408801000 | 3.251403000  | 1.396282000  |
| H | -2.388067000 | 2.785872000  | 1.550814000  |
| H | -1.157100000 | 3.830327000  | 2.292936000  |
| H | -1.481770000 | 3.945474000  | 0.550853000  |

(TS<sup>EF</sup>)

|    |              |              |              |
|----|--------------|--------------|--------------|
| Ru | 0.307269000  | -0.533382000 | 0.523771000  |
| O  | 0.695254000  | 3.701330000  | 1.124839000  |
| O  | 3.690540000  | 1.387820000  | -1.431876000 |
| N  | 0.623255000  | 1.552759000  | 0.286111000  |
| N  | -1.566781000 | 1.142080000  | 2.137585000  |
| N  | -2.646031000 | -0.567094000 | 1.466404000  |
| N  | -3.540555000 | 0.155536000  | 2.219480000  |
| C  | -1.419000000 | 0.000170000  | 1.397438000  |
| C  | -2.853370000 | 1.192011000  | 2.606123000  |
| H  | -3.242334000 | 1.996107000  | 3.213697000  |
| C  | -3.066407000 | -1.841867000 | 0.862169000  |
| H  | -2.777634000 | -2.652197000 | 1.543296000  |
| H  | -2.499267000 | -1.955072000 | -0.064805000 |
| C  | -4.567222000 | -1.895120000 | 0.596366000  |

|   |              |              |              |
|---|--------------|--------------|--------------|
| H | -4.799442000 | -2.850387000 | 0.113552000  |
| H | -4.873723000 | -1.086542000 | -0.071971000 |
| H | -5.143962000 | -1.820218000 | 1.521144000  |
| C | -0.495448000 | 2.101557000  | 2.403011000  |
| H | 0.175031000  | 1.680173000  | 3.162798000  |
| H | -0.944623000 | 3.009382000  | 2.807322000  |
| C | 0.331245000  | 2.512957000  | 1.172303000  |
| C | 1.395723000  | 2.032640000  | -0.871131000 |
| H | 1.002718000  | 3.014788000  | -1.164149000 |
| H | 1.243998000  | 1.339423000  | -1.702952000 |
| C | 2.873375000  | 2.164305000  | -0.641514000 |
| C | 3.639876000  | 2.910963000  | 0.206785000  |
| H | 3.250585000  | 3.617810000  | 0.924323000  |
| C | 5.007175000  | 2.575222000  | -0.066661000 |
| H | 5.889448000  | 2.978983000  | 0.411449000  |
| C | 4.982031000  | 1.653074000  | -1.068089000 |
| H | 5.743310000  | 1.125412000  | -1.622470000 |
| C | 1.091501000  | -1.901846000 | 2.304641000  |
| C | 2.161863000  | -1.083685000 | 1.896712000  |
| H | 2.658512000  | -0.438430000 | 2.614126000  |
| C | 2.615320000  | -1.096757000 | 0.540281000  |
| H | 3.441898000  | -0.451051000 | 0.266804000  |
| C | 2.031844000  | -1.921349000 | -0.439732000 |
| C | 0.863113000  | -2.657851000 | -0.044636000 |
| H | 0.300987000  | -3.213268000 | -0.786049000 |
| C | 0.431121000  | -2.682105000 | 1.299848000  |
| H | -0.421024000 | -3.294240000 | 1.574974000  |
| C | 0.629797000  | -1.942364000 | 3.744420000  |
| H | 1.484937000  | -1.944503000 | 4.428253000  |
| H | 0.038041000  | -2.841706000 | 3.941167000  |
| H | 0.007802000  | -1.075922000 | 3.993500000  |
| C | 2.635701000  | -2.001997000 | -1.840174000 |
| H | 2.753669000  | -0.971107000 | -2.196338000 |
| C | 1.775281000  | -2.773295000 | -2.852183000 |
| H | 0.740637000  | -2.417943000 | -2.895626000 |
| H | 1.749764000  | -3.844174000 | -2.610071000 |
| H | 2.216808000  | -2.679893000 | -3.850605000 |
| C | 4.047689000  | -2.624070000 | -1.762388000 |
| H | 4.712921000  | -2.049469000 | -1.109018000 |
| H | 4.500419000  | -2.656697000 | -2.760033000 |
| H | 4.002048000  | -3.651468000 | -1.380162000 |
| C | -1.244498000 | -0.628747000 | -2.233773000 |
| O | -1.461045000 | -1.857402000 | -2.355764000 |
| C | -2.395125000 | 0.355387000  | -2.195698000 |
| C | -3.687023000 | -0.113543000 | -2.463884000 |
| C | -2.191225000 | 1.726056000  | -1.991525000 |

|   |              |              |              |
|---|--------------|--------------|--------------|
| C | -4.762313000 | 0.774345000  | -2.519610000 |
| H | -3.819179000 | -1.175156000 | -2.648011000 |
| C | -3.266321000 | 2.613318000  | -2.039816000 |
| H | -1.192242000 | 2.095515000  | -1.782165000 |
| C | -4.554998000 | 2.139169000  | -2.302905000 |
| H | -5.760176000 | 0.404264000  | -2.742072000 |
| H | -3.098402000 | 3.674736000  | -1.876516000 |
| H | -5.391433000 | 2.831927000  | -2.347853000 |
| H | -0.691117000 | -0.396439000 | -0.915018000 |
| H | -0.324266000 | -0.190254000 | -2.679376000 |

(F)

|    |              |              |              |
|----|--------------|--------------|--------------|
| Ru | -1.386320000 | -0.636917000 | -0.109095000 |
| O  | 1.716461000  | 1.752112000  | -1.911240000 |
| O  | -1.629276000 | 3.643671000  | 0.530965000  |
| N  | 0.052910000  | 0.863354000  | -0.574639000 |
| N  | 0.836705000  | -1.623405000 | -1.829604000 |
| N  | 0.438474000  | -3.141581000 | -0.394110000 |
| N  | 1.470652000  | -3.630844000 | -1.161904000 |
| C  | 0.015079000  | -1.911661000 | -0.769183000 |
| C  | 1.689288000  | -2.678525000 | -2.023436000 |
| H  | 2.442244000  | -2.710170000 | -2.797627000 |
| C  | 0.000505000  | -3.916749000 | 0.767052000  |
| H  | -0.393825000 | -4.873057000 | 0.404576000  |
| H  | -0.815639000 | -3.342783000 | 1.208454000  |
| C  | 1.131602000  | -4.133627000 | 1.771607000  |
| H  | 0.743912000  | -4.671779000 | 2.644008000  |
| H  | 1.554256000  | -3.179222000 | 2.100380000  |
| H  | 1.933928000  | -4.729725000 | 1.327413000  |
| C  | 0.797215000  | -0.355059000 | -2.555648000 |
| H  | -0.125509000 | -0.314930000 | -3.146380000 |
| H  | 1.653053000  | -0.318828000 | -3.230647000 |
| C  | 0.885434000  | 0.865253000  | -1.617699000 |
| C  | 0.204878000  | 2.024380000  | 0.320549000  |
| H  | 1.272609000  | 2.250487000  | 0.427792000  |
| H  | -0.189733000 | 1.750274000  | 1.300629000  |
| C  | -0.489958000 | 3.268682000  | -0.147440000 |
| C  | -0.243189000 | 4.166495000  | -1.145823000 |
| H  | 0.586829000  | 4.107612000  | -1.834061000 |
| C  | -1.284819000 | 5.150449000  | -1.087968000 |
| H  | -1.406259000 | 6.015695000  | -1.725620000 |
| C  | -2.093975000 | 4.788465000  | -0.055408000 |
| H  | -2.982502000 | 5.214077000  | 0.386060000  |
| C  | -3.291250000 | -1.284878000 | -1.510886000 |
| C  | -3.289237000 | 0.111776000  | -1.453410000 |
| H  | -3.288096000 | 0.694358000  | -2.369427000 |

|   |              |              |              |
|---|--------------|--------------|--------------|
| C | -3.264627000 | 0.795645000  | -0.193258000 |
| H | -3.221848000 | 1.879162000  | -0.189632000 |
| C | -3.308002000 | 0.112337000  | 1.035531000  |
| C | -3.231383000 | -1.322541000 | 0.977915000  |
| H | -3.216949000 | -1.902204000 | 1.893726000  |
| C | -3.205277000 | -1.997077000 | -0.264577000 |
| H | -3.161604000 | -3.082189000 | -0.277763000 |
| C | -3.368691000 | -2.036594000 | -2.815068000 |
| H | -4.379095000 | -2.438549000 | -2.968478000 |
| H | -2.675440000 | -2.884526000 | -2.830112000 |
| H | -3.135947000 | -1.387113000 | -3.664448000 |
| C | -3.457521000 | 0.880463000  | 2.340164000  |
| H | -3.066581000 | 1.887977000  | 2.152676000  |
| C | -2.670634000 | 0.285166000  | 3.517816000  |
| H | -1.613278000 | 0.160567000  | 3.265420000  |
| H | -3.065893000 | -0.692053000 | 3.821786000  |
| H | -2.745927000 | 0.947440000  | 4.387619000  |
| C | -4.954942000 | 1.012526000  | 2.693583000  |
| H | -5.516914000 | 1.492985000  | 1.884987000  |
| H | -5.082535000 | 1.613643000  | 3.601336000  |
| H | -5.404073000 | 0.028344000  | 2.876880000  |
| H | -0.518378000 | -0.773235000 | 1.218908000  |
| C | 3.343512000  | -0.490379000 | 1.245059000  |
| O | 3.258494000  | -1.333578000 | 2.124519000  |
| C | 4.590139000  | 0.221324000  | 0.888022000  |
| C | 4.582736000  | 1.160071000  | -0.155429000 |
| C | 5.777886000  | -0.046073000 | 1.589141000  |
| C | 5.762494000  | 1.827154000  | -0.490632000 |
| H | 3.664080000  | 1.368510000  | -0.703229000 |
| C | 6.949110000  | 0.622056000  | 1.250466000  |
| H | 5.753067000  | -0.777939000 | 2.391009000  |
| C | 6.940931000  | 1.559941000  | 0.209495000  |
| H | 5.759902000  | 2.555102000  | -1.297190000 |
| H | 7.869630000  | 0.418765000  | 1.791281000  |
| H | 7.857588000  | 2.081978000  | -0.053673000 |
| H | 2.452564000  | -0.208739000 | 0.648188000  |

**(B)**

|    |              |              |              |
|----|--------------|--------------|--------------|
| Ru | -2.058973000 | -0.401723000 | -0.149778000 |
| O  | 2.151227000  | 0.460746000  | -0.028701000 |
| O  | -0.999683000 | 3.621995000  | 0.979820000  |
| N  | -0.122327000 | 0.329178000  | 0.349894000  |
| N  | 0.128884000  | -2.360031000 | -0.627034000 |
| N  | -1.497042000 | -3.433755000 | 0.223782000  |
| N  | -0.496923000 | -4.365690000 | 0.055613000  |
| C  | -1.154094000 | -2.185784000 | -0.174350000 |

|   |              |              |              |
|---|--------------|--------------|--------------|
| C | 0.477918000  | -3.675084000 | -0.464022000 |
| H | 1.440133000  | -4.081870000 | -0.739868000 |
| C | -2.726312000 | -3.848123000 | 0.895338000  |
| H | -3.094636000 | -4.741939000 | 0.381661000  |
| H | -3.438796000 | -3.034912000 | 0.750087000  |
| C | -2.504305000 | -4.122844000 | 2.382178000  |
| H | -3.442232000 | -4.452071000 | 2.842779000  |
| H | -2.165503000 | -3.215718000 | 2.892558000  |
| H | -1.755233000 | -4.907539000 | 2.523191000  |
| C | 0.954496000  | -1.272155000 | -1.148383000 |
| H | 0.557353000  | -0.963159000 | -2.122666000 |
| H | 1.968214000  | -1.649689000 | -1.287240000 |
| C | 1.027227000  | -0.063058000 | -0.196853000 |
| C | 0.015124000  | 1.415684000  | 1.335368000  |
| H | 0.931561000  | 1.244423000  | 1.912912000  |
| H | -0.836948000 | 1.365257000  | 2.016151000  |
| C | 0.078299000  | 2.795526000  | 0.749926000  |
| C | 1.008041000  | 3.462331000  | 0.004866000  |
| H | 1.952271000  | 3.047447000  | -0.315200000 |
| C | 0.479884000  | 4.771858000  | -0.244911000 |
| H | 0.949715000  | 5.574076000  | -0.797753000 |
| C | -0.734117000 | 4.816681000  | 0.369003000  |
| H | -1.489284000 | 5.579810000  | 0.482614000  |
| C | -3.012893000 | -0.303445000 | -2.407354000 |
| C | -2.530639000 | 0.975398000  | -2.116173000 |
| H | -1.826512000 | 1.456947000  | -2.787595000 |
| C | -2.936234000 | 1.665526000  | -0.926222000 |
| H | -2.517645000 | 2.644519000  | -0.722591000 |
| C | -3.865569000 | 1.120781000  | -0.023231000 |
| C | -4.301658000 | -0.225668000 | -0.276038000 |
| H | -4.990806000 | -0.710526000 | 0.405743000  |
| C | -3.864766000 | -0.921434000 | -1.426706000 |
| H | -4.220521000 | -1.932883000 | -1.600903000 |
| C | -2.650277000 | -1.034691000 | -3.674347000 |
| H | -3.491324000 | -1.026967000 | -4.380369000 |
| H | -2.403128000 | -2.082703000 | -3.472749000 |
| H | -1.793838000 | -0.569198000 | -4.171609000 |
| C | -4.395830000 | 1.955948000  | 1.132187000  |
| H | -3.637896000 | 2.722841000  | 1.333064000  |
| C | -4.619677000 | 1.168456000  | 2.432074000  |
| H | -3.710987000 | 0.639977000  | 2.735352000  |
| H | -5.426457000 | 0.431794000  | 2.331106000  |
| H | -4.908847000 | 1.854389000  | 3.236221000  |
| C | -5.692333000 | 2.672781000  | 0.696200000  |
| H | -5.529462000 | 3.288846000  | -0.194972000 |
| H | -6.057800000 | 3.323895000  | 1.498649000  |

|   |              |              |              |
|---|--------------|--------------|--------------|
| H | -6.483739000 | 1.948830000  | 0.464800000  |
| H | -2.120464000 | -0.749163000 | 1.404525000  |
| C | 5.944355000  | -0.490775000 | 1.789125000  |
| O | 6.781114000  | -0.596487000 | 2.675826000  |
| C | 6.352027000  | -0.080718000 | 0.403463000  |
| C | 5.421881000  | 0.175334000  | -0.617008000 |
| C | 7.724544000  | 0.051788000  | 0.135121000  |
| C | 5.869567000  | 0.555202000  | -1.884623000 |
| H | 4.352927000  | 0.105929000  | -0.432112000 |
| C | 8.165022000  | 0.425212000  | -1.130647000 |
| H | 8.424393000  | -0.144620000 | 0.941090000  |
| C | 7.235473000  | 0.677799000  | -2.145364000 |
| H | 5.145209000  | 0.762150000  | -2.668381000 |
| H | 9.229236000  | 0.522310000  | -1.329819000 |
| H | 7.577090000  | 0.973204000  | -3.134498000 |
| C | 4.484553000  | -0.803612000 | 2.063085000  |
| H | 3.810235000  | -0.007312000 | 1.732482000  |
| H | 4.187956000  | -1.704402000 | 1.509456000  |
| H | 4.362936000  | -0.987566000 | 3.132571000  |

**(D)**

|    |              |              |              |
|----|--------------|--------------|--------------|
| Ru | 0.407464000  | -0.379281000 | -0.109518000 |
| O  | -0.285218000 | 3.829747000  | 0.351882000  |
| O  | -3.612306000 | 0.734689000  | 1.017405000  |
| N  | -0.247868000 | 1.528279000  | 0.562057000  |
| N  | 2.490712000  | 1.741387000  | -0.243778000 |
| N  | 3.430359000  | -0.010290000 | 0.510656000  |
| N  | 4.414357000  | 0.953611000  | 0.506294000  |
| C  | 2.229751000  | 0.431819000  | 0.067191000  |
| C  | 3.803872000  | 2.006956000  | 0.040917000  |
| H  | 4.269125000  | 2.970364000  | -0.109606000 |
| C  | 3.737747000  | -1.318500000 | 1.081461000  |
| H  | 4.654998000  | -1.677540000 | 0.603659000  |
| H  | 2.909749000  | -1.971085000 | 0.800219000  |
| C  | 3.897550000  | -1.259292000 | 2.600191000  |
| H  | 4.150590000  | -2.252738000 | 2.986821000  |
| H  | 2.965140000  | -0.929747000 | 3.069402000  |
| H  | 4.696580000  | -0.565493000 | 2.877851000  |
| C  | 1.475589000  | 2.665299000  | -0.748336000 |
| H  | 1.217285000  | 2.376390000  | -1.774049000 |
| H  | 1.900440000  | 3.669633000  | -0.762055000 |
| C  | 0.208283000  | 2.709255000  | 0.129382000  |
| C  | -1.376635000 | 1.630943000  | 1.499734000  |
| H  | -1.210326000 | 2.504532000  | 2.142353000  |
| H  | -1.385368000 | 0.735300000  | 2.124891000  |
| C  | -2.723536000 | 1.774285000  | 0.853040000  |



|   |              |              |              |
|---|--------------|--------------|--------------|
| C | -3.304901000 | 2.750351000  | 0.095490000  |
| H | -2.826404000 | 3.678915000  | -0.178734000 |
| C | -4.623526000 | 2.291986000  | -0.232812000 |
| H | -5.372278000 | 2.810686000  | -0.816368000 |
| C | -4.759490000 | 1.070008000  | 0.351838000  |
| H | -5.563015000 | 0.351280000  | 0.410000000  |
| C | 0.409343000  | -1.054549000 | -2.461536000 |
| C | -0.852845000 | -0.517012000 | -2.192141000 |
| H | -1.238590000 | 0.296591000  | -2.798397000 |
| C | -1.646927000 | -1.007152000 | -1.103395000 |
| H | -2.608085000 | -0.544735000 | -0.909477000 |
| C | -1.227349000 | -2.075671000 | -0.291015000 |
| C | 0.100270000  | -2.578776000 | -0.516516000 |
| H | 0.491612000  | -3.376508000 | 0.103985000  |
| C | 0.899505000  | -2.064853000 | -1.562768000 |
| H | 1.894474000  | -2.471670000 | -1.718726000 |
| C | 1.247239000  | -0.600544000 | -3.629349000 |
| H | 1.216810000  | -1.342258000 | -4.438676000 |
| H | 2.296835000  | -0.474317000 | -3.342182000 |
| H | 0.885312000  | 0.349175000  | -4.035033000 |
| C | -2.170865000 | -2.672140000 | 0.742947000  |
| H | -2.858047000 | -1.869295000 | 1.035435000  |
| C | -1.474108000 | -3.178078000 | 2.014935000  |
| H | -0.850713000 | -2.397252000 | 2.461152000  |
| H | -0.840576000 | -4.051256000 | 1.814473000  |
| H | -2.224372000 | -3.487402000 | 2.751264000  |
| C | -3.004987000 | -3.796878000 | 0.091764000  |
| H | -3.561230000 | -3.429876000 | -0.777821000 |
| H | -3.725662000 | -4.204963000 | 0.810045000  |
| H | -2.362405000 | -4.620686000 | -0.243711000 |
| H | 0.653110000  | -0.638845000 | 1.445056000  |

#### 1,4-TS<sup>II</sup>

|    |              |              |              |
|----|--------------|--------------|--------------|
| Ru | -1.057836000 | 0.323651000  | 0.704185000  |
| O  | 1.017107000  | -3.451883000 | 0.540677000  |
| O  | -3.101567000 | -3.214197000 | -0.965937000 |
| N  | -0.304590000 | -1.591466000 | 0.209132000  |
| N  | 1.493699000  | -0.321885000 | 2.160853000  |
| N  | 1.363469000  | 1.794386000  | 1.994504000  |
| N  | 2.540182000  | 1.554646000  | 2.665353000  |
| C  | 0.682340000  | 0.663664000  | 1.667541000  |
| C  | 2.589245000  | 0.256493000  | 2.742514000  |
| H  | 3.394315000  | -0.303586000 | 3.195185000  |
| C  | 0.953497000  | 3.186339000  | 1.766930000  |
| H  | 0.247062000  | 3.471930000  | 2.555286000  |
| H  | 0.422535000  | 3.204250000  | 0.814133000  |

|   |              |              |              |
|---|--------------|--------------|--------------|
| C | 2.131629000  | 4.154605000  | 1.761846000  |
| H | 1.757406000  | 5.156239000  | 1.526097000  |
| H | 2.869096000  | 3.877591000  | 1.004656000  |
| H | 2.631976000  | 4.183192000  | 2.732142000  |
| C | 1.190664000  | -1.750946000 | 2.159658000  |
| H | 0.486519000  | -1.958448000 | 2.975650000  |
| H | 2.117969000  | -2.289090000 | 2.357559000  |
| C | 0.618543000  | -2.314950000 | 0.852984000  |
| C | -0.832719000 | -2.273290000 | -0.992730000 |
| H | 0.018504000  | -2.617881000 | -1.589285000 |
| H | -1.369028000 | -1.533410000 | -1.589881000 |
| C | -1.757393000 | -3.426438000 | -0.723462000 |
| C | -1.582390000 | -4.713053000 | -0.300124000 |
| H | -0.630721000 | -5.144878000 | -0.033039000 |
| C | -2.877105000 | -5.328862000 | -0.274212000 |
| H | -3.113078000 | -6.346277000 | 0.007405000  |
| C | -3.759797000 | -4.380335000 | -0.687324000 |
| H | -4.827497000 | -4.366598000 | -0.847366000 |
| C | -2.363712000 | 1.166683000  | 2.465146000  |
| C | -2.819177000 | -0.150556000 | 2.208889000  |
| H | -2.807670000 | -0.893644000 | 2.998986000  |
| C | -3.279366000 | -0.503210000 | 0.914745000  |
| H | -3.589435000 | -1.525947000 | 0.729459000  |
| C | -3.338817000 | 0.424287000  | -0.151178000 |
| C | -2.798274000 | 1.723301000  | 0.102354000  |
| H | -2.763628000 | 2.459724000  | -0.692402000 |
| C | -2.370479000 | 2.109660000  | 1.395458000  |
| H | -2.034715000 | 3.126032000  | 1.566864000  |
| C | -1.949018000 | 1.569874000  | 3.858416000  |
| H | -2.823867000 | 1.916241000  | 4.423911000  |
| H | -1.220058000 | 2.384718000  | 3.849854000  |
| H | -1.513866000 | 0.726194000  | 4.402625000  |
| C | -4.064449000 | 0.045929000  | -1.435310000 |
| H | -4.008693000 | -1.044332000 | -1.516267000 |
| C | -3.469673000 | 0.634839000  | -2.720721000 |
| H | -2.419476000 | 0.351973000  | -2.842673000 |
| H | -3.541531000 | 1.729178000  | -2.744694000 |
| H | -4.020042000 | 0.258324000  | -3.590046000 |
| C | -5.555042000 | 0.432190000  | -1.305236000 |
| H | -6.013071000 | -0.029330000 | -0.423378000 |
| H | -6.113795000 | 0.103894000  | -2.189466000 |
| H | -5.674678000 | 1.519357000  | -1.215830000 |
| C | 2.518708000  | -0.848081000 | -1.739072000 |
| O | 1.787374000  | -1.559919000 | -2.445602000 |
| C | 3.819298000  | -1.411447000 | -1.226500000 |
| C | 4.949811000  | -0.618858000 | -0.973136000 |

|   |              |              |              |
|---|--------------|--------------|--------------|
| C | 3.898686000  | -2.796969000 | -1.013447000 |
| C | 6.135989000  | -1.197773000 | -0.519376000 |
| H | 4.917044000  | 0.450803000  | -1.160841000 |
| C | 5.077722000  | -3.371006000 | -0.541138000 |
| H | 3.015000000  | -3.398289000 | -1.193711000 |
| C | 6.200795000  | -2.575132000 | -0.296675000 |
| H | 7.009655000  | -0.574644000 | -0.344515000 |
| H | 5.121253000  | -4.442609000 | -0.363913000 |
| H | 7.122651000  | -3.026065000 | 0.062571000  |
| C | 2.170788000  | 0.512709000  | -1.377853000 |
| C | 0.922047000  | 1.044618000  | -1.693282000 |
| C | 0.723850000  | 2.516897000  | -1.903300000 |
| C | -0.500480000 | 2.990984000  | -2.401803000 |
| C | 1.751742000  | 3.453441000  | -1.704866000 |
| C | -0.705240000 | 4.345458000  | -2.664309000 |
| H | -1.292769000 | 2.279068000  | -2.603275000 |
| C | 1.550003000  | 4.811302000  | -1.957586000 |
| H | 2.730431000  | 3.115060000  | -1.382181000 |
| C | 0.318531000  | 5.266822000  | -2.432728000 |
| H | -1.659975000 | 4.679815000  | -3.062980000 |
| H | 2.366279000  | 5.511969000  | -1.801382000 |
| H | 0.166118000  | 6.322448000  | -2.640698000 |
| H | 0.354266000  | 0.418492000  | -2.383618000 |
| H | 2.868580000  | 1.079926000  | -0.770674000 |
| H | 0.008541000  | 0.791065000  | -0.613115000 |

**(J)**

|    |              |              |              |
|----|--------------|--------------|--------------|
| Ru | 0.821998000  | 0.844612000  | 0.452601000  |
| O  | 2.081704000  | -0.726682000 | -3.360385000 |
| O  | 2.814276000  | -3.162262000 | 0.320243000  |
| N  | 1.262507000  | -0.383503000 | -1.234705000 |
| N  | 0.825873000  | 2.402371000  | -2.110495000 |
| N  | -0.389272000 | 3.465065000  | -0.728566000 |
| N  | -0.357333000 | 4.248011000  | -1.858183000 |
| C  | 0.318225000  | 2.309990000  | -0.840211000 |
| C  | 0.389399000  | 3.570492000  | -2.676999000 |
| H  | 0.644177000  | 3.881240000  | -3.679860000 |
| C  | -1.237954000 | 3.924859000  | 0.368931000  |
| H  | -0.789549000 | 4.834197000  | 0.788318000  |
| H  | -1.201091000 | 3.143018000  | 1.125340000  |
| C  | -2.669857000 | 4.195028000  | -0.092203000 |
| H  | -3.291803000 | 4.454395000  | 0.771717000  |
| H  | -3.079671000 | 3.307100000  | -0.580431000 |
| H  | -2.695893000 | 5.024225000  | -0.803646000 |
| C  | 1.806439000  | 1.512418000  | -2.724279000 |
| H  | 2.811442000  | 1.832949000  | -2.418085000 |

|   |              |              |              |
|---|--------------|--------------|--------------|
| H | 1.734274000  | 1.631737000  | -3.806170000 |
| C | 1.684778000  | 0.013037000  | -2.440952000 |
| C | 1.295658000  | -1.851183000 | -1.082486000 |
| H | 0.876830000  | -2.302463000 | -1.988276000 |
| H | 0.656567000  | -2.132483000 | -0.244286000 |
| C | 2.659641000  | -2.436051000 | -0.842283000 |
| C | 3.836958000  | -2.445384000 | -1.535133000 |
| H | 3.987554000  | -1.970954000 | -2.492692000 |
| C | 4.772214000  | -3.208120000 | -0.759791000 |
| H | 5.801901000  | -3.428639000 | -1.007294000 |
| C | 4.102193000  | -3.622252000 | 0.349835000  |
| H | 4.364834000  | -4.228353000 | 1.203709000  |
| C | 2.278607000  | 2.364718000  | 1.555575000  |
| C | 3.066389000  | 1.257326000  | 1.177842000  |
| H | 3.923905000  | 1.395090000  | 0.527797000  |
| C | 2.729113000  | -0.048705000 | 1.624427000  |
| H | 3.343604000  | -0.881289000 | 1.299302000  |
| C | 1.645268000  | -0.296344000 | 2.492799000  |
| C | 0.817444000  | 0.824730000  | 2.805443000  |
| H | -0.055016000 | 0.683259000  | 3.433004000  |
| C | 1.140285000  | 2.132978000  | 2.389699000  |
| H | 0.528253000  | 2.968354000  | 2.712279000  |
| C | 2.660260000  | 3.765939000  | 1.149982000  |
| H | 3.211741000  | 4.256533000  | 1.962522000  |
| H | 1.779670000  | 4.376827000  | 0.931439000  |
| H | 3.302962000  | 3.762936000  | 0.264667000  |
| C | 1.464460000  | -1.674315000 | 3.115555000  |
| H | 1.777075000  | -2.405983000 | 2.362819000  |
| C | 0.024054000  | -2.008275000 | 3.526926000  |
| H | -0.674149000 | -1.912166000 | 2.690422000  |
| H | -0.328884000 | -1.366198000 | 4.344099000  |
| H | -0.025786000 | -3.041354000 | 3.888185000  |
| C | 2.414046000  | -1.816393000 | 4.326484000  |
| H | 3.457772000  | -1.647125000 | 4.039790000  |
| H | 2.338583000  | -2.822488000 | 4.755647000  |
| H | 2.159739000  | -1.094671000 | 5.113031000  |
| C | -1.732023000 | 0.016077000  | -1.103645000 |
| O | -2.113658000 | 1.058755000  | -1.645046000 |
| C | -1.838053000 | -1.260937000 | -1.895915000 |
| C | -1.760806000 | -1.184564000 | -3.295779000 |
| C | -2.096552000 | -2.504409000 | -1.300068000 |
| C | -1.897875000 | -2.327080000 | -4.078840000 |
| H | -1.585786000 | -0.215887000 | -3.751763000 |
| C | -2.261044000 | -3.646491000 | -2.086160000 |
| H | -2.201683000 | -2.579246000 | -0.222456000 |
| C | -2.150220000 | -3.563023000 | -3.474928000 |

|   |              |              |              |
|---|--------------|--------------|--------------|
| H | -1.810083000 | -2.256982000 | -5.159735000 |
| H | -2.475093000 | -4.600937000 | -1.612260000 |
| H | -2.263189000 | -4.455214000 | -4.085500000 |
| C | -1.228183000 | 0.007299000  | 0.312659000  |
| C | -2.283916000 | 0.651109000  | 1.250295000  |
| C | -3.531148000 | -0.197908000 | 1.454054000  |
| C | -4.569989000 | -0.200043000 | 0.508606000  |
| C | -3.675244000 | -1.004561000 | 2.592261000  |
| C | -5.706806000 | -0.987880000 | 0.693582000  |
| H | -4.483118000 | 0.421099000  | -0.378515000 |
| C | -4.811535000 | -1.794545000 | 2.781645000  |
| H | -2.892020000 | -1.004930000 | 3.347316000  |
| C | -5.832549000 | -1.790045000 | 1.830317000  |
| H | -6.498489000 | -0.971685000 | -0.051284000 |
| H | -4.900522000 | -2.407628000 | 3.675285000  |
| H | -6.719683000 | -2.401083000 | 1.974993000  |
| H | -1.845287000 | 0.855238000  | 2.232087000  |
| H | -1.048339000 | -1.020383000 | 0.640950000  |
| H | -2.584731000 | 1.609972000  | 0.824777000  |

### 1,2-TS<sup>II</sup>

|    |              |              |              |
|----|--------------|--------------|--------------|
| Ru | 0.690744000  | -0.621405000 | 0.858211000  |
| O  | 1.063950000  | -3.305095000 | -2.489419000 |
| O  | -2.831181000 | -3.051444000 | -0.351020000 |
| N  | 0.376523000  | -1.826980000 | -0.860434000 |
| N  | 3.252825000  | -1.329675000 | -0.547272000 |
| N  | 3.515551000  | 0.605081000  | 0.292563000  |
| N  | 4.713927000  | 0.304155000  | -0.308760000 |
| C  | 2.590285000  | -0.377330000 | 0.180076000  |
| C  | 4.516936000  | -0.877422000 | -0.816508000 |
| H  | 5.247525000  | -1.434501000 | -1.384662000 |
| C  | 3.377833000  | 1.881336000  | 1.009676000  |
| H  | 3.616739000  | 1.698457000  | 2.064468000  |
| H  | 2.329908000  | 2.180723000  | 0.929514000  |
| C  | 4.289240000  | 2.968616000  | 0.449667000  |
| H  | 4.094681000  | 3.897104000  | 0.997142000  |
| H  | 4.080944000  | 3.142660000  | -0.609072000 |
| H  | 5.345219000  | 2.710837000  | 0.559070000  |
| C  | 2.702214000  | -2.627946000 | -0.918533000 |
| H  | 2.716774000  | -3.282634000 | -0.037648000 |
| H  | 3.346977000  | -3.064319000 | -1.682060000 |
| C  | 1.280452000  | -2.584389000 | -1.498809000 |
| C  | -0.969902000 | -1.914124000 | -1.462536000 |
| H  | -0.874400000 | -1.819616000 | -2.552292000 |
| H  | -1.562186000 | -1.076237000 | -1.093034000 |

|   |              |              |              |
|---|--------------|--------------|--------------|
| C | -1.728943000 | -3.177954000 | -1.170724000 |
| C | -1.601994000 | -4.483027000 | -1.553081000 |
| H | -0.824817000 | -4.860936000 | -2.199403000 |
| C | -2.674645000 | -5.205468000 | -0.933221000 |
| H | -2.888303000 | -6.262298000 | -1.019380000 |
| C | -3.388599000 | -4.292523000 | -0.219528000 |
| H | -4.279397000 | -4.344482000 | 0.388197000  |
| C | 0.006337000  | -2.360089000 | 2.338363000  |
| C | -1.124669000 | -1.546382000 | 1.995634000  |
| H | -1.975451000 | -2.004983000 | 1.506239000  |
| C | -1.119417000 | -0.163163000 | 2.223953000  |
| H | -1.973082000 | 0.424434000  | 1.904732000  |
| C | -0.015602000 | 0.493842000  | 2.874194000  |
| C | 1.111432000  | -0.302806000 | 3.150902000  |
| H | 1.991290000  | 0.147053000  | 3.595511000  |
| C | 1.126774000  | -1.713087000 | 2.889799000  |
| H | 2.015209000  | -2.286759000 | 3.137016000  |
| C | -0.010600000 | -3.849550000 | 2.092143000  |
| H | -1.009093000 | -4.191956000 | 1.809226000  |
| H | 0.298927000  | -4.394683000 | 2.991309000  |
| H | 0.667096000  | -4.125254000 | 1.278025000  |
| C | -0.135947000 | 1.967482000  | 3.240771000  |
| H | -0.242093000 | 2.514151000  | 2.293118000  |
| C | 1.085454000  | 2.533043000  | 3.977221000  |
| H | 2.001956000  | 2.448283000  | 3.387760000  |
| H | 1.247107000  | 2.032644000  | 4.941167000  |
| H | 0.928671000  | 3.597486000  | 4.181003000  |
| C | -1.402315000 | 2.206807000  | 4.092630000  |
| H | -2.317084000 | 1.888002000  | 3.583440000  |
| H | -1.503914000 | 3.275397000  | 4.312603000  |
| H | -1.344479000 | 1.670480000  | 5.048437000  |
| C | 0.061457000  | 2.088055000  | -0.682038000 |
| O | 0.320192000  | 2.926341000  | 0.225288000  |
| C | 0.971811000  | 2.070141000  | -1.915658000 |
| C | 1.715169000  | 3.229488000  | -2.173830000 |
| C | 1.033951000  | 1.008171000  | -2.827225000 |
| C | 2.502446000  | 3.327603000  | -3.322452000 |
| H | 1.651046000  | 4.048497000  | -1.465138000 |
| C | 1.827157000  | 1.102144000  | -3.971563000 |
| H | 0.488131000  | 0.092463000  | -2.629648000 |
| C | 2.562114000  | 2.263330000  | -4.224716000 |
| H | 3.065223000  | 4.237737000  | -3.515341000 |
| H | 1.870184000  | 0.265678000  | -4.664453000 |
| H | 3.175336000  | 2.337813000  | -5.119111000 |
| H | 0.392932000  | 0.776642000  | -0.162776000 |
| C | -1.382981000 | 1.771861000  | -0.999154000 |

|   |              |             |              |
|---|--------------|-------------|--------------|
| C | -2.383881000 | 2.448758000 | -0.410186000 |
| H | -1.567887000 | 1.031376000 | -1.770846000 |
| H | -2.090469000 | 3.209574000 | 0.312047000  |
| C | -3.825403000 | 2.306636000 | -0.645585000 |
| C | -4.383718000 | 1.301759000 | -1.460482000 |
| C | -4.704648000 | 3.214285000 | -0.025825000 |
| C | -5.759946000 | 1.216823000 | -1.649425000 |
| H | -3.735780000 | 0.578545000 | -1.947172000 |
| C | -6.083340000 | 3.130826000 | -0.214991000 |
| H | -4.292623000 | 3.997027000 | 0.607044000  |
| C | -6.617935000 | 2.130980000 | -1.028992000 |
| H | -6.167047000 | 0.432277000 | -2.281955000 |
| H | -6.739458000 | 3.846963000 | 0.272935000  |
| H | -7.691983000 | 2.061341000 | -1.178587000 |

**(1,2-J)**

|    |              |              |              |
|----|--------------|--------------|--------------|
| Ru | -1.255802000 | 0.507921000  | -0.741513000 |
| O  | -4.219278000 | 0.353286000  | 2.306162000  |
| O  | -1.836015000 | -3.384658000 | 0.896051000  |
| N  | -2.289199000 | 0.115392000  | 1.054412000  |
| N  | -2.521637000 | 2.910883000  | 0.454108000  |
| N  | -0.599680000 | 3.477257000  | -0.268083000 |
| N  | -1.120837000 | 4.613751000  | 0.305078000  |
| C  | -1.428694000 | 2.416172000  | -0.194241000 |
| C  | -2.288524000 | 4.230384000  | 0.738767000  |
| H  | -2.993877000 | 4.866907000  | 1.252918000  |
| C  | 0.751170000  | 3.531597000  | -0.833178000 |
| H  | 0.719340000  | 4.195035000  | -1.705380000 |
| H  | 0.979918000  | 2.513562000  | -1.143072000 |
| C  | 1.774358000  | 4.019951000  | 0.188383000  |
| H  | 2.766205000  | 4.047168000  | -0.275984000 |
| H  | 1.805027000  | 3.329577000  | 1.034881000  |
| H  | 1.529441000  | 5.023221000  | 0.547785000  |
| C  | -3.690838000 | 2.115734000  | 0.823386000  |
| H  | -4.310923000 | 1.966581000  | -0.067803000 |
| H  | -4.272403000 | 2.688482000  | 1.547174000  |
| C  | -3.393429000 | 0.745767000  | 1.461644000  |
| C  | -1.991934000 | -1.114610000 | 1.795163000  |
| H  | -2.286321000 | -0.963676000 | 2.841036000  |
| H  | -0.915944000 | -1.277958000 | 1.775587000  |
| C  | -2.662488000 | -2.351084000 | 1.272423000  |
| C  | -3.962829000 | -2.715371000 | 1.059945000  |
| H  | -4.820206000 | -2.104006000 | 1.300001000  |
| C  | -3.940963000 | -4.047214000 | 0.527704000  |
| H  | -4.790182000 | -4.658007000 | 0.251382000  |
| C  | -2.628702000 | -4.405558000 | 0.449781000  |

|   |              |              |              |
|---|--------------|--------------|--------------|
| H | -2.112927000 | -5.303899000 | 0.145659000  |
| C | -2.497494000 | 0.792372000  | -2.666033000 |
| C | -2.920730000 | -0.388635000 | -2.017912000 |
| H | -3.946684000 | -0.484785000 | -1.679618000 |
| C | -2.041013000 | -1.510282000 | -1.874658000 |
| H | -2.433994000 | -2.419482000 | -1.434473000 |
| C | -0.700354000 | -1.439289000 | -2.257809000 |
| C | -0.225959000 | -0.175123000 | -2.768289000 |
| H | 0.822150000  | -0.048590000 | -3.007622000 |
| C | -1.109844000 | 0.885591000  | -3.020444000 |
| H | -0.734189000 | 1.803824000  | -3.462884000 |
| C | -3.457440000 | 1.898337000  | -3.021095000 |
| H | -3.722790000 | 1.839311000  | -4.084926000 |
| H | -3.020240000 | 2.887069000  | -2.845142000 |
| H | -4.385753000 | 1.822496000  | -2.447085000 |
| C | 0.177296000  | -2.689192000 | -2.171891000 |
| H | 0.140482000  | -3.038035000 | -1.131480000 |
| C | 1.646577000  | -2.459177000 | -2.549470000 |
| H | 2.115501000  | -1.682767000 | -1.939916000 |
| H | 1.748360000  | -2.176989000 | -3.605094000 |
| H | 2.213898000  | -3.384688000 | -2.403369000 |
| C | -0.414014000 | -3.810074000 | -3.055571000 |
| H | -1.434445000 | -4.069701000 | -2.758128000 |
| H | 0.199523000  | -4.714953000 | -2.976147000 |
| H | -0.433935000 | -3.506967000 | -4.109532000 |
| C | 1.336154000  | -0.300772000 | 0.779005000  |
| O | 0.462461000  | 0.728185000  | 0.430407000  |
| C | 1.396796000  | -0.502108000 | 2.298130000  |
| C | 1.219727000  | 0.587900000  | 3.159375000  |
| C | 1.655928000  | -1.759645000 | 2.859470000  |
| C | 1.313903000  | 0.428940000  | 4.542276000  |
| H | 0.978288000  | 1.553508000  | 2.726437000  |
| C | 1.752614000  | -1.924251000 | 4.243545000  |
| H | 1.775341000  | -2.622698000 | 2.207142000  |
| C | 1.584499000  | -0.827610000 | 5.090628000  |
| H | 1.168583000  | 1.286058000  | 5.195837000  |
| H | 1.949637000  | -2.909745000 | 4.658786000  |
| H | 1.652559000  | -0.952415000 | 6.168427000  |
| C | 2.745876000  | 0.070983000  | 0.226044000  |
| H | 3.016101000  | 1.052267000  | 0.635995000  |
| C | 3.892504000  | -0.923517000 | 0.502591000  |
| H | 4.038108000  | -1.013088000 | 1.584492000  |
| H | 3.608745000  | -1.922454000 | 0.144304000  |
| C | 5.191216000  | -0.504156000 | -0.155152000 |
| C | 5.547389000  | -0.979132000 | -1.425325000 |
| C | 6.056684000  | 0.400742000  | 0.477447000  |



|   |             |              |              |
|---|-------------|--------------|--------------|
| C | 6.726064000 | -0.563183000 | -2.047717000 |
| H | 4.895432000 | -1.690105000 | -1.929405000 |
| C | 7.235591000 | 0.821134000  | -0.139877000 |
| H | 5.802067000 | 0.775410000  | 1.466692000  |
| C | 7.575123000 | 0.340882000  | -1.406927000 |
| H | 6.983508000 | -0.949718000 | -3.030969000 |
| H | 7.893176000 | 1.519887000  | 0.371473000  |
| H | 8.495334000 | 0.663558000  | -1.887066000 |
| H | 1.049327000 | -1.272730000 | 0.334101000  |
| H | 2.640850000 | 0.210534000  | -0.858728000 |

**(K)**

|    |              |              |              |
|----|--------------|--------------|--------------|
| Ru | -2.583429000 | 0.681104000  | 0.290695000  |
| O  | 0.827426000  | -1.769294000 | -0.662790000 |
| O  | -3.308607000 | -2.602670000 | -2.429344000 |
| N  | -1.145048000 | -0.568617000 | -0.667238000 |
| N  | 0.206191000  | 1.096636000  | 1.239378000  |
| N  | -0.660186000 | 3.022355000  | 1.015543000  |
| N  | 0.643718000  | 3.253166000  | 1.398381000  |
| C  | -0.967986000 | 1.711630000  | 0.892994000  |
| C  | 1.146005000  | 2.056156000  | 1.522983000  |
| H  | 2.170692000  | 1.833047000  | 1.788367000  |
| C  | -1.501667000 | 4.168511000  | 0.686660000  |
| H  | -1.463285000 | 4.859151000  | 1.535403000  |
| H  | -2.516313000 | 3.779576000  | 0.589663000  |
| C  | -1.054571000 | 4.860398000  | -0.600775000 |
| H  | -1.692396000 | 5.729510000  | -0.796641000 |
| H  | -1.130586000 | 4.174261000  | -1.450347000 |
| H  | -0.018948000 | 5.202145000  | -0.515763000 |
| C  | 0.375983000  | -0.355040000 | 1.219737000  |
| H  | -0.258885000 | -0.792103000 | 1.999270000  |
| H  | 1.415453000  | -0.584116000 | 1.448703000  |
| C  | 0.018169000  | -0.961537000 | -0.149251000 |
| C  | -1.415957000 | -1.095230000 | -2.015041000 |
| H  | -0.475657000 | -1.104072000 | -2.579828000 |
| H  | -2.114483000 | -0.418017000 | -2.510213000 |
| C  | -1.993108000 | -2.479949000 | -2.040176000 |
| C  | -1.491112000 | -3.716435000 | -1.751219000 |
| H  | -0.481171000 | -3.906999000 | -1.420012000 |
| C  | -2.550765000 | -4.657761000 | -1.969106000 |
| H  | -2.510799000 | -5.731568000 | -1.844915000 |
| C  | -3.626145000 | -3.932140000 | -2.381064000 |
| H  | -4.631800000 | -4.185479000 | -2.681046000 |
| C  | -3.663430000 | 0.198994000  | 2.447038000  |
| C  | -3.751216000 | -0.965747000 | 1.677264000  |
| H  | -3.389361000 | -1.909705000 | 2.073830000  |

|   |              |              |              |
|---|--------------|--------------|--------------|
| C | -4.307063000 | -0.935172000 | 0.356101000  |
| H | -4.329139000 | -1.853163000 | -0.220860000 |
| C | -4.845415000 | 0.236355000  | -0.207309000 |
| C | -4.680868000 | 1.448331000  | 0.547320000  |
| H | -5.039007000 | 2.390147000  | 0.148323000  |
| C | -4.087056000 | 1.426359000  | 1.831314000  |
| H | -3.995534000 | 2.353892000  | 2.388580000  |
| C | -3.109452000 | 0.189575000  | 3.854264000  |
| H | -3.508549000 | -0.655016000 | 4.426186000  |
| H | -3.371131000 | 1.109741000  | 4.385876000  |
| H | -2.017140000 | 0.104547000  | 3.860208000  |
| C | -5.589262000 | 0.181257000  | -1.533323000 |
| H | -5.174853000 | -0.670336000 | -2.086329000 |
| C | -5.417972000 | 1.433480000  | -2.406578000 |
| H | -4.360172000 | 1.664794000  | -2.564670000 |
| H | -5.898145000 | 2.312753000  | -1.959195000 |
| H | -5.888437000 | 1.272479000  | -3.383099000 |
| C | -7.085029000 | -0.103615000 | -1.275524000 |
| H | -7.224172000 | -1.029549000 | -0.706651000 |
| H | -7.625659000 | -0.201900000 | -2.224099000 |
| H | -7.548803000 | 0.712810000  | -0.707763000 |
| C | 4.076092000  | -0.406501000 | 0.612480000  |
| O | 4.100749000  | 0.694577000  | 1.158524000  |
| C | 4.178294000  | -1.650477000 | 1.442299000  |
| C | 3.668820000  | -2.885064000 | 1.007792000  |
| C | 4.784690000  | -1.559715000 | 2.705936000  |
| C | 3.777790000  | -4.010316000 | 1.825836000  |
| H | 3.141108000  | -2.954099000 | 0.062744000  |
| C | 4.908363000  | -2.688966000 | 3.510501000  |
| H | 5.159699000  | -0.594823000 | 3.032422000  |
| C | 4.405539000  | -3.917480000 | 3.069998000  |
| H | 3.368384000  | -4.959771000 | 1.491836000  |
| H | 5.393988000  | -2.614868000 | 4.479936000  |
| H | 4.498361000  | -4.799209000 | 3.698929000  |
| C | 3.905708000  | -0.550148000 | -0.889937000 |
| C | 4.123479000  | 0.754511000  | -1.679706000 |
| H | 2.878405000  | -0.919012000 | -1.045532000 |
| H | 3.578348000  | 1.562014000  | -1.180668000 |
| C | 5.581327000  | 1.138242000  | -1.848287000 |
| C | 6.222721000  | 1.993395000  | -0.940665000 |
| C | 6.327458000  | 0.626683000  | -2.920034000 |
| C | 7.569857000  | 2.324076000  | -1.099708000 |
| H | 5.658912000  | 2.390397000  | -0.101955000 |
| C | 7.674829000  | 0.953185000  | -3.081324000 |
| H | 5.843528000  | -0.030586000 | -3.640236000 |
| C | 8.301648000  | 1.805127000  | -2.169595000 |

|   |              |              |              |
|---|--------------|--------------|--------------|
| H | 8.047801000  | 2.991147000  | -0.386381000 |
| H | 8.232592000  | 0.547522000  | -3.921842000 |
| H | 9.349732000  | 2.064954000  | -2.294356000 |
| H | 3.669769000  | 0.624937000  | -2.669525000 |
| H | 4.570450000  | -1.342413000 | -1.256160000 |
| H | -2.363394000 | 1.592861000  | -0.997712000 |

**TS<sup>KL</sup>**

|    |              |              |              |
|----|--------------|--------------|--------------|
| Ru | 1.382998000  | -0.650222000 | -0.174154000 |
| O  | 2.037354000  | 2.190834000  | 2.995999000  |
| O  | 2.989672000  | 3.346240000  | -1.210487000 |
| N  | 1.579128000  | 1.090559000  | 1.023779000  |
| N  | 1.180892000  | -1.232419000 | 2.767991000  |
| N  | -0.055944000 | -2.635667000 | 1.758555000  |
| N  | -0.156036000 | -2.956058000 | 3.090552000  |
| C  | 0.763234000  | -1.585235000 | 1.513651000  |
| C  | 0.603909000  | -2.077955000 | 3.677560000  |
| H  | 0.760038000  | -2.012079000 | 4.744359000  |
| C  | -0.770790000 | -3.451802000 | 0.765107000  |
| H  | -0.050924000 | -4.159244000 | 0.335836000  |
| H  | -1.108294000 | -2.773336000 | -0.023191000 |
| C  | -1.947809000 | -4.211637000 | 1.367437000  |
| H  | -2.460082000 | -4.747635000 | 0.561121000  |
| H  | -2.658622000 | -3.524635000 | 1.833125000  |
| H  | -1.624210000 | -4.935556000 | 2.119139000  |
| C  | 2.139826000  | -0.173236000 | 3.059262000  |
| H  | 3.147260000  | -0.535427000 | 2.816733000  |
| H  | 2.099072000  | 0.037888000  | 4.128305000  |
| C  | 1.884614000  | 1.152772000  | 2.327432000  |
| C  | 1.403186000  | 2.423716000  | 0.412777000  |
| H  | 0.794551000  | 3.039826000  | 1.087192000  |
| H  | 0.859849000  | 2.301476000  | -0.524485000 |
| C  | 2.672926000  | 3.172317000  | 0.121114000  |
| C  | 3.629474000  | 3.769711000  | 0.891321000  |
| H  | 3.624971000  | 3.788721000  | 1.970388000  |
| C  | 4.593395000  | 4.337713000  | -0.006131000 |
| H  | 5.484443000  | 4.892470000  | 0.255128000  |
| C  | 4.157742000  | 4.055093000  | -1.264082000 |
| H  | 4.522999000  | 4.283231000  | -2.254084000 |
| C  | 3.672457000  | -0.641776000 | -0.832087000 |
| C  | 2.908085000  | 0.135744000  | -1.764308000 |
| H  | 3.153795000  | 1.181250000  | -1.906953000 |
| C  | 1.819181000  | -0.416128000 | -2.451524000 |
| H  | 1.258151000  | 0.212709000  | -3.133892000 |
| C  | 1.442002000  | -1.796355000 | -2.293862000 |
| C  | 2.166167000  | -2.539194000 | -1.342967000 |

|   |              |              |              |
|---|--------------|--------------|--------------|
| H | 1.904238000  | -3.573492000 | -1.155304000 |
| C | 3.266342000  | -1.971319000 | -0.618561000 |
| H | 3.799325000  | -2.588863000 | 0.098680000  |
| C | 4.851543000  | -0.037469000 | -0.106961000 |
| H | 5.715788000  | -0.710522000 | -0.137345000 |
| H | 4.614034000  | 0.163162000  | 0.942789000  |
| H | 5.142128000  | 0.915627000  | -0.556693000 |
| C | 0.332611000  | -2.369789000 | -3.166948000 |
| H | -0.582805000 | -1.819509000 | -2.906269000 |
| C | 0.056097000  | -3.860678000 | -2.933911000 |
| H | -0.243018000 | -4.068093000 | -1.903749000 |
| H | 0.929666000  | -4.480874000 | -3.174605000 |
| H | -0.765964000 | -4.184372000 | -3.580809000 |
| C | 0.648244000  | -2.134690000 | -4.660763000 |
| H | 0.786676000  | -1.075749000 | -4.900696000 |
| H | -0.178640000 | -2.505235000 | -5.276504000 |
| H | 1.558364000  | -2.668933000 | -4.961830000 |
| C | -1.710991000 | -0.117474000 | -0.686552000 |
| O | -1.997388000 | -1.148340000 | -1.356521000 |
| C | -2.302490000 | 0.001295000  | 0.718906000  |
| C | -3.351367000 | -0.861801000 | 1.062099000  |
| C | -1.882616000 | 0.957105000  | 1.654087000  |
| C | -3.968960000 | -0.772631000 | 2.310182000  |
| H | -3.679735000 | -1.586533000 | 0.324971000  |
| C | -2.491995000 | 1.041915000  | 2.906160000  |
| H | -1.059263000 | 1.621422000  | 1.417433000  |
| C | -3.538527000 | 0.177772000  | 3.238334000  |
| H | -4.791871000 | -1.439787000 | 2.555265000  |
| H | -2.148706000 | 1.785416000  | 3.620976000  |
| H | -4.018332000 | 0.249317000  | 4.211132000  |
| H | -0.320228000 | -0.238983000 | -0.298833000 |
| C | -1.566194000 | 1.211409000  | -1.480857000 |
| C | -2.780925000 | 1.465363000  | -2.406301000 |
| H | -1.413451000 | 2.060228000  | -0.807835000 |
| H | -2.509737000 | 2.293451000  | -3.075354000 |
| H | -2.909435000 | 0.575069000  | -3.030265000 |
| C | -4.087926000 | 1.798799000  | -1.717564000 |
| C | -4.301190000 | 3.066501000  | -1.156525000 |
| C | -5.122816000 | 0.857487000  | -1.642387000 |
| C | -5.508860000 | 3.383409000  | -0.534570000 |
| H | -3.513655000 | 3.815709000  | -1.213532000 |
| C | -6.334908000 | 1.170472000  | -1.023774000 |
| H | -4.969708000 | -0.130261000 | -2.070202000 |
| C | -6.532171000 | 2.434824000  | -0.466906000 |
| H | -5.653772000 | 4.372899000  | -0.108065000 |
| H | -7.125636000 | 0.425608000  | -0.978505000 |

|   |              |             |              |
|---|--------------|-------------|--------------|
| H | -7.475674000 | 2.681285000 | 0.013174000  |
| H | -0.681883000 | 1.131847000 | -2.119331000 |

(L)

|    |              |              |              |
|----|--------------|--------------|--------------|
| Ru | -1.148828000 | -0.478283000 | -0.806203000 |
| O  | -4.132258000 | 1.443992000  | 1.588076000  |
| O  | -1.761351000 | -2.074512000 | 3.125675000  |
| N  | -2.222076000 | 0.448582000  | 0.766479000  |
| N  | -2.806688000 | 1.865809000  | -1.696719000 |
| N  | -1.008532000 | 1.855760000  | -2.830597000 |
| N  | -1.702489000 | 2.962212000  | -3.262264000 |
| C  | -1.652532000 | 1.157030000  | -1.869991000 |
| C  | -2.791508000 | 2.939097000  | -2.548368000 |
| H  | -3.587031000 | 3.667174000  | -2.612457000 |
| C  | 0.307527000  | 1.595736000  | -3.416979000 |
| H  | 0.162308000  | 1.462520000  | -4.495112000 |
| H  | 0.651226000  | 0.661688000  | -2.978267000 |
| C  | 1.297409000  | 2.721839000  | -3.132669000 |
| H  | 2.254360000  | 2.495359000  | -3.615951000 |
| H  | 1.459149000  | 2.805931000  | -2.055394000 |
| H  | 0.930684000  | 3.676076000  | -3.521703000 |
| C  | -3.860331000 | 1.509878000  | -0.751318000 |
| H  | -4.455478000 | 0.691128000  | -1.172082000 |
| H  | -4.513683000 | 2.374790000  | -0.630382000 |
| C  | -3.375081000 | 1.122160000  | 0.655439000  |
| C  | -1.851178000 | 0.172727000  | 2.166827000  |
| H  | -2.057597000 | 1.072157000  | 2.756619000  |
| H  | -0.781182000 | -0.019811000 | 2.214014000  |
| C  | -2.552939000 | -0.995527000 | 2.794364000  |
| C  | -3.849590000 | -1.269037000 | 3.128407000  |
| H  | -4.675705000 | -0.588432000 | 2.987289000  |
| C  | -3.864681000 | -2.587818000 | 3.692343000  |
| H  | -4.720465000 | -3.127468000 | 4.075144000  |
| C  | -2.576054000 | -3.027599000 | 3.669886000  |
| H  | -2.086445000 | -3.931307000 | 4.000384000  |
| C  | -2.648162000 | -2.225504000 | -1.224890000 |
| C  | -1.881346000 | -2.582692000 | -0.077337000 |
| H  | -2.395950000 | -2.771461000 | 0.857376000  |
| C  | -0.477751000 | -2.665836000 | -0.113959000 |
| H  | 0.063306000  | -2.916265000 | 0.791971000  |
| C  | 0.242314000  | -2.415646000 | -1.326507000 |
| C  | -0.490258000 | -2.037968000 | -2.466218000 |
| H  | 0.014949000  | -1.824691000 | -3.400403000 |
| C  | -1.912584000 | -1.883972000 | -2.388672000 |
| H  | -2.450524000 | -1.556360000 | -3.274424000 |
| C  | -4.154179000 | -2.237171000 | -1.185401000 |

|   |              |              |              |
|---|--------------|--------------|--------------|
| H | -4.536789000 | -3.260080000 | -1.301209000 |
| H | -4.579928000 | -1.635057000 | -1.995019000 |
| H | -4.524878000 | -1.852384000 | -0.229856000 |
| C | 1.748076000  | -2.619472000 | -1.342471000 |
| H | 2.112862000  | -2.349227000 | -0.344422000 |
| C | 2.499087000  | -1.740587000 | -2.349642000 |
| H | 2.283212000  | -0.685217000 | -2.165293000 |
| H | 2.243894000  | -1.990030000 | -3.387326000 |
| H | 3.577773000  | -1.890539000 | -2.234607000 |
| C | 2.052578000  | -4.117325000 | -1.566488000 |
| H | 1.561390000  | -4.748169000 | -0.817135000 |
| H | 3.132228000  | -4.294023000 | -1.504716000 |
| H | 1.712107000  | -4.443423000 | -2.556827000 |
| C | 1.257949000  | 0.725534000  | 0.741490000  |
| O | 0.577452000  | 0.665104000  | -0.475692000 |
| C | 0.952230000  | 1.992296000  | 1.562228000  |
| C | 0.257800000  | 3.065451000  | 0.997377000  |
| C | 1.397655000  | 2.103447000  | 2.887107000  |
| C | 0.009509000  | 4.223797000  | 1.738586000  |
| H | -0.095237000 | 2.972244000  | -0.023197000 |
| C | 1.147970000  | 3.255538000  | 3.632118000  |
| H | 1.948944000  | 1.280218000  | 3.337409000  |
| C | 0.452110000  | 4.323459000  | 3.058179000  |
| H | -0.535002000 | 5.048763000  | 1.284821000  |
| H | 1.495188000  | 3.320836000  | 4.660482000  |
| H | 0.255288000  | 5.222457000  | 3.636707000  |
| C | 2.747788000  | 0.692664000  | 0.448751000  |
| H | 3.078500000  | 1.455535000  | -0.255131000 |
| C | 3.616523000  | -0.175547000 | 0.991638000  |
| H | 3.226152000  | -0.909226000 | 1.699763000  |
| C | 5.067247000  | -0.265610000 | 0.760439000  |
| C | 5.807708000  | -1.239312000 | 1.455467000  |
| C | 5.764970000  | 0.575455000  | -0.128252000 |
| C | 7.184128000  | -1.371768000 | 1.275252000  |
| H | 5.290603000  | -1.897799000 | 2.150353000  |
| C | 7.138825000  | 0.443783000  | -0.310556000 |
| H | 5.227297000  | 1.341506000  | -0.679405000 |
| C | 7.858151000  | -0.530211000 | 0.389460000  |
| H | 7.729536000  | -2.132180000 | 1.828501000  |
| H | 7.653554000  | 1.106611000  | -1.001691000 |
| H | 8.930762000  | -0.628673000 | 0.245891000  |
| H | 1.040517000  | -0.149657000 | 1.381607000  |

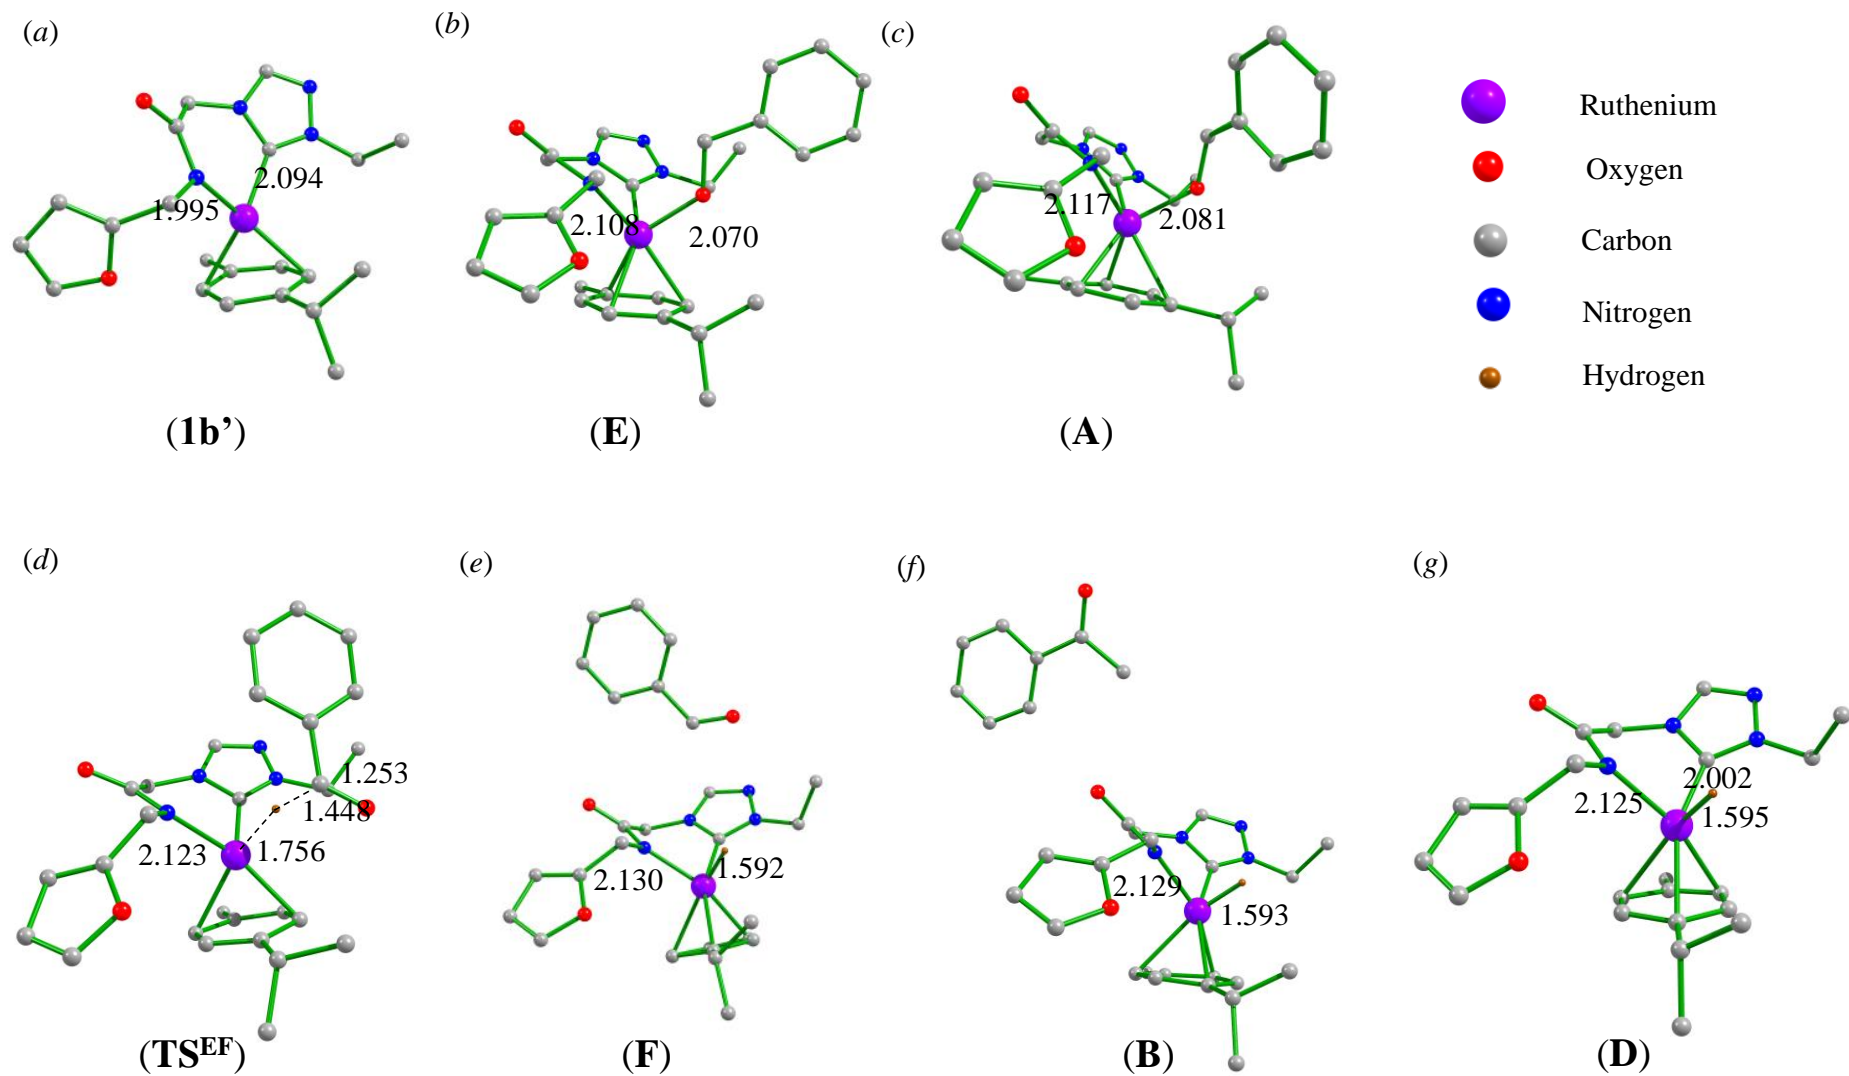

**Figure S140.** DFT Optimised geometries of species involved in the the substitution and dehydrogenation of alcohols : (a) **(1b')**, (b) **(E)**, (c) **(A)**, (d) **TS<sup>EF</sup>**, (e) **(F)**, (f) **(B)**, and (g) **(D)** (deprotonated alcohol pathway).

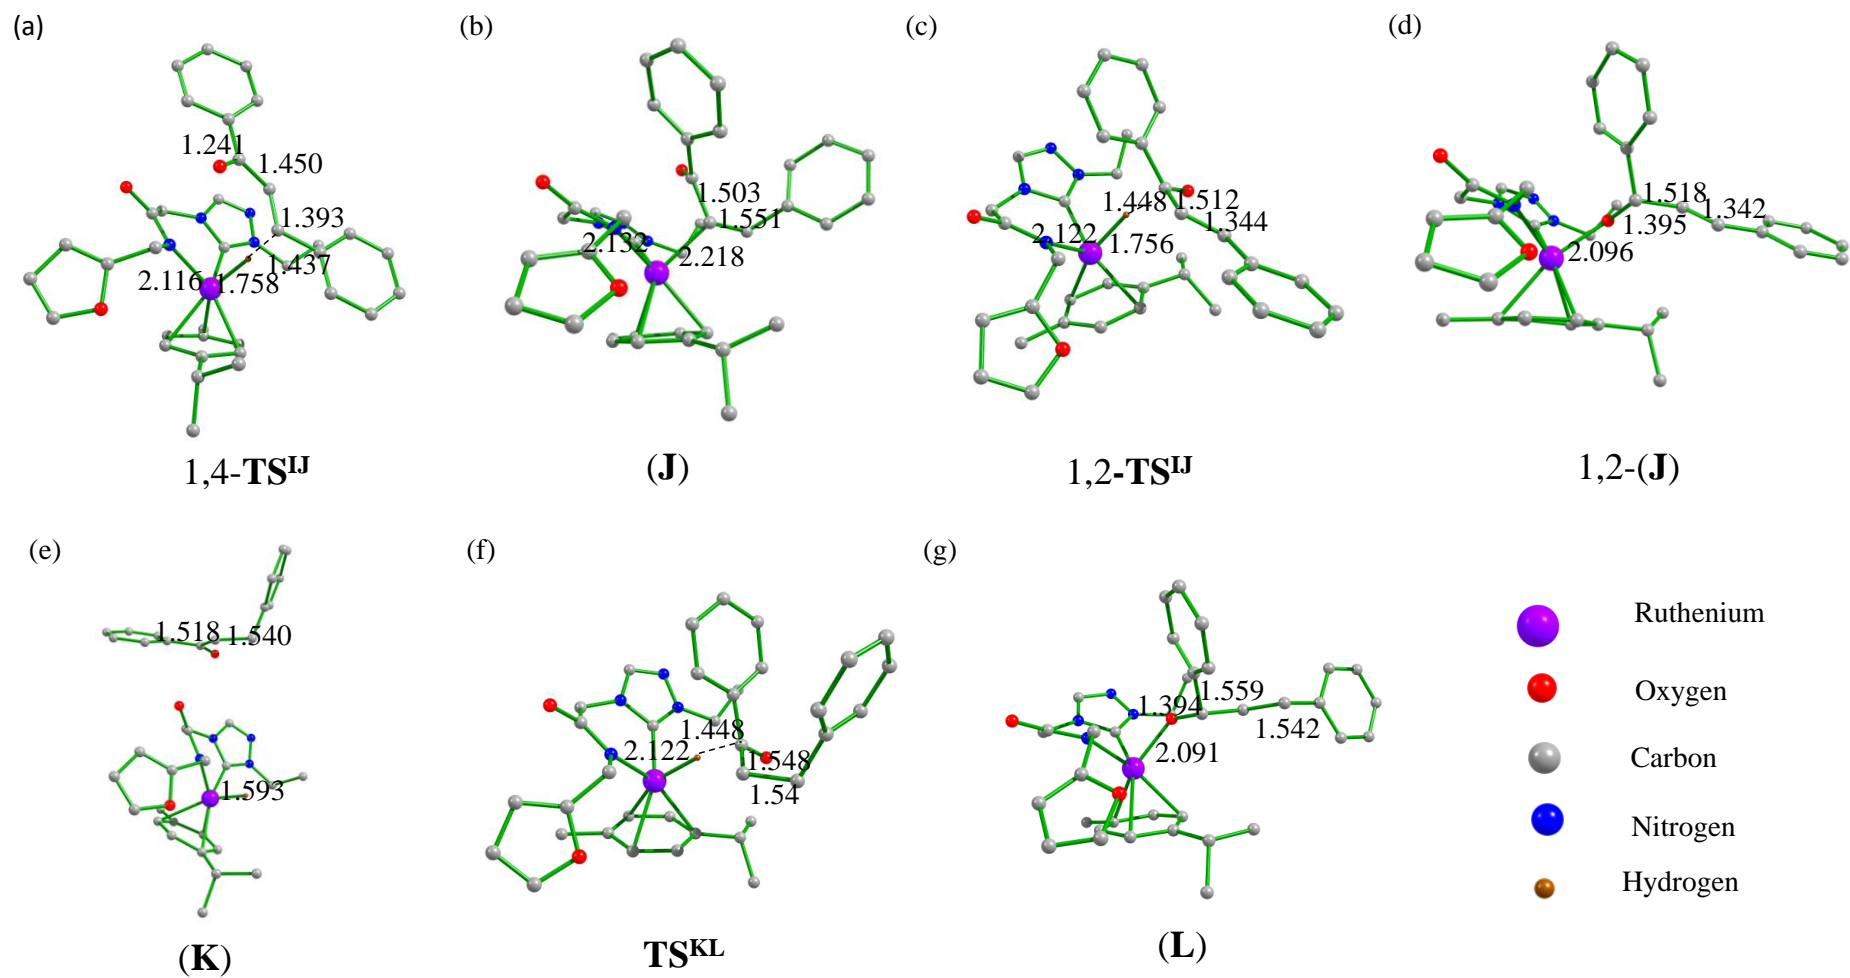

**Figure S141.** DFT Optimised geometries of species involved in the hydrogenation of olefin and ketone (a) 1,4-TS<sup>IJ</sup> (b) (J), (c) 1,2-TS<sup>IJ</sup>, (d) 1,2-(J), (e) (K), (f) TS<sup>KL</sup>, and (g) (L) (deprotonated alcohol pathway).



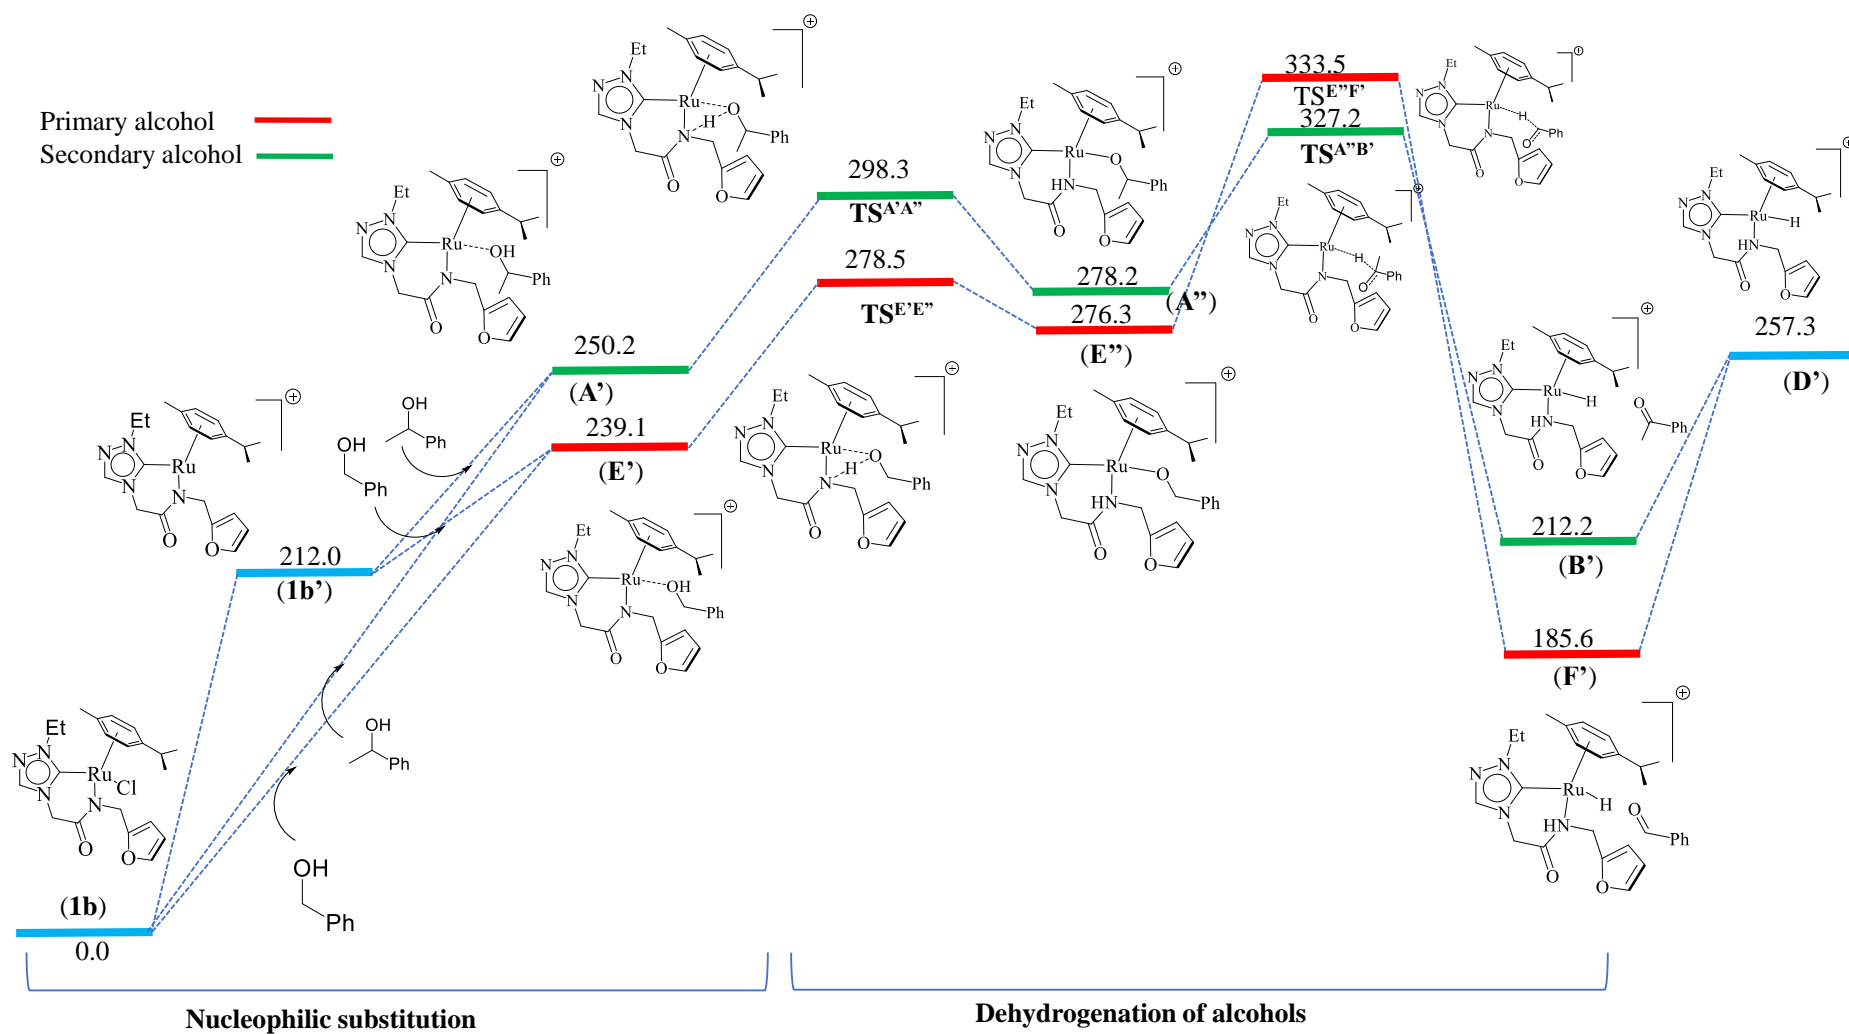

**Figure S142.** Energy profile diagram of nucleophilic substitution and dehydrogenation of alcohols by (1b) (alcohol pathway or the ionic pathway).

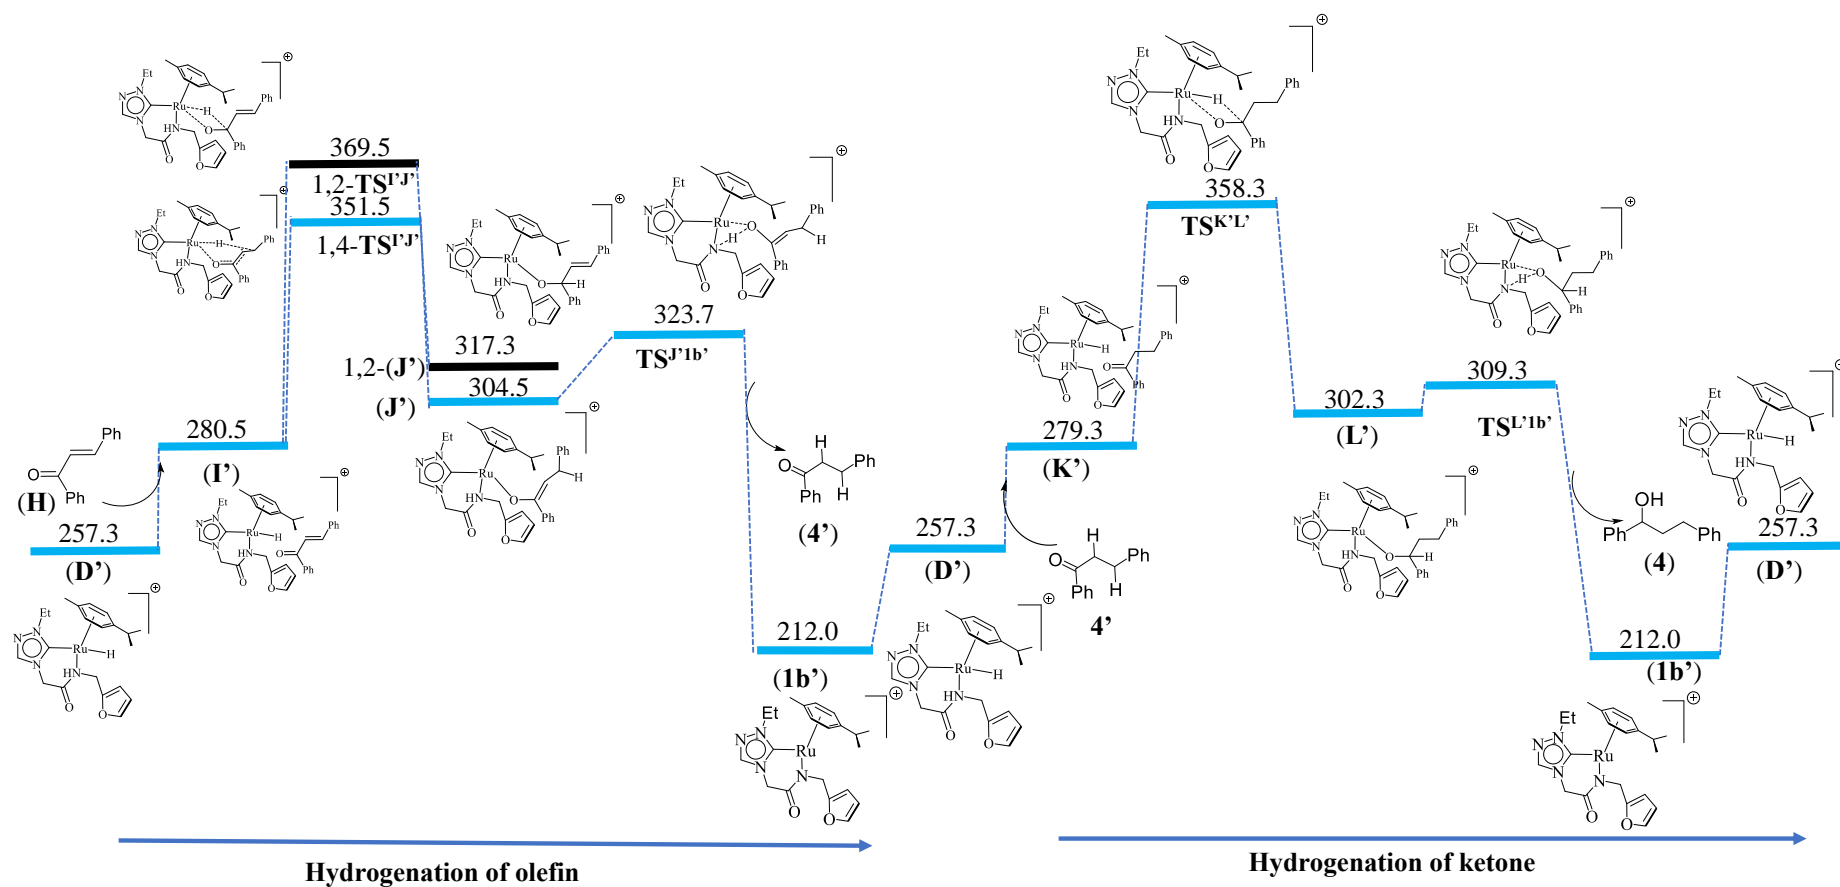

**Figure S143.** Energy profile diagram for hydrogenation of ketone and olefin by ruthenium hydride active species (**D'**) (alcohol pathway or the ionic pathway).

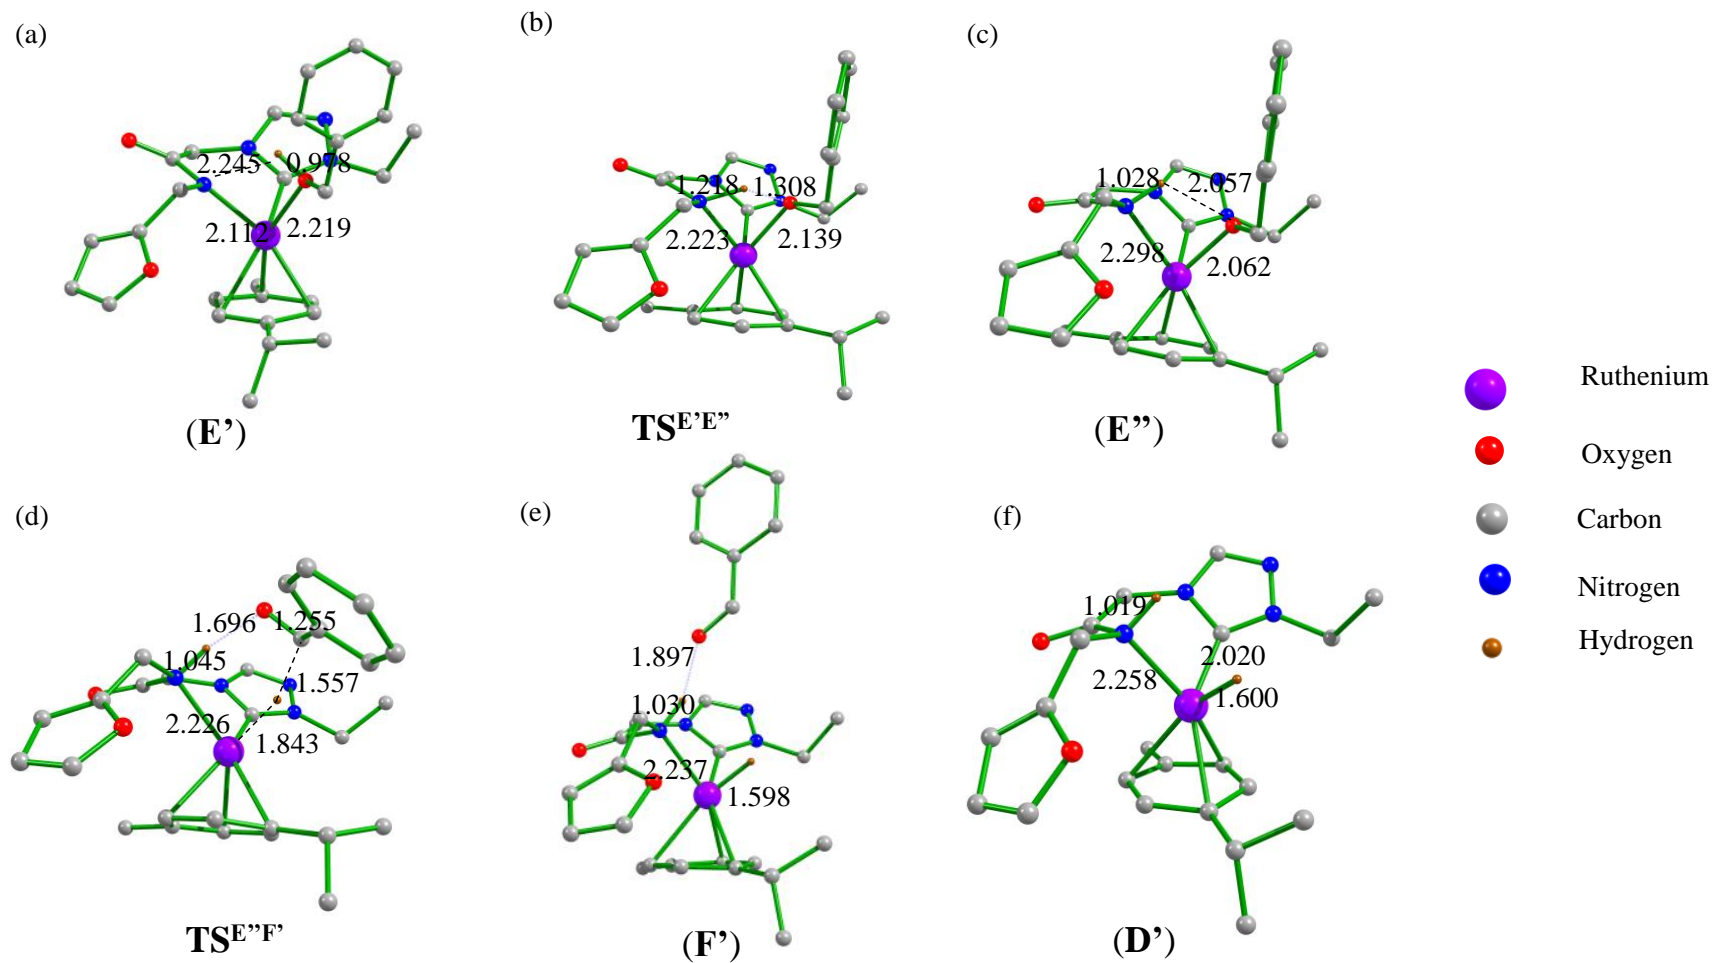

**Figure S144.** DFT optimized geometries involved in the dehydrogenation of primary alcohols (a)  $(E')$ , (b)  $TS^{E'E''}$ , (c)  $(E'')$ , (d)  $TS^{E''F'}$  (e)  $(F')$ , and (f)  $(D')$  (alcohol pathway or the ionic pathway).

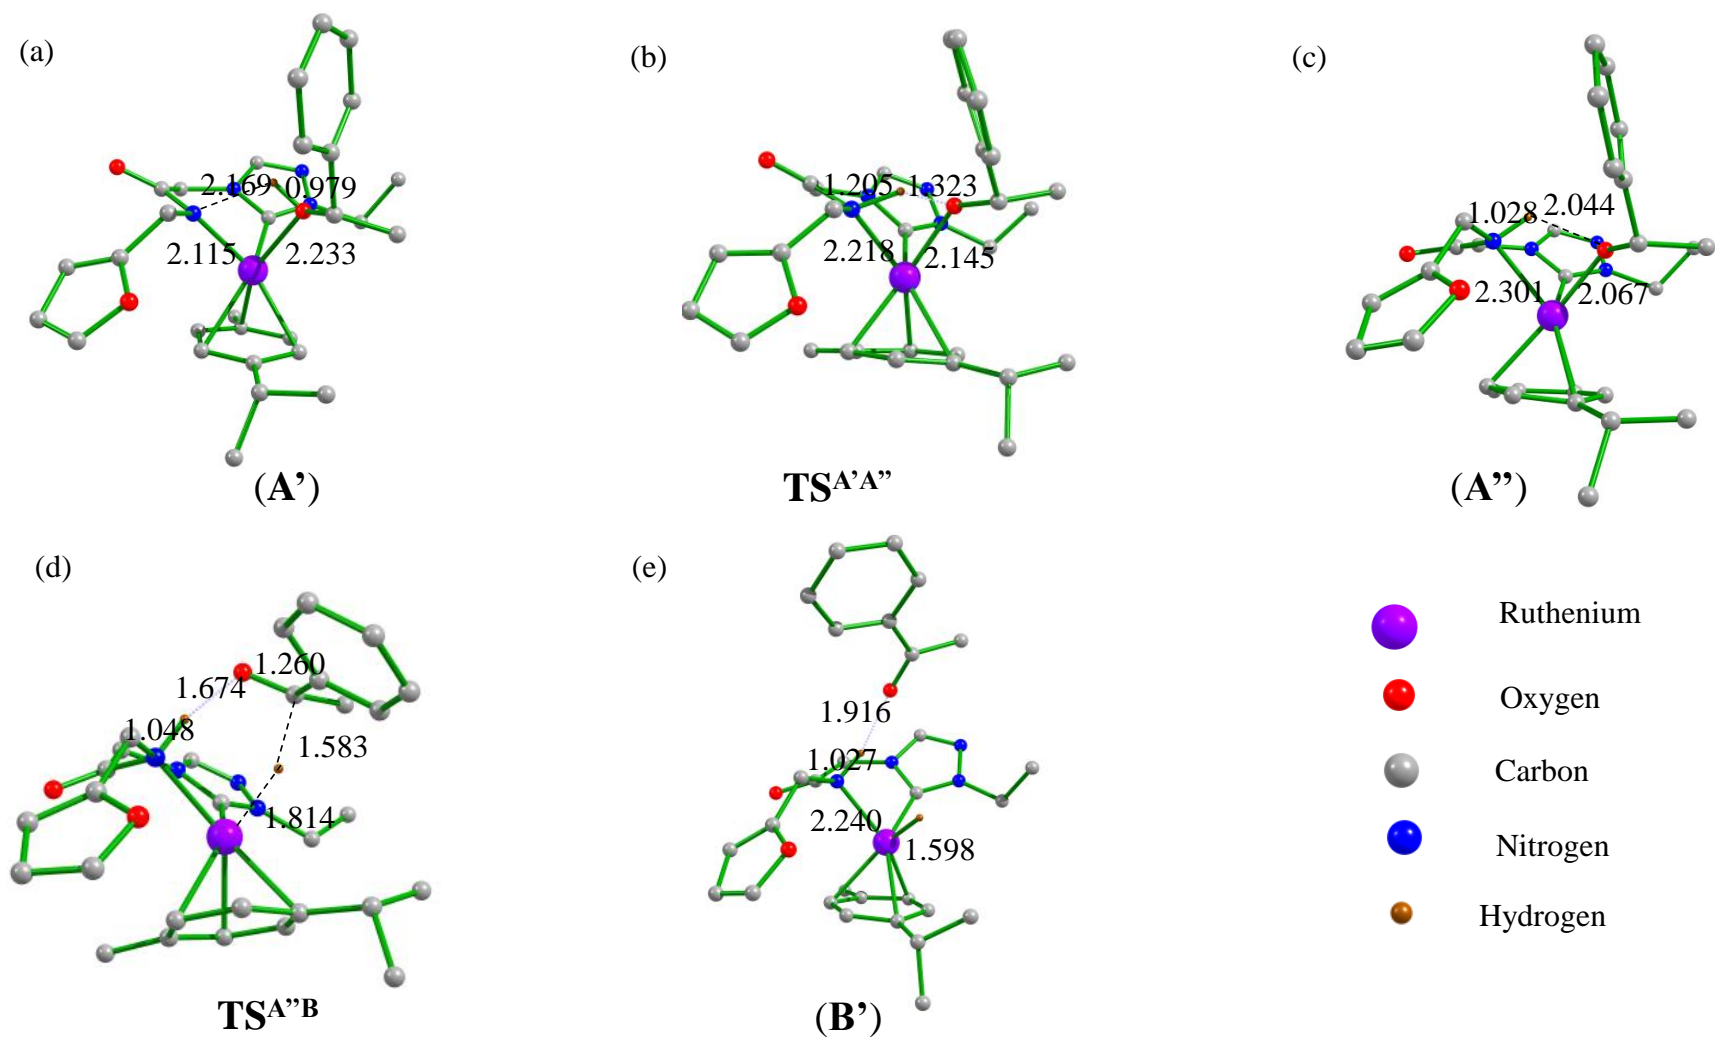

**Figure S145.** DFT optimized geometries involved in the dehydrogenation of secondary alcohols (a)  $(A')$ , (b)  $TS^{A'A''}$  (c)  $(A'')$  (d)  $TS^{A''B}$  and (e)  $(B')$  (alcohol pathway or the ionic pathway).

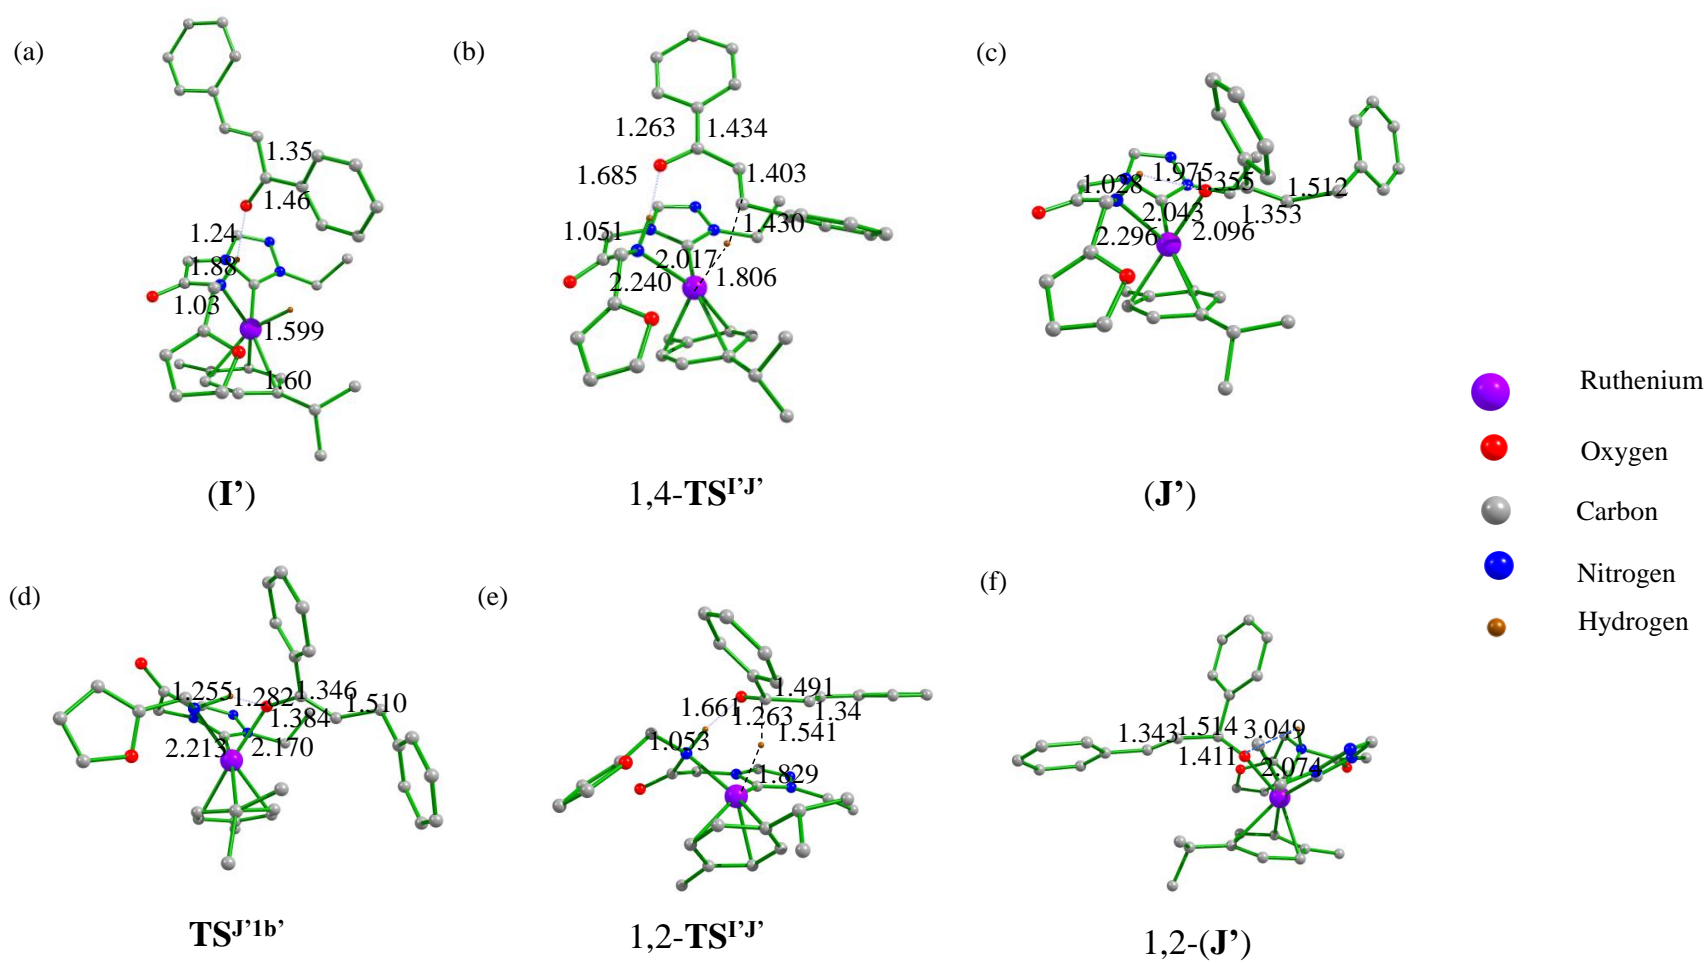

**Figure S146.** DFT optimized geometries of species involved in the (a) **(I')**, (b) **1,4-TS<sup>I'J'</sup>**, (c) **(J')**, (d) **TS<sup>J'1b'</sup>**, (e) **1,2-TS<sup>I'J'</sup>**, and (f) **1,2-(J')** (alcohol pathway or the ionic pathway).

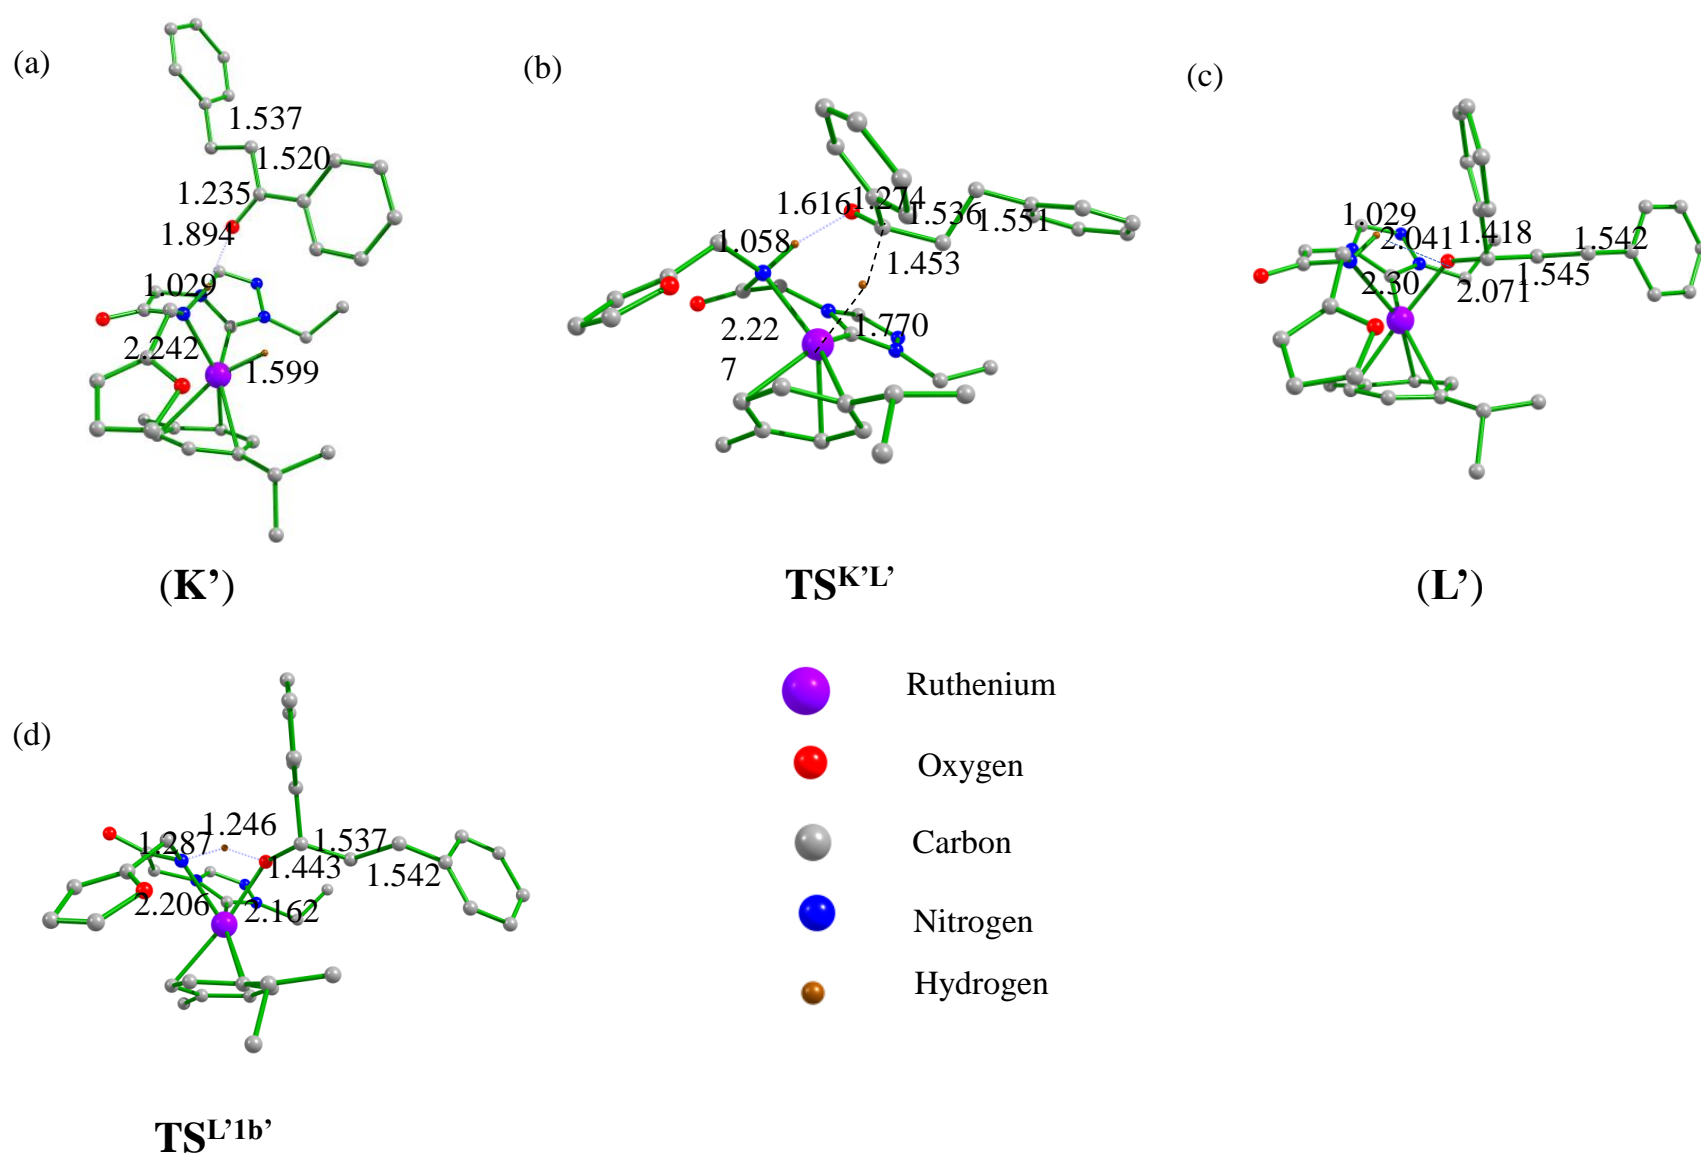

**Figure S147.** DFT optimized geometries involved in the dehydrogenation of secondary alcohols (a) (K'), (b) TS<sup>K'L'</sup>, (c) (L'), and (d) TS<sup>L'1b'</sup> (alcohol pathway or the ionic pathway).

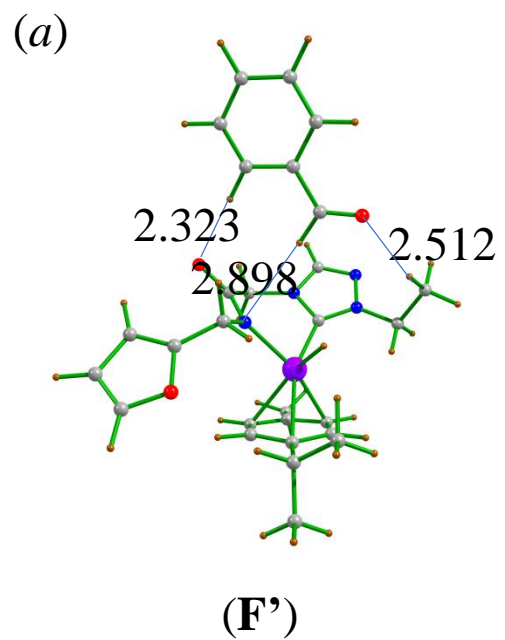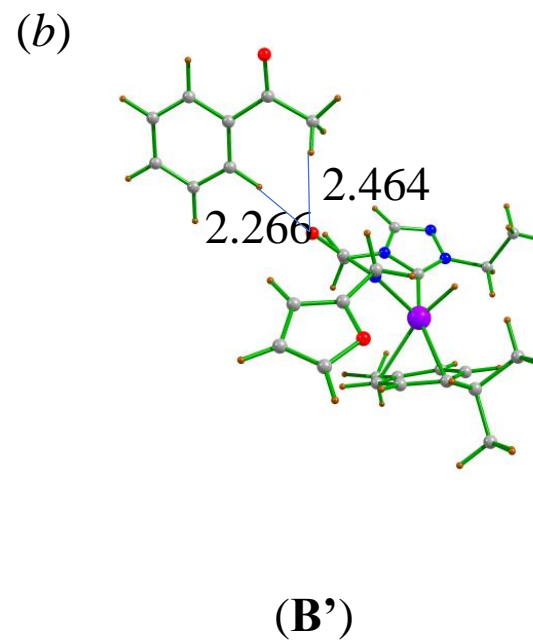

**Figure S148.** Non-covalent interactions present between ruthenium catalyst and aldehyde and ketone (a) **(F')** and (b) **(B')** (alcohol pathway or the ionic pathway).

## References

1. Q. Wang, K. Wu and Z. Yu, *Organometallics*, 2016, **35**, 1251-1256.
2. S. Shee, B. Paul, D. Panja, B. C. Roy, K. Chakrabarti, K. Ganguli, A. Das, G. K. Das and S. Kundu, *Advanced Synthesis & Catalysis*, 2017, **359**, 3888-3893.
3. S. Kumar, A. Narayanan, M. N. Rao, M. M. Shaikh and P. Ghosh, *J. Chem. Sci.*, 2011, **123**, 791-798.
4. A. P. Prakasham, S. Ta, S. Dey and P. Ghosh, *Dalton Transactions*, 2021, **50**, 15640-15654.
